# Supplementary material for: Structural Damage Detection in Reinforced Concrete Frames Using a Novel Objective Function and a Hybrid Manta–Secretary Algorithm: Five-Algorithm Comparison
Source: Research Square preprint supplement (doi:10.21203/rs.3.rs-7040290/v1), 2025-07-21
Supplement: Supplementary file 1 [file bbabf0ef7a89345f00fbbccd.docx]

Structural Damage Detection in Reinforced Concrete Frames Using a Novel Objective Function and a Hybrid Manta–Secretary Algorithm: Five-Algorithm Comparison

**Authors:**

Soheil Sabzevari1, Hosein Naderpour1, Majid Gholhaki*1

1 *Faculty of Civil Engineering, Semnan University, Iran*

***Corresponding author:**

Majid Gholhaki

*E-mail addresses:*

[Sabzevari.soheil@semnan.ac.ir](mailto:Sabzevari.soheil@semnan.ac.ir) (S. Sabzevari),

[naderpour@semnan.ac.ir](mailto:naderpour@semnan.ac.ir) (H. Naderpour)

[Mgholhaki@semnan.ac.ir](mailto:Mgholhaki@semnan.ac.ir) (M. Gholhaki),

| **Supplementary Tables:** |  |
| --- | --- |
| Table 1 | *page 2* |
| Table 2 | *page 3* |
| Table 3 | *page 4* |
| Table 4 | *page 5* |
| Table 5 | *page 6* |
| Table 6 | *page 7* |
| Table 7 | *page 8* |
| Table 8 | *page 9* |
| Table 9 | *page 10* |
| Table 10 | *page 11* |
| Table 11 | *page 12* |
| Table 12 | *page 13* |
| Table 13 | *page 14* |
| Table 14 | *page 30* |
| Table 15 | *page 46* |
| Table 16 | *page 62* |
| Table 17 | *page 78* |
| Table 18 | *page 94* |
| Table 19 | *page 110* |
| Table 20 | *page 126* |
| Table 21 | *page 142* |
| Table 22 | *page 158* |
| Table 23 | *page 174* |
| Table 24 | *page 190* |

Table 1. Identified damage severities for Damage Scenarios 1 under varying noise levels - GOA

| Member | Actual Damage | 0% Noise | 3% Noise | 10% Noise |
| --- | --- | --- | --- | --- |
| 1 | 0 | 0/019336517 | 0/002679 | 0/001653 |
| 2 | 10 | 8/677988772 | 8/930379 | 7/669864 |
| 3 | 0 | 0/026166292 | 0/430881 | 2/484159 |
| 4 | 0 | 0/007568546 | 6/94E-05 | 0/169758 |
| 5 | 0 | 0 | 1/12E-05 | 0/090588 |
| 6 | 0 | 0 | 0/000437 | 0/004554 |
| 7 | 0 | 0/005723726 | 0 | 0/031606 |
| 8 | 0 | 0/010946216 | 0/025359 | 0/651505 |
| 9 | 0 | 0/001888733 | 1/185294 | 7/06005 |
| 10 | 0 | 0/043819958 | 0/820821 | 4/333222 |
| 11 | 0 | 0 | 0/92936 | 8/081168 |
| 12 | 0 | 0/018875313 | 0/038457 | 7/25E-05 |
| 13 | 0 | 0/340178818 | 0/018184 | 0/028484 |
| 14 | 0 | 1/11994E-05 | 0/045552 | 0/176 |
| 15 | 0 | 0 | 0/000403 | 1/379292 |
| 16 | 0 | 0/014509528 | 0/028726 | 0/05309 |
| 17 | 0 | 3/32223E-06 | 0/002104 | 0/122914 |
| 18 | 15 | 15/0390532 | 15/38172 | 16/50676 |
| 19 | 0 | 0/006409459 | 0/336711 | 0/21229 |

Table 2. Identified damage severities for Damage Scenarios 2 under varying noise levels - GOA

| Member | Actual Damage | 0% Noise | 3% Noise | 10% Noise |
| --- | --- | --- | --- | --- |
| 1 | 0 | 0/022174 | 2/395023 | 0/075076 |
| 2 | 0 | 6/78E-05 | 1/026226 | 0/000847 |
| 3 | 20 | 19/47362 | 22/07751 | 21/97589 |
| 4 | 0 | 0/003636 | 0/011347 | 1/352765 |
| 5 | 0 | 0 | 0/646837 | 4/359275 |
| 6 | 0 | 0/024978 | 7/042701 | 0/261345 |
| 7 | 0 | 0/066381 | 0/592758 | 0 |
| 8 | 30 | 29/81071 | 29.99856 | 30.02548 |
| 9 | 0 | 4/96E-06 | 0/115291 | 14/49439 |
| 10 | 0 | 0/029148 | 0/005917 | 8/927707 |
| 11 | 0 | 0/09174 | 0/186342 | 14/59433 |
| 12 | 0 | 0/000696 | 9/74E-05 | 0/050997 |
| 13 | 0 | 0/000139 | 0/016993 | 0/175498 |
| 14 | 0 | 0/012206 | 0/389241 | 1/892488 |
| 15 | 0 | 0/001403 | 0/042335 | 0/003485 |
| 16 | 0 | 0/017062 | 0/392445 | 0/082287 |
| 17 | 25 | 24/32747 | 24/94821 | 25/74807 |
| 18 | 0 | 0/005152 | 0/314491 | 0/651845 |
| 19 | 0 | 0/014923 | 0/073624 | 0 |

Table 3. Identified damage severities for Damage Scenarios 1 under varying noise levels - WOA

| Member | Actual Damage | 0% Noise | 3% Noise | 10% Noise |
| --- | --- | --- | --- | --- |
| 1 | 0 | 0/00982 | 1/320196 | 4/754727 |
| 2 | 10 | 9/664664 | 11/34004 | 13/60235 |
| 3 | 0 | 0 | 0/064229 | 2/588674 |
| 4 | 0 | 1/72E-05 | 0/631598 | 3/039968 |
| 5 | 0 | 0/00523 | 0/003619 | 2/893266 |
| 6 | 0 | 0/023365 | 2/712307 | 0/07379 |
| 7 | 0 | 0/002254 | 0/890261 | 4/197379 |
| 8 | 0 | 0/001455 | 0/018306 | 0/373136 |
| 9 | 0 | 0/313962 | 0/004186 | 0/097941 |
| 10 | 0 | 0 | 0/030129 | 0/319269 |
| 11 | 0 | 0/081047 | 0/274978 | 0/262979 |
| 12 | 0 | 0/138988 | 0/004848 | 6/096259 |
| 13 | 0 | 0/25763 | 0/015758 | 7/223164 |
| 14 | 0 | 0/007154 | 1/124673 | 3/572227 |
| 15 | 0 | 0/032721 | 1/411809 | 6/205343 |
| 16 | 0 | 0/011172 | 1/33763 | 5/955311 |
| 17 | 0 | 0/047591 | 0/029525 | 0/201453 |
| 18 | 15 | 14/80577 | 15/10844 | 14/19362 |
| 19 | 0 | 0/000573 | 0/111317 | 0/421007 |

Table 4. Identified damage severities for Damage Scenarios 2 under varying noise levels - WOA

| Member | Actual Damage | 0% Noise | 3% Noise | 10% Noise |
| --- | --- | --- | --- | --- |
| 1 | 0 | 1/333055 | 3/888269 | 9/620744 |
| 2 | 0 | 0/84789 | 2/622741 | 0/559311 |
| 3 | 20 | 20/69696 | 22/27006 | 29/00479 |
| 4 | 0 | 0 | 2/787093 | 9/484143 |
| 5 | 0 | 0/002554 | 0/905055 | 6/721898 |
| 6 | 0 | 0/012127 | 0/019719 | 0/828838 |
| 7 | 0 | 0/046813 | 2/993515 | 8/934461 |
| 8 | 30 | 30.00095 | 30.02585 | 30.04999 |
| 9 | 0 | 0/018978 | 0/241452 | 20/09408 |
| 10 | 0 | 0 | 0/067367 | 9/763864 |
| 11 | 0 | 0 | 0 | 2/824122 |
| 12 | 0 | 1/474726 | 4/03685 | 13/43293 |
| 13 | 0 | 1/697076 | 4/703631 | 15/65737 |
| 14 | 0 | 0/655116 | 3/202059 | 10/5049 |
| 15 | 0 | 0/006453 | 4/356767 | 0/758386 |
| 16 | 0 | 0/572266 | 4/143583 | 10/94755 |
| 17 | 25 | 25/6054 | 26/25769 | 29/21931 |
| 18 | 0 | 0/678091 | 0/000804 | 16/7063 |
| 19 | 0 | 0/210551 | 0/700134 | 3/444536 |

Table 5. Identified damage severities for Damage Scenarios 1 under varying noise levels - MRFO

| Member | Actual Damage | 0% Noise | 3% Noise | 10% Noise |
| --- | --- | --- | --- | --- |
| 1 | 0 | 0/000225 | 0 | 0/019277 |
| 2 | 10 | 9/965718 | 10/18853 | 12/26628 |
| 3 | 0 | 0/025776 | 0/328937 | 0 |
| 4 | 0 | 0/000954 | 0/183401 | 0/988589 |
| 5 | 0 | 0/011978 | 0/368716 | 3/489171 |
| 6 | 0 | 0/03226 | 0/004811 | 0/038527 |
| 7 | 0 | 0/000108 | 0/039922 | 2/72E-05 |
| 8 | 0 | 0/003457 | 0 | 0/241477 |
| 9 | 0 | 0/005966 | 0/33587 | 0/010375 |
| 10 | 0 | 0/052659 | 0 | 0/091191 |
| 11 | 0 | 0/059664 | 0/423219 | 0/003077 |
| 12 | 0 | 0/012186 | 1/07E-07 | 2/992765 |
| 13 | 0 | 0/018887 | 0/005098 | 3/117686 |
| 14 | 0 | 0/000657 | 0/054267 | 1/553683 |
| 15 | 0 | 0/051999 | 3/05E-05 | 0/002238 |
| 16 | 0 | 0/004635 | 0/000968 | 1/166382 |
| 17 | 0 | 0/012025 | 0/21854 | 0/38646 |
| 18 | 15 | 14/99637 | 15/33921 | 14/61109 |
| 19 | 0 | 5/71E-05 | 0/234969 | 0/050937 |

Table 6. Identified damage severities for Damage Scenarios 2 under varying noise levels - MRFO

| Member | Actual Damage | 0% Noise | 3% Noise | 10% Noise |
| --- | --- | --- | --- | --- |
| 1 | 0 | 0/006992 | 0/211356 | 7/014682 |
| 2 | 0 | 0/045992 | 0/058806 | 6/31586 |
| 3 | 20 | 19/95176 | 21/25668 | 24/00637 |
| 4 | 0 | 0/02225 | 0/075033 | 6/933582 |
| 5 | 0 | 0/005605 | 0/695507 | 3/33E-07 |
| 6 | 0 | 0/003205 | 0/070827 | 1/16E-05 |
| 7 | 0 | 0/012196 | 0/003177 | 4/51468 |
| 8 | 30 | 29/99052 | 30.03585 | 30.0444 |
| 9 | 0 | 0/02441 | 1/922682 | 0/53571 |
| 10 | 0 | 0 | 1/390987 | 0/26829 |
| 11 | 0 | 0/099474 | 2/784783 | 0/201126 |
| 12 | 0 | 0/001185 | 0/311073 | 7/586324 |
| 13 | 0 | 0/010042 | 0/026614 | 8/94742 |
| 14 | 0 | 0/055289 | 0/249629 | 8/391277 |
| 15 | 0 | 0/094536 | 0/015731 | 8/844238 |
| 16 | 0 | 0/046159 | 0/204472 | 8/700917 |
| 17 | 25 | 24/97625 | 25/6997 | 28/35225 |
| 18 | 0 | 0/011453 | 1/810222 | 0/148391 |
| 19 | 0 | 0/004091 | 0/168324 | 0/320295 |

Table 7. Identified damage severities for Damage Scenarios 1 under varying noise levels - SBOA

| Member | Actual Damage | 0% Noise | 3% Noise | 10% Noise |
| --- | --- | --- | --- | --- |
| 1 | 0 | 0/214987 | 0/637833 | 2/662059 |
| 2 | 10 | 10/37886 | 10/45914 | 11/25628 |
| 3 | 0 | 0/001185 | 0/009695 | 0/146894 |
| 4 | 0 | 0/000257 | 0/452219 | 2/081547 |
| 5 | 0 | 0/004452 | 0/013136 | 1/261866 |
| 6 | 0 | 0/000456 | 0/651892 | 0/038464 |
| 7 | 0 | 0/147442 | 0/661564 | 0/133027 |
| 8 | 0 | 0/00074 | 0/017585 | 0/006673 |
| 9 | 0 | 0/065308 | 0/106169 | 0/017587 |
| 10 | 0 | 0/024499 | 0/237111 | 0/001473 |
| 11 | 0 | 0/031409 | 0/186815 | 0/423906 |
| 12 | 0 | 0/135688 | 0/549637 | 3/835992 |
| 13 | 0 | 0/08181 | 0/568264 | 6/367825 |
| 14 | 0 | 0 | 0/544953 | 2/375995 |
| 15 | 0 | 0/179463 | 0/515801 | 0/310444 |
| 16 | 0 | 0/180884 | 0/46152 | 0/022982 |
| 17 | 0 | 0 | 0/137018 | 0/005753 |
| 18 | 15 | 14/96691 | 15/12027 | 14/84081 |
| 19 | 0 | 0/009321 | 0/057674 | 0/686499 |

Table 8. Identified damage severities for Damage Scenarios 2 under varying noise levels - SBOA

| Member | Actual Damage | 0% Noise | 3% Noise | 10% Noise |
| --- | --- | --- | --- | --- |
| 1 | 0 | 0/053307 | 2/805334 | 3/612221 |
| 2 | 0 | 0/089773 | 2/175466 | 0/148209 |
| 3 | 20 | 19/94998 | 22/19275 | 26/09167 |
| 4 | 0 | 0/417537 | 0 | 8/721701 |
| 5 | 0 | 0 | 1/803517 | 5/34941 |
| 6 | 0 | 0/037253 | 3/877549 | 0/000169 |
| 7 | 0 | 0/009387 | 2/196331 | 0/19339 |
| 8 | 30 | 29/91175 | 30.04256 | 29/47042 |
| 9 | 0 | 0/274453 | 0/713255 | 12/8379 |
| 10 | 0 | 0/203877 | 0/531229 | 9/875667 |
| 11 | 0 | 0/293859 | 0/700882 | 11/65556 |
| 12 | 0 | 0/00127 | 3/583695 | 0/016058 |
| 13 | 0 | 0/112667 | 3/732218 | 2/204229 |
| 14 | 0 | 0/672654 | 1/232672 | 8/711769 |
| 15 | 0 | 0/209122 | 2/735718 | 4/649154 |
| 16 | 0 | 0/262644 | 2/937854 | 4/824867 |
| 17 | 25 | 25/09048 | 25/26988 | 28/31107 |
| 18 | 0 | 0/210826 | 0/021164 | 5/799096 |
| 19 | 0 | 0/064181 | 0/344015 | 5/538569 |

Table 9. Identified damage severities for Damage Scenarios 1 under varying noise levels - AOA

| Member | Actual Damage | 0% Noise | 3% Noise | 10% Noise |
| --- | --- | --- | --- | --- |
| 1 | 0 | 0/02319 | 2/200624 | 0/025815 |
| 2 | 10 | 10/38918 | 12/05182 | 10/62951 |
| 3 | 0 | 0/120723 | 2/131889 | 0/021786 |
| 4 | 0 | 0 | 0/03742 | 1/588134 |
| 5 | 0 | 0/479536 | 2/485242 | 2/848764 |
| 6 | 0 | 0/11345 | 2/754776 | 0/038402 |
| 7 | 0 | 0/410899 | 1/943891 | 0/138271 |
| 8 | 0 | 0 | 0/752646 | 0/023688 |
| 9 | 0 | 0/002194 | 0/271328 | 0/28521 |
| 10 | 0 | 0/000286 | 0/001776 | 0/068227 |
| 11 | 0 | 0/009503 | 0 | 0/310168 |
| 12 | 0 | 0/430534 | 2/623958 | 5/932453 |
| 13 | 0 | 0/271124 | 2/390957 | 7/783242 |
| 14 | 0 | 0/00923 | 1/077682 | 3/152663 |
| 15 | 0 | 0/000105 | 1/722758 | 0/022398 |
| 16 | 0 | 0/083694 | 2/475419 | 0/00284 |
| 17 | 0 | 1/95E-07 | 0/875792 | 0/108493 |
| 18 | 15 | 15/07946 | 16/07766 | 13/78166 |
| 19 | 0 | 0/031135 | 1/302463 | 0/036858 |

Table 10. Identified damage severities for Damage Scenarios 2 under varying noise levels - AOA

| Member | Actual Damage | 0% Noise | 3% Noise | 10% Noise |
| --- | --- | --- | --- | --- |
| 1 | 0 | 0/01754 | 0/006843 | 5/152321 |
| 2 | 0 | 0/032281 | 0 | 0 |
| 3 | 20 | 17/57043 | 19/89594 | 23/66788 |
| 4 | 0 | 2/15E-05 | 0/016696 | 0/109717 |
| 5 | 0 | 0/005576 | 0/01418 | 0/162746 |
| 6 | 0 | 0/014767 | 0/169478 | 0/911725 |
| 7 | 0 | 0/051596 | 0/004674 | 2/534841 |
| 8 | 30 | 29/88478 | 30.04689 | 29/99 |
| 9 | 0 | 0/458369 | 8/235389 | 0/024137 |
| 10 | 0 | 0/367767 | 5/852478 | 0/011589 |
| 11 | 0 | 1/492992 | 8/807831 | 0/732558 |
| 12 | 0 | 0/000383 | 0/000123 | 14/13009 |
| 13 | 0 | 0/003663 | 0/007664 | 16/7936 |
| 14 | 0 | 0/09664 | 0/00131 | 0/292067 |
| 15 | 0 | 0/016151 | 0/004455 | 0/923568 |
| 16 | 0 | 0/000376 | 0/034992 | 1/21668 |
| 17 | 25 | 22/44349 | 25/3983 | 24/20855 |
| 18 | 0 | 0/525481 | 1/473178 | 0/127328 |
| 19 | 0 | 0/01084 | 0/387857 | 0/026835 |

Table 11. Identified damage severities for Damage Scenarios 1 under varying noise levels - MSOA

| Member | Actual Damage | 0% Noise | 3% Noise | 10% Noise |
| --- | --- | --- | --- | --- |
| 1 | 0 | 0 | 0/000108 | 0/13364 |
| 2 | 10 | 9/800796 | 9/608957 | 11/45323 |
| 3 | 0 | 0/019565 | 0/005645 | 0/287443 |
| 4 | 0 | 0/005855 | 0/001694 | 0/516228 |
| 5 | 0 | 0/000885 | 0/005115 | 1/551018 |
| 6 | 0 | 0/063426 | 0/055037 | 0/379578 |
| 7 | 0 | 0 | 5/14E-05 | 1/070481 |
| 8 | 0 | 0/040478 | 0/005068 | 0/747709 |
| 9 | 0 | 0/074189 | 0/247453 | 0/065952 |
| 10 | 0 | 0/039911 | 0/067635 | 0/151211 |
| 11 | 0 | 0/013476 | 0/045948 | 0/228373 |
| 12 | 0 | 0/011953 | 0 | 0/441823 |
| 13 | 0 | 0/045188 | 0/058033 | 0/046831 |
| 14 | 0 | 0/002159 | 0/007202 | 0/124667 |
| 15 | 0 | 3/07E-05 | 0/002884 | 0/576534 |
| 16 | 0 | 0/001811 | 0 | 0/717495 |
| 17 | 0 | 0 | 0/000228 | 0/819624 |
| 18 | 15 | 14/9734 | 14/81144 | 15/6745 |
| 19 | 0 | 0/026811 | 0/010812 | 0/687522 |

Table 12. Identified damage severities for Damage Scenarios 2 under varying noise levels - MSOA

| Member | Actual Damage | 0% Noise | 3% Noise | 10% Noise |
| --- | --- | --- | --- | --- |
| 1 | 0 | 0 | 0/237246 | 1/08294 |
| 2 | 0 | 0 | 0/518887 | 1/588255 |
| 3 | 20 | 19/95932 | 20/01988 | 21/04332 |
| 4 | 0 | 0/002621 | 0/045909 | 0/91454 |
| 5 | 0 | 0/066435 | 0/237109 | 0/101263 |
| 6 | 0 | 0/026121 | 0/354207 | 0/003774 |
| 7 | 0 | 0/018018 | 0/294451 | 0/226351 |
| 8 | 30 | 29/97819 | 29/96807 | 30.04982 |
| 9 | 0 | 0/003822 | 0/074876 | 0/475691 |
| 10 | 0 | 0/039401 | 0/051273 | 0 |
| 11 | 0 | 0/10682 | 0/004237 | 0/909835 |
| 12 | 0 | 0/001481 | 0/000195 | 1/005599 |
| 13 | 0 | 0/039737 | 0/067429 | 0/825459 |
| 14 | 0 | 0/096608 | 0/349254 | 1/152254 |
| 15 | 0 | 0/040911 | 0/128059 | 1/281344 |
| 16 | 0 | 0/007732 | 0/034871 | 1/44207 |
| 17 | 25 | 24/95792 | 24/95946 | 25/5041 |
| 18 | 0 | 0/085352 | 0/022382 | 1/09042 |
| 19 | 0 | 0/03912 | 0/120784 | 0/20198 |

Table 13. Cost function convergence for Damage Scenario 1 under varying noise levels - GOA.

| Iterations | 0% Noise | 3% Noise | 10% Noise | Iterations | 0% Noise | 3% Noise | 10% Noise |
| --- | --- | --- | --- | --- | --- | --- | --- |
| 1 | 0/262498 | 0/282512 | 0/282893 | **1001** | 0/00265 | 0/016702 | 0/02209 |
| 2 | 0/199888 | 0/154517 | 0/223286 | **1002** | 0/00265 | 0/016702 | 0/02209 |
| 3 | 0/145032 | 0/147455 | 0/168554 | **1003** | 0/00265 | 0/016702 | 0/02209 |
| 4 | 0/118675 | 0/08469 | 0/122311 | **1004** | 0/00265 | 0/016702 | 0/02209 |
| 5 | 0/070097 | 0/073171 | 0/096981 | **1005** | 0/00265 | 0/016702 | 0/02209 |
| 6 | 0/043329 | 0/053766 | 0/075364 | **1006** | 0/00265 | 0/016702 | 0/02209 |
| 7 | 0/038816 | 0/046631 | 0/060162 | **1007** | 0/00265 | 0/016702 | 0/02209 |
| 8 | 0/032031 | 0/037836 | 0/051193 | **1008** | 0/00265 | 0/016702 | 0/02209 |
| 9 | 0/02086 | 0/037697 | 0/051193 | **1009** | 0/00265 | 0/016702 | 0/02209 |
| 10 | 0/02086 | 0/035854 | 0/046474 | **1010** | 0/00265 | 0/016702 | 0/02209 |
| 11 | 0/019561 | 0/031528 | 0/043955 | **1011** | 0/00265 | 0/016702 | 0/02209 |
| 12 | 0/019561 | 0/031528 | 0/038757 | **1012** | 0/00265 | 0/016702 | 0/02209 |
| 13 | 0/019561 | 0/027941 | 0/038757 | **1013** | 0/00265 | 0/016702 | 0/02209 |
| 14 | 0/019561 | 0/027941 | 0/034694 | **1014** | 0/00265 | 0/016702 | 0/02209 |
| 15 | 0/016949 | 0/027941 | 0/034089 | **1015** | 0/00265 | 0/016702 | 0/02209 |
| 16 | 0/01549 | 0/027941 | 0/034089 | **1016** | 0/00265 | 0/016702 | 0/02209 |
| 17 | 0/01549 | 0/02728 | 0/03002 | **1017** | 0/00265 | 0/016702 | 0/02209 |
| 18 | 0/015256 | 0/027157 | 0/027748 | **1018** | 0/00265 | 0/016702 | 0/02209 |
| 19 | 0/014065 | 0/027157 | 0/027748 | **1019** | 0/00265 | 0/016702 | 0/02209 |
| 20 | 0/014065 | 0/026613 | 0/027748 | **1020** | 0/00265 | 0/016702 | 0/02209 |
| 21 | 0/014065 | 0/026613 | 0/027748 | **1021** | 0/00265 | 0/016702 | 0/02209 |
| 22 | 0/010389 | 0/026613 | 0/027748 | **1022** | 0/00265 | 0/016702 | 0/02209 |
| 23 | 0/010389 | 0/026613 | 0/027748 | **1023** | 0/00265 | 0/016702 | 0/02209 |
| 24 | 0/00924 | 0/025359 | 0/027748 | **1024** | 0/00265 | 0/016702 | 0/02209 |
| 25 | 0/008456 | 0/024222 | 0/027748 | **1025** | 0/00265 | 0/016702 | 0/02209 |
| 26 | 0/008456 | 0/024222 | 0/027748 | **1026** | 0/00265 | 0/016702 | 0/02209 |
| 27 | 0/008456 | 0/022555 | 0/027748 | **1027** | 0/00265 | 0/016702 | 0/02209 |
| 28 | 0/008456 | 0/022555 | 0/027748 | **1028** | 0/00265 | 0/016702 | 0/02209 |
| 29 | 0/007083 | 0/022555 | 0/027748 | **1029** | 0/00265 | 0/016702 | 0/02209 |
| 30 | 0/007083 | 0/022555 | 0/027748 | **1030** | 0/00265 | 0/016702 | 0/02209 |
| 31 | 0/007083 | 0/022555 | 0/027748 | **1031** | 0/00265 | 0/016702 | 0/02209 |
| 32 | 0/007083 | 0/022555 | 0/027748 | **1032** | 0/00265 | 0/016702 | 0/02209 |
| 33 | 0/007083 | 0/022555 | 0/027748 | **1033** | 0/00265 | 0/016702 | 0/02209 |
| 34 | 0/007083 | 0/022555 | 0/027748 | **1034** | 0/00265 | 0/016702 | 0/02209 |
| 35 | 0/007083 | 0/022555 | 0/027748 | **1035** | 0/00265 | 0/016702 | 0/02209 |
| 36 | 0/007083 | 0/022555 | 0/027748 | **1036** | 0/00265 | 0/016702 | 0/02209 |
| 37 | 0/007083 | 0/022555 | 0/027167 | **1037** | 0/00265 | 0/016702 | 0/02209 |
| 38 | 0/007083 | 0/020885 | 0/027167 | **1038** | 0/00265 | 0/016702 | 0/02209 |
| 39 | 0/006057 | 0/020885 | 0/027167 | **1039** | 0/00265 | 0/016702 | 0/02209 |
| 40 | 0/005499 | 0/020885 | 0/025886 | **1040** | 0/00265 | 0/016702 | 0/02209 |
| 41 | 0/005499 | 0/020885 | 0/025886 | **1041** | 0/00265 | 0/016702 | 0/02209 |
| 42 | 0/005499 | 0/020885 | 0/025886 | **1042** | 0/00265 | 0/016702 | 0/02209 |
| 43 | 0/005236 | 0/020885 | 0/025886 | **1043** | 0/00265 | 0/016702 | 0/02209 |
| 44 | 0/005236 | 0/020885 | 0/025886 | **1044** | 0/00265 | 0/016702 | 0/02209 |
| 45 | 0/005236 | 0/020885 | 0/025886 | **1045** | 0/00265 | 0/016702 | 0/02209 |
| 46 | 0/005236 | 0/020885 | 0/025886 | **1046** | 0/00265 | 0/016702 | 0/02209 |
| 47 | 0/005236 | 0/019911 | 0/025886 | **1047** | 0/00265 | 0/016702 | 0/02209 |
| 48 | 0/005236 | 0/019911 | 0/025886 | **1048** | 0/00265 | 0/016702 | 0/02209 |
| 49 | 0/005236 | 0/019911 | 0/025886 | **1049** | 0/00265 | 0/016702 | 0/02209 |
| 50 | 0/005236 | 0/019911 | 0/025886 | **1050** | 0/00265 | 0/016702 | 0/02209 |
| 51 | 0/005236 | 0/019911 | 0/025886 | **1051** | 0/00265 | 0/016702 | 0/02209 |
| 52 | 0/005236 | 0/019911 | 0/025886 | **1052** | 0/00265 | 0/016702 | 0/02209 |
| 53 | 0/005236 | 0/019911 | 0/025886 | **1053** | 0/00265 | 0/016702 | 0/02209 |
| 54 | 0/005236 | 0/019911 | 0/025886 | **1054** | 0/00265 | 0/016702 | 0/02209 |
| 55 | 0/005236 | 0/019911 | 0/025886 | **1055** | 0/00265 | 0/016702 | 0/02209 |
| 56 | 0/005236 | 0/019911 | 0/025886 | **1056** | 0/00265 | 0/016702 | 0/02209 |
| 57 | 0/005173 | 0/019034 | 0/025886 | **1057** | 0/00265 | 0/016702 | 0/02209 |
| 58 | 0/005173 | 0/019034 | 0/025886 | **1058** | 0/00265 | 0/016702 | 0/02209 |
| 59 | 0/005173 | 0/019034 | 0/025886 | **1059** | 0/00265 | 0/016702 | 0/02209 |
| 60 | 0/005173 | 0/019034 | 0/025886 | **1060** | 0/00265 | 0/016702 | 0/02209 |
| 61 | 0/00495 | 0/019034 | 0/025886 | **1061** | 0/00265 | 0/016702 | 0/02209 |
| 62 | 0/00495 | 0/019034 | 0/025886 | **1062** | 0/00265 | 0/016702 | 0/02209 |
| 63 | 0/004782 | 0/019034 | 0/025886 | **1063** | 0/00265 | 0/016702 | 0/02209 |
| 64 | 0/004782 | 0/019034 | 0/025886 | **1064** | 0/00265 | 0/016702 | 0/02209 |
| 65 | 0/004782 | 0/019034 | 0/025886 | **1065** | 0/00265 | 0/016702 | 0/02209 |
| 66 | 0/004782 | 0/019034 | 0/025886 | **1066** | 0/00265 | 0/016702 | 0/02209 |
| 67 | 0/004782 | 0/019034 | 0/025886 | **1067** | 0/00265 | 0/016702 | 0/02209 |
| 68 | 0/00471 | 0/019034 | 0/025886 | **1068** | 0/00265 | 0/016702 | 0/02209 |
| 69 | 0/00471 | 0/019034 | 0/025886 | **1069** | 0/00265 | 0/016702 | 0/02209 |
| 70 | 0/004708 | 0/019034 | 0/025886 | **1070** | 0/00265 | 0/016702 | 0/02209 |
| 71 | 0/004708 | 0/019034 | 0/025886 | **1071** | 0/00265 | 0/016702 | 0/02209 |
| 72 | 0/004708 | 0/019034 | 0/025886 | **1072** | 0/00265 | 0/016702 | 0/02209 |
| 73 | 0/004708 | 0/019034 | 0/025886 | **1073** | 0/00265 | 0/016702 | 0/02209 |
| 74 | 0/004708 | 0/019034 | 0/024928 | **1074** | 0/00265 | 0/016702 | 0/02209 |
| 75 | 0/004708 | 0/019034 | 0/024928 | **1075** | 0/00265 | 0/016702 | 0/02209 |
| 76 | 0/004708 | 0/019034 | 0/024928 | **1076** | 0/00265 | 0/016702 | 0/02209 |
| 77 | 0/004708 | 0/019034 | 0/024928 | **1077** | 0/00265 | 0/016702 | 0/02209 |
| 78 | 0/004708 | 0/019034 | 0/024928 | **1078** | 0/00265 | 0/016702 | 0/02209 |
| 79 | 0/004708 | 0/019034 | 0/024928 | **1079** | 0/00265 | 0/016702 | 0/02209 |
| 80 | 0/004708 | 0/019034 | 0/02482 | **1080** | 0/00265 | 0/016702 | 0/02209 |
| 81 | 0/004708 | 0/019034 | 0/02482 | **1081** | 0/00265 | 0/016702 | 0/02209 |
| 82 | 0/004708 | 0/018986 | 0/024283 | **1082** | 0/00265 | 0/016702 | 0/02209 |
| 83 | 0/004708 | 0/018986 | 0/024283 | **1083** | 0/00265 | 0/016702 | 0/02209 |
| 84 | 0/004708 | 0/018986 | 0/024283 | **1084** | 0/00265 | 0/016702 | 0/02209 |
| 85 | 0/004708 | 0/018986 | 0/024283 | **1085** | 0/00265 | 0/016702 | 0/02209 |
| 86 | 0/004708 | 0/018986 | 0/024283 | **1086** | 0/00265 | 0/016702 | 0/02209 |
| 87 | 0/004708 | 0/018986 | 0/024283 | **1087** | 0/00265 | 0/016702 | 0/02209 |
| 88 | 0/004708 | 0/018986 | 0/024283 | **1088** | 0/00265 | 0/016702 | 0/02209 |
| 89 | 0/004708 | 0/018986 | 0/024283 | **1089** | 0/00265 | 0/016702 | 0/02209 |
| 90 | 0/004708 | 0/018986 | 0/024283 | **1090** | 0/00265 | 0/016702 | 0/02209 |
| 91 | 0/004708 | 0/018986 | 0/024283 | **1091** | 0/00265 | 0/016702 | 0/02209 |
| 92 | 0/004708 | 0/018986 | 0/024283 | **1092** | 0/00265 | 0/016702 | 0/02209 |
| 93 | 0/004708 | 0/018986 | 0/024283 | **1093** | 0/00265 | 0/016702 | 0/02209 |
| 94 | 0/004708 | 0/018986 | 0/024283 | **1094** | 0/00265 | 0/016702 | 0/02209 |
| 95 | 0/004708 | 0/018986 | 0/024283 | **1095** | 0/00265 | 0/016702 | 0/02209 |
| 96 | 0/004708 | 0/018986 | 0/024283 | **1096** | 0/00265 | 0/016702 | 0/02209 |
| 97 | 0/004708 | 0/018986 | 0/024283 | **1097** | 0/00265 | 0/016702 | 0/02209 |
| 98 | 0/004708 | 0/018986 | 0/024283 | **1098** | 0/00265 | 0/016702 | 0/02209 |
| 99 | 0/004577 | 0/018986 | 0/024283 | **1099** | 0/00265 | 0/016702 | 0/02209 |
| 100 | 0/004577 | 0/018986 | 0/024283 | **1100** | 0/00265 | 0/016702 | 0/02209 |
| 101 | 0/004577 | 0/018986 | 0/024283 | **1101** | 0/00265 | 0/016702 | 0/02209 |
| 102 | 0/00441 | 0/018986 | 0/024283 | **1102** | 0/00265 | 0/016702 | 0/02209 |
| 103 | 0/00441 | 0/018986 | 0/024283 | **1103** | 0/00265 | 0/016702 | 0/02209 |
| 104 | 0/00441 | 0/018986 | 0/024283 | **1104** | 0/00265 | 0/016702 | 0/02209 |
| 105 | 0/00441 | 0/018986 | 0/024283 | **1105** | 0/00265 | 0/016702 | 0/02209 |
| 106 | 0/00441 | 0/018986 | 0/024283 | **1106** | 0/00265 | 0/016702 | 0/02209 |
| 107 | 0/00441 | 0/018986 | 0/024283 | **1107** | 0/00265 | 0/016702 | 0/02209 |
| 108 | 0/00441 | 0/018986 | 0/024283 | **1108** | 0/00265 | 0/016702 | 0/02209 |
| 109 | 0/00441 | 0/018986 | 0/024283 | **1109** | 0/00265 | 0/016702 | 0/02209 |
| 110 | 0/00441 | 0/018986 | 0/024283 | **1110** | 0/00265 | 0/016702 | 0/02209 |
| 111 | 0/00441 | 0/018986 | 0/024283 | **1111** | 0/00265 | 0/016702 | 0/02209 |
| 112 | 0/00441 | 0/018986 | 0/024283 | **1112** | 0/00265 | 0/016702 | 0/02209 |
| 113 | 0/00441 | 0/018986 | 0/024283 | **1113** | 0/00265 | 0/016702 | 0/02209 |
| 114 | 0/00441 | 0/018986 | 0/024283 | **1114** | 0/00265 | 0/016702 | 0/02209 |
| 115 | 0/00441 | 0/018986 | 0/024283 | **1115** | 0/00265 | 0/016702 | 0/02209 |
| 116 | 0/00441 | 0/018986 | 0/024283 | **1116** | 0/00265 | 0/016702 | 0/02209 |
| 117 | 0/00441 | 0/018986 | 0/024283 | **1117** | 0/00265 | 0/016702 | 0/02209 |
| 118 | 0/00441 | 0/018986 | 0/024283 | **1118** | 0/00265 | 0/016702 | 0/02209 |
| 119 | 0/00441 | 0/018986 | 0/024283 | **1119** | 0/00265 | 0/016702 | 0/02209 |
| 120 | 0/00441 | 0/018749 | 0/024283 | **1120** | 0/00265 | 0/016702 | 0/02209 |
| 121 | 0/00441 | 0/018749 | 0/024283 | **1121** | 0/00265 | 0/016702 | 0/02209 |
| 122 | 0/00441 | 0/018749 | 0/024283 | **1122** | 0/00265 | 0/016702 | 0/02209 |
| 123 | 0/00441 | 0/018719 | 0/024283 | **1123** | 0/00265 | 0/016702 | 0/02209 |
| 124 | 0/00441 | 0/018719 | 0/024283 | **1124** | 0/00265 | 0/016702 | 0/02209 |
| 125 | 0/00441 | 0/018719 | 0/024283 | **1125** | 0/00265 | 0/016702 | 0/02209 |
| 126 | 0/00441 | 0/018719 | 0/024283 | **1126** | 0/00265 | 0/016702 | 0/02209 |
| 127 | 0/00441 | 0/018719 | 0/024283 | **1127** | 0/00265 | 0/016702 | 0/02209 |
| 128 | 0/004372 | 0/018719 | 0/024283 | **1128** | 0/00265 | 0/016702 | 0/02209 |
| 129 | 0/004372 | 0/018719 | 0/02409 | **1129** | 0/00265 | 0/016702 | 0/02209 |
| 130 | 0/004372 | 0/018719 | 0/02409 | **1130** | 0/00265 | 0/016702 | 0/02209 |
| 131 | 0/004372 | 0/018719 | 0/02409 | **1131** | 0/00265 | 0/016702 | 0/02209 |
| 132 | 0/004372 | 0/018719 | 0/02409 | **1132** | 0/00265 | 0/016702 | 0/02209 |
| 133 | 0/004372 | 0/018719 | 0/02409 | **1133** | 0/00265 | 0/016702 | 0/02209 |
| 134 | 0/004372 | 0/018719 | 0/02409 | **1134** | 0/00265 | 0/016702 | 0/02209 |
| 135 | 0/004372 | 0/018719 | 0/02409 | **1135** | 0/00265 | 0/016702 | 0/02209 |
| 136 | 0/004372 | 0/018594 | 0/02409 | **1136** | 0/00265 | 0/016702 | 0/02209 |
| 137 | 0/004372 | 0/018594 | 0/02409 | **1137** | 0/00265 | 0/016702 | 0/02209 |
| 138 | 0/004372 | 0/018594 | 0/02409 | **1138** | 0/00265 | 0/016702 | 0/02209 |
| 139 | 0/003751 | 0/018594 | 0/02409 | **1139** | 0/00265 | 0/016702 | 0/02209 |
| 140 | 0/003751 | 0/018594 | 0/02409 | **1140** | 0/00265 | 0/016702 | 0/02209 |
| 141 | 0/003751 | 0/018594 | 0/02409 | **1141** | 0/00265 | 0/016702 | 0/02209 |
| 142 | 0/003751 | 0/018594 | 0/02409 | **1142** | 0/00265 | 0/016702 | 0/02209 |
| 143 | 0/003751 | 0/017671 | 0/02409 | **1143** | 0/00265 | 0/016702 | 0/02209 |
| 144 | 0/003751 | 0/017671 | 0/02409 | **1144** | 0/00265 | 0/016702 | 0/02209 |
| 145 | 0/003751 | 0/017671 | 0/022481 | **1145** | 0/00265 | 0/016702 | 0/02209 |
| 146 | 0/003751 | 0/017671 | 0/022481 | **1146** | 0/00265 | 0/016702 | 0/02209 |
| 147 | 0/003751 | 0/017671 | 0/022481 | **1147** | 0/00265 | 0/016702 | 0/02209 |
| 148 | 0/003751 | 0/017671 | 0/022481 | **1148** | 0/00265 | 0/016702 | 0/02209 |
| 149 | 0/003751 | 0/017671 | 0/022481 | **1149** | 0/00265 | 0/016702 | 0/02209 |
| 150 | 0/003751 | 0/017671 | 0/022481 | **1150** | 0/00265 | 0/016702 | 0/02209 |
| 151 | 0/003751 | 0/017671 | 0/022481 | **1151** | 0/00265 | 0/016702 | 0/02209 |
| 152 | 0/003303 | 0/017671 | 0/022481 | **1152** | 0/00265 | 0/016702 | 0/02209 |
| 153 | 0/003303 | 0/017671 | 0/022481 | **1153** | 0/00265 | 0/016702 | 0/02209 |
| 154 | 0/003303 | 0/017671 | 0/022481 | **1154** | 0/00265 | 0/016702 | 0/02209 |
| 155 | 0/003303 | 0/017671 | 0/022481 | **1155** | 0/00265 | 0/016702 | 0/02209 |
| 156 | 0/003303 | 0/017671 | 0/022481 | **1156** | 0/00265 | 0/016702 | 0/02209 |
| 157 | 0/003303 | 0/017671 | 0/022481 | **1157** | 0/00265 | 0/016702 | 0/02209 |
| 158 | 0/003303 | 0/017671 | 0/022481 | **1158** | 0/00265 | 0/016702 | 0/02209 |
| 159 | 0/003303 | 0/017671 | 0/022481 | **1159** | 0/00265 | 0/016702 | 0/02209 |
| 160 | 0/003303 | 0/017671 | 0/022481 | **1160** | 0/00265 | 0/016702 | 0/02209 |
| 161 | 0/003303 | 0/017671 | 0/022481 | **1161** | 0/00265 | 0/016702 | 0/02209 |
| 162 | 0/003303 | 0/017671 | 0/022481 | **1162** | 0/00265 | 0/016702 | 0/02209 |
| 163 | 0/003303 | 0/017671 | 0/022481 | **1163** | 0/00265 | 0/016702 | 0/02209 |
| 164 | 0/003303 | 0/017671 | 0/022481 | **1164** | 0/00265 | 0/016702 | 0/02209 |
| 165 | 0/003303 | 0/017671 | 0/022481 | **1165** | 0/00265 | 0/016702 | 0/02209 |
| 166 | 0/003303 | 0/017671 | 0/022481 | **1166** | 0/00265 | 0/016702 | 0/02209 |
| 167 | 0/003303 | 0/017671 | 0/022481 | **1167** | 0/00265 | 0/016702 | 0/02209 |
| 168 | 0/003303 | 0/017671 | 0/022481 | **1168** | 0/00265 | 0/016702 | 0/02209 |
| 169 | 0/003303 | 0/017671 | 0/022481 | **1169** | 0/00265 | 0/016702 | 0/02209 |
| 170 | 0/003303 | 0/017671 | 0/022481 | **1170** | 0/00265 | 0/016702 | 0/02209 |
| 171 | 0/003303 | 0/017671 | 0/022481 | **1171** | 0/00265 | 0/016702 | 0/02209 |
| 172 | 0/003303 | 0/017671 | 0/022481 | **1172** | 0/00265 | 0/016702 | 0/02209 |
| 173 | 0/003303 | 0/017671 | 0/022481 | **1173** | 0/00265 | 0/016702 | 0/02209 |
| 174 | 0/003303 | 0/017671 | 0/022481 | **1174** | 0/00265 | 0/016702 | 0/02209 |
| 175 | 0/003303 | 0/017671 | 0/022481 | **1175** | 0/00265 | 0/016702 | 0/02209 |
| 176 | 0/003303 | 0/017671 | 0/022481 | **1176** | 0/00265 | 0/016702 | 0/02209 |
| 177 | 0/003303 | 0/017671 | 0/022481 | **1177** | 0/00265 | 0/016702 | 0/02209 |
| 178 | 0/003303 | 0/017671 | 0/022481 | **1178** | 0/00265 | 0/016702 | 0/02209 |
| 179 | 0/003303 | 0/017671 | 0/022481 | **1179** | 0/00265 | 0/016702 | 0/02209 |
| 180 | 0/003303 | 0/017671 | 0/022481 | **1180** | 0/00265 | 0/016702 | 0/02209 |
| 181 | 0/003303 | 0/017671 | 0/022481 | **1181** | 0/00265 | 0/016702 | 0/02209 |
| 182 | 0/003303 | 0/017671 | 0/022481 | **1182** | 0/00265 | 0/016702 | 0/02209 |
| 183 | 0/003303 | 0/017671 | 0/022481 | **1183** | 0/00265 | 0/016702 | 0/02209 |
| 184 | 0/003303 | 0/017671 | 0/022481 | **1184** | 0/00265 | 0/016702 | 0/02209 |
| 185 | 0/003303 | 0/017671 | 0/022481 | **1185** | 0/00265 | 0/016702 | 0/02209 |
| 186 | 0/003303 | 0/017671 | 0/022481 | **1186** | 0/00265 | 0/016702 | 0/02209 |
| 187 | 0/003303 | 0/017671 | 0/022481 | **1187** | 0/00265 | 0/016702 | 0/02209 |
| 188 | 0/003303 | 0/017671 | 0/022481 | **1188** | 0/00265 | 0/016702 | 0/02209 |
| 189 | 0/003303 | 0/017671 | 0/022481 | **1189** | 0/00265 | 0/016702 | 0/02209 |
| 190 | 0/003303 | 0/017671 | 0/022481 | **1190** | 0/00265 | 0/016702 | 0/02209 |
| 191 | 0/003303 | 0/017671 | 0/022481 | **1191** | 0/00265 | 0/016702 | 0/02209 |
| 192 | 0/003303 | 0/017671 | 0/022481 | **1192** | 0/00265 | 0/016702 | 0/02209 |
| 193 | 0/003303 | 0/017671 | 0/022481 | **1193** | 0/00265 | 0/016702 | 0/02209 |
| 194 | 0/003303 | 0/017671 | 0/022481 | **1194** | 0/00265 | 0/016702 | 0/02209 |
| 195 | 0/003303 | 0/017671 | 0/022481 | **1195** | 0/00265 | 0/016702 | 0/02209 |
| 196 | 0/003303 | 0/017671 | 0/022481 | **1196** | 0/00265 | 0/016702 | 0/02209 |
| 197 | 0/003303 | 0/017671 | 0/022481 | **1197** | 0/00265 | 0/016702 | 0/02209 |
| 198 | 0/003303 | 0/017671 | 0/022481 | **1198** | 0/00265 | 0/016702 | 0/02209 |
| 199 | 0/003303 | 0/017671 | 0/022481 | **1199** | 0/00265 | 0/016702 | 0/02209 |
| 200 | 0/003303 | 0/017671 | 0/022481 | **1200** | 0/00265 | 0/016702 | 0/02209 |
| 201 | 0/003303 | 0/017671 | 0/022481 | **1201** | 0/00265 | 0/016702 | 0/02209 |
| 202 | 0/003303 | 0/017671 | 0/022481 | **1202** | 0/00265 | 0/016702 | 0/02209 |
| 203 | 0/003303 | 0/017671 | 0/022481 | **1203** | 0/00265 | 0/016702 | 0/02209 |
| 204 | 0/003303 | 0/017671 | 0/022481 | **1204** | 0/00265 | 0/016702 | 0/02209 |
| 205 | 0/003303 | 0/017671 | 0/022481 | **1205** | 0/00265 | 0/016702 | 0/02209 |
| 206 | 0/003303 | 0/017671 | 0/022481 | **1206** | 0/00265 | 0/016702 | 0/02209 |
| 207 | 0/003303 | 0/017671 | 0/022481 | **1207** | 0/00265 | 0/016702 | 0/02209 |
| 208 | 0/003303 | 0/017671 | 0/022481 | **1208** | 0/00265 | 0/016702 | 0/02209 |
| 209 | 0/003303 | 0/017671 | 0/022481 | **1209** | 0/00265 | 0/016702 | 0/02209 |
| 210 | 0/003303 | 0/017671 | 0/022481 | **1210** | 0/00265 | 0/016702 | 0/02209 |
| 211 | 0/003303 | 0/017671 | 0/022481 | **1211** | 0/00265 | 0/016702 | 0/02209 |
| 212 | 0/003303 | 0/017671 | 0/022481 | **1212** | 0/00265 | 0/016702 | 0/02209 |
| 213 | 0/003303 | 0/017671 | 0/022481 | **1213** | 0/00265 | 0/016702 | 0/02209 |
| 214 | 0/003303 | 0/017671 | 0/022481 | **1214** | 0/00265 | 0/016702 | 0/02209 |
| 215 | 0/003303 | 0/017671 | 0/022481 | **1215** | 0/00265 | 0/016702 | 0/02209 |
| 216 | 0/003303 | 0/017671 | 0/022481 | **1216** | 0/00265 | 0/016702 | 0/02209 |
| 217 | 0/003303 | 0/017671 | 0/022481 | **1217** | 0/00265 | 0/016702 | 0/02209 |
| 218 | 0/003303 | 0/017671 | 0/022481 | **1218** | 0/00265 | 0/016702 | 0/02209 |
| 219 | 0/003303 | 0/017671 | 0/022481 | **1219** | 0/00265 | 0/016702 | 0/02209 |
| 220 | 0/003303 | 0/017671 | 0/022481 | **1220** | 0/00265 | 0/016702 | 0/02209 |
| 221 | 0/003303 | 0/017671 | 0/022481 | **1221** | 0/00265 | 0/016702 | 0/02209 |
| 222 | 0/003303 | 0/017671 | 0/022481 | **1222** | 0/00265 | 0/016702 | 0/02209 |
| 223 | 0/003303 | 0/017671 | 0/022481 | **1223** | 0/00265 | 0/016702 | 0/02209 |
| 224 | 0/003303 | 0/017671 | 0/022481 | **1224** | 0/00265 | 0/016702 | 0/02209 |
| 225 | 0/003303 | 0/017671 | 0/022481 | **1225** | 0/00265 | 0/016702 | 0/02209 |
| 226 | 0/003303 | 0/017671 | 0/022481 | **1226** | 0/00265 | 0/016702 | 0/02209 |
| 227 | 0/003303 | 0/017671 | 0/022481 | **1227** | 0/00265 | 0/016702 | 0/02209 |
| 228 | 0/003303 | 0/017671 | 0/022481 | **1228** | 0/00265 | 0/016702 | 0/02209 |
| 229 | 0/003303 | 0/017671 | 0/022481 | **1229** | 0/00265 | 0/016702 | 0/02209 |
| 230 | 0/003303 | 0/017671 | 0/022481 | **1230** | 0/00265 | 0/016702 | 0/02209 |
| 231 | 0/003303 | 0/017671 | 0/022481 | **1231** | 0/00265 | 0/016702 | 0/02209 |
| 232 | 0/003303 | 0/017671 | 0/022481 | **1232** | 0/00265 | 0/016702 | 0/02209 |
| 233 | 0/003303 | 0/017671 | 0/022481 | **1233** | 0/00265 | 0/016702 | 0/02209 |
| 234 | 0/003303 | 0/017671 | 0/022481 | **1234** | 0/00265 | 0/016702 | 0/02209 |
| 235 | 0/003303 | 0/017671 | 0/022481 | **1235** | 0/00265 | 0/016702 | 0/02209 |
| 236 | 0/003303 | 0/017671 | 0/022481 | **1236** | 0/00265 | 0/016702 | 0/02209 |
| 237 | 0/003303 | 0/017671 | 0/022481 | **1237** | 0/00265 | 0/016702 | 0/02209 |
| 238 | 0/003303 | 0/017671 | 0/022481 | **1238** | 0/00265 | 0/016702 | 0/02209 |
| 239 | 0/003303 | 0/017023 | 0/022481 | **1239** | 0/00265 | 0/016702 | 0/02209 |
| 240 | 0/003303 | 0/017023 | 0/022481 | **1240** | 0/00265 | 0/016702 | 0/02209 |
| 241 | 0/003303 | 0/017023 | 0/022481 | **1241** | 0/00265 | 0/016702 | 0/02209 |
| 242 | 0/003303 | 0/017023 | 0/022481 | **1242** | 0/00265 | 0/016702 | 0/02209 |
| 243 | 0/003303 | 0/017023 | 0/022481 | **1243** | 0/00265 | 0/016702 | 0/02209 |
| 244 | 0/003303 | 0/017023 | 0/022481 | **1244** | 0/00265 | 0/016702 | 0/02209 |
| 245 | 0/003303 | 0/017023 | 0/022481 | **1245** | 0/00265 | 0/016702 | 0/02209 |
| 246 | 0/003303 | 0/017023 | 0/022481 | **1246** | 0/00265 | 0/016702 | 0/02209 |
| 247 | 0/003303 | 0/017023 | 0/022481 | **1247** | 0/00265 | 0/016702 | 0/02209 |
| 248 | 0/003303 | 0/017023 | 0/022481 | **1248** | 0/00265 | 0/016702 | 0/02209 |
| 249 | 0/003303 | 0/017023 | 0/022481 | **1249** | 0/00265 | 0/016702 | 0/02209 |
| 250 | 0/003303 | 0/017023 | 0/022481 | **1250** | 0/00265 | 0/016702 | 0/02209 |
| 251 | 0/003303 | 0/017023 | 0/022481 | **1251** | 0/00265 | 0/016702 | 0/02209 |
| 252 | 0/003303 | 0/017023 | 0/022481 | **1252** | 0/00265 | 0/016702 | 0/02209 |
| 253 | 0/003303 | 0/017023 | 0/022481 | **1253** | 0/00265 | 0/016702 | 0/02209 |
| 254 | 0/003303 | 0/017023 | 0/022481 | **1254** | 0/00265 | 0/016702 | 0/02209 |
| 255 | 0/003303 | 0/017023 | 0/022481 | **1255** | 0/00265 | 0/016702 | 0/02209 |
| 256 | 0/003303 | 0/017023 | 0/022481 | **1256** | 0/00265 | 0/016702 | 0/02209 |
| 257 | 0/003303 | 0/017023 | 0/022481 | **1257** | 0/00265 | 0/016702 | 0/02209 |
| 258 | 0/003303 | 0/017023 | 0/022481 | **1258** | 0/00265 | 0/016702 | 0/02209 |
| 259 | 0/003303 | 0/017023 | 0/022481 | **1259** | 0/00265 | 0/016702 | 0/02209 |
| 260 | 0/003303 | 0/017023 | 0/022481 | **1260** | 0/00265 | 0/016702 | 0/02209 |
| 261 | 0/003303 | 0/017023 | 0/022481 | **1261** | 0/00265 | 0/016702 | 0/02209 |
| 262 | 0/003303 | 0/017023 | 0/022481 | **1262** | 0/00265 | 0/016702 | 0/02209 |
| 263 | 0/003303 | 0/017023 | 0/022481 | **1263** | 0/00265 | 0/016702 | 0/02209 |
| 264 | 0/003303 | 0/017023 | 0/022481 | **1264** | 0/00265 | 0/016702 | 0/02209 |
| 265 | 0/003303 | 0/017023 | 0/022481 | **1265** | 0/00265 | 0/016702 | 0/02209 |
| 266 | 0/003303 | 0/017023 | 0/022481 | **1266** | 0/00265 | 0/016702 | 0/02209 |
| 267 | 0/003303 | 0/017023 | 0/022481 | **1267** | 0/00265 | 0/016702 | 0/02209 |
| 268 | 0/003303 | 0/017023 | 0/022481 | **1268** | 0/00265 | 0/016702 | 0/02209 |
| 269 | 0/003303 | 0/017023 | 0/022481 | **1269** | 0/00265 | 0/016702 | 0/02209 |
| 270 | 0/003303 | 0/017023 | 0/022481 | **1270** | 0/00265 | 0/016702 | 0/02209 |
| 271 | 0/003303 | 0/017023 | 0/022481 | **1271** | 0/00265 | 0/016702 | 0/02209 |
| 272 | 0/003303 | 0/017023 | 0/022481 | **1272** | 0/00265 | 0/016702 | 0/02209 |
| 273 | 0/003303 | 0/017023 | 0/022481 | **1273** | 0/00265 | 0/016702 | 0/02209 |
| 274 | 0/003303 | 0/017023 | 0/022481 | **1274** | 0/00265 | 0/016702 | 0/02209 |
| 275 | 0/003303 | 0/017023 | 0/022481 | **1275** | 0/00265 | 0/016702 | 0/02209 |
| 276 | 0/003303 | 0/017023 | 0/022481 | **1276** | 0/00265 | 0/016702 | 0/02209 |
| 277 | 0/003303 | 0/017023 | 0/022481 | **1277** | 0/00265 | 0/016702 | 0/02209 |
| 278 | 0/003303 | 0/017023 | 0/022481 | **1278** | 0/00265 | 0/016702 | 0/02209 |
| 279 | 0/003303 | 0/017023 | 0/022481 | **1279** | 0/00265 | 0/016702 | 0/02209 |
| 280 | 0/003303 | 0/017023 | 0/022481 | **1280** | 0/00265 | 0/016702 | 0/02209 |
| 281 | 0/003303 | 0/017023 | 0/022481 | **1281** | 0/00265 | 0/016702 | 0/02209 |
| 282 | 0/003303 | 0/017023 | 0/022481 | **1282** | 0/00265 | 0/016702 | 0/02209 |
| 283 | 0/003303 | 0/017023 | 0/022481 | **1283** | 0/00265 | 0/016702 | 0/02209 |
| 284 | 0/003303 | 0/017023 | 0/022481 | **1284** | 0/00265 | 0/016702 | 0/02209 |
| 285 | 0/003191 | 0/017023 | 0/022481 | **1285** | 0/00265 | 0/016702 | 0/02209 |
| 286 | 0/003191 | 0/017023 | 0/022481 | **1286** | 0/00265 | 0/016702 | 0/02209 |
| 287 | 0/003191 | 0/017023 | 0/022481 | **1287** | 0/00265 | 0/016702 | 0/02209 |
| 288 | 0/003191 | 0/017023 | 0/022481 | **1288** | 0/00265 | 0/016702 | 0/02209 |
| 289 | 0/003191 | 0/017023 | 0/022481 | **1289** | 0/00265 | 0/016702 | 0/02209 |
| 290 | 0/003191 | 0/017023 | 0/022481 | **1290** | 0/00265 | 0/016702 | 0/02209 |
| 291 | 0/003191 | 0/017023 | 0/022481 | **1291** | 0/00265 | 0/016702 | 0/02209 |
| 292 | 0/003191 | 0/017023 | 0/022481 | **1292** | 0/00265 | 0/016702 | 0/02209 |
| 293 | 0/003191 | 0/017023 | 0/022481 | **1293** | 0/00265 | 0/016702 | 0/02209 |
| 294 | 0/003191 | 0/017023 | 0/022481 | **1294** | 0/00265 | 0/016702 | 0/02209 |
| 295 | 0/003191 | 0/017023 | 0/022481 | **1295** | 0/00265 | 0/016702 | 0/02209 |
| 296 | 0/003191 | 0/017023 | 0/022481 | **1296** | 0/00265 | 0/016702 | 0/02209 |
| 297 | 0/003191 | 0/017023 | 0/022481 | **1297** | 0/00265 | 0/016702 | 0/02209 |
| 298 | 0/003191 | 0/017023 | 0/022481 | **1298** | 0/00265 | 0/016702 | 0/02209 |
| 299 | 0/003191 | 0/017023 | 0/022481 | **1299** | 0/00265 | 0/016702 | 0/02209 |
| 300 | 0/003191 | 0/017023 | 0/022481 | **1300** | 0/00265 | 0/016702 | 0/02209 |
| 301 | 0/003191 | 0/017023 | 0/022481 | **1301** | 0/00265 | 0/016702 | 0/02209 |
| 302 | 0/003191 | 0/017023 | 0/022481 | **1302** | 0/00265 | 0/016702 | 0/02209 |
| 303 | 0/003191 | 0/017023 | 0/022481 | **1303** | 0/00265 | 0/016702 | 0/02209 |
| 304 | 0/003191 | 0/017023 | 0/022481 | **1304** | 0/00265 | 0/016702 | 0/02209 |
| 305 | 0/003191 | 0/017023 | 0/022481 | **1305** | 0/00265 | 0/016702 | 0/02209 |
| 306 | 0/003191 | 0/017023 | 0/022481 | **1306** | 0/00265 | 0/016702 | 0/02209 |
| 307 | 0/003191 | 0/017023 | 0/022481 | **1307** | 0/00265 | 0/016702 | 0/02209 |
| 308 | 0/003191 | 0/017023 | 0/022481 | **1308** | 0/00265 | 0/016702 | 0/02209 |
| 309 | 0/003191 | 0/017023 | 0/022481 | **1309** | 0/00265 | 0/016702 | 0/02209 |
| 310 | 0/003191 | 0/017023 | 0/022481 | **1310** | 0/00265 | 0/016702 | 0/02209 |
| 311 | 0/003191 | 0/017023 | 0/022481 | **1311** | 0/00265 | 0/016702 | 0/02209 |
| 312 | 0/003191 | 0/017023 | 0/022481 | **1312** | 0/00265 | 0/016702 | 0/02209 |
| 313 | 0/003191 | 0/017023 | 0/022481 | **1313** | 0/00265 | 0/016702 | 0/02209 |
| 314 | 0/003191 | 0/017023 | 0/022481 | **1314** | 0/00265 | 0/016702 | 0/02209 |
| 315 | 0/003191 | 0/017023 | 0/022481 | **1315** | 0/00265 | 0/016702 | 0/02209 |
| 316 | 0/003191 | 0/017023 | 0/022481 | **1316** | 0/00265 | 0/016702 | 0/02209 |
| 317 | 0/003191 | 0/017023 | 0/022481 | **1317** | 0/00265 | 0/016702 | 0/02209 |
| 318 | 0/003191 | 0/017023 | 0/022481 | **1318** | 0/00265 | 0/016702 | 0/02209 |
| 319 | 0/003191 | 0/016967 | 0/022481 | **1319** | 0/00265 | 0/016702 | 0/02209 |
| 320 | 0/003191 | 0/016967 | 0/022481 | **1320** | 0/00265 | 0/016702 | 0/02209 |
| 321 | 0/003191 | 0/016967 | 0/022481 | **1321** | 0/00265 | 0/016702 | 0/02209 |
| 322 | 0/003191 | 0/016967 | 0/022481 | **1322** | 0/00265 | 0/016702 | 0/02209 |
| 323 | 0/003191 | 0/016967 | 0/022481 | **1323** | 0/00265 | 0/016702 | 0/02209 |
| 324 | 0/003191 | 0/016967 | 0/022481 | **1324** | 0/00265 | 0/016702 | 0/02209 |
| 325 | 0/003191 | 0/016967 | 0/022481 | **1325** | 0/00265 | 0/016702 | 0/02209 |
| 326 | 0/003191 | 0/016967 | 0/022481 | **1326** | 0/00265 | 0/016702 | 0/02209 |
| 327 | 0/003191 | 0/016967 | 0/022481 | **1327** | 0/00265 | 0/016702 | 0/02209 |
| 328 | 0/003191 | 0/016967 | 0/022481 | **1328** | 0/00265 | 0/016702 | 0/02209 |
| 329 | 0/003191 | 0/016967 | 0/022481 | **1329** | 0/00265 | 0/016702 | 0/02209 |
| 330 | 0/003191 | 0/016967 | 0/022481 | **1330** | 0/00265 | 0/016702 | 0/02209 |
| 331 | 0/003191 | 0/016967 | 0/022481 | **1331** | 0/00265 | 0/016702 | 0/02209 |
| 332 | 0/003191 | 0/016967 | 0/022481 | **1332** | 0/00265 | 0/016702 | 0/02209 |
| 333 | 0/003191 | 0/016967 | 0/022481 | **1333** | 0/00265 | 0/016702 | 0/02209 |
| 334 | 0/003191 | 0/016967 | 0/022481 | **1334** | 0/00265 | 0/016702 | 0/02209 |
| 335 | 0/003191 | 0/016967 | 0/022481 | **1335** | 0/00265 | 0/016702 | 0/02209 |
| 336 | 0/003191 | 0/016967 | 0/022481 | **1336** | 0/00265 | 0/016702 | 0/02209 |
| 337 | 0/003191 | 0/016967 | 0/022481 | **1337** | 0/00265 | 0/016702 | 0/02209 |
| 338 | 0/003191 | 0/016967 | 0/022481 | **1338** | 0/00265 | 0/016702 | 0/02209 |
| 339 | 0/003191 | 0/016967 | 0/022481 | **1339** | 0/00265 | 0/016702 | 0/02209 |
| 340 | 0/003191 | 0/016967 | 0/022481 | **1340** | 0/00265 | 0/016702 | 0/02209 |
| 341 | 0/003191 | 0/016967 | 0/022481 | **1341** | 0/00265 | 0/016702 | 0/02209 |
| 342 | 0/003191 | 0/016967 | 0/022481 | **1342** | 0/00265 | 0/016702 | 0/02209 |
| 343 | 0/003191 | 0/016967 | 0/022481 | **1343** | 0/00265 | 0/016702 | 0/02209 |
| 344 | 0/003191 | 0/016967 | 0/022481 | **1344** | 0/00265 | 0/016702 | 0/02209 |
| 345 | 0/003191 | 0/016967 | 0/022481 | **1345** | 0/00265 | 0/016702 | 0/02209 |
| 346 | 0/003191 | 0/016967 | 0/022481 | **1346** | 0/00265 | 0/016702 | 0/02209 |
| 347 | 0/003191 | 0/016967 | 0/022481 | **1347** | 0/00265 | 0/016702 | 0/02209 |
| 348 | 0/003191 | 0/016967 | 0/022481 | **1348** | 0/00265 | 0/016702 | 0/02209 |
| 349 | 0/003191 | 0/016967 | 0/022481 | **1349** | 0/00265 | 0/016702 | 0/02209 |
| 350 | 0/003191 | 0/016967 | 0/022481 | **1350** | 0/00265 | 0/016702 | 0/02209 |
| 351 | 0/003191 | 0/016967 | 0/022481 | **1351** | 0/00265 | 0/016702 | 0/02209 |
| 352 | 0/003191 | 0/016967 | 0/022481 | **1352** | 0/00265 | 0/016702 | 0/02209 |
| 353 | 0/003191 | 0/016967 | 0/022481 | **1353** | 0/00265 | 0/016702 | 0/02209 |
| 354 | 0/003191 | 0/016967 | 0/022481 | **1354** | 0/00265 | 0/016702 | 0/02209 |
| 355 | 0/003191 | 0/016967 | 0/022481 | **1355** | 0/00265 | 0/016702 | 0/02209 |
| 356 | 0/003191 | 0/016967 | 0/022481 | **1356** | 0/00265 | 0/016702 | 0/02209 |
| 357 | 0/003191 | 0/016967 | 0/022481 | **1357** | 0/002638 | 0/016702 | 0/02209 |
| 358 | 0/003191 | 0/016967 | 0/022481 | **1358** | 0/002638 | 0/016702 | 0/02209 |
| 359 | 0/003191 | 0/016967 | 0/022481 | **1359** | 0/002638 | 0/016702 | 0/02209 |
| 360 | 0/003191 | 0/016967 | 0/022481 | **1360** | 0/002638 | 0/016702 | 0/02209 |
| 361 | 0/003191 | 0/016967 | 0/022481 | **1361** | 0/002638 | 0/016702 | 0/02209 |
| 362 | 0/003191 | 0/016967 | 0/022481 | **1362** | 0/002638 | 0/016702 | 0/02209 |
| 363 | 0/003191 | 0/016967 | 0/022481 | **1363** | 0/002638 | 0/016702 | 0/02209 |
| 364 | 0/003191 | 0/016967 | 0/022481 | **1364** | 0/002638 | 0/016702 | 0/02209 |
| 365 | 0/003191 | 0/016967 | 0/022481 | **1365** | 0/002638 | 0/016702 | 0/02209 |
| 366 | 0/003191 | 0/016967 | 0/022481 | **1366** | 0/002638 | 0/016702 | 0/02209 |
| 367 | 0/003191 | 0/016967 | 0/022481 | **1367** | 0/002638 | 0/016702 | 0/02209 |
| 368 | 0/003191 | 0/016967 | 0/022481 | **1368** | 0/002638 | 0/016702 | 0/02209 |
| 369 | 0/003191 | 0/016967 | 0/022481 | **1369** | 0/002638 | 0/016702 | 0/02209 |
| 370 | 0/003191 | 0/016967 | 0/022481 | **1370** | 0/002638 | 0/016702 | 0/02209 |
| 371 | 0/003191 | 0/016967 | 0/022481 | **1371** | 0/002638 | 0/016702 | 0/02209 |
| 372 | 0/003191 | 0/016967 | 0/022481 | **1372** | 0/002638 | 0/016702 | 0/02209 |
| 373 | 0/003191 | 0/016967 | 0/022481 | **1373** | 0/002632 | 0/016702 | 0/02209 |
| 374 | 0/003191 | 0/016967 | 0/022481 | **1374** | 0/002632 | 0/016702 | 0/02209 |
| 375 | 0/003191 | 0/016967 | 0/022481 | **1375** | 0/002632 | 0/016348 | 0/02209 |
| 376 | 0/003191 | 0/016967 | 0/022481 | **1376** | 0/002632 | 0/016348 | 0/02209 |
| 377 | 0/003191 | 0/016967 | 0/022481 | **1377** | 0/002632 | 0/016348 | 0/02209 |
| 378 | 0/003191 | 0/016967 | 0/022481 | **1378** | 0/002632 | 0/016348 | 0/02209 |
| 379 | 0/003191 | 0/016967 | 0/022481 | **1379** | 0/002632 | 0/016348 | 0/02209 |
| 380 | 0/003191 | 0/016967 | 0/022481 | **1380** | 0/002632 | 0/016348 | 0/02209 |
| 381 | 0/003191 | 0/016967 | 0/022481 | **1381** | 0/002632 | 0/016348 | 0/02209 |
| 382 | 0/003191 | 0/016967 | 0/022481 | **1382** | 0/002632 | 0/016348 | 0/02209 |
| 383 | 0/003191 | 0/016967 | 0/022481 | **1383** | 0/002632 | 0/016348 | 0/02209 |
| 384 | 0/003191 | 0/016967 | 0/022481 | **1384** | 0/002632 | 0/016348 | 0/02209 |
| 385 | 0/003191 | 0/016967 | 0/022481 | **1385** | 0/002632 | 0/016348 | 0/02209 |
| 386 | 0/003191 | 0/016967 | 0/022481 | **1386** | 0/002632 | 0/016348 | 0/02209 |
| 387 | 0/003191 | 0/016967 | 0/022481 | **1387** | 0/002632 | 0/016348 | 0/02209 |
| 388 | 0/003191 | 0/016967 | 0/022481 | **1388** | 0/002632 | 0/016348 | 0/02209 |
| 389 | 0/003191 | 0/016967 | 0/022481 | **1389** | 0/002632 | 0/016348 | 0/02209 |
| 390 | 0/003191 | 0/016967 | 0/022481 | **1390** | 0/002632 | 0/016348 | 0/02209 |
| 391 | 0/003191 | 0/016967 | 0/022481 | **1391** | 0/002632 | 0/016348 | 0/02209 |
| 392 | 0/003191 | 0/016967 | 0/022481 | **1392** | 0/002632 | 0/016348 | 0/02209 |
| 393 | 0/003191 | 0/016967 | 0/022481 | **1393** | 0/002632 | 0/016348 | 0/02209 |
| 394 | 0/003191 | 0/016967 | 0/022481 | **1394** | 0/002632 | 0/016348 | 0/02209 |
| 395 | 0/003191 | 0/016967 | 0/022481 | **1395** | 0/002632 | 0/016348 | 0/02209 |
| 396 | 0/003191 | 0/016967 | 0/022481 | **1396** | 0/002632 | 0/016348 | 0/02209 |
| 397 | 0/003191 | 0/016967 | 0/022481 | **1397** | 0/002632 | 0/016348 | 0/02209 |
| 398 | 0/003191 | 0/016967 | 0/022481 | **1398** | 0/002632 | 0/016348 | 0/02209 |
| 399 | 0/003191 | 0/016967 | 0/022481 | **1399** | 0/002632 | 0/016348 | 0/02209 |
| 400 | 0/003191 | 0/016967 | 0/022481 | **1400** | 0/002632 | 0/016348 | 0/02209 |
| 401 | 0/003191 | 0/016967 | 0/022481 | **1401** | 0/002632 | 0/016348 | 0/02209 |
| 402 | 0/003191 | 0/016967 | 0/022481 | **1402** | 0/002632 | 0/016348 | 0/02209 |
| 403 | 0/003191 | 0/016967 | 0/022481 | **1403** | 0/002632 | 0/016348 | 0/02209 |
| 404 | 0/003191 | 0/016967 | 0/022481 | **1404** | 0/002632 | 0/016348 | 0/02209 |
| 405 | 0/003191 | 0/016967 | 0/022481 | **1405** | 0/002632 | 0/016348 | 0/02209 |
| 406 | 0/003191 | 0/016967 | 0/022481 | **1406** | 0/002632 | 0/016348 | 0/02209 |
| 407 | 0/003191 | 0/016967 | 0/022481 | **1407** | 0/002632 | 0/016348 | 0/02209 |
| 408 | 0/003191 | 0/016967 | 0/022481 | **1408** | 0/002632 | 0/016348 | 0/021904 |
| 409 | 0/003191 | 0/016967 | 0/022481 | **1409** | 0/002632 | 0/016348 | 0/021904 |
| 410 | 0/003191 | 0/016967 | 0/022481 | **1410** | 0/002632 | 0/016348 | 0/021904 |
| 411 | 0/003191 | 0/016967 | 0/022481 | **1411** | 0/002632 | 0/016348 | 0/021904 |
| 412 | 0/003191 | 0/016967 | 0/022481 | **1412** | 0/002632 | 0/016348 | 0/021904 |
| 413 | 0/003191 | 0/016967 | 0/022481 | **1413** | 0/002632 | 0/016348 | 0/021904 |
| 414 | 0/003191 | 0/016967 | 0/022481 | **1414** | 0/002632 | 0/016348 | 0/021904 |
| 415 | 0/003191 | 0/016967 | 0/022481 | **1415** | 0/002632 | 0/016348 | 0/021904 |
| 416 | 0/003191 | 0/016967 | 0/022481 | **1416** | 0/002632 | 0/016348 | 0/021904 |
| 417 | 0/003191 | 0/016967 | 0/022481 | **1417** | 0/002632 | 0/016348 | 0/021904 |
| 418 | 0/003191 | 0/016967 | 0/022481 | **1418** | 0/002632 | 0/016348 | 0/021904 |
| 419 | 0/003191 | 0/016967 | 0/022481 | **1419** | 0/002632 | 0/016348 | 0/021904 |
| 420 | 0/003191 | 0/016967 | 0/022481 | **1420** | 0/002632 | 0/016348 | 0/021904 |
| 421 | 0/003191 | 0/016967 | 0/022481 | **1421** | 0/002632 | 0/016348 | 0/021904 |
| 422 | 0/003191 | 0/016967 | 0/022481 | **1422** | 0/002632 | 0/016348 | 0/021904 |
| 423 | 0/003191 | 0/016967 | 0/022481 | **1423** | 0/002632 | 0/016348 | 0/021904 |
| 424 | 0/003191 | 0/016967 | 0/022481 | **1424** | 0/002632 | 0/016348 | 0/021904 |
| 425 | 0/003191 | 0/016967 | 0/022481 | **1425** | 0/002632 | 0/016348 | 0/021904 |
| 426 | 0/003191 | 0/016967 | 0/022481 | **1426** | 0/002632 | 0/016348 | 0/021904 |
| 427 | 0/003191 | 0/016967 | 0/022481 | **1427** | 0/002632 | 0/016348 | 0/021904 |
| 428 | 0/003191 | 0/016967 | 0/022481 | **1428** | 0/002632 | 0/016348 | 0/021904 |
| 429 | 0/00317 | 0/016967 | 0/022481 | **1429** | 0/002632 | 0/016348 | 0/021904 |
| 430 | 0/00317 | 0/016967 | 0/022481 | **1430** | 0/002632 | 0/016348 | 0/021904 |
| 431 | 0/00317 | 0/016967 | 0/022481 | **1431** | 0/002632 | 0/016348 | 0/021904 |
| 432 | 0/00317 | 0/016967 | 0/022481 | **1432** | 0/002632 | 0/016348 | 0/021904 |
| 433 | 0/00317 | 0/016967 | 0/022481 | **1433** | 0/002632 | 0/016348 | 0/021904 |
| 434 | 0/00317 | 0/016967 | 0/022481 | **1434** | 0/002632 | 0/016348 | 0/021904 |
| 435 | 0/00317 | 0/016967 | 0/022481 | **1435** | 0/002632 | 0/016348 | 0/021904 |
| 436 | 0/00317 | 0/016967 | 0/022481 | **1436** | 0/002632 | 0/016348 | 0/021904 |
| 437 | 0/00317 | 0/016967 | 0/022481 | **1437** | 0/002632 | 0/016348 | 0/021904 |
| 438 | 0/00317 | 0/016967 | 0/022481 | **1438** | 0/002632 | 0/016348 | 0/021904 |
| 439 | 0/00317 | 0/016967 | 0/022481 | **1439** | 0/002632 | 0/016348 | 0/021904 |
| 440 | 0/00317 | 0/016967 | 0/022481 | **1440** | 0/002632 | 0/016348 | 0/021904 |
| 441 | 0/00317 | 0/016967 | 0/022481 | **1441** | 0/002632 | 0/016348 | 0/021904 |
| 442 | 0/00317 | 0/016967 | 0/022481 | **1442** | 0/002632 | 0/016348 | 0/021904 |
| 443 | 0/00317 | 0/016967 | 0/022481 | **1443** | 0/002632 | 0/016348 | 0/021904 |
| 444 | 0/00317 | 0/016967 | 0/022481 | **1444** | 0/002632 | 0/016348 | 0/021904 |
| 445 | 0/00317 | 0/016967 | 0/022481 | **1445** | 0/002632 | 0/016348 | 0/021904 |
| 446 | 0/00317 | 0/016967 | 0/022481 | **1446** | 0/002632 | 0/016348 | 0/021904 |
| 447 | 0/00317 | 0/016967 | 0/022481 | **1447** | 0/002632 | 0/016348 | 0/021904 |
| 448 | 0/00317 | 0/016967 | 0/022481 | **1448** | 0/002632 | 0/016348 | 0/021904 |
| 449 | 0/00317 | 0/016967 | 0/022481 | **1449** | 0/002632 | 0/016348 | 0/021904 |
| 450 | 0/00317 | 0/016967 | 0/022481 | **1450** | 0/002632 | 0/016348 | 0/021904 |
| 451 | 0/00317 | 0/016967 | 0/022481 | **1451** | 0/002632 | 0/016348 | 0/021904 |
| 452 | 0/00317 | 0/016967 | 0/022481 | **1452** | 0/002632 | 0/016348 | 0/021904 |
| 453 | 0/00317 | 0/016967 | 0/022481 | **1453** | 0/002632 | 0/016348 | 0/021904 |
| 454 | 0/00317 | 0/016967 | 0/022481 | **1454** | 0/002632 | 0/016348 | 0/021904 |
| 455 | 0/00317 | 0/016967 | 0/022481 | **1455** | 0/002632 | 0/016348 | 0/021904 |
| 456 | 0/003055 | 0/016967 | 0/022481 | **1456** | 0/002632 | 0/016348 | 0/021904 |
| 457 | 0/003055 | 0/016967 | 0/022481 | **1457** | 0/002632 | 0/016348 | 0/021904 |
| 458 | 0/003055 | 0/016967 | 0/022481 | **1458** | 0/002632 | 0/016348 | 0/021904 |
| 459 | 0/003055 | 0/016967 | 0/022481 | **1459** | 0/002632 | 0/016348 | 0/021904 |
| 460 | 0/003055 | 0/016967 | 0/022481 | **1460** | 0/002632 | 0/016348 | 0/021904 |
| 461 | 0/003055 | 0/016967 | 0/022481 | **1461** | 0/002632 | 0/016348 | 0/021904 |
| 462 | 0/003055 | 0/016967 | 0/022481 | **1462** | 0/002632 | 0/016348 | 0/021904 |
| 463 | 0/003055 | 0/016967 | 0/022481 | **1463** | 0/002632 | 0/016348 | 0/021904 |
| 464 | 0/003055 | 0/016967 | 0/022481 | **1464** | 0/002632 | 0/016348 | 0/021904 |
| 465 | 0/003055 | 0/016967 | 0/022481 | **1465** | 0/002632 | 0/016348 | 0/021904 |
| 466 | 0/003055 | 0/016967 | 0/022481 | **1466** | 0/002632 | 0/016348 | 0/021904 |
| 467 | 0/003055 | 0/016967 | 0/022481 | **1467** | 0/002632 | 0/016348 | 0/021904 |
| 468 | 0/003055 | 0/016967 | 0/022481 | **1468** | 0/002632 | 0/016348 | 0/021904 |
| 469 | 0/003055 | 0/016967 | 0/022481 | **1469** | 0/002632 | 0/016348 | 0/021904 |
| 470 | 0/003055 | 0/016967 | 0/022481 | **1470** | 0/002632 | 0/016348 | 0/021904 |
| 471 | 0/003055 | 0/016967 | 0/022481 | **1471** | 0/002632 | 0/016348 | 0/021904 |
| 472 | 0/003055 | 0/016967 | 0/022481 | **1472** | 0/002632 | 0/016348 | 0/021904 |
| 473 | 0/003055 | 0/016967 | 0/022481 | **1473** | 0/002632 | 0/016348 | 0/021904 |
| 474 | 0/003055 | 0/016967 | 0/022481 | **1474** | 0/002632 | 0/016348 | 0/021904 |
| 475 | 0/003055 | 0/016967 | 0/022481 | **1475** | 0/002632 | 0/016348 | 0/021904 |
| 476 | 0/003055 | 0/016967 | 0/022481 | **1476** | 0/002632 | 0/016348 | 0/021904 |
| 477 | 0/003055 | 0/016967 | 0/022481 | **1477** | 0/002632 | 0/016348 | 0/021904 |
| 478 | 0/003055 | 0/016967 | 0/022481 | **1478** | 0/002632 | 0/016348 | 0/021904 |
| 479 | 0/003055 | 0/016967 | 0/022481 | **1479** | 0/002632 | 0/016348 | 0/021904 |
| 480 | 0/003055 | 0/016967 | 0/022481 | **1480** | 0/002632 | 0/016348 | 0/021904 |
| 481 | 0/003055 | 0/016967 | 0/022481 | **1481** | 0/002632 | 0/016348 | 0/021904 |
| 482 | 0/003055 | 0/016967 | 0/022481 | **1482** | 0/002632 | 0/016348 | 0/021904 |
| 483 | 0/003055 | 0/016967 | 0/022481 | **1483** | 0/002632 | 0/016348 | 0/021904 |
| 484 | 0/003055 | 0/016967 | 0/022481 | **1484** | 0/002632 | 0/016348 | 0/021904 |
| 485 | 0/003055 | 0/016967 | 0/022481 | **1485** | 0/002632 | 0/016348 | 0/021904 |
| 486 | 0/003055 | 0/016967 | 0/022481 | **1486** | 0/002632 | 0/016348 | 0/021904 |
| 487 | 0/003055 | 0/016967 | 0/022481 | **1487** | 0/002632 | 0/016348 | 0/021904 |
| 488 | 0/003055 | 0/016967 | 0/022481 | **1488** | 0/002632 | 0/016348 | 0/021904 |
| 489 | 0/003055 | 0/016967 | 0/022481 | **1489** | 0/002632 | 0/016348 | 0/021904 |
| 490 | 0/003055 | 0/016967 | 0/022481 | **1490** | 0/002632 | 0/016348 | 0/021904 |
| 491 | 0/003055 | 0/016967 | 0/022481 | **1491** | 0/002632 | 0/016348 | 0/021904 |
| 492 | 0/003055 | 0/016967 | 0/022481 | **1492** | 0/002632 | 0/016348 | 0/021904 |
| 493 | 0/003055 | 0/016967 | 0/022481 | **1493** | 0/002632 | 0/016348 | 0/021904 |
| 494 | 0/003055 | 0/016967 | 0/022481 | **1494** | 0/002632 | 0/016348 | 0/021904 |
| 495 | 0/003055 | 0/016967 | 0/022481 | **1495** | 0/002632 | 0/016348 | 0/021904 |
| 496 | 0/003055 | 0/016967 | 0/022481 | **1496** | 0/002632 | 0/016348 | 0/021904 |
| 497 | 0/003055 | 0/016967 | 0/022481 | **1497** | 0/002632 | 0/016348 | 0/021904 |
| 498 | 0/003055 | 0/016967 | 0/022481 | **1498** | 0/002632 | 0/016348 | 0/021904 |
| 499 | 0/003055 | 0/016967 | 0/022481 | **1499** | 0/002632 | 0/016348 | 0/021904 |
| 500 | 0/003055 | 0/016967 | 0/022481 | **1500** | 0/002632 | 0/016348 | 0/021904 |
| 501 | 0/003055 | 0/016967 | 0/022481 | **1501** | 0/002632 | 0/016348 | 0/021904 |
| 502 | 0/003055 | 0/016967 | 0/022481 | **1502** | 0/002632 | 0/016348 | 0/021904 |
| 503 | 0/003055 | 0/016967 | 0/022481 | **1503** | 0/002632 | 0/016348 | 0/021904 |
| 504 | 0/003055 | 0/016967 | 0/022481 | **1504** | 0/002632 | 0/016348 | 0/021904 |
| 505 | 0/003055 | 0/016967 | 0/022481 | **1505** | 0/002632 | 0/016348 | 0/021904 |
| 506 | 0/003055 | 0/016967 | 0/022481 | **1506** | 0/002632 | 0/016348 | 0/021904 |
| 507 | 0/003055 | 0/016967 | 0/022481 | **1507** | 0/002632 | 0/016348 | 0/021904 |
| 508 | 0/003055 | 0/016967 | 0/022481 | **1508** | 0/002632 | 0/016348 | 0/021904 |
| 509 | 0/003055 | 0/016967 | 0/022481 | **1509** | 0/002632 | 0/016348 | 0/021904 |
| 510 | 0/003055 | 0/016967 | 0/022481 | **1510** | 0/002632 | 0/016348 | 0/021904 |
| 511 | 0/003055 | 0/016967 | 0/022481 | **1511** | 0/002632 | 0/016348 | 0/021904 |
| 512 | 0/003055 | 0/016967 | 0/022481 | **1512** | 0/002632 | 0/016348 | 0/021904 |
| 513 | 0/003055 | 0/016967 | 0/022481 | **1513** | 0/002632 | 0/016348 | 0/021904 |
| 514 | 0/003055 | 0/016967 | 0/022481 | **1514** | 0/002632 | 0/016348 | 0/021904 |
| 515 | 0/003055 | 0/016967 | 0/022481 | **1515** | 0/002632 | 0/016348 | 0/021904 |
| 516 | 0/003055 | 0/016967 | 0/022481 | **1516** | 0/002632 | 0/016348 | 0/021904 |
| 517 | 0/003055 | 0/016967 | 0/022481 | **1517** | 0/002632 | 0/016348 | 0/021904 |
| 518 | 0/003055 | 0/016967 | 0/022481 | **1518** | 0/002629 | 0/016348 | 0/021904 |
| 519 | 0/003055 | 0/016967 | 0/022481 | **1519** | 0/002629 | 0/016348 | 0/021904 |
| 520 | 0/003055 | 0/016967 | 0/022481 | **1520** | 0/002629 | 0/016348 | 0/021904 |
| 521 | 0/003055 | 0/016967 | 0/022481 | **1521** | 0/002629 | 0/016348 | 0/021904 |
| 522 | 0/003055 | 0/016967 | 0/022481 | **1522** | 0/002629 | 0/016348 | 0/021904 |
| 523 | 0/003055 | 0/016967 | 0/022481 | **1523** | 0/002629 | 0/016348 | 0/021904 |
| 524 | 0/003055 | 0/016967 | 0/022481 | **1524** | 0/002629 | 0/016348 | 0/021904 |
| 525 | 0/003055 | 0/016967 | 0/022481 | **1525** | 0/002629 | 0/016348 | 0/021904 |
| 526 | 0/003055 | 0/016967 | 0/022481 | **1526** | 0/002629 | 0/016348 | 0/021904 |
| 527 | 0/003055 | 0/016967 | 0/022481 | **1527** | 0/002629 | 0/016348 | 0/021904 |
| 528 | 0/003055 | 0/016967 | 0/022481 | **1528** | 0/002604 | 0/016348 | 0/021904 |
| 529 | 0/003055 | 0/016967 | 0/022481 | **1529** | 0/002604 | 0/016348 | 0/021904 |
| 530 | 0/003055 | 0/016967 | 0/022481 | **1530** | 0/002604 | 0/016348 | 0/021904 |
| 531 | 0/003055 | 0/016967 | 0/022481 | **1531** | 0/002604 | 0/016348 | 0/021904 |
| 532 | 0/0029 | 0/016967 | 0/022481 | **1532** | 0/002604 | 0/016348 | 0/021904 |
| 533 | 0/0029 | 0/016967 | 0/022481 | **1533** | 0/002604 | 0/016348 | 0/021904 |
| 534 | 0/0029 | 0/016967 | 0/022481 | **1534** | 0/002604 | 0/016348 | 0/021904 |
| 535 | 0/0029 | 0/016967 | 0/022481 | **1535** | 0/002604 | 0/016348 | 0/021904 |
| 536 | 0/0029 | 0/016967 | 0/022481 | **1536** | 0/002604 | 0/016348 | 0/021904 |
| 537 | 0/0029 | 0/016967 | 0/022481 | **1537** | 0/002604 | 0/016348 | 0/021904 |
| 538 | 0/0029 | 0/016967 | 0/022481 | **1538** | 0/002604 | 0/016348 | 0/021904 |
| 539 | 0/0029 | 0/016967 | 0/022481 | **1539** | 0/002604 | 0/016348 | 0/021904 |
| 540 | 0/0029 | 0/016967 | 0/022481 | **1540** | 0/002604 | 0/016348 | 0/021904 |
| 541 | 0/0029 | 0/016967 | 0/022481 | **1541** | 0/002604 | 0/016348 | 0/021904 |
| 542 | 0/0029 | 0/016967 | 0/022481 | **1542** | 0/002604 | 0/016348 | 0/021904 |
| 543 | 0/0029 | 0/016967 | 0/022481 | **1543** | 0/002604 | 0/016348 | 0/021904 |
| 544 | 0/0029 | 0/016967 | 0/022481 | **1544** | 0/002604 | 0/016348 | 0/021904 |
| 545 | 0/0029 | 0/016967 | 0/022481 | **1545** | 0/002604 | 0/016348 | 0/021904 |
| 546 | 0/0029 | 0/016967 | 0/02209 | **1546** | 0/002604 | 0/016348 | 0/021904 |
| 547 | 0/0029 | 0/016967 | 0/02209 | **1547** | 0/002604 | 0/016348 | 0/021904 |
| 548 | 0/0029 | 0/016967 | 0/02209 | **1548** | 0/002604 | 0/016348 | 0/021904 |
| 549 | 0/0029 | 0/016967 | 0/02209 | **1549** | 0/002604 | 0/016348 | 0/021904 |
| 550 | 0/0029 | 0/016967 | 0/02209 | **1550** | 0/002604 | 0/016348 | 0/021904 |
| 551 | 0/0029 | 0/016967 | 0/02209 | **1551** | 0/002604 | 0/016348 | 0/021904 |
| 552 | 0/0029 | 0/016967 | 0/02209 | **1552** | 0/002604 | 0/016348 | 0/021904 |
| 553 | 0/0029 | 0/016967 | 0/02209 | **1553** | 0/002604 | 0/016348 | 0/021904 |
| 554 | 0/0029 | 0/016967 | 0/02209 | **1554** | 0/002604 | 0/016348 | 0/021904 |
| 555 | 0/0029 | 0/016967 | 0/02209 | **1555** | 0/002604 | 0/016348 | 0/021904 |
| 556 | 0/0029 | 0/016967 | 0/02209 | **1556** | 0/002604 | 0/016348 | 0/021904 |
| 557 | 0/0029 | 0/016967 | 0/02209 | **1557** | 0/002604 | 0/016348 | 0/021904 |
| 558 | 0/0029 | 0/016967 | 0/02209 | **1558** | 0/002604 | 0/016348 | 0/021904 |
| 559 | 0/0029 | 0/016967 | 0/02209 | **1559** | 0/002604 | 0/016348 | 0/021904 |
| 560 | 0/0029 | 0/016967 | 0/02209 | **1560** | 0/002604 | 0/016348 | 0/021904 |
| 561 | 0/0029 | 0/016967 | 0/02209 | **1561** | 0/002604 | 0/016348 | 0/021904 |
| 562 | 0/0029 | 0/016967 | 0/02209 | **1562** | 0/002604 | 0/016348 | 0/021904 |
| 563 | 0/0029 | 0/016967 | 0/02209 | **1563** | 0/002604 | 0/016348 | 0/021904 |
| 564 | 0/0029 | 0/016967 | 0/02209 | **1564** | 0/002604 | 0/016348 | 0/021904 |
| 565 | 0/0029 | 0/016967 | 0/02209 | **1565** | 0/002604 | 0/016348 | 0/021904 |
| 566 | 0/0029 | 0/016967 | 0/02209 | **1566** | 0/002604 | 0/016348 | 0/021904 |
| 567 | 0/0029 | 0/016967 | 0/02209 | **1567** | 0/002604 | 0/016348 | 0/021904 |
| 568 | 0/0029 | 0/016967 | 0/02209 | **1568** | 0/002604 | 0/016348 | 0/021904 |
| 569 | 0/0029 | 0/016967 | 0/02209 | **1569** | 0/002604 | 0/016348 | 0/021904 |
| 570 | 0/0029 | 0/016967 | 0/02209 | **1570** | 0/002604 | 0/016348 | 0/021904 |
| 571 | 0/0029 | 0/016967 | 0/02209 | **1571** | 0/002604 | 0/016348 | 0/021904 |
| 572 | 0/0029 | 0/016967 | 0/02209 | **1572** | 0/002604 | 0/016348 | 0/021904 |
| 573 | 0/0029 | 0/016967 | 0/02209 | **1573** | 0/002604 | 0/016348 | 0/021904 |
| 574 | 0/0029 | 0/016967 | 0/02209 | **1574** | 0/002604 | 0/016348 | 0/021904 |
| 575 | 0/0029 | 0/016967 | 0/02209 | **1575** | 0/002604 | 0/016348 | 0/021904 |
| 576 | 0/0029 | 0/016967 | 0/02209 | **1576** | 0/002604 | 0/016348 | 0/021904 |
| 577 | 0/0029 | 0/016967 | 0/02209 | **1577** | 0/002604 | 0/016348 | 0/021904 |
| 578 | 0/0029 | 0/016967 | 0/02209 | **1578** | 0/002604 | 0/016348 | 0/021904 |
| 579 | 0/0029 | 0/016967 | 0/02209 | **1579** | 0/002604 | 0/016348 | 0/021904 |
| 580 | 0/0029 | 0/016967 | 0/02209 | **1580** | 0/002604 | 0/016348 | 0/021904 |
| 581 | 0/0029 | 0/016967 | 0/02209 | **1581** | 0/002604 | 0/016348 | 0/021904 |
| 582 | 0/0029 | 0/016967 | 0/02209 | **1582** | 0/002604 | 0/016348 | 0/021904 |
| 583 | 0/0029 | 0/016967 | 0/02209 | **1583** | 0/002604 | 0/016348 | 0/021904 |
| 584 | 0/0029 | 0/016967 | 0/02209 | **1584** | 0/002604 | 0/016348 | 0/021904 |
| 585 | 0/0029 | 0/016967 | 0/02209 | **1585** | 0/002604 | 0/016348 | 0/021904 |
| 586 | 0/0029 | 0/016967 | 0/02209 | **1586** | 0/002604 | 0/016348 | 0/021904 |
| 587 | 0/0029 | 0/016967 | 0/02209 | **1587** | 0/002604 | 0/016348 | 0/021904 |
| 588 | 0/0029 | 0/016967 | 0/02209 | **1588** | 0/002604 | 0/016348 | 0/021904 |
| 589 | 0/0029 | 0/016967 | 0/02209 | **1589** | 0/002604 | 0/016348 | 0/021904 |
| 590 | 0/0029 | 0/016967 | 0/02209 | **1590** | 0/002604 | 0/016348 | 0/021904 |
| 591 | 0/0029 | 0/016967 | 0/02209 | **1591** | 0/002604 | 0/016348 | 0/021904 |
| 592 | 0/0029 | 0/016967 | 0/02209 | **1592** | 0/002604 | 0/016348 | 0/021904 |
| 593 | 0/0029 | 0/016967 | 0/02209 | **1593** | 0/002604 | 0/016348 | 0/021904 |
| 594 | 0/0029 | 0/016967 | 0/02209 | **1594** | 0/002604 | 0/016348 | 0/021904 |
| 595 | 0/0029 | 0/016967 | 0/02209 | **1595** | 0/002604 | 0/016348 | 0/021904 |
| 596 | 0/0029 | 0/016967 | 0/02209 | **1596** | 0/002604 | 0/016348 | 0/021904 |
| 597 | 0/0029 | 0/016967 | 0/02209 | **1597** | 0/002604 | 0/016348 | 0/021904 |
| 598 | 0/0029 | 0/016967 | 0/02209 | **1598** | 0/002604 | 0/016348 | 0/021904 |
| 599 | 0/0029 | 0/016967 | 0/02209 | **1599** | 0/002604 | 0/016348 | 0/021904 |
| 600 | 0/0029 | 0/016967 | 0/02209 | **1600** | 0/002604 | 0/016348 | 0/021904 |
| 601 | 0/0029 | 0/016967 | 0/02209 | **1601** | 0/002604 | 0/016348 | 0/021904 |
| 602 | 0/0029 | 0/016967 | 0/02209 | **1602** | 0/002592 | 0/016348 | 0/021904 |
| 603 | 0/0029 | 0/016967 | 0/02209 | **1603** | 0/002592 | 0/016348 | 0/021904 |
| 604 | 0/0029 | 0/016967 | 0/02209 | **1604** | 0/002592 | 0/016348 | 0/021904 |
| 605 | 0/0029 | 0/016967 | 0/02209 | **1605** | 0/002592 | 0/016348 | 0/021904 |
| 606 | 0/0029 | 0/016967 | 0/02209 | **1606** | 0/002592 | 0/016348 | 0/021904 |
| 607 | 0/0029 | 0/016967 | 0/02209 | **1607** | 0/002592 | 0/016348 | 0/021904 |
| 608 | 0/0029 | 0/016967 | 0/02209 | **1608** | 0/002592 | 0/016348 | 0/021904 |
| 609 | 0/0029 | 0/016967 | 0/02209 | **1609** | 0/002592 | 0/016348 | 0/021904 |
| 610 | 0/0029 | 0/016967 | 0/02209 | **1610** | 0/002592 | 0/016348 | 0/021904 |
| 611 | 0/0029 | 0/016967 | 0/02209 | **1611** | 0/002592 | 0/016348 | 0/021904 |
| 612 | 0/0029 | 0/016967 | 0/02209 | **1612** | 0/002592 | 0/016348 | 0/021904 |
| 613 | 0/0029 | 0/016967 | 0/02209 | **1613** | 0/002592 | 0/016348 | 0/021904 |
| 614 | 0/0029 | 0/016967 | 0/02209 | **1614** | 0/002592 | 0/016348 | 0/021904 |
| 615 | 0/0029 | 0/016967 | 0/02209 | **1615** | 0/002592 | 0/016348 | 0/021904 |
| 616 | 0/0029 | 0/016967 | 0/02209 | **1616** | 0/002592 | 0/016348 | 0/021904 |
| 617 | 0/0029 | 0/016967 | 0/02209 | **1617** | 0/002592 | 0/016348 | 0/021904 |
| 618 | 0/0029 | 0/016967 | 0/02209 | **1618** | 0/002592 | 0/016348 | 0/021904 |
| 619 | 0/0029 | 0/016967 | 0/02209 | **1619** | 0/002592 | 0/016348 | 0/021904 |
| 620 | 0/0029 | 0/016967 | 0/02209 | **1620** | 0/002592 | 0/016348 | 0/021904 |
| 621 | 0/0029 | 0/016967 | 0/02209 | **1621** | 0/002592 | 0/016348 | 0/021904 |
| 622 | 0/002831 | 0/016967 | 0/02209 | **1622** | 0/002592 | 0/016348 | 0/021904 |
| 623 | 0/002831 | 0/016967 | 0/02209 | **1623** | 0/002592 | 0/016348 | 0/021904 |
| 624 | 0/002831 | 0/016967 | 0/02209 | **1624** | 0/002592 | 0/016348 | 0/021904 |
| 625 | 0/002831 | 0/016967 | 0/02209 | **1625** | 0/002592 | 0/016348 | 0/021904 |
| 626 | 0/002831 | 0/016967 | 0/02209 | **1626** | 0/002592 | 0/016348 | 0/021904 |
| 627 | 0/002831 | 0/016967 | 0/02209 | **1627** | 0/002592 | 0/016348 | 0/021904 |
| 628 | 0/002831 | 0/016967 | 0/02209 | **1628** | 0/002592 | 0/016348 | 0/021904 |
| 629 | 0/002831 | 0/016967 | 0/02209 | **1629** | 0/002592 | 0/016348 | 0/021904 |
| 630 | 0/002831 | 0/016967 | 0/02209 | **1630** | 0/002592 | 0/016348 | 0/021904 |
| 631 | 0/002831 | 0/016967 | 0/02209 | **1631** | 0/002592 | 0/016348 | 0/021904 |
| 632 | 0/002831 | 0/016967 | 0/02209 | **1632** | 0/002592 | 0/016348 | 0/021904 |
| 633 | 0/002831 | 0/016967 | 0/02209 | **1633** | 0/002592 | 0/016348 | 0/021904 |
| 634 | 0/002831 | 0/016967 | 0/02209 | **1634** | 0/002592 | 0/016348 | 0/021904 |
| 635 | 0/002831 | 0/016967 | 0/02209 | **1635** | 0/002592 | 0/016348 | 0/021904 |
| 636 | 0/002831 | 0/016967 | 0/02209 | **1636** | 0/002592 | 0/016348 | 0/021904 |
| 637 | 0/002831 | 0/016967 | 0/02209 | **1637** | 0/002592 | 0/016348 | 0/021904 |
| 638 | 0/002831 | 0/016967 | 0/02209 | **1638** | 0/002592 | 0/016348 | 0/021904 |
| 639 | 0/002831 | 0/016967 | 0/02209 | **1639** | 0/002592 | 0/016348 | 0/021904 |
| 640 | 0/002831 | 0/016967 | 0/02209 | **1640** | 0/002592 | 0/016348 | 0/021904 |
| 641 | 0/002831 | 0/016967 | 0/02209 | **1641** | 0/002592 | 0/016348 | 0/021904 |
| 642 | 0/002831 | 0/016967 | 0/02209 | **1642** | 0/002592 | 0/016348 | 0/021904 |
| 643 | 0/002831 | 0/016967 | 0/02209 | **1643** | 0/002592 | 0/016348 | 0/021904 |
| 644 | 0/002831 | 0/016967 | 0/02209 | **1644** | 0/002592 | 0/016348 | 0/021904 |
| 645 | 0/002831 | 0/016702 | 0/02209 | **1645** | 0/002592 | 0/016348 | 0/021904 |
| 646 | 0/002831 | 0/016702 | 0/02209 | **1646** | 0/002592 | 0/016348 | 0/021904 |
| 647 | 0/002831 | 0/016702 | 0/02209 | **1647** | 0/002592 | 0/016348 | 0/021904 |
| 648 | 0/002831 | 0/016702 | 0/02209 | **1648** | 0/002592 | 0/016348 | 0/021904 |
| 649 | 0/002831 | 0/016702 | 0/02209 | **1649** | 0/002592 | 0/016348 | 0/021904 |
| 650 | 0/002831 | 0/016702 | 0/02209 | **1650** | 0/002592 | 0/016348 | 0/021904 |
| 651 | 0/002831 | 0/016702 | 0/02209 | **1651** | 0/002592 | 0/016348 | 0/021904 |
| 652 | 0/002831 | 0/016702 | 0/02209 | **1652** | 0/002592 | 0/016348 | 0/021904 |
| 653 | 0/002831 | 0/016702 | 0/02209 | **1653** | 0/002592 | 0/016348 | 0/021904 |
| 654 | 0/002831 | 0/016702 | 0/02209 | **1654** | 0/002592 | 0/016348 | 0/021904 |
| 655 | 0/002831 | 0/016702 | 0/02209 | **1655** | 0/002592 | 0/016348 | 0/021904 |
| 656 | 0/002831 | 0/016702 | 0/02209 | **1656** | 0/002592 | 0/016348 | 0/021904 |
| 657 | 0/002831 | 0/016702 | 0/02209 | **1657** | 0/002592 | 0/016348 | 0/021904 |
| 658 | 0/002831 | 0/016702 | 0/02209 | **1658** | 0/002592 | 0/016348 | 0/021904 |
| 659 | 0/002831 | 0/016702 | 0/02209 | **1659** | 0/002592 | 0/016348 | 0/021904 |
| 660 | 0/002831 | 0/016702 | 0/02209 | **1660** | 0/002592 | 0/016348 | 0/021904 |
| 661 | 0/002831 | 0/016702 | 0/02209 | **1661** | 0/002592 | 0/016348 | 0/021904 |
| 662 | 0/002831 | 0/016702 | 0/02209 | **1662** | 0/002592 | 0/016348 | 0/021904 |
| 663 | 0/002831 | 0/016702 | 0/02209 | **1663** | 0/002592 | 0/016348 | 0/021904 |
| 664 | 0/002831 | 0/016702 | 0/02209 | **1664** | 0/002592 | 0/016348 | 0/021904 |
| 665 | 0/002831 | 0/016702 | 0/02209 | **1665** | 0/002592 | 0/016348 | 0/021904 |
| 666 | 0/002831 | 0/016702 | 0/02209 | **1666** | 0/002592 | 0/016348 | 0/021904 |
| 667 | 0/002831 | 0/016702 | 0/02209 | **1667** | 0/002592 | 0/016348 | 0/021904 |
| 668 | 0/002831 | 0/016702 | 0/02209 | **1668** | 0/002592 | 0/016348 | 0/021904 |
| 669 | 0/002831 | 0/016702 | 0/02209 | **1669** | 0/002592 | 0/016348 | 0/021904 |
| 670 | 0/002831 | 0/016702 | 0/02209 | **1670** | 0/002592 | 0/016348 | 0/021904 |
| 671 | 0/002831 | 0/016702 | 0/02209 | **1671** | 0/002592 | 0/016348 | 0/021904 |
| 672 | 0/002831 | 0/016702 | 0/02209 | **1672** | 0/002592 | 0/016348 | 0/021904 |
| 673 | 0/002831 | 0/016702 | 0/02209 | **1673** | 0/002592 | 0/016348 | 0/021904 |
| 674 | 0/002831 | 0/016702 | 0/02209 | **1674** | 0/002592 | 0/016348 | 0/021904 |
| 675 | 0/002831 | 0/016702 | 0/02209 | **1675** | 0/002592 | 0/016348 | 0/021904 |
| 676 | 0/002831 | 0/016702 | 0/02209 | **1676** | 0/002592 | 0/016348 | 0/021904 |
| 677 | 0/002831 | 0/016702 | 0/02209 | **1677** | 0/002592 | 0/016348 | 0/021904 |
| 678 | 0/002831 | 0/016702 | 0/02209 | **1678** | 0/002592 | 0/016348 | 0/021904 |
| 679 | 0/002831 | 0/016702 | 0/02209 | **1679** | 0/002592 | 0/016348 | 0/021904 |
| 680 | 0/002831 | 0/016702 | 0/02209 | **1680** | 0/002592 | 0/016348 | 0/021904 |
| 681 | 0/002831 | 0/016702 | 0/02209 | **1681** | 0/002592 | 0/016348 | 0/021904 |
| 682 | 0/002831 | 0/016702 | 0/02209 | **1682** | 0/002592 | 0/016348 | 0/021904 |
| 683 | 0/002831 | 0/016702 | 0/02209 | **1683** | 0/002592 | 0/016348 | 0/021904 |
| 684 | 0/002831 | 0/016702 | 0/02209 | **1684** | 0/002592 | 0/016348 | 0/021904 |
| 685 | 0/002831 | 0/016702 | 0/02209 | **1685** | 0/002592 | 0/016348 | 0/021904 |
| 686 | 0/002831 | 0/016702 | 0/02209 | **1686** | 0/002592 | 0/016348 | 0/021904 |
| 687 | 0/002831 | 0/016702 | 0/02209 | **1687** | 0/002592 | 0/016348 | 0/021904 |
| 688 | 0/002831 | 0/016702 | 0/02209 | **1688** | 0/002592 | 0/016348 | 0/021904 |
| 689 | 0/002831 | 0/016702 | 0/02209 | **1689** | 0/002592 | 0/016348 | 0/021904 |
| 690 | 0/002831 | 0/016702 | 0/02209 | **1690** | 0/002592 | 0/016348 | 0/021904 |
| 691 | 0/002831 | 0/016702 | 0/02209 | **1691** | 0/002592 | 0/016348 | 0/021812 |
| 692 | 0/002831 | 0/016702 | 0/02209 | **1692** | 0/002592 | 0/016348 | 0/021812 |
| 693 | 0/002831 | 0/016702 | 0/02209 | **1693** | 0/002592 | 0/016348 | 0/021812 |
| 694 | 0/002831 | 0/016702 | 0/02209 | **1694** | 0/002592 | 0/016348 | 0/021812 |
| 695 | 0/002831 | 0/016702 | 0/02209 | **1695** | 0/002592 | 0/016348 | 0/021812 |
| 696 | 0/002831 | 0/016702 | 0/02209 | **1696** | 0/002592 | 0/016348 | 0/021812 |
| 697 | 0/002831 | 0/016702 | 0/02209 | **1697** | 0/002592 | 0/016348 | 0/021812 |
| 698 | 0/002831 | 0/016702 | 0/02209 | **1698** | 0/002592 | 0/016348 | 0/021812 |
| 699 | 0/002831 | 0/016702 | 0/02209 | **1699** | 0/002592 | 0/016348 | 0/021812 |
| 700 | 0/002831 | 0/016702 | 0/02209 | **1700** | 0/002592 | 0/016348 | 0/021812 |
| 701 | 0/002831 | 0/016702 | 0/02209 | **1701** | 0/002592 | 0/016348 | 0/021812 |
| 702 | 0/002831 | 0/016702 | 0/02209 | **1702** | 0/002592 | 0/016348 | 0/021812 |
| 703 | 0/002831 | 0/016702 | 0/02209 | **1703** | 0/002592 | 0/016348 | 0/021812 |
| 704 | 0/002831 | 0/016702 | 0/02209 | **1704** | 0/002592 | 0/016348 | 0/021812 |
| 705 | 0/002831 | 0/016702 | 0/02209 | **1705** | 0/002592 | 0/016348 | 0/021812 |
| 706 | 0/002831 | 0/016702 | 0/02209 | **1706** | 0/002592 | 0/016348 | 0/021812 |
| 707 | 0/002831 | 0/016702 | 0/02209 | **1707** | 0/002592 | 0/016348 | 0/021812 |
| 708 | 0/002831 | 0/016702 | 0/02209 | **1708** | 0/002592 | 0/016348 | 0/021812 |
| 709 | 0/002831 | 0/016702 | 0/02209 | **1709** | 0/002592 | 0/016348 | 0/021812 |
| 710 | 0/002831 | 0/016702 | 0/02209 | **1710** | 0/002592 | 0/016348 | 0/021812 |
| 711 | 0/002831 | 0/016702 | 0/02209 | **1711** | 0/002592 | 0/016348 | 0/021812 |
| 712 | 0/002831 | 0/016702 | 0/02209 | **1712** | 0/002592 | 0/016348 | 0/021812 |
| 713 | 0/002831 | 0/016702 | 0/02209 | **1713** | 0/002592 | 0/016348 | 0/021812 |
| 714 | 0/002831 | 0/016702 | 0/02209 | **1714** | 0/002592 | 0/016348 | 0/021812 |
| 715 | 0/002831 | 0/016702 | 0/02209 | **1715** | 0/002592 | 0/016348 | 0/021812 |
| 716 | 0/002831 | 0/016702 | 0/02209 | **1716** | 0/002592 | 0/016348 | 0/021812 |
| 717 | 0/002831 | 0/016702 | 0/02209 | **1717** | 0/002592 | 0/016348 | 0/021812 |
| 718 | 0/002831 | 0/016702 | 0/02209 | **1718** | 0/002592 | 0/016348 | 0/021812 |
| 719 | 0/002831 | 0/016702 | 0/02209 | **1719** | 0/002592 | 0/016348 | 0/021812 |
| 720 | 0/002831 | 0/016702 | 0/02209 | **1720** | 0/002592 | 0/016348 | 0/021812 |
| 721 | 0/00278 | 0/016702 | 0/02209 | **1721** | 0/002592 | 0/016348 | 0/021812 |
| 722 | 0/00278 | 0/016702 | 0/02209 | **1722** | 0/002592 | 0/016348 | 0/021812 |
| 723 | 0/00278 | 0/016702 | 0/02209 | **1723** | 0/002592 | 0/016348 | 0/021812 |
| 724 | 0/00278 | 0/016702 | 0/02209 | **1724** | 0/002592 | 0/016348 | 0/021812 |
| 725 | 0/00278 | 0/016702 | 0/02209 | **1725** | 0/002592 | 0/016348 | 0/021812 |
| 726 | 0/00278 | 0/016702 | 0/02209 | **1726** | 0/002592 | 0/016348 | 0/021812 |
| 727 | 0/00278 | 0/016702 | 0/02209 | **1727** | 0/002592 | 0/016348 | 0/021812 |
| 728 | 0/00278 | 0/016702 | 0/02209 | **1728** | 0/002592 | 0/016348 | 0/021812 |
| 729 | 0/00278 | 0/016702 | 0/02209 | **1729** | 0/002592 | 0/016348 | 0/021812 |
| 730 | 0/00278 | 0/016702 | 0/02209 | **1730** | 0/002592 | 0/016348 | 0/021812 |
| 731 | 0/00278 | 0/016702 | 0/02209 | **1731** | 0/002592 | 0/016348 | 0/021812 |
| 732 | 0/00278 | 0/016702 | 0/02209 | **1732** | 0/002592 | 0/016348 | 0/021812 |
| 733 | 0/00278 | 0/016702 | 0/02209 | **1733** | 0/002592 | 0/016348 | 0/021812 |
| 734 | 0/00278 | 0/016702 | 0/02209 | **1734** | 0/002592 | 0/016348 | 0/021812 |
| 735 | 0/00278 | 0/016702 | 0/02209 | **1735** | 0/002592 | 0/016348 | 0/021812 |
| 736 | 0/00278 | 0/016702 | 0/02209 | **1736** | 0/002592 | 0/016348 | 0/021812 |
| 737 | 0/00278 | 0/016702 | 0/02209 | **1737** | 0/002592 | 0/016348 | 0/021812 |
| 738 | 0/00278 | 0/016702 | 0/02209 | **1738** | 0/002592 | 0/016348 | 0/021812 |
| 739 | 0/00278 | 0/016702 | 0/02209 | **1739** | 0/002592 | 0/016348 | 0/021812 |
| 740 | 0/00278 | 0/016702 | 0/02209 | **1740** | 0/002592 | 0/016348 | 0/021812 |
| 741 | 0/00278 | 0/016702 | 0/02209 | **1741** | 0/002592 | 0/016348 | 0/021812 |
| 742 | 0/00278 | 0/016702 | 0/02209 | **1742** | 0/002592 | 0/016348 | 0/021812 |
| 743 | 0/00278 | 0/016702 | 0/02209 | **1743** | 0/002592 | 0/016348 | 0/021812 |
| 744 | 0/00278 | 0/016702 | 0/02209 | **1744** | 0/002592 | 0/016348 | 0/021812 |
| 745 | 0/00278 | 0/016702 | 0/02209 | **1745** | 0/002592 | 0/016348 | 0/021812 |
| 746 | 0/00278 | 0/016702 | 0/02209 | **1746** | 0/002592 | 0/016348 | 0/021812 |
| 747 | 0/00278 | 0/016702 | 0/02209 | **1747** | 0/002592 | 0/016348 | 0/021812 |
| 748 | 0/00278 | 0/016702 | 0/02209 | **1748** | 0/002592 | 0/016348 | 0/021812 |
| 749 | 0/00278 | 0/016702 | 0/02209 | **1749** | 0/002592 | 0/016348 | 0/021812 |
| 750 | 0/00278 | 0/016702 | 0/02209 | **1750** | 0/002592 | 0/016348 | 0/021812 |
| 751 | 0/00278 | 0/016702 | 0/02209 | **1751** | 0/002592 | 0/016348 | 0/021812 |
| 752 | 0/00278 | 0/016702 | 0/02209 | **1752** | 0/002592 | 0/016348 | 0/021812 |
| 753 | 0/00278 | 0/016702 | 0/02209 | **1753** | 0/002592 | 0/016348 | 0/021812 |
| 754 | 0/00278 | 0/016702 | 0/02209 | **1754** | 0/002592 | 0/016348 | 0/021812 |
| 755 | 0/00278 | 0/016702 | 0/02209 | **1755** | 0/002592 | 0/016348 | 0/021812 |
| 756 | 0/00278 | 0/016702 | 0/02209 | **1756** | 0/002592 | 0/016348 | 0/021812 |
| 757 | 0/00278 | 0/016702 | 0/02209 | **1757** | 0/002592 | 0/016348 | 0/021812 |
| 758 | 0/00278 | 0/016702 | 0/02209 | **1758** | 0/002592 | 0/016348 | 0/021812 |
| 759 | 0/00278 | 0/016702 | 0/02209 | **1759** | 0/002592 | 0/016348 | 0/021812 |
| 760 | 0/00278 | 0/016702 | 0/02209 | **1760** | 0/002592 | 0/016348 | 0/021812 |
| 761 | 0/00278 | 0/016702 | 0/02209 | **1761** | 0/002592 | 0/016348 | 0/021812 |
| 762 | 0/00278 | 0/016702 | 0/02209 | **1762** | 0/002592 | 0/016348 | 0/021812 |
| 763 | 0/00278 | 0/016702 | 0/02209 | **1763** | 0/002592 | 0/016348 | 0/021812 |
| 764 | 0/00278 | 0/016702 | 0/02209 | **1764** | 0/002592 | 0/016348 | 0/021812 |
| 765 | 0/00278 | 0/016702 | 0/02209 | **1765** | 0/002592 | 0/016348 | 0/021812 |
| 766 | 0/00278 | 0/016702 | 0/02209 | **1766** | 0/002592 | 0/016348 | 0/021812 |
| 767 | 0/00278 | 0/016702 | 0/02209 | **1767** | 0/002592 | 0/016348 | 0/021812 |
| 768 | 0/00278 | 0/016702 | 0/02209 | **1768** | 0/002592 | 0/016348 | 0/021812 |
| 769 | 0/00278 | 0/016702 | 0/02209 | **1769** | 0/002592 | 0/016348 | 0/021812 |
| 770 | 0/00278 | 0/016702 | 0/02209 | **1770** | 0/002592 | 0/016348 | 0/021812 |
| 771 | 0/00278 | 0/016702 | 0/02209 | **1771** | 0/002592 | 0/016348 | 0/021812 |
| 772 | 0/00278 | 0/016702 | 0/02209 | **1772** | 0/002592 | 0/016348 | 0/021812 |
| 773 | 0/00278 | 0/016702 | 0/02209 | **1773** | 0/002592 | 0/016348 | 0/021812 |
| 774 | 0/00278 | 0/016702 | 0/02209 | **1774** | 0/002592 | 0/016348 | 0/021812 |
| 775 | 0/00278 | 0/016702 | 0/02209 | **1775** | 0/002592 | 0/016348 | 0/021812 |
| 776 | 0/00278 | 0/016702 | 0/02209 | **1776** | 0/002592 | 0/016348 | 0/021812 |
| 777 | 0/00278 | 0/016702 | 0/02209 | **1777** | 0/002592 | 0/016348 | 0/021812 |
| 778 | 0/00278 | 0/016702 | 0/02209 | **1778** | 0/002592 | 0/016348 | 0/021812 |
| 779 | 0/00278 | 0/016702 | 0/02209 | **1779** | 0/002592 | 0/016348 | 0/021812 |
| 780 | 0/00278 | 0/016702 | 0/02209 | **1780** | 0/002592 | 0/016348 | 0/021812 |
| 781 | 0/00278 | 0/016702 | 0/02209 | **1781** | 0/002592 | 0/016348 | 0/021812 |
| 782 | 0/00278 | 0/016702 | 0/02209 | **1782** | 0/002592 | 0/016348 | 0/021812 |
| 783 | 0/00278 | 0/016702 | 0/02209 | **1783** | 0/002592 | 0/016348 | 0/021812 |
| 784 | 0/00278 | 0/016702 | 0/02209 | **1784** | 0/002592 | 0/016348 | 0/021812 |
| 785 | 0/00278 | 0/016702 | 0/02209 | **1785** | 0/002592 | 0/016348 | 0/021812 |
| 786 | 0/00278 | 0/016702 | 0/02209 | **1786** | 0/002592 | 0/016348 | 0/021812 |
| 787 | 0/00278 | 0/016702 | 0/02209 | **1787** | 0/002592 | 0/016348 | 0/021812 |
| 788 | 0/00278 | 0/016702 | 0/02209 | **1788** | 0/002592 | 0/016348 | 0/021812 |
| 789 | 0/00278 | 0/016702 | 0/02209 | **1789** | 0/002592 | 0/016348 | 0/021812 |
| 790 | 0/00278 | 0/016702 | 0/02209 | **1790** | 0/002592 | 0/016348 | 0/021812 |
| 791 | 0/00278 | 0/016702 | 0/02209 | **1791** | 0/002592 | 0/016348 | 0/021812 |
| 792 | 0/00278 | 0/016702 | 0/02209 | **1792** | 0/002592 | 0/016348 | 0/021812 |
| 793 | 0/00278 | 0/016702 | 0/02209 | **1793** | 0/002592 | 0/016348 | 0/021812 |
| 794 | 0/00278 | 0/016702 | 0/02209 | **1794** | 0/002592 | 0/016348 | 0/021812 |
| 795 | 0/00278 | 0/016702 | 0/02209 | **1795** | 0/002592 | 0/016348 | 0/021812 |
| 796 | 0/00278 | 0/016702 | 0/02209 | **1796** | 0/002592 | 0/016348 | 0/021812 |
| 797 | 0/00278 | 0/016702 | 0/02209 | **1797** | 0/002592 | 0/016348 | 0/021812 |
| 798 | 0/00278 | 0/016702 | 0/02209 | **1798** | 0/002592 | 0/016348 | 0/021812 |
| 799 | 0/00278 | 0/016702 | 0/02209 | **1799** | 0/002592 | 0/016348 | 0/021812 |
| 800 | 0/00278 | 0/016702 | 0/02209 | **1800** | 0/002592 | 0/016348 | 0/021812 |
| 801 | 0/00278 | 0/016702 | 0/02209 | **1801** | 0/002592 | 0/016348 | 0/021812 |
| 802 | 0/00278 | 0/016702 | 0/02209 | **1802** | 0/002592 | 0/016348 | 0/021812 |
| 803 | 0/00278 | 0/016702 | 0/02209 | **1803** | 0/002592 | 0/016348 | 0/021812 |
| 804 | 0/00278 | 0/016702 | 0/02209 | **1804** | 0/002592 | 0/016348 | 0/021812 |
| 805 | 0/00278 | 0/016702 | 0/02209 | **1805** | 0/002592 | 0/016348 | 0/021812 |
| 806 | 0/00278 | 0/016702 | 0/02209 | **1806** | 0/002592 | 0/016348 | 0/021812 |
| 807 | 0/00278 | 0/016702 | 0/02209 | **1807** | 0/002592 | 0/016348 | 0/021812 |
| 808 | 0/00278 | 0/016702 | 0/02209 | **1808** | 0/002592 | 0/016348 | 0/021812 |
| 809 | 0/00278 | 0/016702 | 0/02209 | **1809** | 0/002592 | 0/016348 | 0/021812 |
| 810 | 0/00278 | 0/016702 | 0/02209 | **1810** | 0/002592 | 0/016348 | 0/021812 |
| 811 | 0/00278 | 0/016702 | 0/02209 | **1811** | 0/002592 | 0/016348 | 0/021812 |
| 812 | 0/00278 | 0/016702 | 0/02209 | **1812** | 0/002592 | 0/016348 | 0/021812 |
| 813 | 0/00278 | 0/016702 | 0/02209 | **1813** | 0/002592 | 0/016348 | 0/021812 |
| 814 | 0/00278 | 0/016702 | 0/02209 | **1814** | 0/002592 | 0/016348 | 0/021812 |
| 815 | 0/00278 | 0/016702 | 0/02209 | **1815** | 0/002592 | 0/016348 | 0/021812 |
| 816 | 0/00278 | 0/016702 | 0/02209 | **1816** | 0/002592 | 0/016348 | 0/021812 |
| 817 | 0/00278 | 0/016702 | 0/02209 | **1817** | 0/002592 | 0/016348 | 0/021812 |
| 818 | 0/00278 | 0/016702 | 0/02209 | **1818** | 0/002592 | 0/016348 | 0/021812 |
| 819 | 0/00278 | 0/016702 | 0/02209 | **1819** | 0/002592 | 0/016348 | 0/021812 |
| 820 | 0/00278 | 0/016702 | 0/02209 | **1820** | 0/002592 | 0/016348 | 0/021812 |
| 821 | 0/00278 | 0/016702 | 0/02209 | **1821** | 0/002592 | 0/016348 | 0/021812 |
| 822 | 0/00278 | 0/016702 | 0/02209 | **1822** | 0/002592 | 0/016348 | 0/021812 |
| 823 | 0/00278 | 0/016702 | 0/02209 | **1823** | 0/002592 | 0/016348 | 0/021812 |
| 824 | 0/00278 | 0/016702 | 0/02209 | **1824** | 0/002592 | 0/016348 | 0/021812 |
| 825 | 0/00278 | 0/016702 | 0/02209 | **1825** | 0/002592 | 0/016348 | 0/021812 |
| 826 | 0/00278 | 0/016702 | 0/02209 | **1826** | 0/002592 | 0/016348 | 0/021812 |
| 827 | 0/00278 | 0/016702 | 0/02209 | **1827** | 0/002592 | 0/016348 | 0/021812 |
| 828 | 0/00278 | 0/016702 | 0/02209 | **1828** | 0/002592 | 0/016348 | 0/021812 |
| 829 | 0/00278 | 0/016702 | 0/02209 | **1829** | 0/002592 | 0/016348 | 0/021812 |
| 830 | 0/00278 | 0/016702 | 0/02209 | **1830** | 0/002592 | 0/016348 | 0/021812 |
| 831 | 0/00278 | 0/016702 | 0/02209 | **1831** | 0/002592 | 0/016348 | 0/021812 |
| 832 | 0/00278 | 0/016702 | 0/02209 | **1832** | 0/002592 | 0/016348 | 0/021812 |
| 833 | 0/00278 | 0/016702 | 0/02209 | **1833** | 0/002592 | 0/016348 | 0/021812 |
| 834 | 0/00278 | 0/016702 | 0/02209 | **1834** | 0/002592 | 0/016348 | 0/021812 |
| 835 | 0/00278 | 0/016702 | 0/02209 | **1835** | 0/002592 | 0/016348 | 0/021812 |
| 836 | 0/00278 | 0/016702 | 0/02209 | **1836** | 0/002592 | 0/016348 | 0/021812 |
| 837 | 0/00278 | 0/016702 | 0/02209 | **1837** | 0/00259 | 0/016348 | 0/021812 |
| 838 | 0/00278 | 0/016702 | 0/02209 | **1838** | 0/00259 | 0/016348 | 0/021812 |
| 839 | 0/00278 | 0/016702 | 0/02209 | **1839** | 0/00259 | 0/016348 | 0/021812 |
| 840 | 0/00278 | 0/016702 | 0/02209 | **1840** | 0/00259 | 0/016348 | 0/021812 |
| 841 | 0/00278 | 0/016702 | 0/02209 | **1841** | 0/00259 | 0/016348 | 0/021812 |
| 842 | 0/00278 | 0/016702 | 0/02209 | **1842** | 0/00259 | 0/016348 | 0/021812 |
| 843 | 0/00278 | 0/016702 | 0/02209 | **1843** | 0/00259 | 0/016348 | 0/021812 |
| 844 | 0/00278 | 0/016702 | 0/02209 | **1844** | 0/00259 | 0/016348 | 0/021812 |
| 845 | 0/00278 | 0/016702 | 0/02209 | **1845** | 0/00259 | 0/016348 | 0/021812 |
| 846 | 0/00278 | 0/016702 | 0/02209 | **1846** | 0/00259 | 0/016348 | 0/021812 |
| 847 | 0/00278 | 0/016702 | 0/02209 | **1847** | 0/00259 | 0/016348 | 0/021812 |
| 848 | 0/00278 | 0/016702 | 0/02209 | **1848** | 0/00259 | 0/016348 | 0/021812 |
| 849 | 0/00278 | 0/016702 | 0/02209 | **1849** | 0/00259 | 0/016348 | 0/021812 |
| 850 | 0/00278 | 0/016702 | 0/02209 | **1850** | 0/00259 | 0/016348 | 0/021812 |
| 851 | 0/00278 | 0/016702 | 0/02209 | **1851** | 0/00259 | 0/016348 | 0/021812 |
| 852 | 0/00278 | 0/016702 | 0/02209 | **1852** | 0/00259 | 0/016348 | 0/021812 |
| 853 | 0/00278 | 0/016702 | 0/02209 | **1853** | 0/002587 | 0/016348 | 0/021812 |
| 854 | 0/00278 | 0/016702 | 0/02209 | **1854** | 0/002587 | 0/016348 | 0/021812 |
| 855 | 0/00278 | 0/016702 | 0/02209 | **1855** | 0/002587 | 0/016348 | 0/021812 |
| 856 | 0/00278 | 0/016702 | 0/02209 | **1856** | 0/002587 | 0/016348 | 0/021812 |
| 857 | 0/00278 | 0/016702 | 0/02209 | **1857** | 0/002587 | 0/016348 | 0/021812 |
| 858 | 0/00278 | 0/016702 | 0/02209 | **1858** | 0/002587 | 0/016348 | 0/021812 |
| 859 | 0/00278 | 0/016702 | 0/02209 | **1859** | 0/002587 | 0/016348 | 0/021812 |
| 860 | 0/00278 | 0/016702 | 0/02209 | **1860** | 0/002587 | 0/016348 | 0/021812 |
| 861 | 0/00278 | 0/016702 | 0/02209 | **1861** | 0/002587 | 0/016348 | 0/021812 |
| 862 | 0/00278 | 0/016702 | 0/02209 | **1862** | 0/002587 | 0/016348 | 0/021812 |
| 863 | 0/00278 | 0/016702 | 0/02209 | **1863** | 0/002587 | 0/016348 | 0/021812 |
| 864 | 0/00278 | 0/016702 | 0/02209 | **1864** | 0/002587 | 0/016348 | 0/021812 |
| 865 | 0/00278 | 0/016702 | 0/02209 | **1865** | 0/002587 | 0/016348 | 0/021812 |
| 866 | 0/00278 | 0/016702 | 0/02209 | **1866** | 0/002587 | 0/016348 | 0/021812 |
| 867 | 0/00278 | 0/016702 | 0/02209 | **1867** | 0/002587 | 0/016348 | 0/021812 |
| 868 | 0/00278 | 0/016702 | 0/02209 | **1868** | 0/002587 | 0/016348 | 0/021812 |
| 869 | 0/00278 | 0/016702 | 0/02209 | **1869** | 0/002587 | 0/016348 | 0/021695 |
| 870 | 0/00278 | 0/016702 | 0/02209 | **1870** | 0/002587 | 0/016348 | 0/021695 |
| 871 | 0/00278 | 0/016702 | 0/02209 | **1871** | 0/002579 | 0/016348 | 0/021695 |
| 872 | 0/00278 | 0/016702 | 0/02209 | **1872** | 0/002579 | 0/016348 | 0/021695 |
| 873 | 0/00265 | 0/016702 | 0/02209 | **1873** | 0/002579 | 0/016348 | 0/021695 |
| 874 | 0/00265 | 0/016702 | 0/02209 | **1874** | 0/002579 | 0/016348 | 0/021695 |
| 875 | 0/00265 | 0/016702 | 0/02209 | **1875** | 0/002579 | 0/016348 | 0/021695 |
| 876 | 0/00265 | 0/016702 | 0/02209 | **1876** | 0/002579 | 0/016348 | 0/021695 |
| 877 | 0/00265 | 0/016702 | 0/02209 | **1877** | 0/002579 | 0/016348 | 0/021695 |
| 878 | 0/00265 | 0/016702 | 0/02209 | **1878** | 0/002579 | 0/016348 | 0/021695 |
| 879 | 0/00265 | 0/016702 | 0/02209 | **1879** | 0/002579 | 0/016348 | 0/021695 |
| 880 | 0/00265 | 0/016702 | 0/02209 | **1880** | 0/002579 | 0/016348 | 0/021695 |
| 881 | 0/00265 | 0/016702 | 0/02209 | **1881** | 0/002579 | 0/016348 | 0/021695 |
| 882 | 0/00265 | 0/016702 | 0/02209 | **1882** | 0/002579 | 0/016348 | 0/021695 |
| 883 | 0/00265 | 0/016702 | 0/02209 | **1883** | 0/002579 | 0/016348 | 0/021695 |
| 884 | 0/00265 | 0/016702 | 0/02209 | **1884** | 0/002579 | 0/016348 | 0/021695 |
| 885 | 0/00265 | 0/016702 | 0/02209 | **1885** | 0/002579 | 0/016348 | 0/021695 |
| 886 | 0/00265 | 0/016702 | 0/02209 | **1886** | 0/002579 | 0/016348 | 0/021695 |
| 887 | 0/00265 | 0/016702 | 0/02209 | **1887** | 0/002579 | 0/016348 | 0/021695 |
| 888 | 0/00265 | 0/016702 | 0/02209 | **1888** | 0/002579 | 0/016348 | 0/021695 |
| 889 | 0/00265 | 0/016702 | 0/02209 | **1889** | 0/002579 | 0/016348 | 0/021695 |
| 890 | 0/00265 | 0/016702 | 0/02209 | **1890** | 0/002579 | 0/016348 | 0/021695 |
| 891 | 0/00265 | 0/016702 | 0/02209 | **1891** | 0/002579 | 0/016348 | 0/021695 |
| 892 | 0/00265 | 0/016702 | 0/02209 | **1892** | 0/002579 | 0/016348 | 0/021695 |
| 893 | 0/00265 | 0/016702 | 0/02209 | **1893** | 0/002579 | 0/016348 | 0/021695 |
| 894 | 0/00265 | 0/016702 | 0/02209 | **1894** | 0/002579 | 0/016348 | 0/021695 |
| 895 | 0/00265 | 0/016702 | 0/02209 | **1895** | 0/002579 | 0/016348 | 0/021695 |
| 896 | 0/00265 | 0/016702 | 0/02209 | **1896** | 0/002579 | 0/016348 | 0/021695 |
| 897 | 0/00265 | 0/016702 | 0/02209 | **1897** | 0/002579 | 0/016348 | 0/021695 |
| 898 | 0/00265 | 0/016702 | 0/02209 | **1898** | 0/002579 | 0/016348 | 0/021695 |
| 899 | 0/00265 | 0/016702 | 0/02209 | **1899** | 0/002579 | 0/016348 | 0/021695 |
| 900 | 0/00265 | 0/016702 | 0/02209 | **1900** | 0/002579 | 0/016348 | 0/021695 |
| 901 | 0/00265 | 0/016702 | 0/02209 | **1901** | 0/002579 | 0/016348 | 0/021695 |
| 902 | 0/00265 | 0/016702 | 0/02209 | **1902** | 0/002579 | 0/016348 | 0/021695 |
| 903 | 0/00265 | 0/016702 | 0/02209 | **1903** | 0/002579 | 0/016348 | 0/021695 |
| 904 | 0/00265 | 0/016702 | 0/02209 | **1904** | 0/002579 | 0/016348 | 0/021695 |
| 905 | 0/00265 | 0/016702 | 0/02209 | **1905** | 0/002579 | 0/016348 | 0/021695 |
| 906 | 0/00265 | 0/016702 | 0/02209 | **1906** | 0/002579 | 0/016348 | 0/021695 |
| 907 | 0/00265 | 0/016702 | 0/02209 | **1907** | 0/002579 | 0/016348 | 0/021695 |
| 908 | 0/00265 | 0/016702 | 0/02209 | **1908** | 0/002579 | 0/016348 | 0/021695 |
| 909 | 0/00265 | 0/016702 | 0/02209 | **1909** | 0/002579 | 0/016348 | 0/021695 |
| 910 | 0/00265 | 0/016702 | 0/02209 | **1910** | 0/002577 | 0/016348 | 0/021695 |
| 911 | 0/00265 | 0/016702 | 0/02209 | **1911** | 0/002577 | 0/016348 | 0/021695 |
| 912 | 0/00265 | 0/016702 | 0/02209 | **1912** | 0/002577 | 0/016348 | 0/021695 |
| 913 | 0/00265 | 0/016702 | 0/02209 | **1913** | 0/002577 | 0/016348 | 0/021695 |
| 914 | 0/00265 | 0/016702 | 0/02209 | **1914** | 0/002577 | 0/016348 | 0/021695 |
| 915 | 0/00265 | 0/016702 | 0/02209 | **1915** | 0/002576 | 0/016348 | 0/021695 |
| 916 | 0/00265 | 0/016702 | 0/02209 | **1916** | 0/002576 | 0/016348 | 0/021695 |
| 917 | 0/00265 | 0/016702 | 0/02209 | **1917** | 0/002576 | 0/016348 | 0/021695 |
| 918 | 0/00265 | 0/016702 | 0/02209 | **1918** | 0/002576 | 0/016348 | 0/021695 |
| 919 | 0/00265 | 0/016702 | 0/02209 | **1919** | 0/002576 | 0/016348 | 0/021695 |
| 920 | 0/00265 | 0/016702 | 0/02209 | **1920** | 0/002576 | 0/016348 | 0/021695 |
| 921 | 0/00265 | 0/016702 | 0/02209 | **1921** | 0/002576 | 0/016348 | 0/021695 |
| 922 | 0/00265 | 0/016702 | 0/02209 | **1922** | 0/002576 | 0/016348 | 0/021695 |
| 923 | 0/00265 | 0/016702 | 0/02209 | **1923** | 0/002576 | 0/016348 | 0/021695 |
| 924 | 0/00265 | 0/016702 | 0/02209 | **1924** | 0/002576 | 0/016348 | 0/021695 |
| 925 | 0/00265 | 0/016702 | 0/02209 | **1925** | 0/002576 | 0/016348 | 0/021695 |
| 926 | 0/00265 | 0/016702 | 0/02209 | **1926** | 0/002576 | 0/016348 | 0/021695 |
| 927 | 0/00265 | 0/016702 | 0/02209 | **1927** | 0/002576 | 0/016348 | 0/021695 |
| 928 | 0/00265 | 0/016702 | 0/02209 | **1928** | 0/002576 | 0/016348 | 0/021695 |
| 929 | 0/00265 | 0/016702 | 0/02209 | **1929** | 0/002576 | 0/016348 | 0/021695 |
| 930 | 0/00265 | 0/016702 | 0/02209 | **1930** | 0/002576 | 0/016348 | 0/021695 |
| 931 | 0/00265 | 0/016702 | 0/02209 | **1931** | 0/002576 | 0/016348 | 0/021695 |
| 932 | 0/00265 | 0/016702 | 0/02209 | **1932** | 0/002569 | 0/016348 | 0/021695 |
| 933 | 0/00265 | 0/016702 | 0/02209 | **1933** | 0/002569 | 0/016348 | 0/021695 |
| 934 | 0/00265 | 0/016702 | 0/02209 | **1934** | 0/002569 | 0/016348 | 0/021695 |
| 935 | 0/00265 | 0/016702 | 0/02209 | **1935** | 0/002569 | 0/016348 | 0/021695 |
| 936 | 0/00265 | 0/016702 | 0/02209 | **1936** | 0/002569 | 0/016348 | 0/021695 |
| 937 | 0/00265 | 0/016702 | 0/02209 | **1937** | 0/002569 | 0/016348 | 0/021695 |
| 938 | 0/00265 | 0/016702 | 0/02209 | **1938** | 0/002569 | 0/016348 | 0/021695 |
| 939 | 0/00265 | 0/016702 | 0/02209 | **1939** | 0/002569 | 0/016348 | 0/021695 |
| 940 | 0/00265 | 0/016702 | 0/02209 | **1940** | 0/002569 | 0/016348 | 0/021695 |
| 941 | 0/00265 | 0/016702 | 0/02209 | **1941** | 0/002569 | 0/016348 | 0/021695 |
| 942 | 0/00265 | 0/016702 | 0/02209 | **1942** | 0/002569 | 0/016348 | 0/021695 |
| 943 | 0/00265 | 0/016702 | 0/02209 | **1943** | 0/002569 | 0/016348 | 0/021609 |
| 944 | 0/00265 | 0/016702 | 0/02209 | **1944** | 0/002569 | 0/016348 | 0/021609 |
| 945 | 0/00265 | 0/016702 | 0/02209 | **1945** | 0/002569 | 0/016348 | 0/021609 |
| 946 | 0/00265 | 0/016702 | 0/02209 | **1946** | 0/002569 | 0/016348 | 0/021609 |
| 947 | 0/00265 | 0/016702 | 0/02209 | **1947** | 0/002569 | 0/016348 | 0/021609 |
| 948 | 0/00265 | 0/016702 | 0/02209 | **1948** | 0/002564 | 0/016348 | 0/021609 |
| 949 | 0/00265 | 0/016702 | 0/02209 | **1949** | 0/002564 | 0/016348 | 0/021609 |
| 950 | 0/00265 | 0/016702 | 0/02209 | **1950** | 0/002564 | 0/016348 | 0/021609 |
| 951 | 0/00265 | 0/016702 | 0/02209 | **1951** | 0/002564 | 0/016348 | 0/021609 |
| 952 | 0/00265 | 0/016702 | 0/02209 | **1952** | 0/002564 | 0/016348 | 0/021518 |
| 953 | 0/00265 | 0/016702 | 0/02209 | **1953** | 0/002564 | 0/016348 | 0/021518 |
| 954 | 0/00265 | 0/016702 | 0/02209 | **1954** | 0/002564 | 0/016348 | 0/021518 |
| 955 | 0/00265 | 0/016702 | 0/02209 | **1955** | 0/002564 | 0/016348 | 0/021518 |
| 956 | 0/00265 | 0/016702 | 0/02209 | **1956** | 0/002564 | 0/016348 | 0/021518 |
| 957 | 0/00265 | 0/016702 | 0/02209 | **1957** | 0/002564 | 0/016348 | 0/021518 |
| 958 | 0/00265 | 0/016702 | 0/02209 | **1958** | 0/002564 | 0/016348 | 0/021518 |
| 959 | 0/00265 | 0/016702 | 0/02209 | **1959** | 0/002564 | 0/016348 | 0/021518 |
| 960 | 0/00265 | 0/016702 | 0/02209 | **1960** | 0/002564 | 0/016348 | 0/021518 |
| 961 | 0/00265 | 0/016702 | 0/02209 | **1961** | 0/002564 | 0/016348 | 0/021518 |
| 962 | 0/00265 | 0/016702 | 0/02209 | **1962** | 0/002564 | 0/016348 | 0/021518 |
| 963 | 0/00265 | 0/016702 | 0/02209 | **1963** | 0/002564 | 0/016348 | 0/021518 |
| 964 | 0/00265 | 0/016702 | 0/02209 | **1964** | 0/002564 | 0/016348 | 0/021518 |
| 965 | 0/00265 | 0/016702 | 0/02209 | **1965** | 0/002564 | 0/016348 | 0/021518 |
| 966 | 0/00265 | 0/016702 | 0/02209 | **1966** | 0/002564 | 0/016348 | 0/021518 |
| 967 | 0/00265 | 0/016702 | 0/02209 | **1967** | 0/002564 | 0/016348 | 0/021518 |
| 968 | 0/00265 | 0/016702 | 0/02209 | **1968** | 0/002564 | 0/016348 | 0/021518 |
| 969 | 0/00265 | 0/016702 | 0/02209 | **1969** | 0/002564 | 0/016348 | 0/021518 |
| 970 | 0/00265 | 0/016702 | 0/02209 | **1970** | 0/002564 | 0/016348 | 0/021518 |
| 971 | 0/00265 | 0/016702 | 0/02209 | **1971** | 0/002564 | 0/016348 | 0/021518 |
| 972 | 0/00265 | 0/016702 | 0/02209 | **1972** | 0/002564 | 0/016348 | 0/021518 |
| 973 | 0/00265 | 0/016702 | 0/02209 | **1973** | 0/002564 | 0/016348 | 0/021518 |
| 974 | 0/00265 | 0/016702 | 0/02209 | **1974** | 0/002564 | 0/016348 | 0/021518 |
| 975 | 0/00265 | 0/016702 | 0/02209 | **1975** | 0/002564 | 0/016348 | 0/021518 |
| 976 | 0/00265 | 0/016702 | 0/02209 | **1976** | 0/002564 | 0/016348 | 0/021518 |
| 977 | 0/00265 | 0/016702 | 0/02209 | **1977** | 0/002564 | 0/016348 | 0/021518 |
| 978 | 0/00265 | 0/016702 | 0/02209 | **1978** | 0/002564 | 0/016348 | 0/021518 |
| 979 | 0/00265 | 0/016702 | 0/02209 | **1979** | 0/002564 | 0/016348 | 0/021518 |
| 980 | 0/00265 | 0/016702 | 0/02209 | **1980** | 0/002564 | 0/016348 | 0/021518 |
| 981 | 0/00265 | 0/016702 | 0/02209 | **1981** | 0/002564 | 0/016348 | 0/021518 |
| 982 | 0/00265 | 0/016702 | 0/02209 | **1982** | 0/002564 | 0/016348 | 0/021518 |
| 983 | 0/00265 | 0/016702 | 0/02209 | **1983** | 0/002564 | 0/016348 | 0/021518 |
| 984 | 0/00265 | 0/016702 | 0/02209 | **1984** | 0/002564 | 0/016348 | 0/021518 |
| 985 | 0/00265 | 0/016702 | 0/02209 | **1985** | 0/002564 | 0/016348 | 0/021518 |
| 986 | 0/00265 | 0/016702 | 0/02209 | **1986** | 0/002564 | 0/016348 | 0/021518 |
| 987 | 0/00265 | 0/016702 | 0/02209 | **1987** | 0/002564 | 0/016348 | 0/021518 |
| 988 | 0/00265 | 0/016702 | 0/02209 | **1988** | 0/002564 | 0/016348 | 0/021518 |
| 989 | 0/00265 | 0/016702 | 0/02209 | **1989** | 0/002564 | 0/016348 | 0/021518 |
| 990 | 0/00265 | 0/016702 | 0/02209 | **1990** | 0/002564 | 0/016348 | 0/021518 |
| 991 | 0/00265 | 0/016702 | 0/02209 | **1991** | 0/002564 | 0/016348 | 0/021518 |
| 992 | 0/00265 | 0/016702 | 0/02209 | **1992** | 0/002564 | 0/016348 | 0/021518 |
| 993 | 0/00265 | 0/016702 | 0/02209 | **1993** | 0/002564 | 0/016348 | 0/021518 |
| 994 | 0/00265 | 0/016702 | 0/02209 | **1994** | 0/002564 | 0/016348 | 0/021518 |
| 995 | 0/00265 | 0/016702 | 0/02209 | **1995** | 0/002564 | 0/016348 | 0/021518 |
| 996 | 0/00265 | 0/016702 | 0/02209 | **1996** | 0/002564 | 0/016348 | 0/021518 |
| 997 | 0/00265 | 0/016702 | 0/02209 | **1997** | 0/002564 | 0/016348 | 0/021518 |
| 998 | 0/00265 | 0/016702 | 0/02209 | **1998** | 0/002564 | 0/016348 | 0/021518 |
| 999 | 0/00265 | 0/016702 | 0/02209 | **1999** | 0/002564 | 0/016348 | 0/021518 |
| 1000 | 0/00265 | 0/016702 | 0/02209 | **2000** | 0/002564 | 0/016348 | 0/021518 |

Table 14. Cost function convergence for Damage Scenario 2 under varying noise levels - GOA.

| Iterations | 0% Noise | 3% Noise | 10% Noise | Iterations | 0% Noise | 3% Noise | 10% Noise |
| --- | --- | --- | --- | --- | --- | --- | --- |
| 1 | 0/25941433 | 0/210969925 | 0/196508158 | **1001** | 0/011061816 | 0/015664085 | 0/019360797 |
| 2 | 0/200086608 | 0/165092202 | 0/13957057 | **1002** | 0/011061816 | 0/015664085 | 0/019360797 |
| 3 | 0/134542999 | 0/147799743 | 0/104477068 | **1003** | 0/011061816 | 0/015664085 | 0/019360797 |
| 4 | 0/118300091 | 0/116363571 | 0/092995261 | **1004** | 0/011061816 | 0/015664085 | 0/019360797 |
| 5 | 0/086343602 | 0/102653917 | 0/072094542 | **1005** | 0/011061816 | 0/015664085 | 0/019360797 |
| 6 | 0/081833175 | 0/087674934 | 0/056479717 | **1006** | 0/011061816 | 0/015664085 | 0/019360797 |
| 7 | 0/071680593 | 0/074752386 | 0/054372794 | **1007** | 0/011061816 | 0/015664085 | 0/019360797 |
| 8 | 0/071680593 | 0/068424883 | 0/051077276 | **1008** | 0/011061816 | 0/015664085 | 0/019360797 |
| 9 | 0/056086744 | 0/059714087 | 0/04239738 | **1009** | 0/011061816 | 0/015664085 | 0/019360797 |
| 10 | 0/056086744 | 0/05434505 | 0/04239738 | **1010** | 0/011061816 | 0/015664085 | 0/019360797 |
| 11 | 0/046412311 | 0/05434505 | 0/04239738 | **1011** | 0/011061816 | 0/015664085 | 0/019360797 |
| 12 | 0/035502052 | 0/048390982 | 0/04239738 | **1012** | 0/011061816 | 0/015664085 | 0/019360797 |
| 13 | 0/031875068 | 0/04815218 | 0/032905256 | **1013** | 0/011061816 | 0/015664085 | 0/019360797 |
| 14 | 0/031875068 | 0/045454989 | 0/032905256 | **1014** | 0/011061816 | 0/015664085 | 0/019360797 |
| 15 | 0/028621611 | 0/041973796 | 0/031385842 | **1015** | 0/011061816 | 0/015664085 | 0/019360797 |
| 16 | 0/021760317 | 0/041973796 | 0/031385842 | **1016** | 0/011061816 | 0/015664085 | 0/019360797 |
| 17 | 0/021760317 | 0/041973796 | 0/028278637 | **1017** | 0/011061816 | 0/015664085 | 0/019360797 |
| 18 | 0/021760317 | 0/041973796 | 0/028278637 | **1018** | 0/011061816 | 0/015664085 | 0/019360797 |
| 19 | 0/021760317 | 0/041973796 | 0/028278637 | **1019** | 0/011061816 | 0/015664085 | 0/019360797 |
| 20 | 0/021760317 | 0/041973796 | 0/028278637 | **1020** | 0/011061816 | 0/015664085 | 0/019360797 |
| 21 | 0/021760317 | 0/041973796 | 0/028278637 | **1021** | 0/011061816 | 0/015664085 | 0/019360797 |
| 22 | 0/021760317 | 0/041973796 | 0/028278637 | **1022** | 0/011061816 | 0/015664085 | 0/019360797 |
| 23 | 0/021760317 | 0/041973796 | 0/028278637 | **1023** | 0/011061816 | 0/015664085 | 0/019360797 |
| 24 | 0/021760317 | 0/040152714 | 0/028278637 | **1024** | 0/011061816 | 0/015664085 | 0/019228418 |
| 25 | 0/021760317 | 0/036622739 | 0/028278637 | **1025** | 0/011061816 | 0/015664085 | 0/019228418 |
| 26 | 0/020318927 | 0/028199251 | 0/028278637 | **1026** | 0/011061816 | 0/015664085 | 0/019228418 |
| 27 | 0/020318927 | 0/028199251 | 0/028278637 | **1027** | 0/011061816 | 0/015664085 | 0/019228418 |
| 28 | 0/020318927 | 0/028022535 | 0/028278637 | **1028** | 0/011061816 | 0/015664085 | 0/019228418 |
| 29 | 0/020318927 | 0/027697195 | 0/028278637 | **1029** | 0/011061816 | 0/015664085 | 0/019228418 |
| 30 | 0/020318927 | 0/0254535 | 0/028278637 | **1030** | 0/011061816 | 0/015664085 | 0/019228418 |
| 31 | 0/020318927 | 0/0254535 | 0/028278637 | **1031** | 0/011061816 | 0/015664085 | 0/019228418 |
| 32 | 0/020318927 | 0/0254535 | 0/028278637 | **1032** | 0/011061816 | 0/015664085 | 0/019228418 |
| 33 | 0/018826533 | 0/022682723 | 0/028278637 | **1033** | 0/011061816 | 0/015664085 | 0/019228418 |
| 34 | 0/017334763 | 0/022682723 | 0/028278637 | **1034** | 0/011061816 | 0/015664085 | 0/019228418 |
| 35 | 0/017334763 | 0/022682723 | 0/028278637 | **1035** | 0/011061816 | 0/015664085 | 0/019228418 |
| 36 | 0/017334763 | 0/022053378 | 0/028278637 | **1036** | 0/011061816 | 0/015664085 | 0/019228418 |
| 37 | 0/016020905 | 0/022053378 | 0/028278637 | **1037** | 0/011061816 | 0/015664085 | 0/019228418 |
| 38 | 0/016020905 | 0/022053378 | 0/028278637 | **1038** | 0/011061816 | 0/015664085 | 0/019228418 |
| 39 | 0/016020905 | 0/021478163 | 0/028278637 | **1039** | 0/011061816 | 0/015664085 | 0/019228418 |
| 40 | 0/016020905 | 0/021478163 | 0/028278637 | **1040** | 0/011061816 | 0/015664085 | 0/019228418 |
| 41 | 0/016020905 | 0/021478163 | 0/028278637 | **1041** | 0/011061816 | 0/015664085 | 0/019228418 |
| 42 | 0/016020905 | 0/019126246 | 0/028278637 | **1042** | 0/011061816 | 0/015664085 | 0/019228418 |
| 43 | 0/016020905 | 0/019126246 | 0/028278637 | **1043** | 0/011061816 | 0/015664085 | 0/019228418 |
| 44 | 0/016020905 | 0/019126246 | 0/028278637 | **1044** | 0/011061816 | 0/015664085 | 0/019228418 |
| 45 | 0/016020905 | 0/019126246 | 0/028278637 | **1045** | 0/011061816 | 0/015664085 | 0/019228418 |
| 46 | 0/013887872 | 0/019126246 | 0/028278637 | **1046** | 0/011061816 | 0/015664085 | 0/019228418 |
| 47 | 0/013887872 | 0/019126246 | 0/028278637 | **1047** | 0/011061816 | 0/015664085 | 0/019228418 |
| 48 | 0/013887872 | 0/019126246 | 0/028278637 | **1048** | 0/011061816 | 0/015664085 | 0/019228418 |
| 49 | 0/013887872 | 0/019126246 | 0/028278637 | **1049** | 0/011061816 | 0/015664085 | 0/019228418 |
| 50 | 0/013887872 | 0/019126246 | 0/028278637 | **1050** | 0/011061816 | 0/015664085 | 0/019228418 |
| 51 | 0/013887872 | 0/019126246 | 0/028278637 | **1051** | 0/011061816 | 0/015664085 | 0/019228418 |
| 52 | 0/013887872 | 0/019126246 | 0/028278637 | **1052** | 0/011061816 | 0/015664085 | 0/019228418 |
| 53 | 0/013887872 | 0/019126246 | 0/028278637 | **1053** | 0/011061816 | 0/015664085 | 0/019228418 |
| 54 | 0/013887872 | 0/019126246 | 0/028278637 | **1054** | 0/011061816 | 0/015664085 | 0/019228418 |
| 55 | 0/013887872 | 0/019126246 | 0/028278637 | **1055** | 0/011061816 | 0/015664085 | 0/019228418 |
| 56 | 0/013887872 | 0/018767831 | 0/028278637 | **1056** | 0/011061816 | 0/015664085 | 0/019228418 |
| 57 | 0/013887872 | 0/018767831 | 0/028278637 | **1057** | 0/011061816 | 0/015664085 | 0/019228418 |
| 58 | 0/013887872 | 0/018767831 | 0/028278637 | **1058** | 0/011061816 | 0/015664085 | 0/019228418 |
| 59 | 0/013253794 | 0/018767831 | 0/028278637 | **1059** | 0/011061816 | 0/015664085 | 0/019228418 |
| 60 | 0/013253794 | 0/018767831 | 0/027505009 | **1060** | 0/011061816 | 0/015664085 | 0/019228418 |
| 61 | 0/013253794 | 0/018767831 | 0/027505009 | **1061** | 0/011061816 | 0/015664085 | 0/019228418 |
| 62 | 0/013253794 | 0/018767831 | 0/027505009 | **1062** | 0/011061816 | 0/015664085 | 0/019228418 |
| 63 | 0/013253794 | 0/018767831 | 0/027505009 | **1063** | 0/011061816 | 0/015664085 | 0/019228418 |
| 64 | 0/013253794 | 0/018767831 | 0/027505009 | **1064** | 0/011061816 | 0/015664085 | 0/019228418 |
| 65 | 0/013253794 | 0/018767831 | 0/027505009 | **1065** | 0/011061816 | 0/015664085 | 0/019228418 |
| 66 | 0/013253794 | 0/018767831 | 0/027505009 | **1066** | 0/011061816 | 0/015664085 | 0/019228418 |
| 67 | 0/013253794 | 0/018767831 | 0/027505009 | **1067** | 0/011061816 | 0/015664085 | 0/019228418 |
| 68 | 0/013253794 | 0/018767831 | 0/027505009 | **1068** | 0/011061816 | 0/015664085 | 0/019228418 |
| 69 | 0/013253794 | 0/018767831 | 0/027505009 | **1069** | 0/011061816 | 0/015664085 | 0/019228418 |
| 70 | 0/013253794 | 0/018767831 | 0/027505009 | **1070** | 0/011061816 | 0/015664085 | 0/019228418 |
| 71 | 0/013253794 | 0/018767831 | 0/027505009 | **1071** | 0/011061816 | 0/015664085 | 0/019228418 |
| 72 | 0/013253794 | 0/018767831 | 0/027505009 | **1072** | 0/011061816 | 0/015664085 | 0/019228418 |
| 73 | 0/013253794 | 0/018767831 | 0/027505009 | **1073** | 0/011061816 | 0/015664085 | 0/019228418 |
| 74 | 0/013253794 | 0/018767831 | 0/027505009 | **1074** | 0/011061816 | 0/015664085 | 0/019228418 |
| 75 | 0/013253794 | 0/018767831 | 0/027505009 | **1075** | 0/011061816 | 0/015664085 | 0/019228418 |
| 76 | 0/013253794 | 0/018767831 | 0/027505009 | **1076** | 0/011061816 | 0/015664085 | 0/019228418 |
| 77 | 0/013253794 | 0/018767831 | 0/027505009 | **1077** | 0/011061816 | 0/015664085 | 0/019228418 |
| 78 | 0/013253794 | 0/018767831 | 0/027505009 | **1078** | 0/011061816 | 0/015664085 | 0/019228418 |
| 79 | 0/013253794 | 0/018767831 | 0/027505009 | **1079** | 0/011061816 | 0/015664085 | 0/019228418 |
| 80 | 0/013253794 | 0/018581218 | 0/027505009 | **1080** | 0/011061816 | 0/015664085 | 0/019228418 |
| 81 | 0/013253794 | 0/018581218 | 0/027505009 | **1081** | 0/011061816 | 0/015664085 | 0/019228418 |
| 82 | 0/013253794 | 0/018581218 | 0/027505009 | **1082** | 0/011061816 | 0/015664085 | 0/019228418 |
| 83 | 0/013253794 | 0/018581218 | 0/027505009 | **1083** | 0/011061816 | 0/015664085 | 0/019228418 |
| 84 | 0/013253794 | 0/018581218 | 0/027505009 | **1084** | 0/011061816 | 0/015664085 | 0/019228418 |
| 85 | 0/012390912 | 0/018581218 | 0/027505009 | **1085** | 0/011061816 | 0/015664085 | 0/019228418 |
| 86 | 0/012390912 | 0/018069383 | 0/027505009 | **1086** | 0/011061816 | 0/015664085 | 0/018848022 |
| 87 | 0/012390912 | 0/018069383 | 0/027505009 | **1087** | 0/011061816 | 0/015664085 | 0/018848022 |
| 88 | 0/012390912 | 0/018069383 | 0/027505009 | **1088** | 0/011061816 | 0/015664085 | 0/018848022 |
| 89 | 0/012390912 | 0/018069383 | 0/027505009 | **1089** | 0/011061816 | 0/015664085 | 0/018848022 |
| 90 | 0/012390912 | 0/018069383 | 0/027505009 | **1090** | 0/011061816 | 0/015664085 | 0/018848022 |
| 91 | 0/012390912 | 0/018069383 | 0/027505009 | **1091** | 0/011061816 | 0/015664085 | 0/018848022 |
| 92 | 0/012390912 | 0/018069383 | 0/027009771 | **1092** | 0/011061816 | 0/015664085 | 0/018848022 |
| 93 | 0/012390912 | 0/018069383 | 0/027009771 | **1093** | 0/011061816 | 0/015664085 | 0/018848022 |
| 94 | 0/012390912 | 0/018069383 | 0/027009771 | **1094** | 0/011061816 | 0/015664085 | 0/018848022 |
| 95 | 0/012390912 | 0/018069383 | 0/027009771 | **1095** | 0/011061816 | 0/015664085 | 0/018848022 |
| 96 | 0/012390912 | 0/018069383 | 0/027009771 | **1096** | 0/011061816 | 0/015664085 | 0/018848022 |
| 97 | 0/012390912 | 0/018069383 | 0/027009771 | **1097** | 0/011061816 | 0/015664085 | 0/018848022 |
| 98 | 0/012390912 | 0/018069383 | 0/027009771 | **1098** | 0/011061816 | 0/015664085 | 0/018848022 |
| 99 | 0/012390912 | 0/018069383 | 0/026951124 | **1099** | 0/011061816 | 0/015664085 | 0/018848022 |
| 100 | 0/012390912 | 0/018069383 | 0/026951124 | **1100** | 0/011061816 | 0/015664085 | 0/018848022 |
| 101 | 0/012390912 | 0/018069383 | 0/026951124 | **1101** | 0/011061816 | 0/015664085 | 0/018848022 |
| 102 | 0/012390912 | 0/018069383 | 0/026951124 | **1102** | 0/011061816 | 0/015664085 | 0/018848022 |
| 103 | 0/012193856 | 0/018069383 | 0/026951124 | **1103** | 0/011061816 | 0/015664085 | 0/018848022 |
| 104 | 0/012193856 | 0/018069383 | 0/026951124 | **1104** | 0/011061816 | 0/015664085 | 0/018848022 |
| 105 | 0/012193856 | 0/018069383 | 0/026951124 | **1105** | 0/011061816 | 0/015664085 | 0/018848022 |
| 106 | 0/012193856 | 0/018069383 | 0/026951124 | **1106** | 0/011061816 | 0/015664085 | 0/018848022 |
| 107 | 0/012193856 | 0/018069383 | 0/026441206 | **1107** | 0/011061816 | 0/015664085 | 0/018848022 |
| 108 | 0/012193856 | 0/018069383 | 0/026441206 | **1108** | 0/011061816 | 0/015664085 | 0/018848022 |
| 109 | 0/012193856 | 0/018069383 | 0/026441206 | **1109** | 0/011061816 | 0/015664085 | 0/018848022 |
| 110 | 0/012193856 | 0/017541973 | 0/026441206 | **1110** | 0/011061816 | 0/015664085 | 0/018848022 |
| 111 | 0/012193856 | 0/017541973 | 0/026441206 | **1111** | 0/011061816 | 0/015664085 | 0/018848022 |
| 112 | 0/012193856 | 0/017541973 | 0/026441206 | **1112** | 0/011061816 | 0/015664085 | 0/018848022 |
| 113 | 0/012193856 | 0/017541973 | 0/026441206 | **1113** | 0/011061816 | 0/015664085 | 0/018848022 |
| 114 | 0/012193856 | 0/017541973 | 0/026441206 | **1114** | 0/011061816 | 0/015664085 | 0/018848022 |
| 115 | 0/012193856 | 0/017541973 | 0/026441206 | **1115** | 0/011061816 | 0/015664085 | 0/018848022 |
| 116 | 0/012193856 | 0/017541973 | 0/026441206 | **1116** | 0/011061816 | 0/015664085 | 0/018848022 |
| 117 | 0/012193856 | 0/017541973 | 0/026441206 | **1117** | 0/011061816 | 0/015664085 | 0/018848022 |
| 118 | 0/012193856 | 0/017541973 | 0/026441206 | **1118** | 0/011061816 | 0/015664085 | 0/018848022 |
| 119 | 0/012193856 | 0/017541973 | 0/026441206 | **1119** | 0/011061816 | 0/015664085 | 0/018848022 |
| 120 | 0/012193856 | 0/017541973 | 0/026441206 | **1120** | 0/011061816 | 0/015664085 | 0/018848022 |
| 121 | 0/012193856 | 0/017541973 | 0/026441206 | **1121** | 0/011061816 | 0/015664085 | 0/018848022 |
| 122 | 0/012193856 | 0/017541973 | 0/026441206 | **1122** | 0/011061816 | 0/015664085 | 0/018848022 |
| 123 | 0/012193856 | 0/017541973 | 0/026441206 | **1123** | 0/011061816 | 0/015664085 | 0/018848022 |
| 124 | 0/012193856 | 0/017479579 | 0/026023094 | **1124** | 0/011061816 | 0/015664085 | 0/018848022 |
| 125 | 0/012193856 | 0/017479579 | 0/026023094 | **1125** | 0/011061816 | 0/015664085 | 0/018848022 |
| 126 | 0/012193856 | 0/017479579 | 0/026023094 | **1126** | 0/011061816 | 0/015664085 | 0/018848022 |
| 127 | 0/012193856 | 0/017479579 | 0/026023094 | **1127** | 0/011061816 | 0/015664085 | 0/018848022 |
| 128 | 0/012193856 | 0/017479579 | 0/026023094 | **1128** | 0/011061816 | 0/015664085 | 0/018848022 |
| 129 | 0/012193856 | 0/017479579 | 0/026023094 | **1129** | 0/011061816 | 0/015664085 | 0/018848022 |
| 130 | 0/012193856 | 0/017479579 | 0/026023094 | **1130** | 0/011061816 | 0/015664085 | 0/018848022 |
| 131 | 0/012193856 | 0/017479579 | 0/026023094 | **1131** | 0/011061816 | 0/015664085 | 0/018848022 |
| 132 | 0/012193856 | 0/017479579 | 0/026023094 | **1132** | 0/011061816 | 0/015664085 | 0/018848022 |
| 133 | 0/012193856 | 0/017479579 | 0/026023094 | **1133** | 0/011061816 | 0/015664085 | 0/018848022 |
| 134 | 0/012193856 | 0/017479579 | 0/026023094 | **1134** | 0/011061816 | 0/015664085 | 0/018848022 |
| 135 | 0/012193856 | 0/017479579 | 0/026023094 | **1135** | 0/011061816 | 0/015664085 | 0/018848022 |
| 136 | 0/012193856 | 0/017479579 | 0/026023094 | **1136** | 0/011061816 | 0/015664085 | 0/018848022 |
| 137 | 0/012193856 | 0/017479579 | 0/026023094 | **1137** | 0/011061816 | 0/015664085 | 0/018848022 |
| 138 | 0/012193856 | 0/017479579 | 0/026023094 | **1138** | 0/011061816 | 0/015664085 | 0/018848022 |
| 139 | 0/012193856 | 0/016903451 | 0/026023094 | **1139** | 0/011061816 | 0/015664085 | 0/018848022 |
| 140 | 0/012193856 | 0/016903451 | 0/026023094 | **1140** | 0/011061816 | 0/015664085 | 0/018848022 |
| 141 | 0/012193856 | 0/016903451 | 0/026023094 | **1141** | 0/011061816 | 0/015664085 | 0/018848022 |
| 142 | 0/012193856 | 0/016903451 | 0/026023094 | **1142** | 0/011061816 | 0/015664085 | 0/018848022 |
| 143 | 0/012193856 | 0/016903451 | 0/026023094 | **1143** | 0/011061816 | 0/015664085 | 0/018848022 |
| 144 | 0/012193856 | 0/016903451 | 0/026023094 | **1144** | 0/011061816 | 0/015664085 | 0/018848022 |
| 145 | 0/012193856 | 0/016903451 | 0/026023094 | **1145** | 0/011061816 | 0/015664085 | 0/018848022 |
| 146 | 0/012193856 | 0/016903451 | 0/026023094 | **1146** | 0/011000255 | 0/015664085 | 0/018848022 |
| 147 | 0/012193856 | 0/016903451 | 0/026023094 | **1147** | 0/011000255 | 0/015664085 | 0/018707928 |
| 148 | 0/012193856 | 0/016903451 | 0/026023094 | **1148** | 0/011000255 | 0/015664085 | 0/018707928 |
| 149 | 0/012193856 | 0/016903451 | 0/026023094 | **1149** | 0/011000255 | 0/015664085 | 0/018707928 |
| 150 | 0/012193856 | 0/016903451 | 0/026023094 | **1150** | 0/011000255 | 0/015664085 | 0/018707928 |
| 151 | 0/012193856 | 0/016903451 | 0/026023094 | **1151** | 0/011000255 | 0/015664085 | 0/018707928 |
| 152 | 0/012193856 | 0/016903451 | 0/025261861 | **1152** | 0/011000255 | 0/015664085 | 0/018707928 |
| 153 | 0/012193856 | 0/016903451 | 0/025261861 | **1153** | 0/011000255 | 0/015664085 | 0/018707928 |
| 154 | 0/012193856 | 0/016903451 | 0/025261861 | **1154** | 0/011000255 | 0/015664085 | 0/018707928 |
| 155 | 0/012193856 | 0/016903451 | 0/025261861 | **1155** | 0/011000255 | 0/015664085 | 0/018707928 |
| 156 | 0/012193856 | 0/016903451 | 0/025261861 | **1156** | 0/011000255 | 0/015664085 | 0/018707928 |
| 157 | 0/012193856 | 0/016903451 | 0/025261861 | **1157** | 0/011000255 | 0/015664085 | 0/018707928 |
| 158 | 0/012193856 | 0/016903451 | 0/025261861 | **1158** | 0/011000255 | 0/015664085 | 0/018707928 |
| 159 | 0/012193856 | 0/016903451 | 0/025261861 | **1159** | 0/011000255 | 0/015664085 | 0/018707928 |
| 160 | 0/012193856 | 0/016903451 | 0/025261861 | **1160** | 0/011000255 | 0/015664085 | 0/018707928 |
| 161 | 0/012193856 | 0/016903451 | 0/025261861 | **1161** | 0/011000255 | 0/015664085 | 0/018707928 |
| 162 | 0/012193856 | 0/016903451 | 0/025261861 | **1162** | 0/011000255 | 0/015664085 | 0/018707928 |
| 163 | 0/012193856 | 0/016903451 | 0/025261861 | **1163** | 0/011000255 | 0/015664085 | 0/018707928 |
| 164 | 0/012193856 | 0/016903451 | 0/025261861 | **1164** | 0/011000255 | 0/015664085 | 0/018707928 |
| 165 | 0/012193856 | 0/016903451 | 0/025261861 | **1165** | 0/011000255 | 0/015664085 | 0/018707928 |
| 166 | 0/012193856 | 0/016903451 | 0/025261861 | **1166** | 0/011000255 | 0/015664085 | 0/018707928 |
| 167 | 0/012193856 | 0/016903451 | 0/025261861 | **1167** | 0/011000255 | 0/015664085 | 0/018707928 |
| 168 | 0/012193856 | 0/016903451 | 0/025261861 | **1168** | 0/011000255 | 0/015664085 | 0/018707928 |
| 169 | 0/012193856 | 0/016903451 | 0/025261861 | **1169** | 0/011000255 | 0/015664085 | 0/018707928 |
| 170 | 0/011970766 | 0/016903451 | 0/025261861 | **1170** | 0/011000255 | 0/015664085 | 0/018707928 |
| 171 | 0/011970766 | 0/016903451 | 0/025261861 | **1171** | 0/011000255 | 0/015664085 | 0/018707928 |
| 172 | 0/011970766 | 0/016903451 | 0/025261861 | **1172** | 0/011000255 | 0/015664085 | 0/018707928 |
| 173 | 0/011970766 | 0/016903451 | 0/025261861 | **1173** | 0/011000255 | 0/015664085 | 0/018707928 |
| 174 | 0/011970766 | 0/016903451 | 0/025261861 | **1174** | 0/011000255 | 0/015664085 | 0/018707928 |
| 175 | 0/011970766 | 0/016903451 | 0/025261861 | **1175** | 0/011000255 | 0/015664085 | 0/018707928 |
| 176 | 0/011970766 | 0/016903451 | 0/025261861 | **1176** | 0/011000255 | 0/015664085 | 0/018707928 |
| 177 | 0/011970766 | 0/016903451 | 0/025261861 | **1177** | 0/011000255 | 0/015664085 | 0/018707928 |
| 178 | 0/011970766 | 0/016903451 | 0/025261861 | **1178** | 0/011000255 | 0/015664085 | 0/018707928 |
| 179 | 0/011970766 | 0/016903451 | 0/025261861 | **1179** | 0/011000255 | 0/015664085 | 0/018707928 |
| 180 | 0/011970766 | 0/016903451 | 0/025261861 | **1180** | 0/011000255 | 0/015664085 | 0/018707928 |
| 181 | 0/011970766 | 0/016903451 | 0/025261861 | **1181** | 0/011000255 | 0/015664085 | 0/018707928 |
| 182 | 0/011970766 | 0/016903451 | 0/025261861 | **1182** | 0/011000255 | 0/015664085 | 0/018707928 |
| 183 | 0/011970766 | 0/016903451 | 0/025261861 | **1183** | 0/011000255 | 0/015664085 | 0/018707928 |
| 184 | 0/011970766 | 0/016903451 | 0/025261861 | **1184** | 0/011000255 | 0/015664085 | 0/018707928 |
| 185 | 0/011970766 | 0/016903451 | 0/025261861 | **1185** | 0/011000255 | 0/015664085 | 0/018707928 |
| 186 | 0/011970766 | 0/016903451 | 0/025261861 | **1186** | 0/011000255 | 0/015664085 | 0/018707928 |
| 187 | 0/011970766 | 0/016903451 | 0/025261861 | **1187** | 0/011000255 | 0/015664085 | 0/018707928 |
| 188 | 0/011970766 | 0/016903451 | 0/025261861 | **1188** | 0/011000255 | 0/015664085 | 0/018707928 |
| 189 | 0/011970766 | 0/016903451 | 0/025261861 | **1189** | 0/011000255 | 0/015664085 | 0/018707928 |
| 190 | 0/011970766 | 0/016903451 | 0/025261861 | **1190** | 0/011000255 | 0/015664085 | 0/018707928 |
| 191 | 0/011970766 | 0/016903451 | 0/025261861 | **1191** | 0/011000255 | 0/015664085 | 0/018707928 |
| 192 | 0/011970766 | 0/016903451 | 0/025261861 | **1192** | 0/011000255 | 0/015664085 | 0/018707928 |
| 193 | 0/011970766 | 0/016903451 | 0/025261861 | **1193** | 0/011000255 | 0/015664085 | 0/018707928 |
| 194 | 0/011970766 | 0/016903451 | 0/025261861 | **1194** | 0/011000255 | 0/015664085 | 0/018707928 |
| 195 | 0/011970766 | 0/016903451 | 0/025261861 | **1195** | 0/011000255 | 0/015664085 | 0/018707928 |
| 196 | 0/011970766 | 0/016903451 | 0/025261861 | **1196** | 0/011000255 | 0/015664085 | 0/018707928 |
| 197 | 0/011970766 | 0/016903451 | 0/025261861 | **1197** | 0/011000255 | 0/015664085 | 0/018707928 |
| 198 | 0/011970766 | 0/016903451 | 0/025261861 | **1198** | 0/011000255 | 0/015664085 | 0/018707928 |
| 199 | 0/011970766 | 0/016903451 | 0/025261861 | **1199** | 0/011000255 | 0/015664085 | 0/018707928 |
| 200 | 0/011970766 | 0/016903451 | 0/025261861 | **1200** | 0/011000255 | 0/015664085 | 0/018707928 |
| 201 | 0/011970766 | 0/016903451 | 0/025261861 | **1201** | 0/011000255 | 0/015664085 | 0/018707928 |
| 202 | 0/011970766 | 0/016903451 | 0/025261861 | **1202** | 0/011000255 | 0/015664085 | 0/018707928 |
| 203 | 0/011970766 | 0/016903451 | 0/025261861 | **1203** | 0/011000255 | 0/015664085 | 0/018707928 |
| 204 | 0/011970766 | 0/016903451 | 0/025261861 | **1204** | 0/011000255 | 0/015664085 | 0/018707928 |
| 205 | 0/011970766 | 0/016903451 | 0/025261861 | **1205** | 0/011000255 | 0/015664085 | 0/018707928 |
| 206 | 0/011970766 | 0/016903451 | 0/025261861 | **1206** | 0/011000255 | 0/015664085 | 0/018707928 |
| 207 | 0/011970766 | 0/016903451 | 0/025110122 | **1207** | 0/011000255 | 0/015664085 | 0/018707928 |
| 208 | 0/011970766 | 0/016903451 | 0/025110122 | **1208** | 0/011000255 | 0/015664085 | 0/018707928 |
| 209 | 0/011970766 | 0/016903451 | 0/025110122 | **1209** | 0/011000255 | 0/015664085 | 0/018707928 |
| 210 | 0/011970766 | 0/016903451 | 0/025110122 | **1210** | 0/011000255 | 0/015664085 | 0/018707928 |
| 211 | 0/011970766 | 0/016903451 | 0/025110122 | **1211** | 0/011000255 | 0/015664085 | 0/018707928 |
| 212 | 0/011970766 | 0/016903451 | 0/025110122 | **1212** | 0/011000255 | 0/015664085 | 0/018707928 |
| 213 | 0/011970766 | 0/016903451 | 0/025110122 | **1213** | 0/011000255 | 0/015664085 | 0/018707928 |
| 214 | 0/011970766 | 0/016903451 | 0/025110122 | **1214** | 0/011000255 | 0/015664085 | 0/018707928 |
| 215 | 0/011970766 | 0/016903451 | 0/025110122 | **1215** | 0/011000255 | 0/015664085 | 0/018707928 |
| 216 | 0/011970766 | 0/016903451 | 0/025110122 | **1216** | 0/011000255 | 0/015664085 | 0/018707928 |
| 217 | 0/011970766 | 0/016903451 | 0/025110122 | **1217** | 0/011000255 | 0/015664085 | 0/018707928 |
| 218 | 0/011970766 | 0/016903451 | 0/025110122 | **1218** | 0/011000255 | 0/015664085 | 0/018707928 |
| 219 | 0/011970766 | 0/016903451 | 0/025110122 | **1219** | 0/011000255 | 0/015664085 | 0/018707928 |
| 220 | 0/011970766 | 0/016903451 | 0/025110122 | **1220** | 0/011000255 | 0/015664085 | 0/018707928 |
| 221 | 0/011970766 | 0/016903451 | 0/025110122 | **1221** | 0/011000255 | 0/015664085 | 0/018707928 |
| 222 | 0/011970766 | 0/016903451 | 0/025110122 | **1222** | 0/011000255 | 0/015664085 | 0/018707928 |
| 223 | 0/011970766 | 0/016903451 | 0/025110122 | **1223** | 0/011000255 | 0/015664085 | 0/018707928 |
| 224 | 0/011970766 | 0/016903451 | 0/025110122 | **1224** | 0/011000255 | 0/015664085 | 0/018707928 |
| 225 | 0/011970766 | 0/016903451 | 0/025110122 | **1225** | 0/011000255 | 0/015664085 | 0/018707928 |
| 226 | 0/011970766 | 0/016656157 | 0/025110122 | **1226** | 0/011000255 | 0/015664085 | 0/018707928 |
| 227 | 0/011970766 | 0/016656157 | 0/025110122 | **1227** | 0/011000255 | 0/015664085 | 0/018707928 |
| 228 | 0/011970766 | 0/016656157 | 0/025110122 | **1228** | 0/011000255 | 0/015664085 | 0/018707928 |
| 229 | 0/011970766 | 0/016656157 | 0/025110122 | **1229** | 0/011000255 | 0/015664085 | 0/018707928 |
| 230 | 0/011970766 | 0/016656157 | 0/025110122 | **1230** | 0/011000255 | 0/015664085 | 0/018707928 |
| 231 | 0/011970766 | 0/016656157 | 0/025110122 | **1231** | 0/011000255 | 0/015664085 | 0/018707928 |
| 232 | 0/011970766 | 0/016656157 | 0/025110122 | **1232** | 0/011000255 | 0/015664085 | 0/018707928 |
| 233 | 0/011970766 | 0/016656157 | 0/025110122 | **1233** | 0/011000255 | 0/015664085 | 0/018707928 |
| 234 | 0/011970766 | 0/016656157 | 0/025110122 | **1234** | 0/011000255 | 0/015664085 | 0/018707928 |
| 235 | 0/011970766 | 0/016656157 | 0/025110122 | **1235** | 0/011000255 | 0/015664085 | 0/018707928 |
| 236 | 0/011970766 | 0/016656157 | 0/025110122 | **1236** | 0/011000255 | 0/015664085 | 0/018707928 |
| 237 | 0/011970766 | 0/016656157 | 0/025110122 | **1237** | 0/011000255 | 0/015664085 | 0/018707928 |
| 238 | 0/011970766 | 0/016656157 | 0/025110122 | **1238** | 0/011000255 | 0/015664085 | 0/018707928 |
| 239 | 0/011970766 | 0/016656157 | 0/025110122 | **1239** | 0/011000255 | 0/015664085 | 0/018707928 |
| 240 | 0/011970766 | 0/016656157 | 0/025110122 | **1240** | 0/011000255 | 0/015664085 | 0/018707928 |
| 241 | 0/011970766 | 0/016656157 | 0/025110122 | **1241** | 0/011000255 | 0/015664085 | 0/018707928 |
| 242 | 0/011970766 | 0/016656157 | 0/025110122 | **1242** | 0/011000255 | 0/015664085 | 0/018707928 |
| 243 | 0/011970766 | 0/016656157 | 0/025110122 | **1243** | 0/011000255 | 0/015664085 | 0/018707928 |
| 244 | 0/011970766 | 0/016656157 | 0/025110122 | **1244** | 0/011000255 | 0/015664085 | 0/018707928 |
| 245 | 0/011970766 | 0/016656157 | 0/025110122 | **1245** | 0/011000255 | 0/015664085 | 0/018707928 |
| 246 | 0/011970766 | 0/016656157 | 0/025110122 | **1246** | 0/011000255 | 0/015664085 | 0/018707928 |
| 247 | 0/011970766 | 0/016656157 | 0/025110122 | **1247** | 0/011000255 | 0/015664085 | 0/018707928 |
| 248 | 0/011970766 | 0/016656157 | 0/025110122 | **1248** | 0/011000255 | 0/015664085 | 0/018707928 |
| 249 | 0/011970766 | 0/016656157 | 0/025110122 | **1249** | 0/011000255 | 0/015664085 | 0/018707928 |
| 250 | 0/011970766 | 0/016656157 | 0/025110122 | **1250** | 0/011000255 | 0/015664085 | 0/018707928 |
| 251 | 0/011970766 | 0/016656157 | 0/025110122 | **1251** | 0/011000255 | 0/015664085 | 0/018707928 |
| 252 | 0/011970766 | 0/016656157 | 0/025110122 | **1252** | 0/011000255 | 0/015664085 | 0/018707928 |
| 253 | 0/011970766 | 0/016656157 | 0/025110122 | **1253** | 0/011000255 | 0/015664085 | 0/018452018 |
| 254 | 0/011970766 | 0/016656157 | 0/025110122 | **1254** | 0/011000255 | 0/015664085 | 0/018452018 |
| 255 | 0/011970766 | 0/016656157 | 0/024827785 | **1255** | 0/011000255 | 0/015664085 | 0/018452018 |
| 256 | 0/011970766 | 0/016656157 | 0/024827785 | **1256** | 0/011000255 | 0/015664085 | 0/018452018 |
| 257 | 0/011970766 | 0/016656157 | 0/024827785 | **1257** | 0/011000255 | 0/015664085 | 0/018452018 |
| 258 | 0/011970766 | 0/016656157 | 0/024827785 | **1258** | 0/011000255 | 0/015664085 | 0/018452018 |
| 259 | 0/011970766 | 0/016656157 | 0/024827785 | **1259** | 0/011000255 | 0/015664085 | 0/018452018 |
| 260 | 0/011970766 | 0/016656157 | 0/024827785 | **1260** | 0/011000255 | 0/015664085 | 0/018452018 |
| 261 | 0/011970766 | 0/016656157 | 0/024827785 | **1261** | 0/011000255 | 0/015664085 | 0/018452018 |
| 262 | 0/011970766 | 0/016656157 | 0/024827785 | **1262** | 0/011000255 | 0/015664085 | 0/018452018 |
| 263 | 0/011970766 | 0/016656157 | 0/024827785 | **1263** | 0/011000255 | 0/015664085 | 0/018452018 |
| 264 | 0/011970766 | 0/016656157 | 0/024827785 | **1264** | 0/011000255 | 0/01552704 | 0/018452018 |
| 265 | 0/011970766 | 0/016656157 | 0/024827785 | **1265** | 0/011000255 | 0/01552704 | 0/018452018 |
| 266 | 0/011970766 | 0/016656157 | 0/024827785 | **1266** | 0/011000255 | 0/01552704 | 0/018452018 |
| 267 | 0/011970766 | 0/016656157 | 0/024827785 | **1267** | 0/011000255 | 0/01552704 | 0/018452018 |
| 268 | 0/011970766 | 0/016656157 | 0/024827785 | **1268** | 0/011000255 | 0/01552704 | 0/018452018 |
| 269 | 0/011970766 | 0/016656157 | 0/024827785 | **1269** | 0/011000255 | 0/01552704 | 0/018452018 |
| 270 | 0/011970766 | 0/016656157 | 0/024827785 | **1270** | 0/011000255 | 0/01552704 | 0/018452018 |
| 271 | 0/011970766 | 0/016656157 | 0/024827785 | **1271** | 0/011000255 | 0/01552704 | 0/018452018 |
| 272 | 0/011970766 | 0/016656157 | 0/024827785 | **1272** | 0/011000255 | 0/01552704 | 0/018452018 |
| 273 | 0/011970766 | 0/016656157 | 0/024827785 | **1273** | 0/011000255 | 0/01552704 | 0/018452018 |
| 274 | 0/011970766 | 0/016656157 | 0/024827785 | **1274** | 0/011000255 | 0/01552704 | 0/018452018 |
| 275 | 0/011970766 | 0/016656157 | 0/024827785 | **1275** | 0/011000255 | 0/01552704 | 0/018452018 |
| 276 | 0/011970766 | 0/016656157 | 0/024827785 | **1276** | 0/011000255 | 0/015484882 | 0/018452018 |
| 277 | 0/011970766 | 0/016656157 | 0/024827785 | **1277** | 0/011000255 | 0/015484882 | 0/018452018 |
| 278 | 0/011970766 | 0/016656157 | 0/024827785 | **1278** | 0/011000255 | 0/015484882 | 0/018452018 |
| 279 | 0/011970766 | 0/016656157 | 0/024827785 | **1279** | 0/011000255 | 0/015484882 | 0/018452018 |
| 280 | 0/011970766 | 0/016365049 | 0/024827785 | **1280** | 0/011000255 | 0/015484882 | 0/018452018 |
| 281 | 0/011970766 | 0/016365049 | 0/024827785 | **1281** | 0/011000255 | 0/015484882 | 0/018452018 |
| 282 | 0/011970766 | 0/016365049 | 0/024827785 | **1282** | 0/011000255 | 0/015484882 | 0/018452018 |
| 283 | 0/011970766 | 0/016365049 | 0/024827785 | **1283** | 0/011000255 | 0/015484882 | 0/018452018 |
| 284 | 0/011970766 | 0/016365049 | 0/024827785 | **1284** | 0/011000255 | 0/015484882 | 0/018452018 |
| 285 | 0/011970766 | 0/016365049 | 0/024827785 | **1285** | 0/011000255 | 0/015484882 | 0/018452018 |
| 286 | 0/011970766 | 0/016365049 | 0/024827785 | **1286** | 0/011000255 | 0/015484882 | 0/018452018 |
| 287 | 0/011970766 | 0/016365049 | 0/024827785 | **1287** | 0/011000255 | 0/015484882 | 0/018452018 |
| 288 | 0/011970766 | 0/016365049 | 0/024827785 | **1288** | 0/011000255 | 0/015484882 | 0/018452018 |
| 289 | 0/011970766 | 0/016365049 | 0/024827785 | **1289** | 0/011000255 | 0/015484882 | 0/018452018 |
| 290 | 0/011970766 | 0/016365049 | 0/024827785 | **1290** | 0/011000255 | 0/015484882 | 0/018452018 |
| 291 | 0/011970766 | 0/016365049 | 0/024827785 | **1291** | 0/011000255 | 0/015484882 | 0/018452018 |
| 292 | 0/011970766 | 0/016365049 | 0/024827785 | **1292** | 0/011000255 | 0/015484882 | 0/018452018 |
| 293 | 0/011970766 | 0/016365049 | 0/024827785 | **1293** | 0/011000255 | 0/015484882 | 0/018452018 |
| 294 | 0/011970766 | 0/016365049 | 0/024827785 | **1294** | 0/011000255 | 0/015484882 | 0/018452018 |
| 295 | 0/011970766 | 0/016365049 | 0/024827785 | **1295** | 0/011000255 | 0/015484882 | 0/018452018 |
| 296 | 0/011970766 | 0/016365049 | 0/024827785 | **1296** | 0/011000255 | 0/015484882 | 0/018452018 |
| 297 | 0/011970766 | 0/016365049 | 0/024827785 | **1297** | 0/011000255 | 0/015484882 | 0/018452018 |
| 298 | 0/011970766 | 0/016365049 | 0/024827785 | **1298** | 0/011000255 | 0/015484882 | 0/018452018 |
| 299 | 0/011970766 | 0/016365049 | 0/024827785 | **1299** | 0/011000255 | 0/015484882 | 0/018452018 |
| 300 | 0/011970766 | 0/016365049 | 0/024827785 | **1300** | 0/011000255 | 0/015484882 | 0/018452018 |
| 301 | 0/011970766 | 0/016365049 | 0/024827785 | **1301** | 0/011000255 | 0/015484882 | 0/018452018 |
| 302 | 0/011970766 | 0/016365049 | 0/024827785 | **1302** | 0/011000255 | 0/015484882 | 0/018452018 |
| 303 | 0/011970766 | 0/016365049 | 0/024827785 | **1303** | 0/011000255 | 0/015484882 | 0/018452018 |
| 304 | 0/011970766 | 0/016365049 | 0/024827785 | **1304** | 0/011000255 | 0/015484882 | 0/018452018 |
| 305 | 0/011970766 | 0/016365049 | 0/024827785 | **1305** | 0/011000255 | 0/015484882 | 0/018452018 |
| 306 | 0/011970766 | 0/016365049 | 0/024827785 | **1306** | 0/011000255 | 0/015484882 | 0/018452018 |
| 307 | 0/011970766 | 0/016365049 | 0/024827785 | **1307** | 0/011000255 | 0/015484882 | 0/018452018 |
| 308 | 0/011970766 | 0/016365049 | 0/024827785 | **1308** | 0/011000255 | 0/015484882 | 0/018452018 |
| 309 | 0/011970766 | 0/016365049 | 0/024827785 | **1309** | 0/011000255 | 0/015484882 | 0/018452018 |
| 310 | 0/011970766 | 0/016365049 | 0/024827785 | **1310** | 0/011000255 | 0/015484882 | 0/018452018 |
| 311 | 0/011970766 | 0/016365049 | 0/024827785 | **1311** | 0/011000255 | 0/015484882 | 0/018452018 |
| 312 | 0/011970766 | 0/016365049 | 0/024827785 | **1312** | 0/011000255 | 0/015484882 | 0/018452018 |
| 313 | 0/011970766 | 0/016365049 | 0/024827785 | **1313** | 0/011000255 | 0/015484882 | 0/018452018 |
| 314 | 0/011970766 | 0/016365049 | 0/024827785 | **1314** | 0/011000255 | 0/015484882 | 0/018452018 |
| 315 | 0/011970766 | 0/016365049 | 0/024827785 | **1315** | 0/011000255 | 0/015484882 | 0/018452018 |
| 316 | 0/011970766 | 0/016365049 | 0/024827785 | **1316** | 0/011000255 | 0/015484882 | 0/018452018 |
| 317 | 0/011970766 | 0/016365049 | 0/024827785 | **1317** | 0/011000255 | 0/015484882 | 0/018452018 |
| 318 | 0/011970766 | 0/016365049 | 0/024827785 | **1318** | 0/011000255 | 0/015484882 | 0/018452018 |
| 319 | 0/011970766 | 0/016365049 | 0/024827785 | **1319** | 0/011000255 | 0/015484882 | 0/018452018 |
| 320 | 0/011970766 | 0/016365049 | 0/024827785 | **1320** | 0/011000255 | 0/015484882 | 0/018452018 |
| 321 | 0/011970766 | 0/016365049 | 0/024827785 | **1321** | 0/011000255 | 0/015484882 | 0/018452018 |
| 322 | 0/011970766 | 0/016365049 | 0/024827785 | **1322** | 0/011000255 | 0/015484882 | 0/018452018 |
| 323 | 0/011970766 | 0/016365049 | 0/024827785 | **1323** | 0/011000255 | 0/015484882 | 0/018452018 |
| 324 | 0/011970766 | 0/016365049 | 0/024827785 | **1324** | 0/011000255 | 0/015484882 | 0/018452018 |
| 325 | 0/011970766 | 0/016365049 | 0/024827785 | **1325** | 0/011000255 | 0/015484882 | 0/018452018 |
| 326 | 0/011970766 | 0/016365049 | 0/024827785 | **1326** | 0/011000255 | 0/015484882 | 0/018452018 |
| 327 | 0/011970766 | 0/016365049 | 0/024827785 | **1327** | 0/011000255 | 0/015484882 | 0/018452018 |
| 328 | 0/011970766 | 0/016365049 | 0/024827785 | **1328** | 0/011000255 | 0/015484882 | 0/018452018 |
| 329 | 0/011970766 | 0/016365049 | 0/024827785 | **1329** | 0/011000255 | 0/015484882 | 0/018452018 |
| 330 | 0/011970766 | 0/016365049 | 0/024827785 | **1330** | 0/011000255 | 0/015484882 | 0/018452018 |
| 331 | 0/011970766 | 0/016365049 | 0/024827785 | **1331** | 0/011000255 | 0/015484882 | 0/018452018 |
| 332 | 0/011970766 | 0/016365049 | 0/024827785 | **1332** | 0/011000255 | 0/015484882 | 0/018452018 |
| 333 | 0/011970766 | 0/016365049 | 0/024827785 | **1333** | 0/011000255 | 0/015484882 | 0/018452018 |
| 334 | 0/011970766 | 0/016365049 | 0/024827785 | **1334** | 0/011000255 | 0/015484882 | 0/018452018 |
| 335 | 0/011970766 | 0/016365049 | 0/024827785 | **1335** | 0/011000255 | 0/015484882 | 0/018452018 |
| 336 | 0/011970766 | 0/016365049 | 0/024827785 | **1336** | 0/011000255 | 0/015484882 | 0/018452018 |
| 337 | 0/011970766 | 0/016365049 | 0/024827785 | **1337** | 0/011000255 | 0/015484882 | 0/018452018 |
| 338 | 0/011970766 | 0/016365049 | 0/023901583 | **1338** | 0/011000255 | 0/015484882 | 0/018452018 |
| 339 | 0/011970766 | 0/016365049 | 0/023901583 | **1339** | 0/011000255 | 0/015484882 | 0/018452018 |
| 340 | 0/011970766 | 0/016365049 | 0/023901583 | **1340** | 0/011000255 | 0/015484882 | 0/018452018 |
| 341 | 0/011970766 | 0/016365049 | 0/023901583 | **1341** | 0/011000255 | 0/015484882 | 0/018452018 |
| 342 | 0/011970766 | 0/016365049 | 0/023901583 | **1342** | 0/011000255 | 0/015484882 | 0/018452018 |
| 343 | 0/011970766 | 0/016365049 | 0/023901583 | **1343** | 0/011000255 | 0/015484882 | 0/018452018 |
| 344 | 0/011970766 | 0/016365049 | 0/023901583 | **1344** | 0/011000255 | 0/015484882 | 0/018452018 |
| 345 | 0/011970766 | 0/016365049 | 0/023901583 | **1345** | 0/011000255 | 0/015484882 | 0/018452018 |
| 346 | 0/011970766 | 0/016365049 | 0/023901583 | **1346** | 0/011000255 | 0/015484882 | 0/018452018 |
| 347 | 0/011970766 | 0/016365049 | 0/023901583 | **1347** | 0/011000255 | 0/015484882 | 0/018452018 |
| 348 | 0/011970766 | 0/016365049 | 0/023901583 | **1348** | 0/011000255 | 0/015484882 | 0/018452018 |
| 349 | 0/011970766 | 0/016365049 | 0/023901583 | **1349** | 0/011000255 | 0/015484882 | 0/018452018 |
| 350 | 0/011970766 | 0/016365049 | 0/023901583 | **1350** | 0/011000255 | 0/015484882 | 0/018452018 |
| 351 | 0/011970766 | 0/016365049 | 0/023901583 | **1351** | 0/011000255 | 0/015484882 | 0/018452018 |
| 352 | 0/011970766 | 0/016365049 | 0/023901583 | **1352** | 0/011000255 | 0/015484882 | 0/018452018 |
| 353 | 0/011970766 | 0/016365049 | 0/023901583 | **1353** | 0/011000255 | 0/015484882 | 0/018452018 |
| 354 | 0/011970766 | 0/016365049 | 0/023901583 | **1354** | 0/011000255 | 0/015484882 | 0/018452018 |
| 355 | 0/011970766 | 0/016365049 | 0/023901583 | **1355** | 0/011000255 | 0/015484882 | 0/018452018 |
| 356 | 0/011970766 | 0/016365049 | 0/023901583 | **1356** | 0/011000255 | 0/015484882 | 0/018452018 |
| 357 | 0/011970766 | 0/016365049 | 0/023901583 | **1357** | 0/011000255 | 0/015484882 | 0/018452018 |
| 358 | 0/011970766 | 0/016365049 | 0/023901583 | **1358** | 0/011000255 | 0/015484882 | 0/018452018 |
| 359 | 0/011970766 | 0/016365049 | 0/023901583 | **1359** | 0/011000255 | 0/015484882 | 0/018452018 |
| 360 | 0/011970766 | 0/016365049 | 0/023901583 | **1360** | 0/011000255 | 0/015484882 | 0/018452018 |
| 361 | 0/011970766 | 0/016365049 | 0/023901583 | **1361** | 0/011000255 | 0/015484882 | 0/018452018 |
| 362 | 0/011970766 | 0/016365049 | 0/023901583 | **1362** | 0/011000255 | 0/015484882 | 0/018452018 |
| 363 | 0/011970766 | 0/016365049 | 0/023901583 | **1363** | 0/011000255 | 0/015484882 | 0/018452018 |
| 364 | 0/011970766 | 0/016365049 | 0/023901583 | **1364** | 0/011000255 | 0/015484882 | 0/018452018 |
| 365 | 0/011970766 | 0/016365049 | 0/023901583 | **1365** | 0/011000255 | 0/015484882 | 0/018452018 |
| 366 | 0/011970766 | 0/016365049 | 0/023901583 | **1366** | 0/011000255 | 0/015484882 | 0/018452018 |
| 367 | 0/011970766 | 0/016365049 | 0/023901583 | **1367** | 0/011000255 | 0/015484882 | 0/018452018 |
| 368 | 0/011970766 | 0/016365049 | 0/023901583 | **1368** | 0/011000255 | 0/015484882 | 0/018452018 |
| 369 | 0/011970766 | 0/016365049 | 0/023901583 | **1369** | 0/011000255 | 0/015484882 | 0/018452018 |
| 370 | 0/011970766 | 0/016365049 | 0/023901583 | **1370** | 0/011000255 | 0/015484882 | 0/018452018 |
| 371 | 0/011970766 | 0/016365049 | 0/023901583 | **1371** | 0/011000255 | 0/015484882 | 0/018452018 |
| 372 | 0/011970766 | 0/016365049 | 0/023901583 | **1372** | 0/011000255 | 0/015484882 | 0/018452018 |
| 373 | 0/011970766 | 0/016365049 | 0/023901583 | **1373** | 0/011000255 | 0/015484882 | 0/018452018 |
| 374 | 0/011970766 | 0/016365049 | 0/023901583 | **1374** | 0/011000255 | 0/015484882 | 0/018452018 |
| 375 | 0/011970766 | 0/016365049 | 0/023901583 | **1375** | 0/011000255 | 0/015484882 | 0/018452018 |
| 376 | 0/011970766 | 0/016365049 | 0/023901583 | **1376** | 0/011000255 | 0/015484882 | 0/018452018 |
| 377 | 0/011970766 | 0/016365049 | 0/023901583 | **1377** | 0/011000255 | 0/015484882 | 0/018452018 |
| 378 | 0/011970766 | 0/016365049 | 0/023901583 | **1378** | 0/011000255 | 0/015484882 | 0/018452018 |
| 379 | 0/011970766 | 0/016365049 | 0/023901583 | **1379** | 0/011000255 | 0/015484882 | 0/018452018 |
| 380 | 0/011970766 | 0/016365049 | 0/023901583 | **1380** | 0/011000255 | 0/015484882 | 0/018452018 |
| 381 | 0/011970766 | 0/016365049 | 0/023901583 | **1381** | 0/011000255 | 0/015484882 | 0/018452018 |
| 382 | 0/011970766 | 0/016365049 | 0/023901583 | **1382** | 0/011000255 | 0/015484882 | 0/018452018 |
| 383 | 0/011970766 | 0/016365049 | 0/023901583 | **1383** | 0/011000255 | 0/015484882 | 0/018452018 |
| 384 | 0/011970766 | 0/016365049 | 0/023901583 | **1384** | 0/011000255 | 0/015484882 | 0/018452018 |
| 385 | 0/011970766 | 0/016365049 | 0/023901583 | **1385** | 0/011000255 | 0/015484882 | 0/018452018 |
| 386 | 0/011970766 | 0/016365049 | 0/023901583 | **1386** | 0/011000255 | 0/015484882 | 0/018452018 |
| 387 | 0/011970766 | 0/016365049 | 0/023901583 | **1387** | 0/011000255 | 0/015484882 | 0/018452018 |
| 388 | 0/011970766 | 0/016365049 | 0/023901583 | **1388** | 0/011000255 | 0/015484882 | 0/018452018 |
| 389 | 0/011970766 | 0/016365049 | 0/023901583 | **1389** | 0/011000255 | 0/015484882 | 0/018452018 |
| 390 | 0/011970766 | 0/016365049 | 0/023901583 | **1390** | 0/011000255 | 0/015484882 | 0/018452018 |
| 391 | 0/011970766 | 0/016365049 | 0/023901583 | **1391** | 0/011000255 | 0/015484882 | 0/018452018 |
| 392 | 0/011970766 | 0/016365049 | 0/023901583 | **1392** | 0/011000255 | 0/015484882 | 0/018452018 |
| 393 | 0/011970766 | 0/016365049 | 0/023901583 | **1393** | 0/011000255 | 0/015484882 | 0/018452018 |
| 394 | 0/011970766 | 0/016365049 | 0/023901583 | **1394** | 0/011000255 | 0/015484882 | 0/018452018 |
| 395 | 0/011970766 | 0/016365049 | 0/023901583 | **1395** | 0/011000255 | 0/015484882 | 0/018452018 |
| 396 | 0/011970766 | 0/016365049 | 0/023901583 | **1396** | 0/011000255 | 0/015484882 | 0/018452018 |
| 397 | 0/011970766 | 0/016365049 | 0/023901583 | **1397** | 0/011000255 | 0/015484882 | 0/018452018 |
| 398 | 0/011970766 | 0/016365049 | 0/023901583 | **1398** | 0/011000255 | 0/015484882 | 0/018452018 |
| 399 | 0/011970766 | 0/016365049 | 0/023901583 | **1399** | 0/011000255 | 0/015484882 | 0/018452018 |
| 400 | 0/011970766 | 0/016365049 | 0/023901583 | **1400** | 0/011000255 | 0/015484882 | 0/018452018 |
| 401 | 0/011970766 | 0/016365049 | 0/023901583 | **1401** | 0/011000255 | 0/015484882 | 0/018452018 |
| 402 | 0/011970766 | 0/016365049 | 0/023901583 | **1402** | 0/011000255 | 0/015484882 | 0/018452018 |
| 403 | 0/011970766 | 0/016365049 | 0/023901583 | **1403** | 0/010998975 | 0/015484882 | 0/018452018 |
| 404 | 0/011970766 | 0/016365049 | 0/023901583 | **1404** | 0/010998975 | 0/015484882 | 0/018452018 |
| 405 | 0/011970766 | 0/016365049 | 0/023901583 | **1405** | 0/010998975 | 0/015484882 | 0/018452018 |
| 406 | 0/011970766 | 0/016365049 | 0/023901583 | **1406** | 0/010998975 | 0/015484882 | 0/018452018 |
| 407 | 0/011970766 | 0/016365049 | 0/023901583 | **1407** | 0/010998975 | 0/015484882 | 0/018452018 |
| 408 | 0/011970766 | 0/016365049 | 0/023901583 | **1408** | 0/010998975 | 0/015484882 | 0/018452018 |
| 409 | 0/011970766 | 0/016365049 | 0/023901583 | **1409** | 0/010998975 | 0/015484882 | 0/018452018 |
| 410 | 0/011970766 | 0/016365049 | 0/023901583 | **1410** | 0/010998975 | 0/015484882 | 0/018452018 |
| 411 | 0/011970766 | 0/016365049 | 0/023901583 | **1411** | 0/010998975 | 0/015484882 | 0/018452018 |
| 412 | 0/011970766 | 0/016365049 | 0/023901583 | **1412** | 0/010998975 | 0/015484882 | 0/018452018 |
| 413 | 0/011970766 | 0/016365049 | 0/023901583 | **1413** | 0/010998975 | 0/015484882 | 0/018452018 |
| 414 | 0/011970766 | 0/016365049 | 0/023901583 | **1414** | 0/010998975 | 0/015484882 | 0/018452018 |
| 415 | 0/011970766 | 0/016365049 | 0/023901583 | **1415** | 0/010998975 | 0/015484882 | 0/018452018 |
| 416 | 0/011970766 | 0/016365049 | 0/023901583 | **1416** | 0/010998975 | 0/015484882 | 0/018452018 |
| 417 | 0/011970766 | 0/016365049 | 0/023901583 | **1417** | 0/010998975 | 0/015484882 | 0/018452018 |
| 418 | 0/011970766 | 0/016365049 | 0/023901583 | **1418** | 0/010998975 | 0/015484882 | 0/018452018 |
| 419 | 0/011970766 | 0/016365049 | 0/023901583 | **1419** | 0/010998975 | 0/015484882 | 0/018452018 |
| 420 | 0/011970766 | 0/016365049 | 0/023901583 | **1420** | 0/010998975 | 0/015484882 | 0/018452018 |
| 421 | 0/011970766 | 0/016365049 | 0/023901583 | **1421** | 0/010998975 | 0/015484882 | 0/018452018 |
| 422 | 0/011970766 | 0/016365049 | 0/023901583 | **1422** | 0/010998975 | 0/015484882 | 0/018452018 |
| 423 | 0/011970766 | 0/016365049 | 0/023901583 | **1423** | 0/010998975 | 0/015484882 | 0/018452018 |
| 424 | 0/011970766 | 0/016365049 | 0/023901583 | **1424** | 0/010998975 | 0/015484882 | 0/018452018 |
| 425 | 0/011970766 | 0/016365049 | 0/023901583 | **1425** | 0/010998975 | 0/015484882 | 0/018452018 |
| 426 | 0/011970766 | 0/016365049 | 0/023901583 | **1426** | 0/010998975 | 0/015484882 | 0/018452018 |
| 427 | 0/011970766 | 0/016365049 | 0/023901583 | **1427** | 0/010998975 | 0/015484882 | 0/018452018 |
| 428 | 0/011970766 | 0/016365049 | 0/023901583 | **1428** | 0/010998975 | 0/015484882 | 0/018452018 |
| 429 | 0/011970766 | 0/016365049 | 0/023901583 | **1429** | 0/010998975 | 0/015484882 | 0/018452018 |
| 430 | 0/011970766 | 0/016365049 | 0/023901583 | **1430** | 0/010998975 | 0/015484882 | 0/018452018 |
| 431 | 0/011970766 | 0/016365049 | 0/023901583 | **1431** | 0/010998975 | 0/015484882 | 0/018452018 |
| 432 | 0/011970766 | 0/016365049 | 0/023901583 | **1432** | 0/010998975 | 0/015484882 | 0/018444669 |
| 433 | 0/011970766 | 0/016365049 | 0/023901583 | **1433** | 0/010998975 | 0/015484882 | 0/018444669 |
| 434 | 0/011970766 | 0/016365049 | 0/023901583 | **1434** | 0/010998975 | 0/015484882 | 0/018444669 |
| 435 | 0/011970766 | 0/016365049 | 0/023901583 | **1435** | 0/010998975 | 0/015484882 | 0/018444669 |
| 436 | 0/011970766 | 0/016365049 | 0/023901583 | **1436** | 0/010998975 | 0/015484882 | 0/018444669 |
| 437 | 0/011970766 | 0/016365049 | 0/023901583 | **1437** | 0/010998975 | 0/015484882 | 0/018444669 |
| 438 | 0/011970766 | 0/016365049 | 0/023901583 | **1438** | 0/010998975 | 0/015484882 | 0/018444669 |
| 439 | 0/011970766 | 0/016365049 | 0/023901583 | **1439** | 0/010998975 | 0/015484882 | 0/018444669 |
| 440 | 0/011970766 | 0/016365049 | 0/023901583 | **1440** | 0/010998975 | 0/015484882 | 0/018444669 |
| 441 | 0/011970766 | 0/016365049 | 0/023901583 | **1441** | 0/010998975 | 0/015484882 | 0/018444669 |
| 442 | 0/011970766 | 0/016365049 | 0/023901583 | **1442** | 0/010998975 | 0/015484882 | 0/018444669 |
| 443 | 0/011970766 | 0/016365049 | 0/023901583 | **1443** | 0/010998975 | 0/015484882 | 0/018444669 |
| 444 | 0/011970766 | 0/016365049 | 0/023901583 | **1444** | 0/010998975 | 0/015484882 | 0/018444669 |
| 445 | 0/011970766 | 0/016365049 | 0/023901583 | **1445** | 0/010998975 | 0/015484882 | 0/018444669 |
| 446 | 0/011970766 | 0/016365049 | 0/023798532 | **1446** | 0/010998975 | 0/015484882 | 0/018444669 |
| 447 | 0/011970766 | 0/016365049 | 0/023798532 | **1447** | 0/010998975 | 0/015484882 | 0/018444669 |
| 448 | 0/011970766 | 0/016365049 | 0/023798532 | **1448** | 0/010998975 | 0/015484882 | 0/018444669 |
| 449 | 0/011970766 | 0/016365049 | 0/023798532 | **1449** | 0/010998975 | 0/015484882 | 0/018444669 |
| 450 | 0/011739671 | 0/016365049 | 0/023798532 | **1450** | 0/010998975 | 0/015484882 | 0/018444669 |
| 451 | 0/011739671 | 0/016365049 | 0/023798532 | **1451** | 0/010998975 | 0/015484882 | 0/018444669 |
| 452 | 0/011739671 | 0/016365049 | 0/023798532 | **1452** | 0/010998975 | 0/015484882 | 0/018444669 |
| 453 | 0/011739671 | 0/016365049 | 0/023798532 | **1453** | 0/010998975 | 0/015484882 | 0/018444669 |
| 454 | 0/011739671 | 0/016365049 | 0/023798532 | **1454** | 0/010998975 | 0/015484882 | 0/018444669 |
| 455 | 0/011739671 | 0/016365049 | 0/023798532 | **1455** | 0/010998975 | 0/015484882 | 0/018444669 |
| 456 | 0/011739671 | 0/016365049 | 0/023798532 | **1456** | 0/010998975 | 0/015484882 | 0/018444669 |
| 457 | 0/011739671 | 0/016365049 | 0/023798532 | **1457** | 0/010998975 | 0/015484882 | 0/018444669 |
| 458 | 0/011739671 | 0/016365049 | 0/023798532 | **1458** | 0/010998975 | 0/015484882 | 0/018444669 |
| 459 | 0/011739671 | 0/016365049 | 0/023798532 | **1459** | 0/010998975 | 0/015484882 | 0/018444669 |
| 460 | 0/011739671 | 0/016365049 | 0/023798532 | **1460** | 0/010998975 | 0/015484882 | 0/018104028 |
| 461 | 0/011739671 | 0/016365049 | 0/023798532 | **1461** | 0/010998975 | 0/015484882 | 0/018104028 |
| 462 | 0/011739671 | 0/016365049 | 0/023798532 | **1462** | 0/010998975 | 0/015484882 | 0/018104028 |
| 463 | 0/011739671 | 0/016365049 | 0/023798532 | **1463** | 0/010998975 | 0/015484882 | 0/018104028 |
| 464 | 0/011739671 | 0/016365049 | 0/023798532 | **1464** | 0/010998975 | 0/015484882 | 0/018104028 |
| 465 | 0/011739671 | 0/016365049 | 0/023798532 | **1465** | 0/010998975 | 0/015484882 | 0/018104028 |
| 466 | 0/011739671 | 0/016365049 | 0/023798532 | **1466** | 0/010998975 | 0/015448173 | 0/018104028 |
| 467 | 0/011739671 | 0/016365049 | 0/023798532 | **1467** | 0/010998975 | 0/015448173 | 0/018104028 |
| 468 | 0/011739671 | 0/016365049 | 0/023798532 | **1468** | 0/010998975 | 0/015448173 | 0/018104028 |
| 469 | 0/011739671 | 0/016365049 | 0/023584886 | **1469** | 0/010998975 | 0/015448173 | 0/018104028 |
| 470 | 0/011739671 | 0/016365049 | 0/023584886 | **1470** | 0/010998975 | 0/015448173 | 0/018104028 |
| 471 | 0/011739671 | 0/016365049 | 0/023584886 | **1471** | 0/010998975 | 0/015448173 | 0/018104028 |
| 472 | 0/011739671 | 0/016365049 | 0/023584886 | **1472** | 0/010998975 | 0/015448173 | 0/018104028 |
| 473 | 0/011739671 | 0/016365049 | 0/023584886 | **1473** | 0/010998975 | 0/015448173 | 0/018104028 |
| 474 | 0/011739671 | 0/016365049 | 0/023584886 | **1474** | 0/010998975 | 0/015448173 | 0/018104028 |
| 475 | 0/011739671 | 0/016365049 | 0/023584886 | **1475** | 0/010998975 | 0/015448173 | 0/018104028 |
| 476 | 0/011739671 | 0/016365049 | 0/023584886 | **1476** | 0/010998975 | 0/015448173 | 0/018104028 |
| 477 | 0/011739671 | 0/016365049 | 0/023584886 | **1477** | 0/010998975 | 0/015448173 | 0/018104028 |
| 478 | 0/011739671 | 0/016365049 | 0/022239759 | **1478** | 0/010998975 | 0/015448173 | 0/018104028 |
| 479 | 0/011739671 | 0/016365049 | 0/022239759 | **1479** | 0/010998975 | 0/015448173 | 0/018104028 |
| 480 | 0/011739671 | 0/016365049 | 0/022239759 | **1480** | 0/010998975 | 0/015448173 | 0/018104028 |
| 481 | 0/011739671 | 0/016365049 | 0/022239759 | **1481** | 0/010998975 | 0/015448173 | 0/018104028 |
| 482 | 0/011718539 | 0/016365049 | 0/022239759 | **1482** | 0/010998975 | 0/015448173 | 0/018104028 |
| 483 | 0/011718539 | 0/016365049 | 0/022239759 | **1483** | 0/010998975 | 0/015448173 | 0/018104028 |
| 484 | 0/011718539 | 0/016365049 | 0/022239759 | **1484** | 0/010998975 | 0/015448173 | 0/018104028 |
| 485 | 0/011718539 | 0/016365049 | 0/022239759 | **1485** | 0/010998975 | 0/015448173 | 0/018104028 |
| 486 | 0/011718539 | 0/016365049 | 0/022239759 | **1486** | 0/010998975 | 0/015448173 | 0/018104028 |
| 487 | 0/011718539 | 0/016365049 | 0/022239759 | **1487** | 0/010998975 | 0/015448173 | 0/018104028 |
| 488 | 0/011718539 | 0/016365049 | 0/022239759 | **1488** | 0/010998975 | 0/015448173 | 0/018104028 |
| 489 | 0/011718539 | 0/016365049 | 0/022239759 | **1489** | 0/010998975 | 0/015448173 | 0/018104028 |
| 490 | 0/011718539 | 0/016365049 | 0/022239759 | **1490** | 0/010998975 | 0/015448173 | 0/018104028 |
| 491 | 0/011718539 | 0/016365049 | 0/022239759 | **1491** | 0/010998975 | 0/015448173 | 0/018104028 |
| 492 | 0/011718539 | 0/016365049 | 0/022239759 | **1492** | 0/010998975 | 0/015448173 | 0/018104028 |
| 493 | 0/011718539 | 0/016365049 | 0/022239759 | **1493** | 0/010998975 | 0/015448173 | 0/018104028 |
| 494 | 0/011718539 | 0/016365049 | 0/022239759 | **1494** | 0/010998975 | 0/015448173 | 0/018104028 |
| 495 | 0/011718539 | 0/016365049 | 0/022239759 | **1495** | 0/010998975 | 0/015448173 | 0/018104028 |
| 496 | 0/011718539 | 0/016365049 | 0/022239759 | **1496** | 0/010998975 | 0/015448173 | 0/018104028 |
| 497 | 0/011718539 | 0/016365049 | 0/022239759 | **1497** | 0/010998975 | 0/015448173 | 0/018104028 |
| 498 | 0/011718539 | 0/016365049 | 0/022239759 | **1498** | 0/010998975 | 0/015448173 | 0/018104028 |
| 499 | 0/011718539 | 0/016365049 | 0/022239759 | **1499** | 0/010998975 | 0/015448173 | 0/018104028 |
| 500 | 0/011718539 | 0/016365049 | 0/022239759 | **1500** | 0/010998975 | 0/015448173 | 0/018104028 |
| 501 | 0/011718539 | 0/016365049 | 0/022239759 | **1501** | 0/010998975 | 0/015448173 | 0/018104028 |
| 502 | 0/011718539 | 0/016365049 | 0/022239759 | **1502** | 0/010998975 | 0/015448173 | 0/018104028 |
| 503 | 0/011718539 | 0/016365049 | 0/022239759 | **1503** | 0/010998975 | 0/015448173 | 0/018104028 |
| 504 | 0/011718539 | 0/016365049 | 0/022239759 | **1504** | 0/010998975 | 0/015448173 | 0/018104028 |
| 505 | 0/011718539 | 0/016365049 | 0/022239759 | **1505** | 0/010998975 | 0/015448173 | 0/018104028 |
| 506 | 0/011718539 | 0/016365049 | 0/022239759 | **1506** | 0/010998975 | 0/015448173 | 0/018104028 |
| 507 | 0/011541939 | 0/016365049 | 0/022239759 | **1507** | 0/010998975 | 0/015448173 | 0/018104028 |
| 508 | 0/011541939 | 0/016365049 | 0/022239759 | **1508** | 0/010998975 | 0/015448173 | 0/018104028 |
| 509 | 0/011541939 | 0/016365049 | 0/022239759 | **1509** | 0/010998975 | 0/015448173 | 0/018104028 |
| 510 | 0/011541939 | 0/016365049 | 0/022239759 | **1510** | 0/010998975 | 0/015448173 | 0/018104028 |
| 511 | 0/011541939 | 0/016365049 | 0/022239759 | **1511** | 0/010998975 | 0/015448173 | 0/018104028 |
| 512 | 0/011541939 | 0/016091987 | 0/022239759 | **1512** | 0/010998975 | 0/015448173 | 0/018104028 |
| 513 | 0/011541939 | 0/016091987 | 0/022239759 | **1513** | 0/010998975 | 0/015448173 | 0/018104028 |
| 514 | 0/011541939 | 0/016091987 | 0/022239759 | **1514** | 0/010998975 | 0/015448173 | 0/018104028 |
| 515 | 0/011541939 | 0/016091987 | 0/022239759 | **1515** | 0/010998975 | 0/015448173 | 0/018104028 |
| 516 | 0/011541939 | 0/016091987 | 0/022239759 | **1516** | 0/010998975 | 0/015448173 | 0/018104028 |
| 517 | 0/011541939 | 0/016091987 | 0/022239759 | **1517** | 0/010998975 | 0/015448173 | 0/018104028 |
| 518 | 0/011541939 | 0/016091987 | 0/022239759 | **1518** | 0/010998975 | 0/015448173 | 0/018104028 |
| 519 | 0/011541939 | 0/016091987 | 0/022239759 | **1519** | 0/010998975 | 0/015448173 | 0/018104028 |
| 520 | 0/011541939 | 0/016091987 | 0/022239759 | **1520** | 0/010998975 | 0/015448173 | 0/018104028 |
| 521 | 0/011541939 | 0/016091987 | 0/022239759 | **1521** | 0/010998975 | 0/015448173 | 0/018104028 |
| 522 | 0/011541939 | 0/016091987 | 0/022239759 | **1522** | 0/010998975 | 0/015448173 | 0/018104028 |
| 523 | 0/011541939 | 0/016091987 | 0/022239759 | **1523** | 0/010998975 | 0/015448173 | 0/018104028 |
| 524 | 0/011541939 | 0/016091987 | 0/022239759 | **1524** | 0/002629 | 0/016348 | 0/021904 |
| 525 | 0/011541939 | 0/016091987 | 0/022239759 | **1525** | 0/002629 | 0/016348 | 0/021904 |
| 526 | 0/011541939 | 0/016091987 | 0/022239759 | **1526** | 0/002629 | 0/016348 | 0/021904 |
| 527 | 0/011541939 | 0/016091987 | 0/022239759 | **1527** | 0/002629 | 0/016348 | 0/021904 |
| 528 | 0/011541939 | 0/016091987 | 0/022239759 | **1528** | 0/002604 | 0/016348 | 0/021904 |
| 529 | 0/011541939 | 0/016091987 | 0/022239759 | **1529** | 0/002604 | 0/016348 | 0/021904 |
| 530 | 0/011541939 | 0/016091987 | 0/022239759 | **1530** | 0/002604 | 0/016348 | 0/021904 |
| 531 | 0/011541939 | 0/016091987 | 0/022239759 | **1531** | 0/002604 | 0/016348 | 0/021904 |
| 532 | 0/011541939 | 0/016091987 | 0/022239759 | **1532** | 0/002604 | 0/016348 | 0/021904 |
| 533 | 0/011541939 | 0/016091987 | 0/022239759 | **1533** | 0/002604 | 0/016348 | 0/021904 |
| 534 | 0/011541939 | 0/016091987 | 0/022239759 | **1534** | 0/002604 | 0/016348 | 0/021904 |
| 535 | 0/011541939 | 0/016091987 | 0/022239759 | **1535** | 0/002604 | 0/016348 | 0/021904 |
| 536 | 0/011541939 | 0/016091987 | 0/022239759 | **1536** | 0/002604 | 0/016348 | 0/021904 |
| 537 | 0/011541939 | 0/016091987 | 0/022239759 | **1537** | 0/002604 | 0/016348 | 0/021904 |
| 538 | 0/011541939 | 0/016091987 | 0/022239759 | **1538** | 0/002604 | 0/016348 | 0/021904 |
| 539 | 0/011541939 | 0/016091987 | 0/022239759 | **1539** | 0/002604 | 0/016348 | 0/021904 |
| 540 | 0/011541939 | 0/016091987 | 0/022239759 | **1540** | 0/002604 | 0/016348 | 0/021904 |
| 541 | 0/011541939 | 0/016091987 | 0/022239759 | **1541** | 0/002604 | 0/016348 | 0/021904 |
| 542 | 0/011541939 | 0/016091987 | 0/022239759 | **1542** | 0/002604 | 0/016348 | 0/021904 |
| 543 | 0/011541939 | 0/016091987 | 0/022239759 | **1543** | 0/002604 | 0/016348 | 0/021904 |
| 544 | 0/011541939 | 0/016091987 | 0/022239759 | **1544** | 0/002604 | 0/016348 | 0/021904 |
| 545 | 0/011541939 | 0/016091987 | 0/022239759 | **1545** | 0/002604 | 0/016348 | 0/021904 |
| 546 | 0/011541939 | 0/016091987 | 0/022239759 | **1546** | 0/002604 | 0/016348 | 0/021904 |
| 547 | 0/011541939 | 0/016091987 | 0/022239759 | **1547** | 0/002604 | 0/016348 | 0/021904 |
| 548 | 0/011541939 | 0/016091987 | 0/022239759 | **1548** | 0/002604 | 0/016348 | 0/021904 |
| 549 | 0/011541939 | 0/016091987 | 0/022239759 | **1549** | 0/002604 | 0/016348 | 0/021904 |
| 550 | 0/011541939 | 0/016091987 | 0/022239759 | **1550** | 0/002604 | 0/016348 | 0/021904 |
| 551 | 0/011541939 | 0/016091987 | 0/022239759 | **1551** | 0/002604 | 0/016348 | 0/021904 |
| 552 | 0/011541939 | 0/016091987 | 0/022239759 | **1552** | 0/002604 | 0/016348 | 0/021904 |
| 553 | 0/011541939 | 0/016091987 | 0/022239759 | **1553** | 0/002604 | 0/016348 | 0/021904 |
| 554 | 0/011541939 | 0/016091987 | 0/022239759 | **1554** | 0/002604 | 0/016348 | 0/021904 |
| 555 | 0/011541939 | 0/016091987 | 0/022239759 | **1555** | 0/002604 | 0/016348 | 0/021904 |
| 556 | 0/011541939 | 0/016091987 | 0/022239759 | **1556** | 0/002604 | 0/016348 | 0/021904 |
| 557 | 0/011541939 | 0/016091987 | 0/021830946 | **1557** | 0/002604 | 0/016348 | 0/021904 |
| 558 | 0/011541939 | 0/016091987 | 0/021830946 | **1558** | 0/002604 | 0/016348 | 0/021904 |
| 559 | 0/011541939 | 0/016091987 | 0/021830946 | **1559** | 0/002604 | 0/016348 | 0/021904 |
| 560 | 0/011541939 | 0/016091987 | 0/021830946 | **1560** | 0/002604 | 0/016348 | 0/021904 |
| 561 | 0/011541939 | 0/016091987 | 0/021830946 | **1561** | 0/002604 | 0/016348 | 0/021904 |
| 562 | 0/011541939 | 0/016091987 | 0/021830946 | **1562** | 0/002604 | 0/016348 | 0/021904 |
| 563 | 0/011541939 | 0/016091987 | 0/021830946 | **1563** | 0/002604 | 0/016348 | 0/021904 |
| 564 | 0/011541939 | 0/016091987 | 0/021830946 | **1564** | 0/002604 | 0/016348 | 0/021904 |
| 565 | 0/011541939 | 0/016091987 | 0/021830946 | **1565** | 0/002604 | 0/016348 | 0/021904 |
| 566 | 0/011541939 | 0/016091987 | 0/021830946 | **1566** | 0/002604 | 0/016348 | 0/021904 |
| 567 | 0/011541939 | 0/016091987 | 0/021830946 | **1567** | 0/002604 | 0/016348 | 0/021904 |
| 568 | 0/011541939 | 0/016091987 | 0/021830946 | **1568** | 0/002604 | 0/016348 | 0/021904 |
| 569 | 0/011541939 | 0/016091987 | 0/021830946 | **1569** | 0/002604 | 0/016348 | 0/021904 |
| 570 | 0/011541939 | 0/016091987 | 0/021830946 | **1570** | 0/002604 | 0/016348 | 0/021904 |
| 571 | 0/011541939 | 0/016091987 | 0/021830946 | **1571** | 0/002604 | 0/016348 | 0/021904 |
| 572 | 0/011541939 | 0/016091987 | 0/021830946 | **1572** | 0/002604 | 0/016348 | 0/021904 |
| 573 | 0/011541939 | 0/016091987 | 0/021830946 | **1573** | 0/002604 | 0/016348 | 0/021904 |
| 574 | 0/011541939 | 0/016091987 | 0/021830946 | **1574** | 0/002604 | 0/016348 | 0/021904 |
| 575 | 0/011541939 | 0/016091987 | 0/021830946 | **1575** | 0/002604 | 0/016348 | 0/021904 |
| 576 | 0/011541939 | 0/016091987 | 0/021830946 | **1576** | 0/002604 | 0/016348 | 0/021904 |
| 577 | 0/011541939 | 0/016091987 | 0/021830946 | **1577** | 0/002604 | 0/016348 | 0/021904 |
| 578 | 0/011541939 | 0/016091987 | 0/021830946 | **1578** | 0/002604 | 0/016348 | 0/021904 |
| 579 | 0/011541939 | 0/016091987 | 0/021830946 | **1579** | 0/002604 | 0/016348 | 0/021904 |
| 580 | 0/011541939 | 0/016091987 | 0/021830946 | **1580** | 0/002604 | 0/016348 | 0/021904 |
| 581 | 0/011541939 | 0/016091987 | 0/021830946 | **1581** | 0/002604 | 0/016348 | 0/021904 |
| 582 | 0/011541939 | 0/016091987 | 0/021830946 | **1582** | 0/002604 | 0/016348 | 0/021904 |
| 583 | 0/011541939 | 0/016091987 | 0/021830946 | **1583** | 0/002604 | 0/016348 | 0/021904 |
| 584 | 0/011541939 | 0/016091987 | 0/021830946 | **1584** | 0/002604 | 0/016348 | 0/021904 |
| 585 | 0/011541939 | 0/016091987 | 0/021830946 | **1585** | 0/002604 | 0/016348 | 0/021904 |
| 586 | 0/011541939 | 0/016091987 | 0/021830946 | **1586** | 0/002604 | 0/016348 | 0/021904 |
| 587 | 0/011541939 | 0/016091987 | 0/021830946 | **1587** | 0/002604 | 0/016348 | 0/021904 |
| 588 | 0/011541939 | 0/016091987 | 0/021830946 | **1588** | 0/002604 | 0/016348 | 0/021904 |
| 589 | 0/011541939 | 0/016091987 | 0/021830946 | **1589** | 0/002604 | 0/016348 | 0/021904 |
| 590 | 0/011541939 | 0/016091987 | 0/021830946 | **1590** | 0/002604 | 0/016348 | 0/021904 |
| 591 | 0/011541939 | 0/016091987 | 0/021830946 | **1591** | 0/002604 | 0/016348 | 0/021904 |
| 592 | 0/011541939 | 0/016091987 | 0/021830946 | **1592** | 0/002604 | 0/016348 | 0/021904 |
| 593 | 0/011541939 | 0/016091987 | 0/021830946 | **1593** | 0/002604 | 0/016348 | 0/021904 |
| 594 | 0/011541939 | 0/016091987 | 0/021830946 | **1594** | 0/002604 | 0/016348 | 0/021904 |
| 595 | 0/011541939 | 0/016091987 | 0/021830946 | **1595** | 0/002604 | 0/016348 | 0/021904 |
| 596 | 0/011541939 | 0/016091987 | 0/021830946 | **1596** | 0/002604 | 0/016348 | 0/021904 |
| 597 | 0/011541939 | 0/016091987 | 0/021830946 | **1597** | 0/002604 | 0/016348 | 0/021904 |
| 598 | 0/011541939 | 0/016091987 | 0/021830946 | **1598** | 0/002604 | 0/016348 | 0/021904 |
| 599 | 0/011541939 | 0/016091987 | 0/021830946 | **1599** | 0/002604 | 0/016348 | 0/021904 |
| 600 | 0/011541939 | 0/016091987 | 0/021830946 | **1600** | 0/002604 | 0/016348 | 0/021904 |
| 601 | 0/011541939 | 0/016091987 | 0/021830946 | **1601** | 0/002604 | 0/016348 | 0/021904 |
| 602 | 0/011541939 | 0/016091987 | 0/021279581 | **1602** | 0/002592 | 0/016348 | 0/021904 |
| 603 | 0/011541939 | 0/016091987 | 0/021279581 | **1603** | 0/002592 | 0/016348 | 0/021904 |
| 604 | 0/011541939 | 0/016091987 | 0/021279581 | **1604** | 0/002592 | 0/016348 | 0/021904 |
| 605 | 0/011541939 | 0/016091987 | 0/021279581 | **1605** | 0/002592 | 0/016348 | 0/021904 |
| 606 | 0/011541939 | 0/016091987 | 0/021279581 | **1606** | 0/002592 | 0/016348 | 0/021904 |
| 607 | 0/011541939 | 0/016091987 | 0/021279581 | **1607** | 0/002592 | 0/016348 | 0/021904 |
| 608 | 0/011541939 | 0/016091987 | 0/021279581 | **1608** | 0/002592 | 0/016348 | 0/021904 |
| 609 | 0/011541939 | 0/016091987 | 0/021279581 | **1609** | 0/002592 | 0/016348 | 0/021904 |
| 610 | 0/011541939 | 0/016091987 | 0/021279581 | **1610** | 0/002592 | 0/016348 | 0/021904 |
| 611 | 0/011541939 | 0/016091987 | 0/021279581 | **1611** | 0/002592 | 0/016348 | 0/021904 |
| 612 | 0/011541939 | 0/016091987 | 0/021279581 | **1612** | 0/002592 | 0/016348 | 0/021904 |
| 613 | 0/011541939 | 0/016091987 | 0/021279581 | **1613** | 0/002592 | 0/016348 | 0/021904 |
| 614 | 0/011541939 | 0/016091987 | 0/021279581 | **1614** | 0/002592 | 0/016348 | 0/021904 |
| 615 | 0/011541939 | 0/016091987 | 0/021279581 | **1615** | 0/002592 | 0/016348 | 0/021904 |
| 616 | 0/011541939 | 0/016091987 | 0/021279581 | **1616** | 0/002592 | 0/016348 | 0/021904 |
| 617 | 0/011541939 | 0/016091987 | 0/021279581 | **1617** | 0/002592 | 0/016348 | 0/021904 |
| 618 | 0/011541939 | 0/016091987 | 0/021279581 | **1618** | 0/002592 | 0/016348 | 0/021904 |
| 619 | 0/011541939 | 0/016091987 | 0/021279581 | **1619** | 0/002592 | 0/016348 | 0/021904 |
| 620 | 0/011541939 | 0/016091987 | 0/021279581 | **1620** | 0/002592 | 0/016348 | 0/021904 |
| 621 | 0/011541939 | 0/016091987 | 0/021279581 | **1621** | 0/002592 | 0/016348 | 0/021904 |
| 622 | 0/011541939 | 0/016091987 | 0/021279581 | **1622** | 0/002592 | 0/016348 | 0/021904 |
| 623 | 0/011541939 | 0/016091987 | 0/021279581 | **1623** | 0/002592 | 0/016348 | 0/021904 |
| 624 | 0/011541939 | 0/016091987 | 0/021279581 | **1624** | 0/002592 | 0/016348 | 0/021904 |
| 625 | 0/011541939 | 0/016091987 | 0/021279581 | **1625** | 0/002592 | 0/016348 | 0/021904 |
| 626 | 0/011541939 | 0/016091987 | 0/021279581 | **1626** | 0/002592 | 0/016348 | 0/021904 |
| 627 | 0/011541939 | 0/016091987 | 0/021279581 | **1627** | 0/002592 | 0/016348 | 0/021904 |
| 628 | 0/011541939 | 0/016091987 | 0/021279581 | **1628** | 0/002592 | 0/016348 | 0/021904 |
| 629 | 0/011541939 | 0/016091987 | 0/021279581 | **1629** | 0/002592 | 0/016348 | 0/021904 |
| 630 | 0/011541939 | 0/016091987 | 0/021279581 | **1630** | 0/002592 | 0/016348 | 0/021904 |
| 631 | 0/011541939 | 0/016091987 | 0/021279581 | **1631** | 0/002592 | 0/016348 | 0/021904 |
| 632 | 0/011541939 | 0/016091987 | 0/021279581 | **1632** | 0/002592 | 0/016348 | 0/021904 |
| 633 | 0/011541939 | 0/016091987 | 0/021279581 | **1633** | 0/002592 | 0/016348 | 0/021904 |
| 634 | 0/011541939 | 0/016091987 | 0/021279581 | **1634** | 0/002592 | 0/016348 | 0/021904 |
| 635 | 0/011541939 | 0/016091987 | 0/021279581 | **1635** | 0/002592 | 0/016348 | 0/021904 |
| 636 | 0/011541939 | 0/016091987 | 0/021279581 | **1636** | 0/002592 | 0/016348 | 0/021904 |
| 637 | 0/011541939 | 0/016091987 | 0/021279581 | **1637** | 0/002592 | 0/016348 | 0/021904 |
| 638 | 0/011541939 | 0/016091987 | 0/021279581 | **1638** | 0/002592 | 0/016348 | 0/021904 |
| 639 | 0/011541939 | 0/016091987 | 0/021279581 | **1639** | 0/002592 | 0/016348 | 0/021904 |
| 640 | 0/011541939 | 0/016091987 | 0/021279581 | **1640** | 0/002592 | 0/016348 | 0/021904 |
| 641 | 0/011541939 | 0/016091987 | 0/021279581 | **1641** | 0/002592 | 0/016348 | 0/021904 |
| 642 | 0/011541939 | 0/016091987 | 0/021279581 | **1642** | 0/002592 | 0/016348 | 0/021904 |
| 643 | 0/011541939 | 0/016091987 | 0/021279581 | **1643** | 0/002592 | 0/016348 | 0/021904 |
| 644 | 0/011541939 | 0/016091987 | 0/021279581 | **1644** | 0/002592 | 0/016348 | 0/021904 |
| 645 | 0/011541939 | 0/016091987 | 0/021279581 | **1645** | 0/002592 | 0/016348 | 0/021904 |
| 646 | 0/011541939 | 0/016091987 | 0/021279581 | **1646** | 0/002592 | 0/016348 | 0/021904 |
| 647 | 0/011541939 | 0/016091987 | 0/021279581 | **1647** | 0/002592 | 0/016348 | 0/021904 |
| 648 | 0/011541939 | 0/016091987 | 0/021279581 | **1648** | 0/002592 | 0/016348 | 0/021904 |
| 649 | 0/011541939 | 0/016091987 | 0/021279581 | **1649** | 0/002592 | 0/016348 | 0/021904 |
| 650 | 0/011541939 | 0/016091987 | 0/021279581 | **1650** | 0/002592 | 0/016348 | 0/021904 |
| 651 | 0/011541939 | 0/016091987 | 0/021279581 | **1651** | 0/002592 | 0/016348 | 0/021904 |
| 652 | 0/011541939 | 0/016091987 | 0/021279581 | **1652** | 0/002592 | 0/016348 | 0/021904 |
| 653 | 0/011541939 | 0/016091987 | 0/021279581 | **1653** | 0/002592 | 0/016348 | 0/021904 |
| 654 | 0/011541939 | 0/016091987 | 0/021279581 | **1654** | 0/002592 | 0/016348 | 0/021904 |
| 655 | 0/011541939 | 0/016091987 | 0/021279581 | **1655** | 0/002592 | 0/016348 | 0/021904 |
| 656 | 0/011541939 | 0/016091987 | 0/021279581 | **1656** | 0/002592 | 0/016348 | 0/021904 |
| 657 | 0/011541939 | 0/016091987 | 0/021279581 | **1657** | 0/002592 | 0/016348 | 0/021904 |
| 658 | 0/011541939 | 0/016091987 | 0/021279581 | **1658** | 0/002592 | 0/016348 | 0/021904 |
| 659 | 0/011541939 | 0/016091987 | 0/021279581 | **1659** | 0/002592 | 0/016348 | 0/021904 |
| 660 | 0/011541939 | 0/016091987 | 0/021279581 | **1660** | 0/002592 | 0/016348 | 0/021904 |
| 661 | 0/011541939 | 0/016091987 | 0/021279581 | **1661** | 0/002592 | 0/016348 | 0/021904 |
| 662 | 0/011541939 | 0/016091987 | 0/021279581 | **1662** | 0/002592 | 0/016348 | 0/021904 |
| 663 | 0/011541939 | 0/016091987 | 0/021279581 | **1663** | 0/002592 | 0/016348 | 0/021904 |
| 664 | 0/011541939 | 0/016091987 | 0/021279581 | **1664** | 0/002592 | 0/016348 | 0/021904 |
| 665 | 0/011541939 | 0/016091987 | 0/021279581 | **1665** | 0/002592 | 0/016348 | 0/021904 |
| 666 | 0/011340466 | 0/016091987 | 0/020887279 | **1666** | 0/002592 | 0/016348 | 0/021904 |
| 667 | 0/011340466 | 0/016091987 | 0/020887279 | **1667** | 0/002592 | 0/016348 | 0/021904 |
| 668 | 0/011340466 | 0/016091987 | 0/020887279 | **1668** | 0/002592 | 0/016348 | 0/021904 |
| 669 | 0/011340466 | 0/016091987 | 0/020887279 | **1669** | 0/002592 | 0/016348 | 0/021904 |
| 670 | 0/011340466 | 0/016091987 | 0/020887279 | **1670** | 0/002592 | 0/016348 | 0/021904 |
| 671 | 0/011340466 | 0/016091987 | 0/020887279 | **1671** | 0/002592 | 0/016348 | 0/021904 |
| 672 | 0/011340466 | 0/016091987 | 0/020887279 | **1672** | 0/002592 | 0/016348 | 0/021904 |
| 673 | 0/011340466 | 0/016091987 | 0/020887279 | **1673** | 0/002592 | 0/016348 | 0/021904 |
| 674 | 0/011340466 | 0/016091987 | 0/020887279 | **1674** | 0/002592 | 0/016348 | 0/021904 |
| 675 | 0/011340466 | 0/016091987 | 0/020887279 | **1675** | 0/002592 | 0/016348 | 0/021904 |
| 676 | 0/011340466 | 0/016091987 | 0/020887279 | **1676** | 0/002592 | 0/016348 | 0/021904 |
| 677 | 0/011340466 | 0/016091987 | 0/020887279 | **1677** | 0/002592 | 0/016348 | 0/021904 |
| 678 | 0/011340466 | 0/016091987 | 0/020887279 | **1678** | 0/002592 | 0/016348 | 0/021904 |
| 679 | 0/011340466 | 0/016091987 | 0/020887279 | **1679** | 0/002592 | 0/016348 | 0/021904 |
| 680 | 0/011340466 | 0/016091987 | 0/020887279 | **1680** | 0/002592 | 0/016348 | 0/021904 |
| 681 | 0/011340466 | 0/016091987 | 0/020887279 | **1681** | 0/002592 | 0/016348 | 0/021904 |
| 682 | 0/011340466 | 0/016091987 | 0/020887279 | **1682** | 0/002592 | 0/016348 | 0/021904 |
| 683 | 0/011340466 | 0/016091987 | 0/020887279 | **1683** | 0/002592 | 0/016348 | 0/021904 |
| 684 | 0/011340466 | 0/016091987 | 0/020887279 | **1684** | 0/002592 | 0/016348 | 0/021904 |
| 685 | 0/011340466 | 0/016091987 | 0/020887279 | **1685** | 0/002592 | 0/016348 | 0/021904 |
| 686 | 0/011340466 | 0/016091987 | 0/020887279 | **1686** | 0/002592 | 0/016348 | 0/021904 |
| 687 | 0/011340466 | 0/016091987 | 0/020887279 | **1687** | 0/002592 | 0/016348 | 0/021904 |
| 688 | 0/011340466 | 0/016091987 | 0/020887279 | **1688** | 0/002592 | 0/016348 | 0/021904 |
| 689 | 0/011340466 | 0/016091987 | 0/020887279 | **1689** | 0/002592 | 0/016348 | 0/021904 |
| 690 | 0/011340466 | 0/016091987 | 0/020887279 | **1690** | 0/002592 | 0/016348 | 0/021904 |
| 691 | 0/011340466 | 0/016091987 | 0/020887279 | **1691** | 0/002592 | 0/016348 | 0/021812 |
| 692 | 0/011340466 | 0/016091987 | 0/020887279 | **1692** | 0/002592 | 0/016348 | 0/021812 |
| 693 | 0/011340466 | 0/016091987 | 0/020887279 | **1693** | 0/002592 | 0/016348 | 0/021812 |
| 694 | 0/011340466 | 0/016091987 | 0/020887279 | **1694** | 0/002592 | 0/016348 | 0/021812 |
| 695 | 0/011340466 | 0/016091987 | 0/020887279 | **1695** | 0/002592 | 0/016348 | 0/021812 |
| 696 | 0/011340466 | 0/016091987 | 0/020887279 | **1696** | 0/002592 | 0/016348 | 0/021812 |
| 697 | 0/011340466 | 0/016091987 | 0/020887279 | **1697** | 0/002592 | 0/016348 | 0/021812 |
| 698 | 0/011340466 | 0/015982881 | 0/020887279 | **1698** | 0/002592 | 0/016348 | 0/021812 |
| 699 | 0/011340466 | 0/015982881 | 0/020887279 | **1699** | 0/002592 | 0/016348 | 0/021812 |
| 700 | 0/011340466 | 0/015982881 | 0/020887279 | **1700** | 0/002592 | 0/016348 | 0/021812 |
| 701 | 0/011340466 | 0/015982881 | 0/020887279 | **1701** | 0/002592 | 0/016348 | 0/021812 |
| 702 | 0/011340466 | 0/015982881 | 0/020887279 | **1702** | 0/002592 | 0/016348 | 0/021812 |
| 703 | 0/011340466 | 0/015982881 | 0/020887279 | **1703** | 0/002592 | 0/016348 | 0/021812 |
| 704 | 0/011340466 | 0/015982881 | 0/020887279 | **1704** | 0/002592 | 0/016348 | 0/021812 |
| 705 | 0/011340466 | 0/015982881 | 0/020887279 | **1705** | 0/002592 | 0/016348 | 0/021812 |
| 706 | 0/011340466 | 0/015982881 | 0/020887279 | **1706** | 0/002592 | 0/016348 | 0/021812 |
| 707 | 0/011340466 | 0/015982881 | 0/020887279 | **1707** | 0/002592 | 0/016348 | 0/021812 |
| 708 | 0/011340466 | 0/015982881 | 0/020887279 | **1708** | 0/002592 | 0/016348 | 0/021812 |
| 709 | 0/011340466 | 0/015982881 | 0/020887279 | **1709** | 0/002592 | 0/016348 | 0/021812 |
| 710 | 0/011340466 | 0/015982881 | 0/020887279 | **1710** | 0/002592 | 0/016348 | 0/021812 |
| 711 | 0/011340466 | 0/015982881 | 0/020887279 | **1711** | 0/002592 | 0/016348 | 0/021812 |
| 712 | 0/011340466 | 0/015982881 | 0/020887279 | **1712** | 0/002592 | 0/016348 | 0/021812 |
| 713 | 0/011340466 | 0/015982881 | 0/020887279 | **1713** | 0/002592 | 0/016348 | 0/021812 |
| 714 | 0/011340466 | 0/015982881 | 0/020887279 | **1714** | 0/002592 | 0/016348 | 0/021812 |
| 715 | 0/011340466 | 0/015982881 | 0/020887279 | **1715** | 0/002592 | 0/016348 | 0/021812 |
| 716 | 0/011340466 | 0/015982881 | 0/020065867 | **1716** | 0/002592 | 0/016348 | 0/021812 |
| 717 | 0/011340466 | 0/015982881 | 0/020065867 | **1717** | 0/002592 | 0/016348 | 0/021812 |
| 718 | 0/011340466 | 0/015982881 | 0/020065867 | **1718** | 0/002592 | 0/016348 | 0/021812 |
| 719 | 0/011340466 | 0/015982881 | 0/020065867 | **1719** | 0/002592 | 0/016348 | 0/021812 |
| 720 | 0/011340466 | 0/015982881 | 0/020065867 | **1720** | 0/002592 | 0/016348 | 0/021812 |
| 721 | 0/011340466 | 0/015982881 | 0/020065867 | **1721** | 0/002592 | 0/016348 | 0/021812 |
| 722 | 0/011340466 | 0/015982881 | 0/020065867 | **1722** | 0/002592 | 0/016348 | 0/021812 |
| 723 | 0/011340466 | 0/015982881 | 0/020065867 | **1723** | 0/002592 | 0/016348 | 0/021812 |
| 724 | 0/011340466 | 0/015982881 | 0/020065867 | **1724** | 0/002592 | 0/016348 | 0/021812 |
| 725 | 0/011340466 | 0/015982881 | 0/020065867 | **1725** | 0/002592 | 0/016348 | 0/021812 |
| 726 | 0/011340466 | 0/015982881 | 0/020065867 | **1726** | 0/002592 | 0/016348 | 0/021812 |
| 727 | 0/011340466 | 0/015982881 | 0/020065867 | **1727** | 0/002592 | 0/016348 | 0/021812 |
| 728 | 0/011340466 | 0/015982881 | 0/020065867 | **1728** | 0/002592 | 0/016348 | 0/021812 |
| 729 | 0/011340466 | 0/015982881 | 0/020065867 | **1729** | 0/002592 | 0/016348 | 0/021812 |
| 730 | 0/011340466 | 0/015982881 | 0/020065867 | **1730** | 0/002592 | 0/016348 | 0/021812 |
| 731 | 0/011340466 | 0/015982881 | 0/020065867 | **1731** | 0/002592 | 0/016348 | 0/021812 |
| 732 | 0/011340466 | 0/015982881 | 0/020065867 | **1732** | 0/002592 | 0/016348 | 0/021812 |
| 733 | 0/011247671 | 0/015982881 | 0/020065867 | **1733** | 0/002592 | 0/016348 | 0/021812 |
| 734 | 0/011247671 | 0/015982881 | 0/020065867 | **1734** | 0/002592 | 0/016348 | 0/021812 |
| 735 | 0/011247671 | 0/015982881 | 0/020065867 | **1735** | 0/002592 | 0/016348 | 0/021812 |
| 736 | 0/011247671 | 0/015982881 | 0/020065867 | **1736** | 0/002592 | 0/016348 | 0/021812 |
| 737 | 0/011247671 | 0/015982881 | 0/020065867 | **1737** | 0/002592 | 0/016348 | 0/021812 |
| 738 | 0/011247671 | 0/015982881 | 0/020065867 | **1738** | 0/002592 | 0/016348 | 0/021812 |
| 739 | 0/011247671 | 0/015982881 | 0/020065867 | **1739** | 0/002592 | 0/016348 | 0/021812 |
| 740 | 0/011247671 | 0/015982881 | 0/020065867 | **1740** | 0/002592 | 0/016348 | 0/021812 |
| 741 | 0/011247671 | 0/015982881 | 0/020065867 | **1741** | 0/002592 | 0/016348 | 0/021812 |
| 742 | 0/011247671 | 0/015982881 | 0/020065867 | **1742** | 0/002592 | 0/016348 | 0/021812 |
| 743 | 0/011247671 | 0/015982881 | 0/020065867 | **1743** | 0/002592 | 0/016348 | 0/021812 |
| 744 | 0/011247671 | 0/015982881 | 0/020065867 | **1744** | 0/002592 | 0/016348 | 0/021812 |
| 745 | 0/011247671 | 0/015982881 | 0/020065867 | **1745** | 0/002592 | 0/016348 | 0/021812 |
| 746 | 0/011247671 | 0/015982881 | 0/020065867 | **1746** | 0/002592 | 0/016348 | 0/021812 |
| 747 | 0/011247671 | 0/015982881 | 0/020065867 | **1747** | 0/002592 | 0/016348 | 0/021812 |
| 748 | 0/011247671 | 0/015982881 | 0/020065867 | **1748** | 0/002592 | 0/016348 | 0/021812 |
| 749 | 0/011247671 | 0/015982881 | 0/020065867 | **1749** | 0/002592 | 0/016348 | 0/021812 |
| 750 | 0/011247671 | 0/015982881 | 0/020065867 | **1750** | 0/002592 | 0/016348 | 0/021812 |
| 751 | 0/011247671 | 0/015982881 | 0/020065867 | **1751** | 0/002592 | 0/016348 | 0/021812 |
| 752 | 0/011247671 | 0/015982881 | 0/020065867 | **1752** | 0/002592 | 0/016348 | 0/021812 |
| 753 | 0/011247671 | 0/015982881 | 0/020065867 | **1753** | 0/002592 | 0/016348 | 0/021812 |
| 754 | 0/011247671 | 0/015982881 | 0/020065867 | **1754** | 0/002592 | 0/016348 | 0/021812 |
| 755 | 0/011247671 | 0/015982881 | 0/020065867 | **1755** | 0/002592 | 0/016348 | 0/021812 |
| 756 | 0/011247671 | 0/015982881 | 0/020065867 | **1756** | 0/002592 | 0/016348 | 0/021812 |
| 757 | 0/011247671 | 0/015883045 | 0/020065867 | **1757** | 0/002592 | 0/016348 | 0/021812 |
| 758 | 0/011247671 | 0/015883045 | 0/020065867 | **1758** | 0/002592 | 0/016348 | 0/021812 |
| 759 | 0/011247671 | 0/015883045 | 0/020065867 | **1759** | 0/002592 | 0/016348 | 0/021812 |
| 760 | 0/011247671 | 0/015883045 | 0/020065867 | **1760** | 0/002592 | 0/016348 | 0/021812 |
| 761 | 0/011247671 | 0/015883045 | 0/020065867 | **1761** | 0/002592 | 0/016348 | 0/021812 |
| 762 | 0/011247671 | 0/015883045 | 0/020065867 | **1762** | 0/002592 | 0/016348 | 0/021812 |
| 763 | 0/011247671 | 0/015883045 | 0/020065867 | **1763** | 0/002592 | 0/016348 | 0/021812 |
| 764 | 0/011247671 | 0/015883045 | 0/020065867 | **1764** | 0/002592 | 0/016348 | 0/021812 |
| 765 | 0/011247671 | 0/015883045 | 0/020065867 | **1765** | 0/002592 | 0/016348 | 0/021812 |
| 766 | 0/011247671 | 0/015883045 | 0/020065867 | **1766** | 0/002592 | 0/016348 | 0/021812 |
| 767 | 0/011247671 | 0/015883045 | 0/020065867 | **1767** | 0/002592 | 0/016348 | 0/021812 |
| 768 | 0/011247671 | 0/015883045 | 0/020065867 | **1768** | 0/002592 | 0/016348 | 0/021812 |
| 769 | 0/011247671 | 0/015883045 | 0/020065867 | **1769** | 0/002592 | 0/016348 | 0/021812 |
| 770 | 0/011247671 | 0/015883045 | 0/020065867 | **1770** | 0/002592 | 0/016348 | 0/021812 |
| 771 | 0/011247671 | 0/015883045 | 0/020065867 | **1771** | 0/002592 | 0/016348 | 0/021812 |
| 772 | 0/011247671 | 0/015883045 | 0/020065867 | **1772** | 0/002592 | 0/016348 | 0/021812 |
| 773 | 0/011247671 | 0/015883045 | 0/020065867 | **1773** | 0/002592 | 0/016348 | 0/021812 |
| 774 | 0/011247671 | 0/015883045 | 0/020065867 | **1774** | 0/002592 | 0/016348 | 0/021812 |
| 775 | 0/011247671 | 0/015883045 | 0/020065867 | **1775** | 0/002592 | 0/016348 | 0/021812 |
| 776 | 0/011247671 | 0/015883045 | 0/020065867 | **1776** | 0/002592 | 0/016348 | 0/021812 |
| 777 | 0/011247671 | 0/015883045 | 0/020065867 | **1777** | 0/002592 | 0/016348 | 0/021812 |
| 778 | 0/011247671 | 0/015883045 | 0/020065867 | **1778** | 0/002592 | 0/016348 | 0/021812 |
| 779 | 0/011247671 | 0/015883045 | 0/020065867 | **1779** | 0/002592 | 0/016348 | 0/021812 |
| 780 | 0/011247671 | 0/015883045 | 0/020065867 | **1780** | 0/002592 | 0/016348 | 0/021812 |
| 781 | 0/011247671 | 0/015883045 | 0/020065867 | **1781** | 0/002592 | 0/016348 | 0/021812 |
| 782 | 0/011247671 | 0/015883045 | 0/020065867 | **1782** | 0/002592 | 0/016348 | 0/021812 |
| 783 | 0/011247671 | 0/015883045 | 0/020065867 | **1783** | 0/002592 | 0/016348 | 0/021812 |
| 784 | 0/011247671 | 0/015883045 | 0/020065867 | **1784** | 0/002592 | 0/016348 | 0/021812 |
| 785 | 0/011247671 | 0/015883045 | 0/020065867 | **1785** | 0/002592 | 0/016348 | 0/021812 |
| 786 | 0/011247671 | 0/015883045 | 0/020065867 | **1786** | 0/002592 | 0/016348 | 0/021812 |
| 787 | 0/011247671 | 0/015883045 | 0/020065867 | **1787** | 0/002592 | 0/016348 | 0/021812 |
| 788 | 0/011247671 | 0/015883045 | 0/020065867 | **1788** | 0/002592 | 0/016348 | 0/021812 |
| 789 | 0/011247671 | 0/015883045 | 0/020065867 | **1789** | 0/002592 | 0/016348 | 0/021812 |
| 790 | 0/011247671 | 0/015883045 | 0/020065867 | **1790** | 0/002592 | 0/016348 | 0/021812 |
| 791 | 0/011247671 | 0/015883045 | 0/020065867 | **1791** | 0/002592 | 0/016348 | 0/021812 |
| 792 | 0/011247671 | 0/015883045 | 0/020065867 | **1792** | 0/002592 | 0/016348 | 0/021812 |
| 793 | 0/011247671 | 0/015883045 | 0/020065867 | **1793** | 0/002592 | 0/016348 | 0/021812 |
| 794 | 0/011247671 | 0/015883045 | 0/020065867 | **1794** | 0/002592 | 0/016348 | 0/021812 |
| 795 | 0/011247671 | 0/015883045 | 0/020065867 | **1795** | 0/002592 | 0/016348 | 0/021812 |
| 796 | 0/011247671 | 0/015883045 | 0/020065867 | **1796** | 0/002592 | 0/016348 | 0/021812 |
| 797 | 0/011247671 | 0/015883045 | 0/020065867 | **1797** | 0/002592 | 0/016348 | 0/021812 |
| 798 | 0/011247671 | 0/015883045 | 0/020065867 | **1798** | 0/002592 | 0/016348 | 0/021812 |
| 799 | 0/011247671 | 0/015883045 | 0/020065867 | **1799** | 0/002592 | 0/016348 | 0/021812 |
| 800 | 0/011247671 | 0/015883045 | 0/020065867 | **1800** | 0/002592 | 0/016348 | 0/021812 |
| 801 | 0/011247671 | 0/015883045 | 0/020065867 | **1801** | 0/002592 | 0/016348 | 0/021812 |
| 802 | 0/011247671 | 0/015883045 | 0/020065867 | **1802** | 0/002592 | 0/016348 | 0/021812 |
| 803 | 0/011247671 | 0/015883045 | 0/020065867 | **1803** | 0/002592 | 0/016348 | 0/021812 |
| 804 | 0/011247671 | 0/015883045 | 0/020065867 | **1804** | 0/002592 | 0/016348 | 0/021812 |
| 805 | 0/011247671 | 0/015883045 | 0/020065867 | **1805** | 0/002592 | 0/016348 | 0/021812 |
| 806 | 0/011247671 | 0/015883045 | 0/020065867 | **1806** | 0/002592 | 0/016348 | 0/021812 |
| 807 | 0/011247671 | 0/015883045 | 0/020065867 | **1807** | 0/002592 | 0/016348 | 0/021812 |
| 808 | 0/011247671 | 0/015883045 | 0/020065867 | **1808** | 0/002592 | 0/016348 | 0/021812 |
| 809 | 0/011239858 | 0/015883045 | 0/020065867 | **1809** | 0/002592 | 0/016348 | 0/021812 |
| 810 | 0/011239858 | 0/015883045 | 0/020065867 | **1810** | 0/002592 | 0/016348 | 0/021812 |
| 811 | 0/011239858 | 0/015883045 | 0/020065867 | **1811** | 0/002592 | 0/016348 | 0/021812 |
| 812 | 0/011239858 | 0/015883045 | 0/020065867 | **1812** | 0/002592 | 0/016348 | 0/021812 |
| 813 | 0/011239858 | 0/015883045 | 0/020065867 | **1813** | 0/002592 | 0/016348 | 0/021812 |
| 814 | 0/011239858 | 0/015883045 | 0/020065867 | **1814** | 0/002592 | 0/016348 | 0/021812 |
| 815 | 0/011239858 | 0/015883045 | 0/020065867 | **1815** | 0/002592 | 0/016348 | 0/021812 |
| 816 | 0/011239858 | 0/015883045 | 0/020065867 | **1816** | 0/002592 | 0/016348 | 0/021812 |
| 817 | 0/011239858 | 0/015883045 | 0/020065867 | **1817** | 0/002592 | 0/016348 | 0/021812 |
| 818 | 0/011239858 | 0/015883045 | 0/020065867 | **1818** | 0/002592 | 0/016348 | 0/021812 |
| 819 | 0/011239858 | 0/015883045 | 0/020065867 | **1819** | 0/002592 | 0/016348 | 0/021812 |
| 820 | 0/011239858 | 0/015883045 | 0/020065867 | **1820** | 0/002592 | 0/016348 | 0/021812 |
| 821 | 0/011239858 | 0/015883045 | 0/020065867 | **1821** | 0/002592 | 0/016348 | 0/021812 |
| 822 | 0/011239858 | 0/015883045 | 0/020065867 | **1822** | 0/002592 | 0/016348 | 0/021812 |
| 823 | 0/011239858 | 0/015883045 | 0/020065867 | **1823** | 0/002592 | 0/016348 | 0/021812 |
| 824 | 0/011239858 | 0/015883045 | 0/020065867 | **1824** | 0/002592 | 0/016348 | 0/021812 |
| 825 | 0/011239858 | 0/015883045 | 0/020065867 | **1825** | 0/002592 | 0/016348 | 0/021812 |
| 826 | 0/011239858 | 0/015883045 | 0/020065867 | **1826** | 0/002592 | 0/016348 | 0/021812 |
| 827 | 0/011239858 | 0/015883045 | 0/020065867 | **1827** | 0/002592 | 0/016348 | 0/021812 |
| 828 | 0/011239858 | 0/015883045 | 0/020065867 | **1828** | 0/002592 | 0/016348 | 0/021812 |
| 829 | 0/011239858 | 0/015883045 | 0/020065867 | **1829** | 0/002592 | 0/016348 | 0/021812 |
| 830 | 0/011239858 | 0/015883045 | 0/020065867 | **1830** | 0/002592 | 0/016348 | 0/021812 |
| 831 | 0/011239858 | 0/015883045 | 0/020065867 | **1831** | 0/002592 | 0/016348 | 0/021812 |
| 832 | 0/011239858 | 0/015883045 | 0/020065867 | **1832** | 0/002592 | 0/016348 | 0/021812 |
| 833 | 0/011239858 | 0/015883045 | 0/020065867 | **1833** | 0/002592 | 0/016348 | 0/021812 |
| 834 | 0/011239858 | 0/015883045 | 0/020065867 | **1834** | 0/002592 | 0/016348 | 0/021812 |
| 835 | 0/011239858 | 0/015883045 | 0/020065867 | **1835** | 0/002592 | 0/016348 | 0/021812 |
| 836 | 0/011239858 | 0/015883045 | 0/020065867 | **1836** | 0/002592 | 0/016348 | 0/021812 |
| 837 | 0/011239858 | 0/015883045 | 0/020065867 | **1837** | 0/00259 | 0/016348 | 0/021812 |
| 838 | 0/011239858 | 0/015883045 | 0/020065867 | **1838** | 0/00259 | 0/016348 | 0/021812 |
| 839 | 0/011239858 | 0/015883045 | 0/020065867 | **1839** | 0/00259 | 0/016348 | 0/021812 |
| 840 | 0/011239858 | 0/015883045 | 0/020065867 | **1840** | 0/00259 | 0/016348 | 0/021812 |
| 841 | 0/011239858 | 0/015883045 | 0/020065867 | **1841** | 0/00259 | 0/016348 | 0/021812 |
| 842 | 0/011239858 | 0/015883045 | 0/020065867 | **1842** | 0/00259 | 0/016348 | 0/021812 |
| 843 | 0/011239858 | 0/015883045 | 0/020065867 | **1843** | 0/00259 | 0/016348 | 0/021812 |
| 844 | 0/011239858 | 0/015883045 | 0/020065867 | **1844** | 0/00259 | 0/016348 | 0/021812 |
| 845 | 0/011239858 | 0/015883045 | 0/020065867 | **1845** | 0/00259 | 0/016348 | 0/021812 |
| 846 | 0/011239858 | 0/015883045 | 0/020065867 | **1846** | 0/00259 | 0/016348 | 0/021812 |
| 847 | 0/011239858 | 0/015883045 | 0/020065867 | **1847** | 0/00259 | 0/016348 | 0/021812 |
| 848 | 0/011239858 | 0/015883045 | 0/020065867 | **1848** | 0/00259 | 0/016348 | 0/021812 |
| 849 | 0/011239858 | 0/015883045 | 0/020065867 | **1849** | 0/00259 | 0/016348 | 0/021812 |
| 850 | 0/011239858 | 0/015883045 | 0/020065867 | **1850** | 0/00259 | 0/016348 | 0/021812 |
| 851 | 0/011239858 | 0/015883045 | 0/020065867 | **1851** | 0/00259 | 0/016348 | 0/021812 |
| 852 | 0/011239858 | 0/015883045 | 0/020065867 | **1852** | 0/00259 | 0/016348 | 0/021812 |
| 853 | 0/011239858 | 0/015883045 | 0/020065867 | **1853** | 0/002587 | 0/016348 | 0/021812 |
| 854 | 0/011239858 | 0/015883045 | 0/020065867 | **1854** | 0/002587 | 0/016348 | 0/021812 |
| 855 | 0/011239858 | 0/015883045 | 0/020065867 | **1855** | 0/002587 | 0/016348 | 0/021812 |
| 856 | 0/011239858 | 0/015883045 | 0/020065867 | **1856** | 0/002587 | 0/016348 | 0/021812 |
| 857 | 0/011239858 | 0/015883045 | 0/020065867 | **1857** | 0/002587 | 0/016348 | 0/021812 |
| 858 | 0/011239858 | 0/015883045 | 0/020065867 | **1858** | 0/002587 | 0/016348 | 0/021812 |
| 859 | 0/011239858 | 0/015883045 | 0/020065867 | **1859** | 0/002587 | 0/016348 | 0/021812 |
| 860 | 0/011239858 | 0/015883045 | 0/020065867 | **1860** | 0/002587 | 0/016348 | 0/021812 |
| 861 | 0/011239858 | 0/015883045 | 0/020065867 | **1861** | 0/002587 | 0/016348 | 0/021812 |
| 862 | 0/011239858 | 0/015883045 | 0/020065867 | **1862** | 0/002587 | 0/016348 | 0/021812 |
| 863 | 0/011239858 | 0/015883045 | 0/020065867 | **1863** | 0/002587 | 0/016348 | 0/021812 |
| 864 | 0/011239858 | 0/015883045 | 0/020065867 | **1864** | 0/002587 | 0/016348 | 0/021812 |
| 865 | 0/011239858 | 0/015883045 | 0/020065867 | **1865** | 0/002587 | 0/016348 | 0/021812 |
| 866 | 0/011239858 | 0/015883045 | 0/020065867 | **1866** | 0/002587 | 0/016348 | 0/021812 |
| 867 | 0/011239858 | 0/015883045 | 0/020065867 | **1867** | 0/002587 | 0/016348 | 0/021812 |
| 868 | 0/011239858 | 0/015883045 | 0/020065867 | **1868** | 0/002587 | 0/016348 | 0/021812 |
| 869 | 0/011239858 | 0/015883045 | 0/020065867 | **1869** | 0/002587 | 0/016348 | 0/021695 |
| 870 | 0/011239858 | 0/015883045 | 0/020065867 | **1870** | 0/002587 | 0/016348 | 0/021695 |
| 871 | 0/011167454 | 0/015883045 | 0/020065867 | **1871** | 0/002579 | 0/016348 | 0/021695 |
| 872 | 0/011167454 | 0/015883045 | 0/020065867 | **1872** | 0/002579 | 0/016348 | 0/021695 |
| 873 | 0/011167454 | 0/015883045 | 0/020065867 | **1873** | 0/002579 | 0/016348 | 0/021695 |
| 874 | 0/011167454 | 0/015883045 | 0/020065867 | **1874** | 0/002579 | 0/016348 | 0/021695 |
| 875 | 0/011167454 | 0/015883045 | 0/020065867 | **1875** | 0/002579 | 0/016348 | 0/021695 |
| 876 | 0/011167454 | 0/015883045 | 0/020065867 | **1876** | 0/002579 | 0/016348 | 0/021695 |
| 877 | 0/011167454 | 0/015883045 | 0/020065867 | **1877** | 0/002579 | 0/016348 | 0/021695 |
| 878 | 0/011167454 | 0/015883045 | 0/020065867 | **1878** | 0/002579 | 0/016348 | 0/021695 |
| 879 | 0/011167454 | 0/015883045 | 0/020065867 | **1879** | 0/002579 | 0/016348 | 0/021695 |
| 880 | 0/011167454 | 0/015883045 | 0/020065867 | **1880** | 0/002579 | 0/016348 | 0/021695 |
| 881 | 0/011167454 | 0/015883045 | 0/020065867 | **1881** | 0/002579 | 0/016348 | 0/021695 |
| 882 | 0/011167454 | 0/015883045 | 0/020065867 | **1882** | 0/002579 | 0/016348 | 0/021695 |
| 883 | 0/011167454 | 0/015883045 | 0/020065867 | **1883** | 0/002579 | 0/016348 | 0/021695 |
| 884 | 0/011167454 | 0/015883045 | 0/020065867 | **1884** | 0/002579 | 0/016348 | 0/021695 |
| 885 | 0/011167454 | 0/015883045 | 0/020065867 | **1885** | 0/002579 | 0/016348 | 0/021695 |
| 886 | 0/011167454 | 0/015883045 | 0/020065867 | **1886** | 0/002579 | 0/016348 | 0/021695 |
| 887 | 0/011167454 | 0/015883045 | 0/020065867 | **1887** | 0/002579 | 0/016348 | 0/021695 |
| 888 | 0/011167454 | 0/015883045 | 0/020065867 | **1888** | 0/002579 | 0/016348 | 0/021695 |
| 889 | 0/011167454 | 0/015883045 | 0/020065867 | **1889** | 0/002579 | 0/016348 | 0/021695 |
| 890 | 0/011167454 | 0/015883045 | 0/020065867 | **1890** | 0/002579 | 0/016348 | 0/021695 |
| 891 | 0/011167454 | 0/015883045 | 0/020065867 | **1891** | 0/002579 | 0/016348 | 0/021695 |
| 892 | 0/011167454 | 0/015883045 | 0/020065867 | **1892** | 0/002579 | 0/016348 | 0/021695 |
| 893 | 0/011167454 | 0/015883045 | 0/020065867 | **1893** | 0/002579 | 0/016348 | 0/021695 |
| 894 | 0/011167454 | 0/015883045 | 0/020065867 | **1894** | 0/002579 | 0/016348 | 0/021695 |
| 895 | 0/011167454 | 0/015883045 | 0/020065867 | **1895** | 0/002579 | 0/016348 | 0/021695 |
| 896 | 0/011146574 | 0/015883045 | 0/020065867 | **1896** | 0/002579 | 0/016348 | 0/021695 |
| 897 | 0/011146574 | 0/015883045 | 0/020065867 | **1897** | 0/002579 | 0/016348 | 0/021695 |
| 898 | 0/011146574 | 0/015883045 | 0/020065867 | **1898** | 0/002579 | 0/016348 | 0/021695 |
| 899 | 0/011146574 | 0/015883045 | 0/020065867 | **1899** | 0/002579 | 0/016348 | 0/021695 |
| 900 | 0/011146574 | 0/015883045 | 0/020065867 | **1900** | 0/002579 | 0/016348 | 0/021695 |
| 901 | 0/011146574 | 0/015883045 | 0/020065867 | **1901** | 0/002579 | 0/016348 | 0/021695 |
| 902 | 0/011146574 | 0/015883045 | 0/020065867 | **1902** | 0/002579 | 0/016348 | 0/021695 |
| 903 | 0/011146574 | 0/015883045 | 0/020065867 | **1903** | 0/002579 | 0/016348 | 0/021695 |
| 904 | 0/011146574 | 0/015883045 | 0/020065867 | **1904** | 0/002579 | 0/016348 | 0/021695 |
| 905 | 0/011146574 | 0/015883045 | 0/020065867 | **1905** | 0/002579 | 0/016348 | 0/021695 |
| 906 | 0/011146574 | 0/015883045 | 0/020065867 | **1906** | 0/002579 | 0/016348 | 0/021695 |
| 907 | 0/011146574 | 0/015883045 | 0/020065867 | **1907** | 0/002579 | 0/016348 | 0/021695 |
| 908 | 0/011146574 | 0/015883045 | 0/020065867 | **1908** | 0/002579 | 0/016348 | 0/021695 |
| 909 | 0/011146574 | 0/015883045 | 0/020065867 | **1909** | 0/002579 | 0/016348 | 0/021695 |
| 910 | 0/011146574 | 0/015883045 | 0/020065867 | **1910** | 0/002577 | 0/016348 | 0/021695 |
| 911 | 0/011146574 | 0/015883045 | 0/020065867 | **1911** | 0/002577 | 0/016348 | 0/021695 |
| 912 | 0/011146574 | 0/015883045 | 0/020065867 | **1912** | 0/002577 | 0/016348 | 0/021695 |
| 913 | 0/011146574 | 0/015883045 | 0/020065867 | **1913** | 0/002577 | 0/016348 | 0/021695 |
| 914 | 0/011146574 | 0/015883045 | 0/020065867 | **1914** | 0/002577 | 0/016348 | 0/021695 |
| 915 | 0/011146574 | 0/015883045 | 0/020065867 | **1915** | 0/002576 | 0/016348 | 0/021695 |
| 916 | 0/011146574 | 0/015883045 | 0/020065867 | **1916** | 0/002576 | 0/016348 | 0/021695 |
| 917 | 0/011146574 | 0/015883045 | 0/020065867 | **1917** | 0/002576 | 0/016348 | 0/021695 |
| 918 | 0/011146574 | 0/015883045 | 0/020065867 | **1918** | 0/002576 | 0/016348 | 0/021695 |
| 919 | 0/011146574 | 0/015883045 | 0/020065867 | **1919** | 0/002576 | 0/016348 | 0/021695 |
| 920 | 0/011146574 | 0/015883045 | 0/020065867 | **1920** | 0/002576 | 0/016348 | 0/021695 |
| 921 | 0/011146574 | 0/015883045 | 0/020065867 | **1921** | 0/002576 | 0/016348 | 0/021695 |
| 922 | 0/011146574 | 0/015883045 | 0/020065867 | **1922** | 0/002576 | 0/016348 | 0/021695 |
| 923 | 0/011146574 | 0/015883045 | 0/020065867 | **1923** | 0/002576 | 0/016348 | 0/021695 |
| 924 | 0/011146574 | 0/015883045 | 0/020065867 | **1924** | 0/002576 | 0/016348 | 0/021695 |
| 925 | 0/011146574 | 0/015883045 | 0/020065867 | **1925** | 0/002576 | 0/016348 | 0/021695 |
| 926 | 0/011061816 | 0/015883045 | 0/020065867 | **1926** | 0/002576 | 0/016348 | 0/021695 |
| 927 | 0/011061816 | 0/015883045 | 0/020065867 | **1927** | 0/002576 | 0/016348 | 0/021695 |
| 928 | 0/011061816 | 0/015883045 | 0/020065867 | **1928** | 0/002576 | 0/016348 | 0/021695 |
| 929 | 0/011061816 | 0/015883045 | 0/019360797 | **1929** | 0/002576 | 0/016348 | 0/021695 |
| 930 | 0/011061816 | 0/015883045 | 0/019360797 | **1930** | 0/002576 | 0/016348 | 0/021695 |
| 931 | 0/011061816 | 0/015664085 | 0/019360797 | **1931** | 0/002576 | 0/016348 | 0/021695 |
| 932 | 0/011061816 | 0/015664085 | 0/019360797 | **1932** | 0/002569 | 0/016348 | 0/021695 |
| 933 | 0/011061816 | 0/015664085 | 0/019360797 | **1933** | 0/002569 | 0/016348 | 0/021695 |
| 934 | 0/011061816 | 0/015664085 | 0/019360797 | **1934** | 0/002569 | 0/016348 | 0/021695 |
| 935 | 0/011061816 | 0/015664085 | 0/019360797 | **1935** | 0/002569 | 0/016348 | 0/021695 |
| 936 | 0/011061816 | 0/015664085 | 0/019360797 | **1936** | 0/002569 | 0/016348 | 0/021695 |
| 937 | 0/011061816 | 0/015664085 | 0/019360797 | **1937** | 0/002569 | 0/016348 | 0/021695 |
| 938 | 0/011061816 | 0/015664085 | 0/019360797 | **1938** | 0/002569 | 0/016348 | 0/021695 |
| 939 | 0/011061816 | 0/015664085 | 0/019360797 | **1939** | 0/002569 | 0/016348 | 0/021695 |
| 940 | 0/011061816 | 0/015664085 | 0/019360797 | **1940** | 0/002569 | 0/016348 | 0/021695 |
| 941 | 0/011061816 | 0/015664085 | 0/019360797 | **1941** | 0/002569 | 0/016348 | 0/021695 |
| 942 | 0/011061816 | 0/015664085 | 0/019360797 | **1942** | 0/002569 | 0/016348 | 0/021695 |
| 943 | 0/011061816 | 0/015664085 | 0/019360797 | **1943** | 0/002569 | 0/016348 | 0/021609 |
| 944 | 0/011061816 | 0/015664085 | 0/019360797 | **1944** | 0/002569 | 0/016348 | 0/021609 |
| 945 | 0/011061816 | 0/015664085 | 0/019360797 | **1945** | 0/002569 | 0/016348 | 0/021609 |
| 946 | 0/011061816 | 0/015664085 | 0/019360797 | **1946** | 0/002569 | 0/016348 | 0/021609 |
| 947 | 0/011061816 | 0/015664085 | 0/019360797 | **1947** | 0/002569 | 0/016348 | 0/021609 |
| 948 | 0/011061816 | 0/015664085 | 0/019360797 | **1948** | 0/002564 | 0/016348 | 0/021609 |
| 949 | 0/011061816 | 0/015664085 | 0/019360797 | **1949** | 0/002564 | 0/016348 | 0/021609 |
| 950 | 0/011061816 | 0/015664085 | 0/019360797 | **1950** | 0/002564 | 0/016348 | 0/021609 |
| 951 | 0/011061816 | 0/015664085 | 0/019360797 | **1951** | 0/002564 | 0/016348 | 0/021609 |
| 952 | 0/011061816 | 0/015664085 | 0/019360797 | **1952** | 0/002564 | 0/016348 | 0/021518 |
| 953 | 0/011061816 | 0/015664085 | 0/019360797 | **1953** | 0/002564 | 0/016348 | 0/021518 |
| 954 | 0/011061816 | 0/015664085 | 0/019360797 | **1954** | 0/002564 | 0/016348 | 0/021518 |
| 955 | 0/011061816 | 0/015664085 | 0/019360797 | **1955** | 0/002564 | 0/016348 | 0/021518 |
| 956 | 0/011061816 | 0/015664085 | 0/019360797 | **1956** | 0/002564 | 0/016348 | 0/021518 |
| 957 | 0/011061816 | 0/015664085 | 0/019360797 | **1957** | 0/002564 | 0/016348 | 0/021518 |
| 958 | 0/011061816 | 0/015664085 | 0/019360797 | **1958** | 0/002564 | 0/016348 | 0/021518 |
| 959 | 0/011061816 | 0/015664085 | 0/019360797 | **1959** | 0/002564 | 0/016348 | 0/021518 |
| 960 | 0/011061816 | 0/015664085 | 0/019360797 | **1960** | 0/002564 | 0/016348 | 0/021518 |
| 961 | 0/011061816 | 0/015664085 | 0/019360797 | **1961** | 0/002564 | 0/016348 | 0/021518 |
| 962 | 0/011061816 | 0/015664085 | 0/019360797 | **1962** | 0/002564 | 0/016348 | 0/021518 |
| 963 | 0/011061816 | 0/015664085 | 0/019360797 | **1963** | 0/002564 | 0/016348 | 0/021518 |
| 964 | 0/011061816 | 0/015664085 | 0/019360797 | **1964** | 0/002564 | 0/016348 | 0/021518 |
| 965 | 0/011061816 | 0/015664085 | 0/019360797 | **1965** | 0/002564 | 0/016348 | 0/021518 |
| 966 | 0/011061816 | 0/015664085 | 0/019360797 | **1966** | 0/002564 | 0/016348 | 0/021518 |
| 967 | 0/011061816 | 0/015664085 | 0/019360797 | **1967** | 0/002564 | 0/016348 | 0/021518 |
| 968 | 0/011061816 | 0/015664085 | 0/019360797 | **1968** | 0/002564 | 0/016348 | 0/021518 |
| 969 | 0/011061816 | 0/015664085 | 0/019360797 | **1969** | 0/002564 | 0/016348 | 0/021518 |
| 970 | 0/011061816 | 0/015664085 | 0/019360797 | **1970** | 0/002564 | 0/016348 | 0/021518 |
| 971 | 0/011061816 | 0/015664085 | 0/019360797 | **1971** | 0/002564 | 0/016348 | 0/021518 |
| 972 | 0/011061816 | 0/015664085 | 0/019360797 | **1972** | 0/002564 | 0/016348 | 0/021518 |
| 973 | 0/011061816 | 0/015664085 | 0/019360797 | **1973** | 0/002564 | 0/016348 | 0/021518 |
| 974 | 0/011061816 | 0/015664085 | 0/019360797 | **1974** | 0/002564 | 0/016348 | 0/021518 |
| 975 | 0/011061816 | 0/015664085 | 0/019360797 | **1975** | 0/002564 | 0/016348 | 0/021518 |
| 976 | 0/011061816 | 0/015664085 | 0/019360797 | **1976** | 0/002564 | 0/016348 | 0/021518 |
| 977 | 0/011061816 | 0/015664085 | 0/019360797 | **1977** | 0/002564 | 0/016348 | 0/021518 |
| 978 | 0/011061816 | 0/015664085 | 0/019360797 | **1978** | 0/002564 | 0/016348 | 0/021518 |
| 979 | 0/011061816 | 0/015664085 | 0/019360797 | **1979** | 0/002564 | 0/016348 | 0/021518 |
| 980 | 0/011061816 | 0/015664085 | 0/019360797 | **1980** | 0/002564 | 0/016348 | 0/021518 |
| 981 | 0/011061816 | 0/015664085 | 0/019360797 | **1981** | 0/002564 | 0/016348 | 0/021518 |
| 982 | 0/011061816 | 0/015664085 | 0/019360797 | **1982** | 0/002564 | 0/016348 | 0/021518 |
| 983 | 0/011061816 | 0/015664085 | 0/019360797 | **1983** | 0/002564 | 0/016348 | 0/021518 |
| 984 | 0/011061816 | 0/015664085 | 0/019360797 | **1984** | 0/002564 | 0/016348 | 0/021518 |
| 985 | 0/011061816 | 0/015664085 | 0/019360797 | **1985** | 0/002564 | 0/016348 | 0/021518 |
| 986 | 0/011061816 | 0/015664085 | 0/019360797 | **1986** | 0/002564 | 0/016348 | 0/021518 |
| 987 | 0/011061816 | 0/015664085 | 0/019360797 | **1987** | 0/002564 | 0/016348 | 0/021518 |
| 988 | 0/011061816 | 0/015664085 | 0/019360797 | **1988** | 0/002564 | 0/016348 | 0/021518 |
| 989 | 0/011061816 | 0/015664085 | 0/019360797 | **1989** | 0/002564 | 0/016348 | 0/021518 |
| 990 | 0/011061816 | 0/015664085 | 0/019360797 | **1990** | 0/002564 | 0/016348 | 0/021518 |
| 991 | 0/011061816 | 0/015664085 | 0/019360797 | **1991** | 0/002564 | 0/016348 | 0/021518 |
| 992 | 0/011061816 | 0/015664085 | 0/019360797 | **1992** | 0/002564 | 0/016348 | 0/021518 |
| 993 | 0/011061816 | 0/015664085 | 0/019360797 | **1993** | 0/002564 | 0/016348 | 0/021518 |
| 994 | 0/011061816 | 0/015664085 | 0/019360797 | **1994** | 0/002564 | 0/016348 | 0/021518 |
| 995 | 0/011061816 | 0/015664085 | 0/019360797 | **1995** | 0/002564 | 0/016348 | 0/021518 |
| 996 | 0/011061816 | 0/015664085 | 0/019360797 | **1996** | 0/002564 | 0/016348 | 0/021518 |
| 997 | 0/011061816 | 0/015664085 | 0/019360797 | **1997** | 0/002564 | 0/016348 | 0/021518 |
| 998 | 0/011061816 | 0/015664085 | 0/019360797 | **1998** | 0/002564 | 0/016348 | 0/021518 |
| 999 | 0/011061816 | 0/015664085 | 0/019360797 | **1999** | 0/002564 | 0/016348 | 0/021518 |
| 1000 | 0/011061816 | 0/015664085 | 0/019360797 | **2000** | 0/002564 | 0/016348 | 0/021518 |

Table 15. Cost function convergence for Damage Scenario 1 under varying noise levels - WOA.

| Iterations | 0% Noise | 3% Noise | 10% Noise | Iterations | 0% Noise | 3% Noise | 10% Noise |
| --- | --- | --- | --- | --- | --- | --- | --- |
| 1 | 0/307456822 | 0/265294532 | 0/247810351 | **1001** | 0/000984282 | 0/009966809 | 0/049119162 |
| 2 | 0/24696675 | 0/204997344 | 0/167358299 | **1002** | 0/000984282 | 0/009966809 | 0/049119162 |
| 3 | 0/239440019 | 0/140384484 | 0/107651148 | **1003** | 0/000984282 | 0/009966809 | 0/049119162 |
| 4 | 0/219379002 | 0/093945012 | 0/107651148 | **1004** | 0/000984282 | 0/009966809 | 0/049119162 |
| 5 | 0/17599804 | 0/093405507 | 0/091518747 | **1005** | 0/000984282 | 0/009966809 | 0/049119162 |
| 6 | 0/168332962 | 0/064238385 | 0/078189369 | **1006** | 0/000984282 | 0/009966809 | 0/049119162 |
| 7 | 0/124479004 | 0/049580706 | 0/064221364 | **1007** | 0/000984282 | 0/009966809 | 0/049119162 |
| 8 | 0/115664734 | 0/040598114 | 0/064221364 | **1008** | 0/000984282 | 0/009966809 | 0/049119162 |
| 9 | 0/093636816 | 0/031909631 | 0/064221364 | **1009** | 0/000984282 | 0/009966809 | 0/049119162 |
| 10 | 0/076746994 | 0/02295318 | 0/064221364 | **1010** | 0/000984282 | 0/009966809 | 0/049119162 |
| 11 | 0/048900037 | 0/02295318 | 0/064221364 | **1011** | 0/000984282 | 0/009966809 | 0/049119162 |
| 12 | 0/04551829 | 0/021901644 | 0/064221364 | **1012** | 0/000984282 | 0/009966809 | 0/049119162 |
| 13 | 0/03804485 | 0/019504652 | 0/062684051 | **1013** | 0/000984282 | 0/009773483 | 0/048885934 |
| 14 | 0/034763324 | 0/019504652 | 0/062684051 | **1014** | 0/000984282 | 0/009773483 | 0/048885934 |
| 15 | 0/034763324 | 0/019504652 | 0/062684051 | **1015** | 0/000984282 | 0/009773483 | 0/048885934 |
| 16 | 0/031312445 | 0/019504652 | 0/062684051 | **1016** | 0/000984282 | 0/009773483 | 0/048885934 |
| 17 | 0/03038583 | 0/01882019 | 0/062684051 | **1017** | 0/000984282 | 0/009773483 | 0/048885934 |
| 18 | 0/03038583 | 0/01882019 | 0/062684051 | **1018** | 0/000984282 | 0/009773483 | 0/048885934 |
| 19 | 0/03038583 | 0/017426714 | 0/062684051 | **1019** | 0/000984282 | 0/009773483 | 0/048885934 |
| 20 | 0/03038583 | 0/017426123 | 0/062684051 | **1020** | 0/000984282 | 0/009773483 | 0/048885934 |
| 21 | 0/027564689 | 0/017426123 | 0/058157948 | **1021** | 0/000984282 | 0/00929814 | 0/048885934 |
| 22 | 0/022385296 | 0/017426123 | 0/058157948 | **1022** | 0/000984282 | 0/00929814 | 0/048885934 |
| 23 | 0/022385296 | 0/017426123 | 0/058157948 | **1023** | 0/000984282 | 0/00929814 | 0/048885934 |
| 24 | 0/021998854 | 0/017426123 | 0/058157948 | **1024** | 0/000984282 | 0/00929814 | 0/048885934 |
| 25 | 0/021998854 | 0/017426123 | 0/058157948 | **1025** | 0/000984282 | 0/00929814 | 0/048885934 |
| 26 | 0/018477554 | 0/017426123 | 0/058157948 | **1026** | 0/000984282 | 0/00929814 | 0/048885934 |
| 27 | 0/017253621 | 0/017426123 | 0/054877252 | **1027** | 0/000984282 | 0/00929814 | 0/048885934 |
| 28 | 0/017253621 | 0/017426123 | 0/054877252 | **1028** | 0/000984282 | 0/00929814 | 0/048885934 |
| 29 | 0/016467544 | 0/017426123 | 0/054877252 | **1029** | 0/000984282 | 0/00929814 | 0/048885934 |
| 30 | 0/016467544 | 0/016959395 | 0/054877252 | **1030** | 0/000984282 | 0/00929814 | 0/048885934 |
| 31 | 0/013339922 | 0/016959395 | 0/054877252 | **1031** | 0/000984282 | 0/00929814 | 0/048885934 |
| 32 | 0/013339922 | 0/016959395 | 0/054877252 | **1032** | 0/000984282 | 0/00929814 | 0/048885934 |
| 33 | 0/013339922 | 0/016959395 | 0/054877252 | **1033** | 0/000984282 | 0/00929814 | 0/048885934 |
| 34 | 0/013339922 | 0/016959395 | 0/054877252 | **1034** | 0/000984282 | 0/00929814 | 0/048885934 |
| 35 | 0/009218358 | 0/016959395 | 0/054877252 | **1035** | 0/000984282 | 0/00929814 | 0/048885934 |
| 36 | 0/009218358 | 0/016959395 | 0/054877252 | **1036** | 0/000984282 | 0/00929814 | 0/048708136 |
| 37 | 0/009218358 | 0/016959395 | 0/054877252 | **1037** | 0/000984282 | 0/00929814 | 0/048708136 |
| 38 | 0/009218358 | 0/016959395 | 0/054877252 | **1038** | 0/000984282 | 0/00929814 | 0/048708136 |
| 39 | 0/009218358 | 0/016959395 | 0/054877252 | **1039** | 0/000984282 | 0/00929814 | 0/048708136 |
| 40 | 0/009218358 | 0/016959395 | 0/054877252 | **1040** | 0/000984282 | 0/00929814 | 0/048708136 |
| 41 | 0/009218358 | 0/016803555 | 0/054877252 | **1041** | 0/000984282 | 0/00929814 | 0/048708136 |
| 42 | 0/00880773 | 0/016803555 | 0/054877252 | **1042** | 0/000984282 | 0/00929814 | 0/048708136 |
| 43 | 0/00880773 | 0/016803555 | 0/054877252 | **1043** | 0/000984282 | 0/00929814 | 0/048708136 |
| 44 | 0/00880773 | 0/016803555 | 0/054877252 | **1044** | 0/000984282 | 0/00929814 | 0/048708136 |
| 45 | 0/00880773 | 0/016803555 | 0/054877252 | **1045** | 0/000984282 | 0/00929814 | 0/048708136 |
| 46 | 0/00880773 | 0/016803555 | 0/054877252 | **1046** | 0/000984282 | 0/00929814 | 0/048708136 |
| 47 | 0/00880773 | 0/016803555 | 0/054877252 | **1047** | 0/000984282 | 0/00929814 | 0/048708136 |
| 48 | 0/00880773 | 0/016803555 | 0/054877252 | **1048** | 0/000984282 | 0/00929814 | 0/048708136 |
| 49 | 0/00880773 | 0/016803555 | 0/054877252 | **1049** | 0/000984282 | 0/00929814 | 0/048708136 |
| 50 | 0/00880773 | 0/016563196 | 0/054877252 | **1050** | 0/000984282 | 0/00929814 | 0/048708136 |
| 51 | 0/00880773 | 0/016563196 | 0/054877252 | **1051** | 0/000984282 | 0/00929814 | 0/048708136 |
| 52 | 0/00880773 | 0/016563196 | 0/054877252 | **1052** | 0/000984282 | 0/00929814 | 0/048708136 |
| 53 | 0/007693995 | 0/016563196 | 0/054877252 | **1053** | 0/000984282 | 0/00929814 | 0/048708136 |
| 54 | 0/007693995 | 0/016563196 | 0/054877252 | **1054** | 0/000984282 | 0/00929814 | 0/048708136 |
| 55 | 0/007693995 | 0/016563196 | 0/054877252 | **1055** | 0/000984282 | 0/00929814 | 0/048708136 |
| 56 | 0/007693995 | 0/016563196 | 0/054877252 | **1056** | 0/000984282 | 0/00929814 | 0/048708136 |
| 57 | 0/007693995 | 0/016563196 | 0/054877252 | **1057** | 0/000984282 | 0/00929814 | 0/048708136 |
| 58 | 0/007693995 | 0/016563196 | 0/054877252 | **1058** | 0/000984282 | 0/00929814 | 0/048708136 |
| 59 | 0/007693995 | 0/016563196 | 0/054877252 | **1059** | 0/000984282 | 0/00929814 | 0/048708136 |
| 60 | 0/007693995 | 0/016563196 | 0/054877252 | **1060** | 0/000984282 | 0/00929814 | 0/048708136 |
| 61 | 0/007693995 | 0/016563196 | 0/054877252 | **1061** | 0/000984282 | 0/00929814 | 0/048708136 |
| 62 | 0/007693995 | 0/016563196 | 0/054877252 | **1062** | 0/000984282 | 0/00929814 | 0/048708136 |
| 63 | 0/007693995 | 0/016563196 | 0/054877252 | **1063** | 0/000984282 | 0/00929814 | 0/048708136 |
| 64 | 0/007693995 | 0/016563196 | 0/054877252 | **1064** | 0/000984282 | 0/00929814 | 0/048708136 |
| 65 | 0/007693995 | 0/016563196 | 0/054877252 | **1065** | 0/000984282 | 0/00929814 | 0/048708136 |
| 66 | 0/007693995 | 0/016563196 | 0/054877252 | **1066** | 0/000984282 | 0/00929814 | 0/048708136 |
| 67 | 0/007693995 | 0/016563196 | 0/054877252 | **1067** | 0/000984282 | 0/00929814 | 0/0485474 |
| 68 | 0/007693995 | 0/016563196 | 0/054877252 | **1068** | 0/000984282 | 0/00929814 | 0/0485474 |
| 69 | 0/007693995 | 0/016563196 | 0/054877252 | **1069** | 0/000932377 | 0/00929814 | 0/0485474 |
| 70 | 0/007693995 | 0/016563196 | 0/054877252 | **1070** | 0/000932377 | 0/00929814 | 0/0485474 |
| 71 | 0/007693995 | 0/016563196 | 0/054877252 | **1071** | 0/000932377 | 0/00929814 | 0/0485474 |
| 72 | 0/007693995 | 0/016563196 | 0/054877252 | **1072** | 0/000932377 | 0/00929814 | 0/0485474 |
| 73 | 0/007693995 | 0/016563196 | 0/054877252 | **1073** | 0/000932377 | 0/00929814 | 0/0485474 |
| 74 | 0/007693995 | 0/016563196 | 0/054877252 | **1074** | 0/000932377 | 0/00929814 | 0/0485474 |
| 75 | 0/006917935 | 0/016563196 | 0/054877252 | **1075** | 0/000932377 | 0/00929814 | 0/0485474 |
| 76 | 0/006917935 | 0/016563196 | 0/054877252 | **1076** | 0/000932377 | 0/00929814 | 0/0485474 |
| 77 | 0/006917935 | 0/016563196 | 0/054877252 | **1077** | 0/000932377 | 0/00929814 | 0/0485474 |
| 78 | 0/006917935 | 0/016076433 | 0/054877252 | **1078** | 0/000932377 | 0/00929814 | 0/0485474 |
| 79 | 0/006917935 | 0/016076433 | 0/054877252 | **1079** | 0/000932377 | 0/00929814 | 0/0485474 |
| 80 | 0/006917935 | 0/016076433 | 0/054877252 | **1080** | 0/000932377 | 0/00929814 | 0/0485474 |
| 81 | 0/005137741 | 0/016076433 | 0/054877252 | **1081** | 0/000932377 | 0/00929814 | 0/0485474 |
| 82 | 0/005137741 | 0/016076433 | 0/054877252 | **1082** | 0/000932377 | 0/00929814 | 0/0485474 |
| 83 | 0/005137741 | 0/015615162 | 0/054877252 | **1083** | 0/000932377 | 0/00929814 | 0/0485474 |
| 84 | 0/005137741 | 0/015615162 | 0/054877252 | **1084** | 0/000932377 | 0/00929814 | 0/0485474 |
| 85 | 0/005137741 | 0/01515896 | 0/054877252 | **1085** | 0/000932377 | 0/00929814 | 0/0485474 |
| 86 | 0/005137741 | 0/01515896 | 0/054877252 | **1086** | 0/000932377 | 0/00929814 | 0/0485474 |
| 87 | 0/004990634 | 0/01515896 | 0/054877252 | **1087** | 0/000932377 | 0/00929814 | 0/0485474 |
| 88 | 0/004990634 | 0/01515896 | 0/054877252 | **1088** | 0/000932377 | 0/00929814 | 0/0485474 |
| 89 | 0/004990634 | 0/01515896 | 0/054877252 | **1089** | 0/000932377 | 0/00929814 | 0/0485474 |
| 90 | 0/004990634 | 0/01515896 | 0/054877252 | **1090** | 0/000932377 | 0/00929814 | 0/0485474 |
| 91 | 0/004990634 | 0/01515896 | 0/054877252 | **1091** | 0/000932377 | 0/00929814 | 0/0485474 |
| 92 | 0/004990634 | 0/01515896 | 0/054877252 | **1092** | 0/000932377 | 0/00929814 | 0/0485474 |
| 93 | 0/00476237 | 0/01515896 | 0/054877252 | **1093** | 0/000932377 | 0/00929814 | 0/0485474 |
| 94 | 0/00476237 | 0/01515896 | 0/054877252 | **1094** | 0/000932377 | 0/00929814 | 0/0485474 |
| 95 | 0/00476237 | 0/01515896 | 0/054877252 | **1095** | 0/000932377 | 0/00929814 | 0/0485474 |
| 96 | 0/00476237 | 0/014958393 | 0/054877252 | **1096** | 0/000932377 | 0/00929814 | 0/0485474 |
| 97 | 0/00476237 | 0/014958393 | 0/054877252 | **1097** | 0/000932377 | 0/00929814 | 0/0485474 |
| 98 | 0/00476237 | 0/014958393 | 0/054877252 | **1098** | 0/000932377 | 0/00929814 | 0/0485474 |
| 99 | 0/00476237 | 0/014958393 | 0/054877252 | **1099** | 0/000932377 | 0/00929814 | 0/0485474 |
| 100 | 0/00476237 | 0/014958393 | 0/054877252 | **1100** | 0/000932377 | 0/00929814 | 0/0485474 |
| 101 | 0/00476237 | 0/014958393 | 0/054877252 | **1101** | 0/000932377 | 0/00929814 | 0/0485474 |
| 102 | 0/00476237 | 0/014958393 | 0/054877252 | **1102** | 0/000932377 | 0/00929814 | 0/0485474 |
| 103 | 0/00476237 | 0/014958393 | 0/054877252 | **1103** | 0/000932377 | 0/00929814 | 0/0485474 |
| 104 | 0/00447461 | 0/014244672 | 0/054877252 | **1104** | 0/000932377 | 0/00929814 | 0/0485474 |
| 105 | 0/00447461 | 0/014244672 | 0/054877252 | **1105** | 0/000932377 | 0/00929814 | 0/0485474 |
| 106 | 0/00447461 | 0/014244672 | 0/054877252 | **1106** | 0/000932377 | 0/00929814 | 0/0485474 |
| 107 | 0/00447461 | 0/014244672 | 0/054877252 | **1107** | 0/000932377 | 0/00929814 | 0/0485474 |
| 108 | 0/00447461 | 0/014244672 | 0/054877252 | **1108** | 0/000932377 | 0/00929814 | 0/0485474 |
| 109 | 0/00447461 | 0/014244672 | 0/054877252 | **1109** | 0/000932377 | 0/00929814 | 0/0485474 |
| 110 | 0/00447461 | 0/014244672 | 0/054877252 | **1110** | 0/000932377 | 0/00929814 | 0/0485474 |
| 111 | 0/00447461 | 0/014244672 | 0/054877252 | **1111** | 0/000932377 | 0/00929814 | 0/0485474 |
| 112 | 0/00447461 | 0/014244672 | 0/054877252 | **1112** | 0/000932377 | 0/00929814 | 0/0485474 |
| 113 | 0/00447461 | 0/014047891 | 0/054877252 | **1113** | 0/000932377 | 0/00929814 | 0/0485474 |
| 114 | 0/00447461 | 0/01352672 | 0/054877252 | **1114** | 0/000932377 | 0/00929814 | 0/0485474 |
| 115 | 0/00447461 | 0/01352672 | 0/054877252 | **1115** | 0/000932377 | 0/00929814 | 0/0485474 |
| 116 | 0/00447461 | 0/01352672 | 0/054877252 | **1116** | 0/000932377 | 0/00929814 | 0/0485474 |
| 117 | 0/00447461 | 0/01352672 | 0/054877252 | **1117** | 0/000932377 | 0/00929814 | 0/0485474 |
| 118 | 0/00447461 | 0/01352672 | 0/054877252 | **1118** | 0/000932377 | 0/00929814 | 0/0485474 |
| 119 | 0/00447461 | 0/01352672 | 0/054877252 | **1119** | 0/000932377 | 0/00929814 | 0/0485474 |
| 120 | 0/00447461 | 0/01352672 | 0/054877252 | **1120** | 0/000932377 | 0/00929814 | 0/0485474 |
| 121 | 0/00447461 | 0/01352672 | 0/054877252 | **1121** | 0/000932377 | 0/00929814 | 0/0485474 |
| 122 | 0/00447461 | 0/01352672 | 0/054877252 | **1122** | 0/000932377 | 0/00929814 | 0/0485474 |
| 123 | 0/00447461 | 0/012048223 | 0/054877252 | **1123** | 0/000932377 | 0/00929814 | 0/0485474 |
| 124 | 0/004245627 | 0/012048223 | 0/054877252 | **1124** | 0/000932377 | 0/00929814 | 0/0485474 |
| 125 | 0/004245627 | 0/012048223 | 0/054877252 | **1125** | 0/000932377 | 0/00929814 | 0/0485474 |
| 126 | 0/004245627 | 0/012048223 | 0/054877252 | **1126** | 0/000932377 | 0/00929814 | 0/0485474 |
| 127 | 0/004245627 | 0/012048223 | 0/054877252 | **1127** | 0/000932377 | 0/00929814 | 0/0485474 |
| 128 | 0/004245627 | 0/012048223 | 0/054877252 | **1128** | 0/000932377 | 0/00929814 | 0/0485474 |
| 129 | 0/004245627 | 0/012048223 | 0/054877252 | **1129** | 0/000932377 | 0/00929814 | 0/0485474 |
| 130 | 0/004245627 | 0/012048223 | 0/054877252 | **1130** | 0/000932377 | 0/00929814 | 0/0485474 |
| 131 | 0/004245627 | 0/012048223 | 0/054877252 | **1131** | 0/000932377 | 0/00929814 | 0/0485474 |
| 132 | 0/004245627 | 0/012048223 | 0/054877252 | **1132** | 0/000932377 | 0/00929814 | 0/0485474 |
| 133 | 0/004245627 | 0/012048223 | 0/054877252 | **1133** | 0/000932377 | 0/00929814 | 0/0485474 |
| 134 | 0/004245627 | 0/012048223 | 0/054877252 | **1134** | 0/000932377 | 0/00929814 | 0/0485474 |
| 135 | 0/004245627 | 0/012048223 | 0/054877252 | **1135** | 0/000932377 | 0/00929814 | 0/0485474 |
| 136 | 0/004245627 | 0/012048223 | 0/054877252 | **1136** | 0/000932377 | 0/00929814 | 0/0485474 |
| 137 | 0/004245627 | 0/012048223 | 0/054877252 | **1137** | 0/000932377 | 0/00929814 | 0/0485474 |
| 138 | 0/004245627 | 0/012048223 | 0/054877252 | **1138** | 0/000932377 | 0/00929814 | 0/0485474 |
| 139 | 0/004245627 | 0/012048223 | 0/054877252 | **1139** | 0/000932377 | 0/00929814 | 0/0485474 |
| 140 | 0/004245627 | 0/012048223 | 0/054877252 | **1140** | 0/000932377 | 0/00929814 | 0/0485474 |
| 141 | 0/004245627 | 0/012048223 | 0/054877252 | **1141** | 0/000932377 | 0/00929814 | 0/0485474 |
| 142 | 0/004245627 | 0/012048223 | 0/054877252 | **1142** | 0/000932377 | 0/00929814 | 0/0485474 |
| 143 | 0/004245627 | 0/012048223 | 0/054877252 | **1143** | 0/000932377 | 0/00929814 | 0/0485474 |
| 144 | 0/004245627 | 0/012048223 | 0/054877252 | **1144** | 0/000932377 | 0/00929814 | 0/0485474 |
| 145 | 0/004245627 | 0/011101385 | 0/054877252 | **1145** | 0/000932377 | 0/00929814 | 0/0485474 |
| 146 | 0/004245627 | 0/011101385 | 0/054877252 | **1146** | 0/000932377 | 0/00929814 | 0/0485474 |
| 147 | 0/004245627 | 0/011101385 | 0/054877252 | **1147** | 0/000932377 | 0/00929814 | 0/0485474 |
| 148 | 0/004245627 | 0/011101385 | 0/054877252 | **1148** | 0/000932377 | 0/00929814 | 0/0485474 |
| 149 | 0/004245627 | 0/011101385 | 0/054877252 | **1149** | 0/000932377 | 0/00929814 | 0/0485474 |
| 150 | 0/004245627 | 0/011101385 | 0/054877252 | **1150** | 0/000932377 | 0/00929814 | 0/0485474 |
| 151 | 0/004245627 | 0/011101385 | 0/054877252 | **1151** | 0/000932377 | 0/00929814 | 0/0485474 |
| 152 | 0/004245627 | 0/011101385 | 0/054877252 | **1152** | 0/000932377 | 0/00929814 | 0/0485474 |
| 153 | 0/004245627 | 0/011101385 | 0/054877252 | **1153** | 0/000932377 | 0/00929814 | 0/0485474 |
| 154 | 0/004245627 | 0/011101385 | 0/054877252 | **1154** | 0/000932377 | 0/00929814 | 0/0485474 |
| 155 | 0/004245627 | 0/011101385 | 0/054877252 | **1155** | 0/000932377 | 0/00929814 | 0/0485474 |
| 156 | 0/004245627 | 0/011101385 | 0/054877252 | **1156** | 0/000932377 | 0/00929814 | 0/0485474 |
| 157 | 0/004245627 | 0/011101385 | 0/054877252 | **1157** | 0/000932377 | 0/00929814 | 0/0485474 |
| 158 | 0/004245627 | 0/011101385 | 0/054877252 | **1158** | 0/000932377 | 0/00929814 | 0/0485474 |
| 159 | 0/004245627 | 0/011101385 | 0/054877252 | **1159** | 0/000932377 | 0/00929814 | 0/0485474 |
| 160 | 0/004245627 | 0/011101385 | 0/054877252 | **1160** | 0/000932377 | 0/00929814 | 0/0485474 |
| 161 | 0/004245627 | 0/011101385 | 0/054877252 | **1161** | 0/000932377 | 0/00929814 | 0/0485474 |
| 162 | 0/004245627 | 0/011101385 | 0/054877252 | **1162** | 0/000932377 | 0/00929814 | 0/0485474 |
| 163 | 0/003879653 | 0/011101385 | 0/054877252 | **1163** | 0/000932377 | 0/00929814 | 0/0485474 |
| 164 | 0/003879653 | 0/011101385 | 0/054877252 | **1164** | 0/000932377 | 0/00929814 | 0/0485474 |
| 165 | 0/003879653 | 0/011101385 | 0/054877252 | **1165** | 0/000932377 | 0/00929814 | 0/0485474 |
| 166 | 0/003879653 | 0/011101385 | 0/054877252 | **1166** | 0/000932377 | 0/00929814 | 0/0485474 |
| 167 | 0/003879653 | 0/011101385 | 0/054122585 | **1167** | 0/000932377 | 0/00929814 | 0/0485474 |
| 168 | 0/003879653 | 0/011101385 | 0/054122585 | **1168** | 0/000932377 | 0/00929814 | 0/0485474 |
| 169 | 0/003879653 | 0/011101385 | 0/054122585 | **1169** | 0/000932377 | 0/00929814 | 0/0485474 |
| 170 | 0/003879653 | 0/011101385 | 0/054122585 | **1170** | 0/000932377 | 0/00929814 | 0/0485474 |
| 171 | 0/003879653 | 0/011101385 | 0/054122585 | **1171** | 0/000932377 | 0/00929814 | 0/0485474 |
| 172 | 0/003879653 | 0/011101385 | 0/054122585 | **1172** | 0/000932377 | 0/00929814 | 0/0485474 |
| 173 | 0/003879653 | 0/011101385 | 0/054122585 | **1173** | 0/000932377 | 0/00929814 | 0/0485474 |
| 174 | 0/003879653 | 0/011101385 | 0/054122585 | **1174** | 0/000932377 | 0/00929814 | 0/0485474 |
| 175 | 0/003879653 | 0/011101385 | 0/054122585 | **1175** | 0/000932377 | 0/00929814 | 0/0485474 |
| 176 | 0/003879653 | 0/011101385 | 0/054122585 | **1176** | 0/000932377 | 0/00929814 | 0/0485474 |
| 177 | 0/003879653 | 0/011101385 | 0/054122585 | **1177** | 0/000932377 | 0/00929814 | 0/0485474 |
| 178 | 0/003879653 | 0/011101385 | 0/054122585 | **1178** | 0/000932377 | 0/00929814 | 0/0485474 |
| 179 | 0/003879653 | 0/011101385 | 0/054122585 | **1179** | 0/000932377 | 0/00929814 | 0/0485474 |
| 180 | 0/003879653 | 0/011101385 | 0/054122585 | **1180** | 0/000932377 | 0/00929814 | 0/0485474 |
| 181 | 0/003879653 | 0/011101385 | 0/054122585 | **1181** | 0/000932377 | 0/00929814 | 0/0485474 |
| 182 | 0/003879653 | 0/011101385 | 0/054122585 | **1182** | 0/000932377 | 0/00929814 | 0/0485474 |
| 183 | 0/003879653 | 0/011101385 | 0/054122585 | **1183** | 0/000932377 | 0/00929814 | 0/0485474 |
| 184 | 0/003879653 | 0/011101385 | 0/054122585 | **1184** | 0/000932377 | 0/00929814 | 0/0485474 |
| 185 | 0/003879653 | 0/011101385 | 0/054122585 | **1185** | 0/000932377 | 0/00929814 | 0/0485474 |
| 186 | 0/003879653 | 0/011101385 | 0/054122585 | **1186** | 0/000932377 | 0/00929814 | 0/0485474 |
| 187 | 0/003879653 | 0/011101385 | 0/054122585 | **1187** | 0/000932377 | 0/00929814 | 0/0485474 |
| 188 | 0/003879653 | 0/011101385 | 0/054122585 | **1188** | 0/000932377 | 0/00929814 | 0/0485474 |
| 189 | 0/003879653 | 0/011101385 | 0/054122585 | **1189** | 0/000932377 | 0/00929814 | 0/0485474 |
| 190 | 0/003879653 | 0/011101385 | 0/054122585 | **1190** | 0/000932377 | 0/00929814 | 0/0485474 |
| 191 | 0/003879653 | 0/011101385 | 0/052038148 | **1191** | 0/000932377 | 0/00929814 | 0/0485474 |
| 192 | 0/003879653 | 0/011101385 | 0/052038148 | **1192** | 0/000932377 | 0/00929814 | 0/048393095 |
| 193 | 0/003879653 | 0/011101385 | 0/052038148 | **1193** | 0/000932377 | 0/00929814 | 0/048393095 |
| 194 | 0/003879653 | 0/011101385 | 0/052038148 | **1194** | 0/000932377 | 0/00929814 | 0/048393095 |
| 195 | 0/003879653 | 0/011101385 | 0/052038148 | **1195** | 0/000932377 | 0/00929814 | 0/048393095 |
| 196 | 0/003879653 | 0/011101385 | 0/052038148 | **1196** | 0/000932377 | 0/00929814 | 0/048393095 |
| 197 | 0/003879653 | 0/011101385 | 0/052038148 | **1197** | 0/000932377 | 0/00929814 | 0/048393095 |
| 198 | 0/003879653 | 0/011101385 | 0/052038148 | **1198** | 0/000932377 | 0/00929814 | 0/048393095 |
| 199 | 0/003879653 | 0/011101385 | 0/052038148 | **1199** | 0/000932377 | 0/00929814 | 0/048393095 |
| 200 | 0/003879653 | 0/011101385 | 0/052038148 | **1200** | 0/000932377 | 0/00929814 | 0/048393095 |
| 201 | 0/003879653 | 0/011101385 | 0/052038148 | **1201** | 0/000932377 | 0/00929814 | 0/048393095 |
| 202 | 0/003879653 | 0/011101385 | 0/052038148 | **1202** | 0/000932377 | 0/00929814 | 0/048393095 |
| 203 | 0/003879653 | 0/011101385 | 0/052038148 | **1203** | 0/000932377 | 0/00929814 | 0/048393095 |
| 204 | 0/003879653 | 0/011101385 | 0/052038148 | **1204** | 0/000932377 | 0/00929814 | 0/048393095 |
| 205 | 0/003879653 | 0/011101385 | 0/052038148 | **1205** | 0/000932377 | 0/00929814 | 0/048393095 |
| 206 | 0/003879653 | 0/011101385 | 0/052038148 | **1206** | 0/000932377 | 0/00929814 | 0/048393095 |
| 207 | 0/003879653 | 0/011101385 | 0/052038148 | **1207** | 0/000932377 | 0/00929814 | 0/048393095 |
| 208 | 0/003879653 | 0/011101385 | 0/052038148 | **1208** | 0/000932377 | 0/00929814 | 0/048160932 |
| 209 | 0/003879653 | 0/011101385 | 0/052038148 | **1209** | 0/000932377 | 0/00929814 | 0/048160932 |
| 210 | 0/003879653 | 0/011101385 | 0/052038148 | **1210** | 0/000932377 | 0/00929814 | 0/048160932 |
| 211 | 0/003879653 | 0/011101385 | 0/052038148 | **1211** | 0/000932377 | 0/00929814 | 0/048160932 |
| 212 | 0/003879653 | 0/011101385 | 0/052038148 | **1212** | 0/000932377 | 0/00929814 | 0/048160932 |
| 213 | 0/003879653 | 0/011101385 | 0/052038148 | **1213** | 0/000932377 | 0/00929814 | 0/048160932 |
| 214 | 0/003879653 | 0/011101385 | 0/052038148 | **1214** | 0/000932377 | 0/00929814 | 0/047863268 |
| 215 | 0/003879653 | 0/011101385 | 0/052038148 | **1215** | 0/000932377 | 0/00929814 | 0/047863268 |
| 216 | 0/003879653 | 0/011101385 | 0/052038148 | **1216** | 0/000932377 | 0/00929814 | 0/047863268 |
| 217 | 0/003879653 | 0/011101385 | 0/052038148 | **1217** | 0/000932377 | 0/00929814 | 0/047863268 |
| 218 | 0/003879653 | 0/011101385 | 0/052038148 | **1218** | 0/000932377 | 0/00929814 | 0/047863268 |
| 219 | 0/003879653 | 0/011101385 | 0/052038148 | **1219** | 0/000932377 | 0/00929814 | 0/047863268 |
| 220 | 0/003879653 | 0/011101385 | 0/052038148 | **1220** | 0/000932377 | 0/00929814 | 0/047863268 |
| 221 | 0/003879653 | 0/011101385 | 0/052038148 | **1221** | 0/000932377 | 0/00929814 | 0/047863268 |
| 222 | 0/003879653 | 0/011042176 | 0/052038148 | **1222** | 0/000932377 | 0/00929814 | 0/047863268 |
| 223 | 0/003879653 | 0/011042176 | 0/052038148 | **1223** | 0/000932377 | 0/00929814 | 0/047863268 |
| 224 | 0/003879653 | 0/011042176 | 0/052038148 | **1224** | 0/000932377 | 0/00929814 | 0/047863268 |
| 225 | 0/003879653 | 0/011042176 | 0/052038148 | **1225** | 0/000932377 | 0/00929814 | 0/047863268 |
| 226 | 0/003879653 | 0/011042176 | 0/052038148 | **1226** | 0/000932377 | 0/00929814 | 0/047863268 |
| 227 | 0/003879653 | 0/011042176 | 0/052038148 | **1227** | 0/000932377 | 0/00929814 | 0/047863268 |
| 228 | 0/003879653 | 0/011042176 | 0/052038148 | **1228** | 0/000932377 | 0/00929814 | 0/047863268 |
| 229 | 0/003879653 | 0/011042176 | 0/052038148 | **1229** | 0/000932377 | 0/00929814 | 0/047863268 |
| 230 | 0/003879653 | 0/011042176 | 0/052038148 | **1230** | 0/000932377 | 0/00929814 | 0/047863268 |
| 231 | 0/003879653 | 0/011042176 | 0/052038148 | **1231** | 0/000932377 | 0/00929814 | 0/047863268 |
| 232 | 0/003879653 | 0/011042176 | 0/052038148 | **1232** | 0/000932377 | 0/00929814 | 0/047863268 |
| 233 | 0/003879653 | 0/011042176 | 0/052038148 | **1233** | 0/000932377 | 0/00929814 | 0/047863268 |
| 234 | 0/003879653 | 0/011042176 | 0/052038148 | **1234** | 0/000932377 | 0/00929814 | 0/047863268 |
| 235 | 0/003879653 | 0/011042176 | 0/052038148 | **1235** | 0/000932377 | 0/00929814 | 0/047863268 |
| 236 | 0/003879653 | 0/011042176 | 0/052038148 | **1236** | 0/000932377 | 0/00929814 | 0/047863268 |
| 237 | 0/003879653 | 0/011042176 | 0/052038148 | **1237** | 0/000932377 | 0/00929814 | 0/047863268 |
| 238 | 0/003879653 | 0/011042176 | 0/052038148 | **1238** | 0/000932377 | 0/00929814 | 0/047863268 |
| 239 | 0/003879653 | 0/011042176 | 0/052038148 | **1239** | 0/000932377 | 0/00929814 | 0/047863268 |
| 240 | 0/003879653 | 0/011042176 | 0/052038148 | **1240** | 0/000932377 | 0/00929814 | 0/047863268 |
| 241 | 0/003879653 | 0/011042176 | 0/052038148 | **1241** | 0/000932377 | 0/00929814 | 0/047863268 |
| 242 | 0/003879653 | 0/011042176 | 0/052038148 | **1242** | 0/000932377 | 0/00929814 | 0/047863268 |
| 243 | 0/003879653 | 0/011042176 | 0/052038148 | **1243** | 0/000932377 | 0/00929814 | 0/047863268 |
| 244 | 0/003879653 | 0/011042176 | 0/052038148 | **1244** | 0/000932377 | 0/00929814 | 0/047863268 |
| 245 | 0/003879653 | 0/011042176 | 0/052038148 | **1245** | 0/000932377 | 0/00929814 | 0/047863268 |
| 246 | 0/003879653 | 0/011042176 | 0/052038148 | **1246** | 0/000932377 | 0/00929814 | 0/047863268 |
| 247 | 0/003879653 | 0/011042176 | 0/052038148 | **1247** | 0/000932377 | 0/00929814 | 0/047863268 |
| 248 | 0/003879653 | 0/011042176 | 0/052038148 | **1248** | 0/000932377 | 0/00929814 | 0/047863268 |
| 249 | 0/003879653 | 0/011042176 | 0/052038148 | **1249** | 0/000932377 | 0/00929814 | 0/047863268 |
| 250 | 0/003879653 | 0/011042176 | 0/052038148 | **1250** | 0/000932377 | 0/00929814 | 0/047863268 |
| 251 | 0/003879653 | 0/011042176 | 0/052038148 | **1251** | 0/000932377 | 0/00929814 | 0/047863268 |
| 252 | 0/003879653 | 0/011042176 | 0/052038148 | **1252** | 0/000932377 | 0/00929814 | 0/047863268 |
| 253 | 0/003879653 | 0/011042176 | 0/052038148 | **1253** | 0/000932377 | 0/00929814 | 0/047863268 |
| 254 | 0/003879653 | 0/011042176 | 0/052038148 | **1254** | 0/000872048 | 0/00929814 | 0/047863268 |
| 255 | 0/003879653 | 0/011042176 | 0/052038148 | **1255** | 0/000872048 | 0/00929814 | 0/047863268 |
| 256 | 0/003879653 | 0/011042176 | 0/052038148 | **1256** | 0/000872048 | 0/00929814 | 0/047863268 |
| 257 | 0/003879653 | 0/011042176 | 0/052038148 | **1257** | 0/000872048 | 0/00929814 | 0/047863268 |
| 258 | 0/003879653 | 0/011042176 | 0/052038148 | **1258** | 0/000872048 | 0/00929814 | 0/047863268 |
| 259 | 0/003879653 | 0/011042176 | 0/052038148 | **1259** | 0/000872048 | 0/00929814 | 0/047863268 |
| 260 | 0/003879653 | 0/011042176 | 0/052038148 | **1260** | 0/000872048 | 0/00929814 | 0/047863268 |
| 261 | 0/003879653 | 0/011042176 | 0/052038148 | **1261** | 0/000872048 | 0/00929814 | 0/047863268 |
| 262 | 0/003879653 | 0/011042176 | 0/052038148 | **1262** | 0/000872048 | 0/00929814 | 0/047863268 |
| 263 | 0/003879653 | 0/011042176 | 0/052038148 | **1263** | 0/000872048 | 0/00929814 | 0/047863268 |
| 264 | 0/003879653 | 0/011042176 | 0/052038148 | **1264** | 0/000872048 | 0/00929814 | 0/047863268 |
| 265 | 0/003879653 | 0/011042176 | 0/052038148 | **1265** | 0/000872048 | 0/00929814 | 0/047863268 |
| 266 | 0/003879653 | 0/011042176 | 0/052038148 | **1266** | 0/000872048 | 0/00929814 | 0/047863268 |
| 267 | 0/003879653 | 0/011042176 | 0/052038148 | **1267** | 0/000872048 | 0/00929814 | 0/047863268 |
| 268 | 0/003879653 | 0/011042176 | 0/052038148 | **1268** | 0/000872048 | 0/00929814 | 0/047863268 |
| 269 | 0/003879653 | 0/011042176 | 0/052038148 | **1269** | 0/000872048 | 0/00929814 | 0/047863268 |
| 270 | 0/003879653 | 0/011042176 | 0/05156373 | **1270** | 0/000872048 | 0/00929814 | 0/047863268 |
| 271 | 0/003879653 | 0/011042176 | 0/05156373 | **1271** | 0/000872048 | 0/00929814 | 0/047863268 |
| 272 | 0/003879653 | 0/011042176 | 0/05156373 | **1272** | 0/000872048 | 0/00929814 | 0/047863268 |
| 273 | 0/003879653 | 0/011042176 | 0/05156373 | **1273** | 0/000872048 | 0/00929814 | 0/047863268 |
| 274 | 0/003879653 | 0/011042176 | 0/05156373 | **1274** | 0/000872048 | 0/00929814 | 0/047863268 |
| 275 | 0/003879653 | 0/011042176 | 0/05156373 | **1275** | 0/000872048 | 0/00929814 | 0/047863268 |
| 276 | 0/003879653 | 0/011042176 | 0/05156373 | **1276** | 0/000872048 | 0/00929814 | 0/047863268 |
| 277 | 0/003879653 | 0/011042176 | 0/05156373 | **1277** | 0/000872048 | 0/00929814 | 0/047863268 |
| 278 | 0/003879653 | 0/011042176 | 0/05156373 | **1278** | 0/000872048 | 0/00929814 | 0/047863268 |
| 279 | 0/003879653 | 0/011042176 | 0/05156373 | **1279** | 0/000872048 | 0/00929814 | 0/047863268 |
| 280 | 0/003879653 | 0/011042176 | 0/05156373 | **1280** | 0/000872048 | 0/00929814 | 0/047863268 |
| 281 | 0/003879653 | 0/011042176 | 0/05156373 | **1281** | 0/000872048 | 0/00929814 | 0/047863268 |
| 282 | 0/003879653 | 0/011042176 | 0/05156373 | **1282** | 0/000872048 | 0/00929814 | 0/047863268 |
| 283 | 0/003879653 | 0/011042176 | 0/05156373 | **1283** | 0/000872048 | 0/00929814 | 0/047863268 |
| 284 | 0/003879653 | 0/011042176 | 0/05156373 | **1284** | 0/000872048 | 0/00929814 | 0/047863268 |
| 285 | 0/003879653 | 0/011042176 | 0/05156373 | **1285** | 0/000872048 | 0/00929814 | 0/047439318 |
| 286 | 0/003879653 | 0/011042176 | 0/05156373 | **1286** | 0/000872048 | 0/00929814 | 0/047439318 |
| 287 | 0/003879653 | 0/011042176 | 0/05156373 | **1287** | 0/000872048 | 0/00929814 | 0/047439318 |
| 288 | 0/003879653 | 0/010805334 | 0/05156373 | **1288** | 0/000872048 | 0/00929814 | 0/047439318 |
| 289 | 0/003879653 | 0/010805334 | 0/05156373 | **1289** | 0/000872048 | 0/00929814 | 0/047439318 |
| 290 | 0/003879653 | 0/010805334 | 0/05156373 | **1290** | 0/000872048 | 0/00929814 | 0/047439318 |
| 291 | 0/003879653 | 0/010805334 | 0/05156373 | **1291** | 0/000872048 | 0/00929814 | 0/047439318 |
| 292 | 0/003879653 | 0/010805334 | 0/05156373 | **1292** | 0/000872048 | 0/00929814 | 0/047390713 |
| 293 | 0/003879653 | 0/010805334 | 0/05156373 | **1293** | 0/000872048 | 0/00929814 | 0/047390713 |
| 294 | 0/003879653 | 0/010805334 | 0/05156373 | **1294** | 0/000872048 | 0/00929814 | 0/047390713 |
| 295 | 0/003879653 | 0/010805334 | 0/05156373 | **1295** | 0/000872048 | 0/00929814 | 0/047252058 |
| 296 | 0/003879653 | 0/010805334 | 0/05156373 | **1296** | 0/000872048 | 0/00929814 | 0/047252058 |
| 297 | 0/003879653 | 0/010805334 | 0/05156373 | **1297** | 0/000872048 | 0/00929814 | 0/047252058 |
| 298 | 0/003879653 | 0/010805334 | 0/05156373 | **1298** | 0/000872048 | 0/00929814 | 0/047252058 |
| 299 | 0/003879653 | 0/010805334 | 0/05156373 | **1299** | 0/000872048 | 0/00929814 | 0/047252058 |
| 300 | 0/003879653 | 0/010805334 | 0/05156373 | **1300** | 0/000872048 | 0/00929814 | 0/047252058 |
| 301 | 0/003879653 | 0/010805334 | 0/05156373 | **1301** | 0/000872048 | 0/00929814 | 0/047252058 |
| 302 | 0/003879653 | 0/010805334 | 0/05156373 | **1302** | 0/000872048 | 0/00929814 | 0/047252058 |
| 303 | 0/003879653 | 0/010805334 | 0/05156373 | **1303** | 0/000872048 | 0/00929814 | 0/047252058 |
| 304 | 0/003879653 | 0/010805334 | 0/05156373 | **1304** | 0/000872048 | 0/00929814 | 0/047252058 |
| 305 | 0/003879653 | 0/010805334 | 0/05156373 | **1305** | 0/000872048 | 0/00929814 | 0/047252058 |
| 306 | 0/003879653 | 0/010805334 | 0/05156373 | **1306** | 0/000872048 | 0/009214425 | 0/047252058 |
| 307 | 0/003879653 | 0/010805334 | 0/05156373 | **1307** | 0/000872048 | 0/009214425 | 0/047252058 |
| 308 | 0/003879653 | 0/010805334 | 0/05156373 | **1308** | 0/000872048 | 0/009214425 | 0/047252058 |
| 309 | 0/00374895 | 0/010805334 | 0/05156373 | **1309** | 0/000872048 | 0/009214425 | 0/047252058 |
| 310 | 0/00374895 | 0/010805334 | 0/05156373 | **1310** | 0/000872048 | 0/009214425 | 0/047252058 |
| 311 | 0/00374895 | 0/010805334 | 0/05156373 | **1311** | 0/000872048 | 0/009214425 | 0/047252058 |
| 312 | 0/00374895 | 0/010805334 | 0/05156373 | **1312** | 0/000872048 | 0/009214425 | 0/047252058 |
| 313 | 0/00374895 | 0/010805334 | 0/05156373 | **1313** | 0/000872048 | 0/009214425 | 0/047252058 |
| 314 | 0/00374895 | 0/010805334 | 0/05156373 | **1314** | 0/000872048 | 0/009214425 | 0/047252058 |
| 315 | 0/00374895 | 0/010805334 | 0/05156373 | **1315** | 0/000872048 | 0/009214425 | 0/047252058 |
| 316 | 0/00374895 | 0/010805334 | 0/05156373 | **1316** | 0/000872048 | 0/009214425 | 0/047252058 |
| 317 | 0/00374895 | 0/010805334 | 0/05156373 | **1317** | 0/000872048 | 0/009214425 | 0/047252058 |
| 318 | 0/00371145 | 0/010805334 | 0/05156373 | **1318** | 0/000872048 | 0/009214425 | 0/046728809 |
| 319 | 0/00371145 | 0/010805334 | 0/05156373 | **1319** | 0/000872048 | 0/009214425 | 0/046728809 |
| 320 | 0/00371145 | 0/010805334 | 0/05156373 | **1320** | 0/000872048 | 0/009214425 | 0/046728809 |
| 321 | 0/00371145 | 0/010805334 | 0/05156373 | **1321** | 0/000872048 | 0/009214425 | 0/046728809 |
| 322 | 0/00371145 | 0/010805334 | 0/05156373 | **1322** | 0/000872048 | 0/009214425 | 0/046728809 |
| 323 | 0/00371145 | 0/010805334 | 0/05156373 | **1323** | 0/000872048 | 0/009214425 | 0/046728809 |
| 324 | 0/00371145 | 0/010805334 | 0/05156373 | **1324** | 0/000872048 | 0/009214425 | 0/046728809 |
| 325 | 0/00371145 | 0/010805334 | 0/05156373 | **1325** | 0/000872048 | 0/009214425 | 0/046728809 |
| 326 | 0/00371145 | 0/010805334 | 0/05156373 | **1326** | 0/000872048 | 0/009214425 | 0/046728809 |
| 327 | 0/00371145 | 0/010805334 | 0/05156373 | **1327** | 0/000872048 | 0/009214425 | 0/046728809 |
| 328 | 0/00371145 | 0/010805334 | 0/05156373 | **1328** | 0/000872048 | 0/009214425 | 0/046728809 |
| 329 | 0/00371145 | 0/010805334 | 0/05156373 | **1329** | 0/000872048 | 0/009214425 | 0/046728809 |
| 330 | 0/00371145 | 0/010805334 | 0/05156373 | **1330** | 0/000872048 | 0/009214425 | 0/046728809 |
| 331 | 0/00371145 | 0/010805334 | 0/05156373 | **1331** | 0/000872048 | 0/009214425 | 0/046728809 |
| 332 | 0/00371145 | 0/010805334 | 0/05156373 | **1332** | 0/000872048 | 0/009214425 | 0/046728809 |
| 333 | 0/00371145 | 0/010805334 | 0/05156373 | **1333** | 0/000872048 | 0/009214425 | 0/046728809 |
| 334 | 0/00371145 | 0/010805334 | 0/05156373 | **1334** | 0/000872048 | 0/009214425 | 0/046728809 |
| 335 | 0/00371145 | 0/010805334 | 0/05156373 | **1335** | 0/000872048 | 0/009214425 | 0/046728809 |
| 336 | 0/00371145 | 0/010805334 | 0/05156373 | **1336** | 0/000872048 | 0/009214425 | 0/046728809 |
| 337 | 0/00371145 | 0/010805334 | 0/05156373 | **1337** | 0/000872048 | 0/009214425 | 0/046728809 |
| 338 | 0/00371145 | 0/010805334 | 0/05156373 | **1338** | 0/000872048 | 0/009214425 | 0/046728809 |
| 339 | 0/00371145 | 0/010805334 | 0/05156373 | **1339** | 0/000872048 | 0/009214425 | 0/046728809 |
| 340 | 0/00371145 | 0/010805334 | 0/05156373 | **1340** | 0/000872048 | 0/009214425 | 0/046728809 |
| 341 | 0/00371145 | 0/010805334 | 0/05156373 | **1341** | 0/000872048 | 0/009214425 | 0/046728809 |
| 342 | 0/00371145 | 0/010805334 | 0/05156373 | **1342** | 0/000872048 | 0/009214425 | 0/046728809 |
| 343 | 0/00371145 | 0/010805334 | 0/05156373 | **1343** | 0/000872048 | 0/009214425 | 0/046728809 |
| 344 | 0/00371145 | 0/010805334 | 0/05156373 | **1344** | 0/000872048 | 0/009214425 | 0/046728809 |
| 345 | 0/00371145 | 0/010805334 | 0/05156373 | **1345** | 0/000872048 | 0/009214425 | 0/046728809 |
| 346 | 0/00371145 | 0/010805334 | 0/05156373 | **1346** | 0/000861223 | 0/009214425 | 0/046728809 |
| 347 | 0/00371145 | 0/010805334 | 0/05156373 | **1347** | 0/000861223 | 0/009214425 | 0/046728809 |
| 348 | 0/00371145 | 0/010805334 | 0/05156373 | **1348** | 0/000861223 | 0/009214425 | 0/046728809 |
| 349 | 0/00371145 | 0/010805334 | 0/05156373 | **1349** | 0/000861223 | 0/009214425 | 0/046728809 |
| 350 | 0/00371145 | 0/010805334 | 0/05156373 | **1350** | 0/000861223 | 0/009214425 | 0/046728809 |
| 351 | 0/00371145 | 0/010805334 | 0/05156373 | **1351** | 0/000861223 | 0/009214425 | 0/046728809 |
| 352 | 0/00371145 | 0/010805334 | 0/05156373 | **1352** | 0/000861223 | 0/009214425 | 0/046728809 |
| 353 | 0/00371145 | 0/010805334 | 0/05156373 | **1353** | 0/000861223 | 0/009214425 | 0/046728809 |
| 354 | 0/00371145 | 0/010805334 | 0/05156373 | **1354** | 0/000861223 | 0/009214425 | 0/046728809 |
| 355 | 0/00371145 | 0/010805334 | 0/05156373 | **1355** | 0/000861223 | 0/009214425 | 0/046728809 |
| 356 | 0/00371145 | 0/010805334 | 0/05156373 | **1356** | 0/000861223 | 0/009214425 | 0/046728809 |
| 357 | 0/00371145 | 0/010805334 | 0/05156373 | **1357** | 0/000861223 | 0/009214425 | 0/046728809 |
| 358 | 0/00371145 | 0/010805334 | 0/05156373 | **1358** | 0/000861223 | 0/009214425 | 0/046728809 |
| 359 | 0/00371145 | 0/010805334 | 0/05156373 | **1359** | 0/000861223 | 0/009214425 | 0/046728809 |
| 360 | 0/002824218 | 0/010805334 | 0/05156373 | **1360** | 0/000861223 | 0/009214425 | 0/046728809 |
| 361 | 0/002824218 | 0/010805334 | 0/05156373 | **1361** | 0/000861223 | 0/009214425 | 0/046728809 |
| 362 | 0/002824218 | 0/010805334 | 0/05156373 | **1362** | 0/000861223 | 0/009214425 | 0/046728809 |
| 363 | 0/002824218 | 0/010805334 | 0/05156373 | **1363** | 0/000861223 | 0/009214425 | 0/046728809 |
| 364 | 0/002824218 | 0/010805334 | 0/05156373 | **1364** | 0/000861223 | 0/009214425 | 0/046728809 |
| 365 | 0/002824218 | 0/010805334 | 0/05156373 | **1365** | 0/000861223 | 0/009214425 | 0/046728809 |
| 366 | 0/002824218 | 0/010805334 | 0/05156373 | **1366** | 0/000861223 | 0/009214425 | 0/046728809 |
| 367 | 0/002824218 | 0/010805334 | 0/05156373 | **1367** | 0/000861223 | 0/009214425 | 0/046728809 |
| 368 | 0/002824218 | 0/010805334 | 0/05156373 | **1368** | 0/000861223 | 0/009214425 | 0/046728809 |
| 369 | 0/002824218 | 0/010805334 | 0/05156373 | **1369** | 0/000861223 | 0/009214425 | 0/046728809 |
| 370 | 0/002824218 | 0/010805334 | 0/05156373 | **1370** | 0/000861223 | 0/009214425 | 0/046728809 |
| 371 | 0/002824218 | 0/010805334 | 0/05156373 | **1371** | 0/000861223 | 0/009214425 | 0/046728809 |
| 372 | 0/002824218 | 0/010805334 | 0/05156373 | **1372** | 0/000861223 | 0/009214425 | 0/046728809 |
| 373 | 0/002824218 | 0/010805334 | 0/05156373 | **1373** | 0/000861223 | 0/009214425 | 0/046728809 |
| 374 | 0/002824218 | 0/010805334 | 0/05156373 | **1374** | 0/000861223 | 0/009214425 | 0/046728809 |
| 375 | 0/002824218 | 0/010805334 | 0/05156373 | **1375** | 0/000861223 | 0/009214425 | 0/046728809 |
| 376 | 0/002824218 | 0/010805334 | 0/05156373 | **1376** | 0/000861223 | 0/009214425 | 0/046728809 |
| 377 | 0/002824218 | 0/010805334 | 0/05156373 | **1377** | 0/000861223 | 0/009214425 | 0/046728809 |
| 378 | 0/002824218 | 0/010805334 | 0/05156373 | **1378** | 0/000861223 | 0/009214425 | 0/046728809 |
| 379 | 0/002824218 | 0/010805334 | 0/05156373 | **1379** | 0/000861223 | 0/009214425 | 0/046728809 |
| 380 | 0/002824218 | 0/010805334 | 0/05156373 | **1380** | 0/000861223 | 0/009214425 | 0/046728809 |
| 381 | 0/002824218 | 0/010805334 | 0/05156373 | **1381** | 0/000861223 | 0/009214425 | 0/046728809 |
| 382 | 0/002824218 | 0/010805334 | 0/05156373 | **1382** | 0/000861223 | 0/009214425 | 0/046728809 |
| 383 | 0/002824218 | 0/010805334 | 0/05156373 | **1383** | 0/000861223 | 0/009214425 | 0/046728809 |
| 384 | 0/002824218 | 0/010805334 | 0/05156373 | **1384** | 0/000861223 | 0/009214425 | 0/046728809 |
| 385 | 0/002824218 | 0/010805334 | 0/05156373 | **1385** | 0/000861223 | 0/009214425 | 0/046728809 |
| 386 | 0/002824218 | 0/010805334 | 0/05156373 | **1386** | 0/000861223 | 0/009214425 | 0/046728809 |
| 387 | 0/002824218 | 0/010805334 | 0/05156373 | **1387** | 0/000861223 | 0/009214425 | 0/046728809 |
| 388 | 0/002824218 | 0/010805334 | 0/05156373 | **1388** | 0/000861223 | 0/009214425 | 0/046728809 |
| 389 | 0/002824218 | 0/010805334 | 0/05156373 | **1389** | 0/000861223 | 0/009214425 | 0/046728809 |
| 390 | 0/002824218 | 0/010805334 | 0/05156373 | **1390** | 0/000861223 | 0/009214425 | 0/046728809 |
| 391 | 0/002824218 | 0/010805334 | 0/05156373 | **1391** | 0/000861223 | 0/0089513 | 0/046728809 |
| 392 | 0/002824218 | 0/010805334 | 0/05156373 | **1392** | 0/000861223 | 0/0089513 | 0/046728809 |
| 393 | 0/002824218 | 0/010805334 | 0/05156373 | **1393** | 0/000861223 | 0/0089513 | 0/046728809 |
| 394 | 0/002824218 | 0/010805334 | 0/05156373 | **1394** | 0/000861223 | 0/0089513 | 0/046728809 |
| 395 | 0/002824218 | 0/010805334 | 0/05156373 | **1395** | 0/000861223 | 0/0089513 | 0/046728809 |
| 396 | 0/002824218 | 0/010805334 | 0/05156373 | **1396** | 0/000861223 | 0/0089513 | 0/046728809 |
| 397 | 0/002824218 | 0/010805334 | 0/05156373 | **1397** | 0/000861223 | 0/0089513 | 0/046728809 |
| 398 | 0/002824218 | 0/010805334 | 0/05156373 | **1398** | 0/000861223 | 0/0089513 | 0/046728809 |
| 399 | 0/002824218 | 0/010805334 | 0/05156373 | **1399** | 0/000861223 | 0/0089513 | 0/046728809 |
| 400 | 0/002824218 | 0/010805334 | 0/05156373 | **1400** | 0/000861223 | 0/0089513 | 0/046728809 |
| 401 | 0/002824218 | 0/010805334 | 0/05156373 | **1401** | 0/000861223 | 0/0089513 | 0/046728809 |
| 402 | 0/002515318 | 0/010805334 | 0/05156373 | **1402** | 0/000861223 | 0/0089513 | 0/046728809 |
| 403 | 0/002515318 | 0/010805334 | 0/05156373 | **1403** | 0/000861223 | 0/0089513 | 0/046728809 |
| 404 | 0/002515318 | 0/010805334 | 0/05156373 | **1404** | 0/000861223 | 0/0089513 | 0/046728809 |
| 405 | 0/002515318 | 0/010805334 | 0/05156373 | **1405** | 0/000861223 | 0/0089513 | 0/046728809 |
| 406 | 0/002515318 | 0/010805334 | 0/05156373 | **1406** | 0/000861223 | 0/0089513 | 0/046728809 |
| 407 | 0/002515318 | 0/010805334 | 0/05156373 | **1407** | 0/000861223 | 0/0089513 | 0/046728809 |
| 408 | 0/002515318 | 0/010805334 | 0/05156373 | **1408** | 0/000861223 | 0/0089513 | 0/046728809 |
| 409 | 0/002515318 | 0/010805334 | 0/05156373 | **1409** | 0/000861223 | 0/0089513 | 0/046728809 |
| 410 | 0/002515318 | 0/010805334 | 0/05156373 | **1410** | 0/000861223 | 0/0089513 | 0/046728809 |
| 411 | 0/002515318 | 0/010805334 | 0/05156373 | **1411** | 0/000861223 | 0/0089513 | 0/046728809 |
| 412 | 0/002071821 | 0/010805334 | 0/05156373 | **1412** | 0/000861223 | 0/0089513 | 0/046728809 |
| 413 | 0/002071821 | 0/010805334 | 0/05156373 | **1413** | 0/000861223 | 0/0089513 | 0/046728809 |
| 414 | 0/002071821 | 0/010805334 | 0/05156373 | **1414** | 0/000861223 | 0/0089513 | 0/046728809 |
| 415 | 0/002071821 | 0/010805334 | 0/05156373 | **1415** | 0/000861223 | 0/0089513 | 0/046728809 |
| 416 | 0/002071821 | 0/010805334 | 0/05156373 | **1416** | 0/000861223 | 0/0089513 | 0/046728809 |
| 417 | 0/002071821 | 0/010805334 | 0/05156373 | **1417** | 0/000861223 | 0/0089513 | 0/046728809 |
| 418 | 0/002071821 | 0/010805334 | 0/05156373 | **1418** | 0/000861223 | 0/0089513 | 0/046728809 |
| 419 | 0/002071821 | 0/010805334 | 0/05156373 | **1419** | 0/000861223 | 0/008690247 | 0/046728809 |
| 420 | 0/002071821 | 0/010805334 | 0/05156373 | **1420** | 0/000861223 | 0/008690247 | 0/046728809 |
| 421 | 0/002071821 | 0/010805334 | 0/05156373 | **1421** | 0/000861223 | 0/008690247 | 0/046728809 |
| 422 | 0/002071821 | 0/010805334 | 0/05156373 | **1422** | 0/000861223 | 0/008690247 | 0/046728809 |
| 423 | 0/002071821 | 0/010805334 | 0/05156373 | **1423** | 0/000861223 | 0/008690247 | 0/046728809 |
| 424 | 0/002071821 | 0/010805334 | 0/05156373 | **1424** | 0/000861223 | 0/008690247 | 0/046728809 |
| 425 | 0/002071821 | 0/010805334 | 0/05156373 | **1425** | 0/000861223 | 0/008690247 | 0/046728809 |
| 426 | 0/002071821 | 0/010805334 | 0/05156373 | **1426** | 0/000861223 | 0/008690247 | 0/046728809 |
| 427 | 0/002071821 | 0/010805334 | 0/05156373 | **1427** | 0/000861223 | 0/008690247 | 0/046728809 |
| 428 | 0/002071821 | 0/010805334 | 0/05156373 | **1428** | 0/000861223 | 0/008690247 | 0/046728809 |
| 429 | 0/002071821 | 0/010805334 | 0/05156373 | **1429** | 0/000861223 | 0/008690247 | 0/046728809 |
| 430 | 0/002071821 | 0/010805334 | 0/05156373 | **1430** | 0/000861223 | 0/008690247 | 0/046728809 |
| 431 | 0/002071821 | 0/010805334 | 0/05156373 | **1431** | 0/000861223 | 0/008690247 | 0/046728809 |
| 432 | 0/002071821 | 0/010805334 | 0/05156373 | **1432** | 0/000861223 | 0/008690247 | 0/046728809 |
| 433 | 0/002071821 | 0/010805334 | 0/051370466 | **1433** | 0/000861223 | 0/008690247 | 0/046728809 |
| 434 | 0/002071821 | 0/010805334 | 0/051370466 | **1434** | 0/000861223 | 0/008690247 | 0/046728809 |
| 435 | 0/002071821 | 0/010805334 | 0/051370466 | **1435** | 0/000861223 | 0/008690247 | 0/046728809 |
| 436 | 0/002071821 | 0/010805334 | 0/051370466 | **1436** | 0/000861223 | 0/008690247 | 0/046728809 |
| 437 | 0/002071821 | 0/010805334 | 0/051370466 | **1437** | 0/000861223 | 0/008690247 | 0/046728809 |
| 438 | 0/002071821 | 0/010805334 | 0/051370466 | **1438** | 0/000861223 | 0/008690247 | 0/046728809 |
| 439 | 0/002071821 | 0/010805334 | 0/051370466 | **1439** | 0/000861223 | 0/008690247 | 0/046728809 |
| 440 | 0/002071821 | 0/010805334 | 0/051370466 | **1440** | 0/000861223 | 0/008690247 | 0/046728809 |
| 441 | 0/002071821 | 0/010805334 | 0/051370466 | **1441** | 0/000861223 | 0/008690247 | 0/046728809 |
| 442 | 0/002071821 | 0/010805334 | 0/051370466 | **1442** | 0/000861223 | 0/008690247 | 0/046728809 |
| 443 | 0/002071821 | 0/010805334 | 0/051370466 | **1443** | 0/000861223 | 0/008690247 | 0/046728809 |
| 444 | 0/002071821 | 0/010805334 | 0/051370466 | **1444** | 0/000861223 | 0/008690247 | 0/046728809 |
| 445 | 0/002071821 | 0/010805334 | 0/051370466 | **1445** | 0/000861223 | 0/008690247 | 0/046728809 |
| 446 | 0/002071821 | 0/010805334 | 0/051370466 | **1446** | 0/000861223 | 0/008690247 | 0/046728809 |
| 447 | 0/002071821 | 0/010805334 | 0/051370466 | **1447** | 0/000861223 | 0/008690247 | 0/046728809 |
| 448 | 0/002071821 | 0/010805334 | 0/051370466 | **1448** | 0/000861223 | 0/008690247 | 0/046728809 |
| 449 | 0/002071821 | 0/010805334 | 0/051370466 | **1449** | 0/000861223 | 0/008690247 | 0/046728809 |
| 450 | 0/002071821 | 0/010805334 | 0/051370466 | **1450** | 0/000861223 | 0/008690247 | 0/046728809 |
| 451 | 0/002071821 | 0/010805334 | 0/051370466 | **1451** | 0/000861223 | 0/008690247 | 0/046728809 |
| 452 | 0/002071821 | 0/010805334 | 0/051370466 | **1452** | 0/000861223 | 0/008690247 | 0/046728809 |
| 453 | 0/002071821 | 0/010805334 | 0/051370466 | **1453** | 0/000828257 | 0/008690247 | 0/046728809 |
| 454 | 0/002071821 | 0/010805334 | 0/051370466 | **1454** | 0/000828257 | 0/008690247 | 0/046728809 |
| 455 | 0/002071821 | 0/010805334 | 0/051370466 | **1455** | 0/000828257 | 0/008690247 | 0/046728809 |
| 456 | 0/002071821 | 0/010805334 | 0/051370466 | **1456** | 0/000828257 | 0/008690247 | 0/046728809 |
| 457 | 0/002071821 | 0/010805334 | 0/051370466 | **1457** | 0/000828257 | 0/008690247 | 0/046728809 |
| 458 | 0/002071821 | 0/010805334 | 0/051370466 | **1458** | 0/000828257 | 0/008690247 | 0/046728809 |
| 459 | 0/002071821 | 0/010805334 | 0/051370466 | **1459** | 0/000828257 | 0/008690247 | 0/046728809 |
| 460 | 0/002071821 | 0/010805334 | 0/051370466 | **1460** | 0/000828257 | 0/008690247 | 0/046728809 |
| 461 | 0/002071821 | 0/010805334 | 0/051370466 | **1461** | 0/000828257 | 0/008690247 | 0/046728809 |
| 462 | 0/002071821 | 0/010805334 | 0/051370466 | **1462** | 0/000828257 | 0/008690247 | 0/046728809 |
| 463 | 0/002071821 | 0/010805334 | 0/051370466 | **1463** | 0/000828257 | 0/008690247 | 0/046728809 |
| 464 | 0/002071821 | 0/010805334 | 0/051370466 | **1464** | 0/000828257 | 0/008690247 | 0/046728809 |
| 465 | 0/002071821 | 0/010805334 | 0/051370466 | **1465** | 0/000828257 | 0/008690247 | 0/046728809 |
| 466 | 0/002071821 | 0/010805334 | 0/051370466 | **1466** | 0/000828257 | 0/008690247 | 0/046728809 |
| 467 | 0/002071821 | 0/010805334 | 0/051370466 | **1467** | 0/000828257 | 0/008690247 | 0/046728809 |
| 468 | 0/002071821 | 0/010805334 | 0/051370466 | **1468** | 0/000828257 | 0/008690247 | 0/046728809 |
| 469 | 0/002071821 | 0/010805334 | 0/051370466 | **1469** | 0/000828257 | 0/008690247 | 0/046728809 |
| 470 | 0/002071821 | 0/010805334 | 0/051370466 | **1470** | 0/000828257 | 0/008690247 | 0/046728809 |
| 471 | 0/002071821 | 0/010805334 | 0/051370466 | **1471** | 0/000828257 | 0/008690247 | 0/046728809 |
| 472 | 0/002071821 | 0/010805334 | 0/051370466 | **1472** | 0/000828257 | 0/008690247 | 0/046728809 |
| 473 | 0/002071821 | 0/010805334 | 0/051370466 | **1473** | 0/000828257 | 0/008690247 | 0/046728809 |
| 474 | 0/002071821 | 0/010805334 | 0/051370466 | **1474** | 0/000828257 | 0/008690247 | 0/046728809 |
| 475 | 0/002071821 | 0/010805334 | 0/051370466 | **1475** | 0/000828257 | 0/008690247 | 0/046728809 |
| 476 | 0/002071821 | 0/010805334 | 0/051370466 | **1476** | 0/000828257 | 0/008690247 | 0/046728809 |
| 477 | 0/002071821 | 0/010805334 | 0/051370466 | **1477** | 0/000828257 | 0/008690247 | 0/046728809 |
| 478 | 0/002071821 | 0/010805334 | 0/051370466 | **1478** | 0/000828257 | 0/008690247 | 0/046728809 |
| 479 | 0/002071821 | 0/010805334 | 0/051370466 | **1479** | 0/000828257 | 0/008690247 | 0/046728809 |
| 480 | 0/002071821 | 0/010805334 | 0/051370466 | **1480** | 0/000828257 | 0/008690247 | 0/046728809 |
| 481 | 0/002071821 | 0/010805334 | 0/051370466 | **1481** | 0/000828257 | 0/008690247 | 0/046728809 |
| 482 | 0/002071821 | 0/010805334 | 0/051370466 | **1482** | 0/000828257 | 0/008690247 | 0/046728809 |
| 483 | 0/002071821 | 0/010805334 | 0/051370466 | **1483** | 0/000828257 | 0/008690247 | 0/046728809 |
| 484 | 0/002071821 | 0/010805334 | 0/051370466 | **1484** | 0/000828257 | 0/008690247 | 0/046728809 |
| 485 | 0/002071821 | 0/010805334 | 0/051370466 | **1485** | 0/000828257 | 0/008690247 | 0/046728809 |
| 486 | 0/002071821 | 0/010805334 | 0/051370466 | **1486** | 0/000828257 | 0/008690247 | 0/046728809 |
| 487 | 0/002071821 | 0/010805334 | 0/051370466 | **1487** | 0/000828257 | 0/008690247 | 0/046728809 |
| 488 | 0/002071821 | 0/010805334 | 0/051370466 | **1488** | 0/000828257 | 0/008690247 | 0/046728809 |
| 489 | 0/002071821 | 0/010805334 | 0/051370466 | **1489** | 0/000828257 | 0/008690247 | 0/046728809 |
| 490 | 0/002071821 | 0/010805334 | 0/051370466 | **1490** | 0/000828257 | 0/008690247 | 0/046728809 |
| 491 | 0/002071821 | 0/010805334 | 0/051370466 | **1491** | 0/000828257 | 0/008690247 | 0/046728809 |
| 492 | 0/002071821 | 0/010805334 | 0/051370466 | **1492** | 0/000828257 | 0/008690247 | 0/046728809 |
| 493 | 0/002071821 | 0/010805334 | 0/051370466 | **1493** | 0/000828257 | 0/008690247 | 0/046728809 |
| 494 | 0/002071821 | 0/010805334 | 0/051370466 | **1494** | 0/000828257 | 0/008690247 | 0/046728809 |
| 495 | 0/002071821 | 0/010805334 | 0/051370466 | **1495** | 0/000828257 | 0/008690247 | 0/046728809 |
| 496 | 0/002071821 | 0/010805334 | 0/051370466 | **1496** | 0/000828257 | 0/008690247 | 0/046728809 |
| 497 | 0/002071821 | 0/010805334 | 0/051370466 | **1497** | 0/000828257 | 0/008690247 | 0/046728809 |
| 498 | 0/002071821 | 0/010805334 | 0/051370466 | **1498** | 0/000828257 | 0/008690247 | 0/046728809 |
| 499 | 0/002071821 | 0/010805334 | 0/051370466 | **1499** | 0/000828257 | 0/008690247 | 0/046728809 |
| 500 | 0/002071821 | 0/010805334 | 0/051370466 | **1500** | 0/000828257 | 0/008690247 | 0/046728809 |
| 501 | 0/002071821 | 0/010805334 | 0/051370466 | **1501** | 0/000828257 | 0/008690247 | 0/046728809 |
| 502 | 0/002071821 | 0/010805334 | 0/051370466 | **1502** | 0/000828257 | 0/008690247 | 0/046728809 |
| 503 | 0/002071821 | 0/010805334 | 0/051370466 | **1503** | 0/000828257 | 0/008690247 | 0/046728809 |
| 504 | 0/002071821 | 0/010805334 | 0/051370466 | **1504** | 0/000828257 | 0/008690247 | 0/046728809 |
| 505 | 0/002071821 | 0/010805334 | 0/051370466 | **1505** | 0/000828257 | 0/008690247 | 0/046728809 |
| 506 | 0/002071821 | 0/010805334 | 0/051370466 | **1506** | 0/000828257 | 0/008690247 | 0/046728809 |
| 507 | 0/002071821 | 0/010805334 | 0/051370466 | **1507** | 0/000828257 | 0/008690247 | 0/046728809 |
| 508 | 0/002071821 | 0/010805334 | 0/051370466 | **1508** | 0/000828257 | 0/008690247 | 0/046728809 |
| 509 | 0/002071821 | 0/010805334 | 0/051370466 | **1509** | 0/000828257 | 0/008690247 | 0/046728809 |
| 510 | 0/002071821 | 0/010805334 | 0/051370466 | **1510** | 0/000828257 | 0/008690247 | 0/046728809 |
| 511 | 0/002071821 | 0/010805334 | 0/051370466 | **1511** | 0/000828257 | 0/008690247 | 0/046728809 |
| 512 | 0/002071821 | 0/010805334 | 0/051370466 | **1512** | 0/000828257 | 0/008690247 | 0/046728809 |
| 513 | 0/002071821 | 0/010805334 | 0/051370466 | **1513** | 0/000828257 | 0/008690247 | 0/046728809 |
| 514 | 0/002071821 | 0/010805334 | 0/051370466 | **1514** | 0/000828257 | 0/008690247 | 0/046728809 |
| 515 | 0/002071821 | 0/010805334 | 0/051370466 | **1515** | 0/000828257 | 0/008690247 | 0/046728809 |
| 516 | 0/002071821 | 0/010805334 | 0/051370466 | **1516** | 0/000828257 | 0/008690247 | 0/046728809 |
| 517 | 0/002071821 | 0/010805334 | 0/051370466 | **1517** | 0/000828257 | 0/008690247 | 0/046728809 |
| 518 | 0/002071821 | 0/010805334 | 0/051370466 | **1518** | 0/000828257 | 0/008690247 | 0/046728809 |
| 519 | 0/002071821 | 0/010805334 | 0/051370466 | **1519** | 0/000828257 | 0/008690247 | 0/046728809 |
| 520 | 0/002071821 | 0/010805334 | 0/051370466 | **1520** | 0/000828257 | 0/008690247 | 0/046728809 |
| 521 | 0/002071821 | 0/010805334 | 0/051370466 | **1521** | 0/000828257 | 0/008690247 | 0/046728809 |
| 522 | 0/002071821 | 0/010805334 | 0/051370466 | **1522** | 0/000828257 | 0/008690247 | 0/046728809 |
| 523 | 0/002071821 | 0/010805334 | 0/051370466 | **1523** | 0/000828257 | 0/008690247 | 0/046728809 |
| 524 | 0/002071821 | 0/010805334 | 0/051370466 | **1524** | 0/000828257 | 0/008690247 | 0/046728809 |
| 525 | 0/002071821 | 0/010805334 | 0/051370466 | **1525** | 0/000828257 | 0/008690247 | 0/046728809 |
| 526 | 0/002071821 | 0/010805334 | 0/051370466 | **1526** | 0/000828257 | 0/008690247 | 0/046728809 |
| 527 | 0/002071821 | 0/010805334 | 0/051370466 | **1527** | 0/000828257 | 0/008690247 | 0/046728809 |
| 528 | 0/002071821 | 0/010805334 | 0/051370466 | **1528** | 0/000828257 | 0/008690247 | 0/046728809 |
| 529 | 0/002071821 | 0/010805334 | 0/051370466 | **1529** | 0/000828257 | 0/008690247 | 0/046728809 |
| 530 | 0/002071821 | 0/010805334 | 0/051370466 | **1530** | 0/000828257 | 0/008690247 | 0/046728809 |
| 531 | 0/002071821 | 0/010805334 | 0/051370466 | **1531** | 0/000828257 | 0/008690247 | 0/046728809 |
| 532 | 0/002071821 | 0/010805334 | 0/051370466 | **1532** | 0/000828257 | 0/008690247 | 0/046728809 |
| 533 | 0/002071821 | 0/010805334 | 0/051370466 | **1533** | 0/000828257 | 0/008690247 | 0/046728809 |
| 534 | 0/002053573 | 0/010805334 | 0/051370466 | **1534** | 0/000828257 | 0/008690247 | 0/046728809 |
| 535 | 0/002053573 | 0/010805334 | 0/051370466 | **1535** | 0/000828257 | 0/008690247 | 0/046728809 |
| 536 | 0/002053573 | 0/010805334 | 0/051370466 | **1536** | 0/000828257 | 0/008690247 | 0/046728809 |
| 537 | 0/002053573 | 0/01024139 | 0/051370466 | **1537** | 0/000828257 | 0/008690247 | 0/046728809 |
| 538 | 0/002053573 | 0/01024139 | 0/051370466 | **1538** | 0/000828257 | 0/008690247 | 0/046728809 |
| 539 | 0/002053573 | 0/01024139 | 0/051370466 | **1539** | 0/000828257 | 0/008690247 | 0/046728809 |
| 540 | 0/002053573 | 0/01024139 | 0/051370466 | **1540** | 0/000828257 | 0/008690247 | 0/046728809 |
| 541 | 0/002053573 | 0/01024139 | 0/051370466 | **1541** | 0/000828257 | 0/008690247 | 0/046728809 |
| 542 | 0/002053573 | 0/01024139 | 0/051370466 | **1542** | 0/000828257 | 0/008690247 | 0/046728809 |
| 543 | 0/002053573 | 0/01024139 | 0/051370466 | **1543** | 0/000828257 | 0/008690247 | 0/046728809 |
| 544 | 0/002053573 | 0/01024139 | 0/051370466 | **1544** | 0/000828257 | 0/008690247 | 0/046728809 |
| 545 | 0/002053573 | 0/01024139 | 0/051370466 | **1545** | 0/000828257 | 0/008690247 | 0/046728809 |
| 546 | 0/002053573 | 0/01024139 | 0/051370466 | **1546** | 0/000828257 | 0/008690247 | 0/046728809 |
| 547 | 0/002053573 | 0/01024139 | 0/051370466 | **1547** | 0/000828257 | 0/008690247 | 0/046728809 |
| 548 | 0/002053573 | 0/01024139 | 0/051370466 | **1548** | 0/000828257 | 0/008690247 | 0/046728809 |
| 549 | 0/002053573 | 0/01024139 | 0/051370466 | **1549** | 0/000828257 | 0/008690247 | 0/046728809 |
| 550 | 0/002053573 | 0/01024139 | 0/051370466 | **1550** | 0/000828257 | 0/008690247 | 0/046728809 |
| 551 | 0/002053573 | 0/01024139 | 0/051370466 | **1551** | 0/000828257 | 0/008690247 | 0/046728809 |
| 552 | 0/002053573 | 0/01024139 | 0/051370466 | **1552** | 0/000828257 | 0/008690247 | 0/046728809 |
| 553 | 0/001947435 | 0/01024139 | 0/051370466 | **1553** | 0/000828257 | 0/008690247 | 0/046728809 |
| 554 | 0/001947435 | 0/01024139 | 0/051370466 | **1554** | 0/000828257 | 0/008690247 | 0/046728809 |
| 555 | 0/001947435 | 0/01024139 | 0/051370466 | **1555** | 0/000828257 | 0/008690247 | 0/046728809 |
| 556 | 0/001947435 | 0/01024139 | 0/051370466 | **1556** | 0/000828257 | 0/008690247 | 0/046728809 |
| 557 | 0/001947435 | 0/01024139 | 0/051370466 | **1557** | 0/000828257 | 0/008690247 | 0/046728809 |
| 558 | 0/001947435 | 0/01024139 | 0/051370466 | **1558** | 0/000828257 | 0/008690247 | 0/046728809 |
| 559 | 0/001947435 | 0/01024139 | 0/051370466 | **1559** | 0/000828257 | 0/008690247 | 0/046728809 |
| 560 | 0/001947435 | 0/01024139 | 0/051370466 | **1560** | 0/000828257 | 0/008690247 | 0/046728809 |
| 561 | 0/001947435 | 0/01024139 | 0/051370466 | **1561** | 0/000828257 | 0/008690247 | 0/046728809 |
| 562 | 0/001947435 | 0/01024139 | 0/051370466 | **1562** | 0/000828257 | 0/008690247 | 0/046687086 |
| 563 | 0/001947435 | 0/01024139 | 0/051370466 | **1563** | 0/000828257 | 0/008690247 | 0/046687086 |
| 564 | 0/001947435 | 0/01024139 | 0/051370466 | **1564** | 0/000828257 | 0/008690247 | 0/046687086 |
| 565 | 0/001947435 | 0/01024139 | 0/051370466 | **1565** | 0/000828257 | 0/008690247 | 0/046687086 |
| 566 | 0/001947435 | 0/01024139 | 0/051370466 | **1566** | 0/000828257 | 0/008690247 | 0/046687086 |
| 567 | 0/001947435 | 0/01024139 | 0/051370466 | **1567** | 0/000828257 | 0/008690247 | 0/046687086 |
| 568 | 0/001947435 | 0/01024139 | 0/051370466 | **1568** | 0/000828257 | 0/008690247 | 0/046687086 |
| 569 | 0/001947435 | 0/01024139 | 0/051370466 | **1569** | 0/000828257 | 0/008690247 | 0/046687086 |
| 570 | 0/001947435 | 0/01024139 | 0/051370466 | **1570** | 0/000828257 | 0/008690247 | 0/046687086 |
| 571 | 0/001947435 | 0/01024139 | 0/051370466 | **1571** | 0/000828257 | 0/008690247 | 0/046687086 |
| 572 | 0/001947435 | 0/01024139 | 0/051370466 | **1572** | 0/000820128 | 0/008690247 | 0/046687086 |
| 573 | 0/001947435 | 0/01024139 | 0/051370466 | **1573** | 0/000820128 | 0/008690247 | 0/046687086 |
| 574 | 0/001947435 | 0/01024139 | 0/051370466 | **1574** | 0/000820128 | 0/008690247 | 0/046687086 |
| 575 | 0/001947435 | 0/01024139 | 0/05031877 | **1575** | 0/000820128 | 0/008690247 | 0/046687086 |
| 576 | 0/001947435 | 0/01024139 | 0/05031877 | **1576** | 0/000820128 | 0/008690247 | 0/046687086 |
| 577 | 0/001947435 | 0/01024139 | 0/05031877 | **1577** | 0/000820128 | 0/008690247 | 0/046687086 |
| 578 | 0/001947435 | 0/01024139 | 0/05031877 | **1578** | 0/000820128 | 0/008690247 | 0/046687086 |
| 579 | 0/001947435 | 0/01024139 | 0/05031877 | **1579** | 0/000820128 | 0/008690247 | 0/046687086 |
| 580 | 0/001947435 | 0/01024139 | 0/05031877 | **1580** | 0/000820128 | 0/008690247 | 0/046687086 |
| 581 | 0/001947435 | 0/01024139 | 0/05031877 | **1581** | 0/000820128 | 0/008690247 | 0/046665089 |
| 582 | 0/001947435 | 0/01024139 | 0/05031877 | **1582** | 0/000820128 | 0/008690247 | 0/046191875 |
| 583 | 0/001947435 | 0/01024139 | 0/05031877 | **1583** | 0/000820128 | 0/008690247 | 0/046191875 |
| 584 | 0/001947435 | 0/01024139 | 0/05031877 | **1584** | 0/000820128 | 0/008690247 | 0/046191875 |
| 585 | 0/001947435 | 0/01024139 | 0/05031877 | **1585** | 0/000820128 | 0/008690247 | 0/046191875 |
| 586 | 0/001947435 | 0/01024139 | 0/05031877 | **1586** | 0/000820128 | 0/008690247 | 0/046191875 |
| 587 | 0/001947435 | 0/01024139 | 0/05031877 | **1587** | 0/000820128 | 0/008690247 | 0/046191875 |
| 588 | 0/001947435 | 0/01024139 | 0/05031877 | **1588** | 0/000820128 | 0/008690247 | 0/046191875 |
| 589 | 0/001947435 | 0/01024139 | 0/05031877 | **1589** | 0/000820128 | 0/008690247 | 0/046191875 |
| 590 | 0/001947435 | 0/01024139 | 0/05031877 | **1590** | 0/000820128 | 0/008690247 | 0/046191875 |
| 591 | 0/001947435 | 0/01024139 | 0/05031877 | **1591** | 0/000820128 | 0/008690247 | 0/046191875 |
| 592 | 0/001947435 | 0/01024139 | 0/05031877 | **1592** | 0/000820128 | 0/008690247 | 0/046191875 |
| 593 | 0/001947435 | 0/01024139 | 0/05031877 | **1593** | 0/000820128 | 0/008690247 | 0/046191875 |
| 594 | 0/001947435 | 0/01024139 | 0/05031877 | **1594** | 0/000820128 | 0/008690247 | 0/046191875 |
| 595 | 0/001947435 | 0/01024139 | 0/05031877 | **1595** | 0/000820128 | 0/008690247 | 0/046191875 |
| 596 | 0/001947435 | 0/01024139 | 0/05031877 | **1596** | 0/000820128 | 0/008690247 | 0/046191875 |
| 597 | 0/001947435 | 0/01024139 | 0/05031877 | **1597** | 0/000820128 | 0/008690247 | 0/046191875 |
| 598 | 0/001947435 | 0/01024139 | 0/05031877 | **1598** | 0/000820128 | 0/008690247 | 0/046191875 |
| 599 | 0/001947435 | 0/01024139 | 0/05031877 | **1599** | 0/000820128 | 0/008690247 | 0/046191875 |
| 600 | 0/001947435 | 0/01024139 | 0/05031877 | **1600** | 0/000820128 | 0/008690247 | 0/046191875 |
| 601 | 0/001947435 | 0/01024139 | 0/05031877 | **1601** | 0/000820128 | 0/008690247 | 0/046191875 |
| 602 | 0/001947435 | 0/01024139 | 0/05031877 | **1602** | 0/000820128 | 0/008690247 | 0/046191875 |
| 603 | 0/00188767 | 0/01024139 | 0/05031877 | **1603** | 0/000820128 | 0/008690247 | 0/046191875 |
| 604 | 0/00188767 | 0/01024139 | 0/05031877 | **1604** | 0/000820128 | 0/008690247 | 0/046191875 |
| 605 | 0/00188767 | 0/01024139 | 0/05031877 | **1605** | 0/000820128 | 0/008690247 | 0/046191875 |
| 606 | 0/00188767 | 0/01024139 | 0/05031877 | **1606** | 0/000820128 | 0/008690247 | 0/046191875 |
| 607 | 0/00188767 | 0/01024139 | 0/05031877 | **1607** | 0/000820128 | 0/008690247 | 0/046191875 |
| 608 | 0/00188767 | 0/01024139 | 0/05031877 | **1608** | 0/000820128 | 0/008690247 | 0/046191875 |
| 609 | 0/00188767 | 0/01024139 | 0/05031877 | **1609** | 0/000820128 | 0/008690247 | 0/046191875 |
| 610 | 0/00188767 | 0/01024139 | 0/05031877 | **1610** | 0/000820128 | 0/008690247 | 0/046191875 |
| 611 | 0/00188767 | 0/01024139 | 0/05031877 | **1611** | 0/000820128 | 0/008690247 | 0/046191875 |
| 612 | 0/00188767 | 0/01024139 | 0/05031877 | **1612** | 0/000820128 | 0/008690247 | 0/046191875 |
| 613 | 0/00188767 | 0/01024139 | 0/05031877 | **1613** | 0/000820128 | 0/008690247 | 0/046191875 |
| 614 | 0/00188767 | 0/01024139 | 0/05031877 | **1614** | 0/000820128 | 0/008690247 | 0/046191875 |
| 615 | 0/00188767 | 0/01024139 | 0/05031877 | **1615** | 0/000820128 | 0/008690247 | 0/046191875 |
| 616 | 0/00188767 | 0/01024139 | 0/05031877 | **1616** | 0/000820128 | 0/008690247 | 0/046191875 |
| 617 | 0/00188767 | 0/01024139 | 0/05031877 | **1617** | 0/000820128 | 0/008690247 | 0/046191875 |
| 618 | 0/00188767 | 0/01024139 | 0/05031877 | **1618** | 0/000820128 | 0/008690247 | 0/046191875 |
| 619 | 0/00188767 | 0/01024139 | 0/05031877 | **1619** | 0/000820128 | 0/008690247 | 0/046191875 |
| 620 | 0/00188767 | 0/01024139 | 0/05031877 | **1620** | 0/000820128 | 0/008690247 | 0/046191875 |
| 621 | 0/00188767 | 0/01024139 | 0/05031877 | **1621** | 0/000820128 | 0/008690247 | 0/046191875 |
| 622 | 0/00188767 | 0/01024139 | 0/05031877 | **1622** | 0/000820128 | 0/008690247 | 0/046191875 |
| 623 | 0/00188767 | 0/01024139 | 0/05031877 | **1623** | 0/000820128 | 0/008690247 | 0/046191875 |
| 624 | 0/00188767 | 0/01024139 | 0/05031877 | **1624** | 0/000820128 | 0/008690247 | 0/046191875 |
| 625 | 0/00188767 | 0/01024139 | 0/05031877 | **1625** | 0/000820128 | 0/008690247 | 0/046191875 |
| 626 | 0/00188767 | 0/01024139 | 0/05031877 | **1626** | 0/000820128 | 0/008690247 | 0/046191875 |
| 627 | 0/00188767 | 0/01024139 | 0/05031877 | **1627** | 0/000820128 | 0/008690247 | 0/046191875 |
| 628 | 0/00188767 | 0/01024139 | 0/05031877 | **1628** | 0/000820128 | 0/008690247 | 0/046191875 |
| 629 | 0/00188767 | 0/01024139 | 0/05031877 | **1629** | 0/000820128 | 0/008690247 | 0/046191875 |
| 630 | 0/00188767 | 0/01024139 | 0/05031877 | **1630** | 0/000820128 | 0/008690247 | 0/046191875 |
| 631 | 0/00188767 | 0/01024139 | 0/05031877 | **1631** | 0/000820128 | 0/008690247 | 0/046191875 |
| 632 | 0/00188767 | 0/01024139 | 0/05031877 | **1632** | 0/000820128 | 0/008690247 | 0/046191875 |
| 633 | 0/00188767 | 0/01024139 | 0/05031877 | **1633** | 0/000820128 | 0/008690247 | 0/046191875 |
| 634 | 0/00188767 | 0/01024139 | 0/05031877 | **1634** | 0/000820128 | 0/008690247 | 0/046191875 |
| 635 | 0/00188767 | 0/01024139 | 0/05031877 | **1635** | 0/000820128 | 0/008690247 | 0/046191875 |
| 636 | 0/00188767 | 0/01024139 | 0/05031877 | **1636** | 0/000820128 | 0/008690247 | 0/046191875 |
| 637 | 0/00188767 | 0/01024139 | 0/05031877 | **1637** | 0/000820128 | 0/008690247 | 0/046191875 |
| 638 | 0/00188767 | 0/01024139 | 0/05031877 | **1638** | 0/000820128 | 0/008690247 | 0/046191875 |
| 639 | 0/00188767 | 0/01024139 | 0/05031877 | **1639** | 0/000820128 | 0/008690247 | 0/046191875 |
| 640 | 0/00188767 | 0/01024139 | 0/05031877 | **1640** | 0/000820128 | 0/008690247 | 0/046191875 |
| 641 | 0/00188767 | 0/01024139 | 0/05031877 | **1641** | 0/000820128 | 0/008690247 | 0/046191875 |
| 642 | 0/00188767 | 0/01024139 | 0/05031877 | **1642** | 0/000820128 | 0/008690247 | 0/046191875 |
| 643 | 0/00188767 | 0/01024139 | 0/05031877 | **1643** | 0/000820128 | 0/008690247 | 0/046191875 |
| 644 | 0/00188767 | 0/01024139 | 0/05031877 | **1644** | 0/000820128 | 0/008690247 | 0/046191875 |
| 645 | 0/00188767 | 0/01024139 | 0/05031877 | **1645** | 0/000820128 | 0/008690247 | 0/046191875 |
| 646 | 0/00188767 | 0/01024139 | 0/05031877 | **1646** | 0/000820128 | 0/008690247 | 0/046191875 |
| 647 | 0/00188767 | 0/01024139 | 0/05031877 | **1647** | 0/000820128 | 0/008690247 | 0/046191875 |
| 648 | 0/00188767 | 0/01024139 | 0/05031877 | **1648** | 0/000820128 | 0/008690247 | 0/046191875 |
| 649 | 0/00188767 | 0/01024139 | 0/05031877 | **1649** | 0/000820128 | 0/008690247 | 0/046191875 |
| 650 | 0/00188767 | 0/01024139 | 0/05031877 | **1650** | 0/000820128 | 0/008690247 | 0/046191875 |
| 651 | 0/00188767 | 0/01024139 | 0/05031877 | **1651** | 0/000820128 | 0/008690247 | 0/046191875 |
| 652 | 0/00188767 | 0/01024139 | 0/05031877 | **1652** | 0/000820128 | 0/008690247 | 0/046191875 |
| 653 | 0/00188767 | 0/01024139 | 0/05031877 | **1653** | 0/000820128 | 0/008690247 | 0/046191875 |
| 654 | 0/00188767 | 0/01024139 | 0/05031877 | **1654** | 0/000820128 | 0/008690247 | 0/046191875 |
| 655 | 0/00188767 | 0/01024139 | 0/05031877 | **1655** | 0/000820128 | 0/008690247 | 0/046191875 |
| 656 | 0/00188767 | 0/01024139 | 0/05031877 | **1656** | 0/000820128 | 0/008690247 | 0/046191875 |
| 657 | 0/00188767 | 0/01024139 | 0/05031877 | **1657** | 0/000820128 | 0/008690247 | 0/046191875 |
| 658 | 0/00188767 | 0/01024139 | 0/05031877 | **1658** | 0/000820128 | 0/008690247 | 0/046191875 |
| 659 | 0/00188767 | 0/01024139 | 0/05031877 | **1659** | 0/000820128 | 0/008690247 | 0/046191875 |
| 660 | 0/00188767 | 0/01024139 | 0/05031877 | **1660** | 0/000820128 | 0/008690247 | 0/046191875 |
| 661 | 0/00188767 | 0/01024139 | 0/05031877 | **1661** | 0/000820128 | 0/008644874 | 0/046191875 |
| 662 | 0/00188767 | 0/01024139 | 0/05031877 | **1662** | 0/000820128 | 0/008644874 | 0/046191875 |
| 663 | 0/00188767 | 0/01024139 | 0/05031877 | **1663** | 0/000820128 | 0/008644874 | 0/046191875 |
| 664 | 0/00188767 | 0/01024139 | 0/05031877 | **1664** | 0/000820128 | 0/008644874 | 0/046191875 |
| 665 | 0/00188767 | 0/01024139 | 0/05031877 | **1665** | 0/000820128 | 0/008644874 | 0/046191875 |
| 666 | 0/00188767 | 0/01024139 | 0/05031877 | **1666** | 0/000820128 | 0/008644874 | 0/046191875 |
| 667 | 0/001378853 | 0/01024139 | 0/05031877 | **1667** | 0/000820128 | 0/008644874 | 0/046131559 |
| 668 | 0/001378853 | 0/01024139 | 0/05031877 | **1668** | 0/000820128 | 0/008644874 | 0/046131559 |
| 669 | 0/001378853 | 0/01024139 | 0/05031877 | **1669** | 0/000820128 | 0/008644874 | 0/046131559 |
| 670 | 0/001378853 | 0/01024139 | 0/05031877 | **1670** | 0/000820128 | 0/008644874 | 0/046131559 |
| 671 | 0/001378853 | 0/01024139 | 0/05031877 | **1671** | 0/000820128 | 0/008644874 | 0/046131559 |
| 672 | 0/001378853 | 0/01024139 | 0/05031877 | **1672** | 0/000820128 | 0/008644874 | 0/046131559 |
| 673 | 0/001378853 | 0/01024139 | 0/05031877 | **1673** | 0/000820128 | 0/008644874 | 0/046131559 |
| 674 | 0/001378853 | 0/01024139 | 0/05031877 | **1674** | 0/000820128 | 0/008644874 | 0/046131559 |
| 675 | 0/001378853 | 0/01024139 | 0/05031877 | **1675** | 0/000820128 | 0/008644874 | 0/046131559 |
| 676 | 0/001378853 | 0/01024139 | 0/05031877 | **1676** | 0/000820128 | 0/008644874 | 0/046131559 |
| 677 | 0/001378853 | 0/01024139 | 0/05031877 | **1677** | 0/000820128 | 0/008644874 | 0/046131559 |
| 678 | 0/001378853 | 0/01024139 | 0/05031877 | **1678** | 0/000820128 | 0/008644874 | 0/046131559 |
| 679 | 0/001378853 | 0/01024139 | 0/05031877 | **1679** | 0/000820128 | 0/008644874 | 0/046131559 |
| 680 | 0/001378853 | 0/01024139 | 0/05031877 | **1680** | 0/000820128 | 0/008644874 | 0/046131559 |
| 681 | 0/001378853 | 0/01024139 | 0/05031877 | **1681** | 0/000820128 | 0/008644874 | 0/046131559 |
| 682 | 0/001378853 | 0/01024139 | 0/05031877 | **1682** | 0/000820128 | 0/008644874 | 0/046131559 |
| 683 | 0/001378853 | 0/01024139 | 0/05031877 | **1683** | 0/000820128 | 0/008644874 | 0/046131559 |
| 684 | 0/001378853 | 0/01024139 | 0/05031877 | **1684** | 0/000820128 | 0/008644874 | 0/046131559 |
| 685 | 0/001378853 | 0/01024139 | 0/05031877 | **1685** | 0/000820128 | 0/008644874 | 0/046131559 |
| 686 | 0/001378853 | 0/01024139 | 0/05031877 | **1686** | 0/000820128 | 0/008644874 | 0/046131559 |
| 687 | 0/001378853 | 0/01024139 | 0/05031877 | **1687** | 0/000820128 | 0/008644874 | 0/046131559 |
| 688 | 0/001378853 | 0/01024139 | 0/05031877 | **1688** | 0/000820128 | 0/008644874 | 0/046131559 |
| 689 | 0/001378853 | 0/01024139 | 0/049428217 | **1689** | 0/000820128 | 0/008644874 | 0/046131559 |
| 690 | 0/001378853 | 0/01024139 | 0/049428217 | **1690** | 0/000820128 | 0/008644874 | 0/046131559 |
| 691 | 0/001378853 | 0/01024139 | 0/049428217 | **1691** | 0/000820128 | 0/008644874 | 0/046131559 |
| 692 | 0/001378853 | 0/01024139 | 0/049428217 | **1692** | 0/000820128 | 0/008644874 | 0/046131559 |
| 693 | 0/001378853 | 0/01024139 | 0/049428217 | **1693** | 0/000820128 | 0/008644874 | 0/046131559 |
| 694 | 0/001378853 | 0/01024139 | 0/049428217 | **1694** | 0/000820128 | 0/008644874 | 0/046131559 |
| 695 | 0/001378853 | 0/01024139 | 0/049428217 | **1695** | 0/000820128 | 0/008644874 | 0/046131559 |
| 696 | 0/001378853 | 0/01024139 | 0/049428217 | **1696** | 0/000820128 | 0/008644874 | 0/046131559 |
| 697 | 0/001378853 | 0/01024139 | 0/049428217 | **1697** | 0/000820128 | 0/008644874 | 0/046131559 |
| 698 | 0/001378853 | 0/01024139 | 0/049428217 | **1698** | 0/000820128 | 0/008644874 | 0/046131559 |
| 699 | 0/001378853 | 0/01024139 | 0/049428217 | **1699** | 0/000820128 | 0/008644874 | 0/046131559 |
| 700 | 0/001378853 | 0/01024139 | 0/049428217 | **1700** | 0/000820128 | 0/008644874 | 0/046131559 |
| 701 | 0/001378853 | 0/01024139 | 0/049428217 | **1701** | 0/000820128 | 0/008644874 | 0/046131559 |
| 702 | 0/001378853 | 0/01024139 | 0/049428217 | **1702** | 0/000820128 | 0/008644874 | 0/046131559 |
| 703 | 0/001378853 | 0/01024139 | 0/049428217 | **1703** | 0/000820128 | 0/008644874 | 0/046131559 |
| 704 | 0/001378853 | 0/01024139 | 0/049428217 | **1704** | 0/000820128 | 0/008644874 | 0/046131559 |
| 705 | 0/001378853 | 0/01024139 | 0/049428217 | **1705** | 0/000820128 | 0/008644874 | 0/046131559 |
| 706 | 0/001378853 | 0/01024139 | 0/049428217 | **1706** | 0/000820128 | 0/008644874 | 0/046131559 |
| 707 | 0/001378853 | 0/01024139 | 0/049428217 | **1707** | 0/000820128 | 0/008644874 | 0/046131559 |
| 708 | 0/001378853 | 0/01024139 | 0/049428217 | **1708** | 0/000820128 | 0/008644874 | 0/046131559 |
| 709 | 0/001378853 | 0/01024139 | 0/049428217 | **1709** | 0/000820128 | 0/008644874 | 0/046131559 |
| 710 | 0/001378853 | 0/01024139 | 0/049428217 | **1710** | 0/000820128 | 0/008644874 | 0/046131559 |
| 711 | 0/001378853 | 0/01024139 | 0/049428217 | **1711** | 0/000817657 | 0/008644874 | 0/046131559 |
| 712 | 0/001378853 | 0/01024139 | 0/049428217 | **1712** | 0/000817657 | 0/008644874 | 0/045921755 |
| 713 | 0/001378853 | 0/01024139 | 0/049428217 | **1713** | 0/000817657 | 0/008644874 | 0/045921755 |
| 714 | 0/001378853 | 0/01024139 | 0/049428217 | **1714** | 0/000817657 | 0/008644874 | 0/045921755 |
| 715 | 0/001378853 | 0/01024139 | 0/049428217 | **1715** | 0/000817657 | 0/008644874 | 0/045921755 |
| 716 | 0/001378853 | 0/01024139 | 0/049428217 | **1716** | 0/000817657 | 0/008644874 | 0/045921755 |
| 717 | 0/001378853 | 0/01024139 | 0/049428217 | **1717** | 0/000817657 | 0/008644874 | 0/045921755 |
| 718 | 0/001378853 | 0/01024139 | 0/049428217 | **1718** | 0/000817657 | 0/008644874 | 0/045921755 |
| 719 | 0/001378853 | 0/01024139 | 0/049428217 | **1719** | 0/000817657 | 0/008644874 | 0/045921755 |
| 720 | 0/001378853 | 0/01024139 | 0/049428217 | **1720** | 0/000817657 | 0/008644874 | 0/045921755 |
| 721 | 0/001378853 | 0/01024139 | 0/049428217 | **1721** | 0/000817657 | 0/008644874 | 0/045921755 |
| 722 | 0/001378853 | 0/01024139 | 0/049428217 | **1722** | 0/000817657 | 0/008644874 | 0/045921755 |
| 723 | 0/001378853 | 0/01024139 | 0/049428217 | **1723** | 0/000817657 | 0/008644874 | 0/045921755 |
| 724 | 0/001378853 | 0/01024139 | 0/049428217 | **1724** | 0/000817657 | 0/008644874 | 0/045921755 |
| 725 | 0/001378853 | 0/01024139 | 0/049428217 | **1725** | 0/000817657 | 0/008644874 | 0/045921755 |
| 726 | 0/001378853 | 0/01024139 | 0/049428217 | **1726** | 0/000817657 | 0/008644874 | 0/045921755 |
| 727 | 0/001378853 | 0/01024139 | 0/049428217 | **1727** | 0/000817657 | 0/008644874 | 0/045921755 |
| 728 | 0/001378853 | 0/01024139 | 0/049428217 | **1728** | 0/000817657 | 0/008644874 | 0/045921755 |
| 729 | 0/001378853 | 0/01024139 | 0/049428217 | **1729** | 0/000817657 | 0/008644874 | 0/045921755 |
| 730 | 0/001378853 | 0/01024139 | 0/049428217 | **1730** | 0/000817657 | 0/008641944 | 0/045921755 |
| 731 | 0/001378853 | 0/01024139 | 0/049428217 | **1731** | 0/000817657 | 0/008641944 | 0/045921755 |
| 732 | 0/001378853 | 0/01024139 | 0/049428217 | **1732** | 0/000817657 | 0/008641944 | 0/045921755 |
| 733 | 0/001378853 | 0/01024139 | 0/049428217 | **1733** | 0/000817657 | 0/008641944 | 0/045921755 |
| 734 | 0/001378853 | 0/01024139 | 0/049428217 | **1734** | 0/000817657 | 0/008641944 | 0/045921755 |
| 735 | 0/001378853 | 0/01024139 | 0/049428217 | **1735** | 0/000817657 | 0/008641944 | 0/045921755 |
| 736 | 0/001378853 | 0/01024139 | 0/049428217 | **1736** | 0/000817657 | 0/008641944 | 0/045921755 |
| 737 | 0/001378853 | 0/01024139 | 0/049428217 | **1737** | 0/000817657 | 0/008641944 | 0/045921755 |
| 738 | 0/001378853 | 0/01024139 | 0/049428217 | **1738** | 0/000817657 | 0/008641944 | 0/045921755 |
| 739 | 0/001378853 | 0/01024139 | 0/049428217 | **1739** | 0/000817657 | 0/008641944 | 0/045921755 |
| 740 | 0/001378853 | 0/01024139 | 0/049428217 | **1740** | 0/000817657 | 0/008641944 | 0/045921755 |
| 741 | 0/001378853 | 0/01024139 | 0/049428217 | **1741** | 0/000817657 | 0/008641944 | 0/045921755 |
| 742 | 0/001378853 | 0/01024139 | 0/049428217 | **1742** | 0/000817657 | 0/008641944 | 0/045921755 |
| 743 | 0/001378853 | 0/01024139 | 0/049428217 | **1743** | 0/000817657 | 0/008641944 | 0/045921755 |
| 744 | 0/001378853 | 0/01024139 | 0/049428217 | **1744** | 0/000817657 | 0/008641944 | 0/045921755 |
| 745 | 0/001378853 | 0/01024139 | 0/049428217 | **1745** | 0/000817657 | 0/008641944 | 0/045921755 |
| 746 | 0/001378853 | 0/01024139 | 0/049428217 | **1746** | 0/000817657 | 0/008641944 | 0/045921755 |
| 747 | 0/001378853 | 0/01024139 | 0/049428217 | **1747** | 0/000817657 | 0/008641944 | 0/045921755 |
| 748 | 0/001378853 | 0/01024139 | 0/049428217 | **1748** | 0/000817657 | 0/008641944 | 0/045921755 |
| 749 | 0/001378853 | 0/01024139 | 0/049428217 | **1749** | 0/000817657 | 0/008641944 | 0/045921755 |
| 750 | 0/001378853 | 0/01024139 | 0/049428217 | **1750** | 0/000817657 | 0/008641944 | 0/045921755 |
| 751 | 0/001378853 | 0/01024139 | 0/049428217 | **1751** | 0/000817657 | 0/008641944 | 0/045921755 |
| 752 | 0/001378853 | 0/01024139 | 0/049428217 | **1752** | 0/000817657 | 0/008641944 | 0/045921755 |
| 753 | 0/001378853 | 0/01024139 | 0/049428217 | **1753** | 0/000817657 | 0/008641944 | 0/045884395 |
| 754 | 0/001378853 | 0/01024139 | 0/049428217 | **1754** | 0/000817657 | 0/008641944 | 0/045874816 |
| 755 | 0/001378853 | 0/01024139 | 0/049428217 | **1755** | 0/000817657 | 0/008641944 | 0/045874816 |
| 756 | 0/001378853 | 0/01024139 | 0/049428217 | **1756** | 0/000817657 | 0/008641944 | 0/04559324 |
| 757 | 0/001378853 | 0/01024139 | 0/049428217 | **1757** | 0/000817657 | 0/008641944 | 0/04559324 |
| 758 | 0/001378853 | 0/01024139 | 0/049428217 | **1758** | 0/000817657 | 0/008641944 | 0/04559324 |
| 759 | 0/001378853 | 0/01024139 | 0/049428217 | **1759** | 0/000817657 | 0/008641944 | 0/04559324 |
| 760 | 0/001378853 | 0/01024139 | 0/049428217 | **1760** | 0/000817657 | 0/008641944 | 0/04559324 |
| 761 | 0/001378853 | 0/01024139 | 0/049428217 | **1761** | 0/000817657 | 0/008641944 | 0/04559324 |
| 762 | 0/001378853 | 0/01024139 | 0/049428217 | **1762** | 0/000817657 | 0/008641944 | 0/04559324 |
| 763 | 0/001378853 | 0/01024139 | 0/049428217 | **1763** | 0/000817657 | 0/008641944 | 0/04559324 |
| 764 | 0/001378853 | 0/01024139 | 0/049428217 | **1764** | 0/000817657 | 0/008641944 | 0/04559324 |
| 765 | 0/001378853 | 0/01024139 | 0/049428217 | **1765** | 0/000817657 | 0/008641944 | 0/04559324 |
| 766 | 0/001378853 | 0/01024139 | 0/049428217 | **1766** | 0/000817657 | 0/008641944 | 0/04559324 |
| 767 | 0/001378853 | 0/01024139 | 0/049428217 | **1767** | 0/000817657 | 0/008641944 | 0/04559324 |
| 768 | 0/001378853 | 0/01024139 | 0/049428217 | **1768** | 0/000817657 | 0/008641944 | 0/04559324 |
| 769 | 0/001378853 | 0/01024139 | 0/049428217 | **1769** | 0/000817657 | 0/008641944 | 0/045581379 |
| 770 | 0/001378853 | 0/01024139 | 0/049428217 | **1770** | 0/000817657 | 0/008641944 | 0/045581379 |
| 771 | 0/001378853 | 0/01024139 | 0/049428217 | **1771** | 0/000797701 | 0/008641944 | 0/045581379 |
| 772 | 0/001378853 | 0/01024139 | 0/049119162 | **1772** | 0/000797701 | 0/008641944 | 0/045424453 |
| 773 | 0/001378853 | 0/01024139 | 0/049119162 | **1773** | 0/000797701 | 0/008641944 | 0/045424453 |
| 774 | 0/001378853 | 0/01024139 | 0/049119162 | **1774** | 0/000797701 | 0/008641944 | 0/045424453 |
| 775 | 0/001378853 | 0/01024139 | 0/049119162 | **1775** | 0/000797701 | 0/008641944 | 0/045424453 |
| 776 | 0/001378853 | 0/01024139 | 0/049119162 | **1776** | 0/000797701 | 0/008641944 | 0/045424453 |
| 777 | 0/001378853 | 0/01024139 | 0/049119162 | **1777** | 0/000797701 | 0/008641944 | 0/045424453 |
| 778 | 0/001378853 | 0/01024139 | 0/049119162 | **1778** | 0/00074396 | 0/008641944 | 0/045424453 |
| 779 | 0/001378853 | 0/01024139 | 0/049119162 | **1779** | 0/00074396 | 0/008641944 | 0/045424453 |
| 780 | 0/001378853 | 0/01024139 | 0/049119162 | **1780** | 0/00074396 | 0/008641944 | 0/045424453 |
| 781 | 0/001378853 | 0/01024139 | 0/049119162 | **1781** | 0/00074396 | 0/008641944 | 0/045424453 |
| 782 | 0/001378853 | 0/01024139 | 0/049119162 | **1782** | 0/00074396 | 0/008641944 | 0/045424453 |
| 783 | 0/001378853 | 0/01024139 | 0/049119162 | **1783** | 0/00074396 | 0/008641944 | 0/045424453 |
| 784 | 0/001378853 | 0/01024139 | 0/049119162 | **1784** | 0/00074396 | 0/008641944 | 0/045424453 |
| 785 | 0/001378853 | 0/01024139 | 0/049119162 | **1785** | 0/00074396 | 0/008641944 | 0/045424453 |
| 786 | 0/001378853 | 0/01024139 | 0/049119162 | **1786** | 0/00074396 | 0/008641944 | 0/045424453 |
| 787 | 0/001378853 | 0/01024139 | 0/049119162 | **1787** | 0/00074396 | 0/008641944 | 0/045424453 |
| 788 | 0/001378853 | 0/01024139 | 0/049119162 | **1788** | 0/00074396 | 0/008641944 | 0/045424453 |
| 789 | 0/001378853 | 0/01024139 | 0/049119162 | **1789** | 0/00074396 | 0/008641944 | 0/045424453 |
| 790 | 0/001378853 | 0/01024139 | 0/049119162 | **1790** | 0/00074396 | 0/008641944 | 0/045424453 |
| 791 | 0/001378853 | 0/01024139 | 0/049119162 | **1791** | 0/00074396 | 0/008641944 | 0/045424453 |
| 792 | 0/001378853 | 0/01024139 | 0/049119162 | **1792** | 0/00074396 | 0/008641944 | 0/045424453 |
| 793 | 0/001378853 | 0/01024139 | 0/049119162 | **1793** | 0/00074396 | 0/008641944 | 0/045424453 |
| 794 | 0/001378853 | 0/01024139 | 0/049119162 | **1794** | 0/00074396 | 0/008641944 | 0/045424453 |
| 795 | 0/001378853 | 0/01024139 | 0/049119162 | **1795** | 0/00074396 | 0/008641944 | 0/045424453 |
| 796 | 0/001378853 | 0/01024139 | 0/049119162 | **1796** | 0/00074396 | 0/008641944 | 0/045424453 |
| 797 | 0/001378853 | 0/01024139 | 0/049119162 | **1797** | 0/00074396 | 0/008641944 | 0/045424453 |
| 798 | 0/001378853 | 0/01024139 | 0/049119162 | **1798** | 0/00074396 | 0/008641944 | 0/045424453 |
| 799 | 0/001378853 | 0/01024139 | 0/049119162 | **1799** | 0/00074396 | 0/008641944 | 0/045424453 |
| 800 | 0/001378853 | 0/01024139 | 0/049119162 | **1800** | 0/00074396 | 0/008641944 | 0/045424453 |
| 801 | 0/001238633 | 0/01024139 | 0/049119162 | **1801** | 0/00074396 | 0/008641944 | 0/045236006 |
| 802 | 0/001238633 | 0/01024139 | 0/049119162 | **1802** | 0/00074396 | 0/008641944 | 0/045236006 |
| 803 | 0/001238633 | 0/01024139 | 0/049119162 | **1803** | 0/00074396 | 0/008641944 | 0/045236006 |
| 804 | 0/001238633 | 0/01024139 | 0/049119162 | **1804** | 0/00074396 | 0/008641944 | 0/045236006 |
| 805 | 0/001238633 | 0/01024139 | 0/049119162 | **1805** | 0/00074396 | 0/008641944 | 0/045236006 |
| 806 | 0/001238633 | 0/01024139 | 0/049119162 | **1806** | 0/00074396 | 0/008641944 | 0/045236006 |
| 807 | 0/001238633 | 0/01024139 | 0/049119162 | **1807** | 0/00074396 | 0/008641944 | 0/045236006 |
| 808 | 0/001238633 | 0/01024139 | 0/049119162 | **1808** | 0/00074396 | 0/008641944 | 0/045236006 |
| 809 | 0/001238633 | 0/01024139 | 0/049119162 | **1809** | 0/00074396 | 0/008641944 | 0/045236006 |
| 810 | 0/001238633 | 0/01024139 | 0/049119162 | **1810** | 0/00074396 | 0/008641944 | 0/045236006 |
| 811 | 0/001238633 | 0/01024139 | 0/049119162 | **1811** | 0/00074396 | 0/008641944 | 0/045236006 |
| 812 | 0/001238633 | 0/01024139 | 0/049119162 | **1812** | 0/00074396 | 0/008641944 | 0/045236006 |
| 813 | 0/001238633 | 0/01024139 | 0/049119162 | **1813** | 0/00074396 | 0/008641944 | 0/045236006 |
| 814 | 0/001238633 | 0/01024139 | 0/049119162 | **1814** | 0/00074396 | 0/008641944 | 0/045236006 |
| 815 | 0/001238633 | 0/01024139 | 0/049119162 | **1815** | 0/00074396 | 0/008641944 | 0/045236006 |
| 816 | 0/001238633 | 0/01024139 | 0/049119162 | **1816** | 0/00074396 | 0/008641944 | 0/045236006 |
| 817 | 0/001238633 | 0/01024139 | 0/049119162 | **1817** | 0/00074396 | 0/008641944 | 0/045236006 |
| 818 | 0/001238633 | 0/01024139 | 0/049119162 | **1818** | 0/00074396 | 0/008641944 | 0/045236006 |
| 819 | 0/001238633 | 0/01024139 | 0/049119162 | **1819** | 0/00074396 | 0/008641944 | 0/045236006 |
| 820 | 0/001238633 | 0/01024139 | 0/049119162 | **1820** | 0/00074396 | 0/008641944 | 0/045236006 |
| 821 | 0/001238633 | 0/01024139 | 0/049119162 | **1821** | 0/00074396 | 0/008641944 | 0/045236006 |
| 822 | 0/001238633 | 0/01024139 | 0/049119162 | **1822** | 0/00074396 | 0/008641944 | 0/045236006 |
| 823 | 0/001238633 | 0/01024139 | 0/049119162 | **1823** | 0/00074396 | 0/008641944 | 0/045236006 |
| 824 | 0/001238633 | 0/01024139 | 0/049119162 | **1824** | 0/00074396 | 0/008641944 | 0/045236006 |
| 825 | 0/001238633 | 0/01024139 | 0/049119162 | **1825** | 0/00074396 | 0/008641944 | 0/045236006 |
| 826 | 0/001238633 | 0/01024139 | 0/049119162 | **1826** | 0/00074396 | 0/008641944 | 0/045236006 |
| 827 | 0/001238633 | 0/01024139 | 0/049119162 | **1827** | 0/00074396 | 0/008641944 | 0/045236006 |
| 828 | 0/001238633 | 0/01024139 | 0/049119162 | **1828** | 0/00074396 | 0/008641944 | 0/045236006 |
| 829 | 0/001238633 | 0/01024139 | 0/049119162 | **1829** | 0/00074396 | 0/008641944 | 0/045236006 |
| 830 | 0/001238633 | 0/01024139 | 0/049119162 | **1830** | 0/00074396 | 0/008641944 | 0/045236006 |
| 831 | 0/001238633 | 0/01024139 | 0/049119162 | **1831** | 0/00074396 | 0/00863605 | 0/045236006 |
| 832 | 0/001238633 | 0/01024139 | 0/049119162 | **1832** | 0/00074396 | 0/00863605 | 0/045236006 |
| 833 | 0/001238633 | 0/01024139 | 0/049119162 | **1833** | 0/00074396 | 0/00863605 | 0/045236006 |
| 834 | 0/001238633 | 0/01024139 | 0/049119162 | **1834** | 0/00074396 | 0/00863605 | 0/045236006 |
| 835 | 0/001238633 | 0/01024139 | 0/049119162 | **1835** | 0/00074396 | 0/00863605 | 0/045177308 |
| 836 | 0/001238633 | 0/01024139 | 0/049119162 | **1836** | 0/00074396 | 0/00863605 | 0/045177308 |
| 837 | 0/001238633 | 0/01024139 | 0/049119162 | **1837** | 0/00074396 | 0/00863605 | 0/045177308 |
| 838 | 0/001238633 | 0/01024139 | 0/049119162 | **1838** | 0/00074396 | 0/00863605 | 0/045177308 |
| 839 | 0/001238633 | 0/01024139 | 0/049119162 | **1839** | 0/00074396 | 0/00863605 | 0/045177308 |
| 840 | 0/001238633 | 0/01024139 | 0/049119162 | **1840** | 0/00074396 | 0/00863605 | 0/045177308 |
| 841 | 0/001238633 | 0/01024139 | 0/049119162 | **1841** | 0/00074396 | 0/00863605 | 0/045177308 |
| 842 | 0/001238633 | 0/01024139 | 0/049119162 | **1842** | 0/00074396 | 0/00863605 | 0/045177308 |
| 843 | 0/001238633 | 0/01024139 | 0/049119162 | **1843** | 0/00074396 | 0/00863605 | 0/045097134 |
| 844 | 0/001238633 | 0/01024139 | 0/049119162 | **1844** | 0/00074396 | 0/00863605 | 0/045097134 |
| 845 | 0/001238633 | 0/01024139 | 0/049119162 | **1845** | 0/00074396 | 0/00863605 | 0/045097134 |
| 846 | 0/001238633 | 0/01024139 | 0/049119162 | **1846** | 0/00074396 | 0/00863605 | 0/045097134 |
| 847 | 0/001238633 | 0/01024139 | 0/049119162 | **1847** | 0/00074396 | 0/00863605 | 0/045097134 |
| 848 | 0/001238633 | 0/01024139 | 0/049119162 | **1848** | 0/00074396 | 0/00863605 | 0/045097134 |
| 849 | 0/001238633 | 0/01024139 | 0/049119162 | **1849** | 0/00074396 | 0/008623749 | 0/045063264 |
| 850 | 0/001238633 | 0/01024139 | 0/049119162 | **1850** | 0/00074396 | 0/008623749 | 0/045063264 |
| 851 | 0/001238633 | 0/01024139 | 0/049119162 | **1851** | 0/00074396 | 0/008623749 | 0/045063264 |
| 852 | 0/001238633 | 0/01024139 | 0/049119162 | **1852** | 0/00074396 | 0/008623749 | 0/045063264 |
| 853 | 0/001238633 | 0/01024139 | 0/049119162 | **1853** | 0/00074396 | 0/008623749 | 0/045063264 |
| 854 | 0/001238633 | 0/01024139 | 0/049119162 | **1854** | 0/00074396 | 0/008623749 | 0/045063264 |
| 855 | 0/001238633 | 0/01024139 | 0/049119162 | **1855** | 0/00074396 | 0/008623749 | 0/045063264 |
| 856 | 0/001238633 | 0/01024139 | 0/049119162 | **1856** | 0/00074396 | 0/008623749 | 0/045063264 |
| 857 | 0/001238633 | 0/01024139 | 0/049119162 | **1857** | 0/00074396 | 0/008623749 | 0/045063264 |
| 858 | 0/001238633 | 0/01024139 | 0/049119162 | **1858** | 0/00074396 | 0/008623749 | 0/045008501 |
| 859 | 0/001238633 | 0/01024139 | 0/049119162 | **1859** | 0/00074396 | 0/008623749 | 0/045008501 |
| 860 | 0/001238633 | 0/01024139 | 0/049119162 | **1860** | 0/00074396 | 0/008623749 | 0/045008501 |
| 861 | 0/001238633 | 0/01024139 | 0/049119162 | **1861** | 0/00074396 | 0/008598733 | 0/045008501 |
| 862 | 0/001238633 | 0/01024139 | 0/049119162 | **1862** | 0/00074396 | 0/008598733 | 0/045000285 |
| 863 | 0/001238633 | 0/01024139 | 0/049119162 | **1863** | 0/00074396 | 0/008598733 | 0/045000285 |
| 864 | 0/001238633 | 0/01024139 | 0/049119162 | **1864** | 0/00074396 | 0/008598733 | 0/045000285 |
| 865 | 0/001238633 | 0/01024139 | 0/049119162 | **1865** | 0/00074396 | 0/008598733 | 0/045000285 |
| 866 | 0/001238633 | 0/01024139 | 0/049119162 | **1866** | 0/00074396 | 0/008598733 | 0/045000285 |
| 867 | 0/001238633 | 0/01024139 | 0/049119162 | **1867** | 0/00074396 | 0/008598733 | 0/045000285 |
| 868 | 0/001238633 | 0/01024139 | 0/049119162 | **1868** | 0/00074396 | 0/008598733 | 0/045000285 |
| 869 | 0/001238633 | 0/01024139 | 0/049119162 | **1869** | 0/00074396 | 0/008598733 | 0/045000285 |
| 870 | 0/001238633 | 0/01024139 | 0/049119162 | **1870** | 0/00074396 | 0/008598733 | 0/045000285 |
| 871 | 0/001238633 | 0/01024139 | 0/049119162 | **1871** | 0/00074396 | 0/008598733 | 0/045000285 |
| 872 | 0/001238633 | 0/01024139 | 0/049119162 | **1872** | 0/00074396 | 0/008598733 | 0/045000285 |
| 873 | 0/001238633 | 0/01024139 | 0/049119162 | **1873** | 0/00074396 | 0/008598733 | 0/045000285 |
| 874 | 0/001238633 | 0/01024139 | 0/049119162 | **1874** | 0/00074396 | 0/008598733 | 0/045000285 |
| 875 | 0/001238633 | 0/01024139 | 0/049119162 | **1875** | 0/00074396 | 0/008598733 | 0/045000285 |
| 876 | 0/001238633 | 0/01024139 | 0/049119162 | **1876** | 0/00074396 | 0/008598733 | 0/045000285 |
| 877 | 0/001238633 | 0/01024139 | 0/049119162 | **1877** | 0/00074396 | 0/008598733 | 0/045000285 |
| 878 | 0/001238633 | 0/01024139 | 0/049119162 | **1878** | 0/00074396 | 0/008598733 | 0/045000285 |
| 879 | 0/001238633 | 0/01024139 | 0/049119162 | **1879** | 0/00074396 | 0/008598733 | 0/045000285 |
| 880 | 0/001238633 | 0/01024139 | 0/049119162 | **1880** | 0/00074396 | 0/008598733 | 0/045000285 |
| 881 | 0/001238633 | 0/01024139 | 0/049119162 | **1881** | 0/00074396 | 0/008598733 | 0/045000285 |
| 882 | 0/001238633 | 0/01024139 | 0/049119162 | **1882** | 0/00074396 | 0/008598733 | 0/045000285 |
| 883 | 0/001238633 | 0/01024139 | 0/049119162 | **1883** | 0/00074396 | 0/008598733 | 0/045000285 |
| 884 | 0/001238633 | 0/01024139 | 0/049119162 | **1884** | 0/00074396 | 0/008598733 | 0/045000285 |
| 885 | 0/001238633 | 0/01024139 | 0/049119162 | **1885** | 0/00074396 | 0/008598733 | 0/045000285 |
| 886 | 0/001238633 | 0/01024139 | 0/049119162 | **1886** | 0/00074396 | 0/008598733 | 0/045000285 |
| 887 | 0/001238633 | 0/01024139 | 0/049119162 | **1887** | 0/00074396 | 0/008598733 | 0/045000285 |
| 888 | 0/001238633 | 0/01024139 | 0/049119162 | **1888** | 0/00074396 | 0/008598733 | 0/045000285 |
| 889 | 0/001238633 | 0/01024139 | 0/049119162 | **1889** | 0/00074396 | 0/008598733 | 0/045000285 |
| 890 | 0/001238633 | 0/01024139 | 0/049119162 | **1890** | 0/00074396 | 0/008588541 | 0/045000285 |
| 891 | 0/001238633 | 0/01024139 | 0/049119162 | **1891** | 0/00074396 | 0/008588541 | 0/045000285 |
| 892 | 0/001238633 | 0/01024139 | 0/049119162 | **1892** | 0/00074396 | 0/008588541 | 0/045000285 |
| 893 | 0/001238633 | 0/01024139 | 0/049119162 | **1893** | 0/00074396 | 0/008588541 | 0/045000285 |
| 894 | 0/001238633 | 0/01024139 | 0/049119162 | **1894** | 0/00074396 | 0/008588541 | 0/045000285 |
| 895 | 0/001238633 | 0/01024139 | 0/049119162 | **1895** | 0/00074396 | 0/008583108 | 0/045000285 |
| 896 | 0/001238633 | 0/01024139 | 0/049119162 | **1896** | 0/00074396 | 0/008583108 | 0/045000285 |
| 897 | 0/001238633 | 0/01024139 | 0/049119162 | **1897** | 0/00074396 | 0/008583108 | 0/045000285 |
| 898 | 0/001228287 | 0/01024139 | 0/049119162 | **1898** | 0/00074396 | 0/008583108 | 0/045000285 |
| 899 | 0/001228287 | 0/01024139 | 0/049119162 | **1899** | 0/00074396 | 0/008583108 | 0/045000285 |
| 900 | 0/001228287 | 0/01024139 | 0/049119162 | **1900** | 0/00074396 | 0/008583108 | 0/045000285 |
| 901 | 0/001228287 | 0/01024139 | 0/049119162 | **1901** | 0/00074396 | 0/008583108 | 0/045000285 |
| 902 | 0/001228287 | 0/01024139 | 0/049119162 | **1902** | 0/00074396 | 0/008583108 | 0/045000285 |
| 903 | 0/001228287 | 0/01024139 | 0/049119162 | **1903** | 0/00074396 | 0/008583108 | 0/045000285 |
| 904 | 0/001228287 | 0/01024139 | 0/049119162 | **1904** | 0/00074396 | 0/008583108 | 0/045000285 |
| 905 | 0/001228287 | 0/01024139 | 0/049119162 | **1905** | 0/00074396 | 0/008583108 | 0/045000285 |
| 906 | 0/001228287 | 0/01024139 | 0/049119162 | **1906** | 0/00074396 | 0/008583108 | 0/045000285 |
| 907 | 0/001228287 | 0/01024139 | 0/049119162 | **1907** | 0/00074396 | 0/008583108 | 0/045000285 |
| 908 | 0/001228287 | 0/01024139 | 0/049119162 | **1908** | 0/00074396 | 0/00857952 | 0/045000285 |
| 909 | 0/001228287 | 0/01024139 | 0/049119162 | **1909** | 0/00074396 | 0/00857952 | 0/045000285 |
| 910 | 0/001228287 | 0/01024139 | 0/049119162 | **1910** | 0/00074396 | 0/008579159 | 0/045000285 |
| 911 | 0/001228287 | 0/01024139 | 0/049119162 | **1911** | 0/00074396 | 0/008579159 | 0/045000285 |
| 912 | 0/001228287 | 0/01024139 | 0/049119162 | **1912** | 0/00074396 | 0/008579159 | 0/045000285 |
| 913 | 0/001228287 | 0/01024139 | 0/049119162 | **1913** | 0/00074396 | 0/008579159 | 0/045000285 |
| 914 | 0/001228287 | 0/01024139 | 0/049119162 | **1914** | 0/00074396 | 0/008579159 | 0/045000285 |
| 915 | 0/001228287 | 0/01024139 | 0/049119162 | **1915** | 0/00074396 | 0/008579159 | 0/045000285 |
| 916 | 0/001228287 | 0/01024139 | 0/049119162 | **1916** | 0/00074396 | 0/008579159 | 0/045000285 |
| 917 | 0/001228287 | 0/01024139 | 0/049119162 | **1917** | 0/00074396 | 0/008579159 | 0/045000285 |
| 918 | 0/001228287 | 0/01024139 | 0/049119162 | **1918** | 0/00074396 | 0/008579159 | 0/045000285 |
| 919 | 0/001031817 | 0/01024139 | 0/049119162 | **1919** | 0/00074396 | 0/008579159 | 0/044967057 |
| 920 | 0/001031817 | 0/01024139 | 0/049119162 | **1920** | 0/00074396 | 0/008579159 | 0/044967057 |
| 921 | 0/001031817 | 0/01024139 | 0/049119162 | **1921** | 0/00074396 | 0/008556779 | 0/044967057 |
| 922 | 0/001031817 | 0/01024139 | 0/049119162 | **1922** | 0/00074396 | 0/008556779 | 0/044967057 |
| 923 | 0/001031817 | 0/01024139 | 0/049119162 | **1923** | 0/00074396 | 0/008556779 | 0/044967057 |
| 924 | 0/001031817 | 0/01024139 | 0/049119162 | **1924** | 0/00074396 | 0/008556779 | 0/044967057 |
| 925 | 0/001031817 | 0/01024139 | 0/049119162 | **1925** | 0/00074396 | 0/008556779 | 0/044967057 |
| 926 | 0/001031817 | 0/01024139 | 0/049119162 | **1926** | 0/00074396 | 0/008556779 | 0/044967057 |
| 927 | 0/001031817 | 0/01024139 | 0/049119162 | **1927** | 0/00074396 | 0/008556779 | 0/044967057 |
| 928 | 0/001031817 | 0/01024139 | 0/049119162 | **1928** | 0/00074396 | 0/008556779 | 0/044967057 |
| 929 | 0/001031817 | 0/01024139 | 0/049119162 | **1929** | 0/00074396 | 0/008556779 | 0/044967057 |
| 930 | 0/001031817 | 0/01024139 | 0/049119162 | **1930** | 0/00074396 | 0/008556779 | 0/044967057 |
| 931 | 0/001031817 | 0/01024139 | 0/049119162 | **1931** | 0/00074396 | 0/008556779 | 0/044967057 |
| 932 | 0/001031817 | 0/01024139 | 0/049119162 | **1932** | 0/00074396 | 0/00854856 | 0/044967057 |
| 933 | 0/001031817 | 0/01024139 | 0/049119162 | **1933** | 0/00074396 | 0/00854856 | 0/044967057 |
| 934 | 0/001031817 | 0/01024139 | 0/049119162 | **1934** | 0/00074396 | 0/00854856 | 0/044967057 |
| 935 | 0/001031817 | 0/01024139 | 0/049119162 | **1935** | 0/00074396 | 0/00854856 | 0/044967057 |
| 936 | 0/001031817 | 0/01024139 | 0/049119162 | **1936** | 0/00074396 | 0/00854856 | 0/044967057 |
| 937 | 0/001031817 | 0/01024139 | 0/049119162 | **1937** | 0/00074396 | 0/00853718 | 0/044967057 |
| 938 | 0/001031817 | 0/01024139 | 0/049119162 | **1938** | 0/00074396 | 0/00853718 | 0/044967057 |
| 939 | 0/001031817 | 0/01024139 | 0/049119162 | **1939** | 0/00074396 | 0/00853718 | 0/044967057 |
| 940 | 0/001031817 | 0/01024139 | 0/049119162 | **1940** | 0/00074396 | 0/00853718 | 0/044967057 |
| 941 | 0/001031817 | 0/01024139 | 0/049119162 | **1941** | 0/00074396 | 0/00853718 | 0/044967057 |
| 942 | 0/001031817 | 0/01024139 | 0/049119162 | **1942** | 0/00074396 | 0/00853718 | 0/044967057 |
| 943 | 0/001031817 | 0/01024139 | 0/049119162 | **1943** | 0/00074396 | 0/00853718 | 0/044967057 |
| 944 | 0/001031817 | 0/01003243 | 0/049119162 | **1944** | 0/00074396 | 0/008529911 | 0/044967057 |
| 945 | 0/001031817 | 0/01003243 | 0/049119162 | **1945** | 0/00074396 | 0/008529911 | 0/044967057 |
| 946 | 0/001031817 | 0/01003243 | 0/049119162 | **1946** | 0/000739518 | 0/008529911 | 0/044967057 |
| 947 | 0/001031817 | 0/01003243 | 0/049119162 | **1947** | 0/000739518 | 0/008529911 | 0/044967057 |
| 948 | 0/001031817 | 0/01003243 | 0/049119162 | **1948** | 0/000739518 | 0/008529911 | 0/044967057 |
| 949 | 0/001031817 | 0/01003243 | 0/049119162 | **1949** | 0/000739518 | 0/008529911 | 0/044967057 |
| 950 | 0/001031817 | 0/01003243 | 0/049119162 | **1950** | 0/000739518 | 0/008529911 | 0/044967057 |
| 951 | 0/001031817 | 0/01003243 | 0/049119162 | **1951** | 0/000739518 | 0/008529911 | 0/044967057 |
| 952 | 0/001031817 | 0/01003243 | 0/049119162 | **1952** | 0/000739518 | 0/008529911 | 0/044967057 |
| 953 | 0/001031817 | 0/01003243 | 0/049119162 | **1953** | 0/000739518 | 0/008529911 | 0/044967057 |
| 954 | 0/001031817 | 0/01003243 | 0/049119162 | **1954** | 0/000739518 | 0/008529911 | 0/044967057 |
| 955 | 0/001031817 | 0/01003243 | 0/049119162 | **1955** | 0/000739518 | 0/008529911 | 0/044967057 |
| 956 | 0/001031817 | 0/01003243 | 0/049119162 | **1956** | 0/000739518 | 0/008529911 | 0/044967057 |
| 957 | 0/001031817 | 0/01003243 | 0/049119162 | **1957** | 0/000739518 | 0/008529911 | 0/044967057 |
| 958 | 0/001031817 | 0/01003243 | 0/049119162 | **1958** | 0/000739518 | 0/008523731 | 0/044967057 |
| 959 | 0/001031817 | 0/01003243 | 0/049119162 | **1959** | 0/000733988 | 0/008523731 | 0/044937339 |
| 960 | 0/000991607 | 0/01003243 | 0/049119162 | **1960** | 0/000733988 | 0/008523731 | 0/044937339 |
| 961 | 0/000991607 | 0/01003243 | 0/049119162 | **1961** | 0/000733988 | 0/008523731 | 0/044918191 |
| 962 | 0/000991607 | 0/01003243 | 0/049119162 | **1962** | 0/000733988 | 0/008523731 | 0/044918191 |
| 963 | 0/000991607 | 0/01003243 | 0/049119162 | **1963** | 0/000733988 | 0/008523731 | 0/044918191 |
| 964 | 0/000991607 | 0/009966809 | 0/049119162 | **1964** | 0/000733988 | 0/008518733 | 0/044918191 |
| 965 | 0/000991607 | 0/009966809 | 0/049119162 | **1965** | 0/000733988 | 0/008518733 | 0/044918191 |
| 966 | 0/000991607 | 0/009966809 | 0/049119162 | **1966** | 0/000733988 | 0/008518733 | 0/044918191 |
| 967 | 0/000991607 | 0/009966809 | 0/049119162 | **1967** | 0/000733988 | 0/008518733 | 0/044918191 |
| 968 | 0/000991607 | 0/009966809 | 0/049119162 | **1968** | 0/000733988 | 0/008518733 | 0/044891813 |
| 969 | 0/000991607 | 0/009966809 | 0/049119162 | **1969** | 0/000733988 | 0/008518733 | 0/044891813 |
| 970 | 0/000991607 | 0/009966809 | 0/049119162 | **1970** | 0/000733988 | 0/008518733 | 0/044891813 |
| 971 | 0/000991607 | 0/009966809 | 0/049119162 | **1971** | 0/000733988 | 0/008514237 | 0/044891813 |
| 972 | 0/000991607 | 0/009966809 | 0/049119162 | **1972** | 0/000733988 | 0/008514237 | 0/044891813 |
| 973 | 0/000991607 | 0/009966809 | 0/049119162 | **1973** | 0/000733988 | 0/008514237 | 0/044891813 |
| 974 | 0/000991607 | 0/009966809 | 0/049119162 | **1974** | 0/000733988 | 0/008514237 | 0/044890916 |
| 975 | 0/000991607 | 0/009966809 | 0/049119162 | **1975** | 0/000733988 | 0/008514237 | 0/044890916 |
| 976 | 0/000991607 | 0/009966809 | 0/049119162 | **1976** | 0/000733988 | 0/008514237 | 0/044890916 |
| 977 | 0/000991607 | 0/009966809 | 0/049119162 | **1977** | 0/000733988 | 0/008514237 | 0/044890916 |
| 978 | 0/000991607 | 0/009966809 | 0/049119162 | **1978** | 0/000733988 | 0/008514237 | 0/044890916 |
| 979 | 0/000991607 | 0/009966809 | 0/049119162 | **1979** | 0/000733988 | 0/008514237 | 0/044890916 |
| 980 | 0/000991607 | 0/009966809 | 0/049119162 | **1980** | 0/000733988 | 0/008514237 | 0/044890916 |
| 981 | 0/000991607 | 0/009966809 | 0/049119162 | **1981** | 0/000733988 | 0/008514007 | 0/044890916 |
| 982 | 0/000991607 | 0/009966809 | 0/049119162 | **1982** | 0/000733988 | 0/008514007 | 0/044890916 |
| 983 | 0/000991607 | 0/009966809 | 0/049119162 | **1983** | 0/000733988 | 0/008514007 | 0/044890916 |
| 984 | 0/000991607 | 0/009966809 | 0/049119162 | **1984** | 0/000733988 | 0/008514007 | 0/044890916 |
| 985 | 0/000984282 | 0/009966809 | 0/049119162 | **1985** | 0/000733988 | 0/008513405 | 0/044886477 |
| 986 | 0/000984282 | 0/009966809 | 0/049119162 | **1986** | 0/000733988 | 0/008506102 | 0/044880376 |
| 987 | 0/000984282 | 0/009966809 | 0/049119162 | **1987** | 0/000733988 | 0/008506102 | 0/044880376 |
| 988 | 0/000984282 | 0/009966809 | 0/049119162 | **1988** | 0/000733988 | 0/008504402 | 0/044880376 |
| 989 | 0/000984282 | 0/009966809 | 0/049119162 | **1989** | 0/000733988 | 0/008504402 | 0/044879393 |
| 990 | 0/000984282 | 0/009966809 | 0/049119162 | **1990** | 0/000733988 | 0/008504402 | 0/04486531 |
| 991 | 0/000984282 | 0/009966809 | 0/049119162 | **1991** | 0/000730354 | 0/008504402 | 0/04486531 |
| 992 | 0/000984282 | 0/009966809 | 0/049119162 | **1992** | 0/000730354 | 0/008501748 | 0/04486531 |
| 993 | 0/000984282 | 0/009966809 | 0/049119162 | **1993** | 0/000730354 | 0/008501748 | 0/044856841 |
| 994 | 0/000984282 | 0/009966809 | 0/049119162 | **1994** | 0/000730354 | 0/008499691 | 0/044856841 |
| 995 | 0/000984282 | 0/009966809 | 0/049119162 | **1995** | 0/000730354 | 0/008499691 | 0/044856841 |
| 996 | 0/000984282 | 0/009966809 | 0/049119162 | **1996** | 0/000730354 | 0/008497278 | 0/044856841 |
| 997 | 0/000984282 | 0/009966809 | 0/049119162 | **1997** | 0/000728799 | 0/008497278 | 0/044852907 |
| 998 | 0/000984282 | 0/009966809 | 0/049119162 | **1998** | 0/000728799 | 0/008497278 | 0/044850712 |
| 999 | 0/000984282 | 0/009966809 | 0/049119162 | **1999** | 0/000728799 | 0/008495619 | 0/044849062 |
| 1000 | 0/000984282 | 0/009966809 | 0/049119162 | **2000** | 0/000728799 | 0/008495136 | 0/044846952 |

Table 16. Cost function convergence for Damage Scenario 2 under varying noise levels - WOA.

| Iterations | 0% Noise | 3% Noise | 10% Noise | Iterations | 0% Noise | 3% Noise | 10% Noise |
| --- | --- | --- | --- | --- | --- | --- | --- |
| 1 | 0/231851098 | 0/225102564 | 0/115280061 | **1001** | 0/008844759 | 0/019967557 | 0/033344687 |
| 2 | 0/187051338 | 0/120723005 | 0/115280061 | **1002** | 0/008844759 | 0/019967557 | 0/033344687 |
| 3 | 0/139337919 | 0/113669784 | 0/091468547 | **1003** | 0/008844759 | 0/019967557 | 0/033344687 |
| 4 | 0/097892272 | 0/095992811 | 0/091468547 | **1004** | 0/008844759 | 0/019967557 | 0/033344687 |
| 5 | 0/083245076 | 0/066943431 | 0/074111705 | **1005** | 0/008844759 | 0/019967557 | 0/033344687 |
| 6 | 0/069961082 | 0/065545919 | 0/072271783 | **1006** | 0/008844759 | 0/019967557 | 0/033344687 |
| 7 | 0/069961082 | 0/065545919 | 0/071417068 | **1007** | 0/008844759 | 0/019374836 | 0/033344687 |
| 8 | 0/064389907 | 0/050790412 | 0/071417068 | **1008** | 0/008844759 | 0/019374836 | 0/033344687 |
| 9 | 0/05349541 | 0/045595598 | 0/071417068 | **1009** | 0/008844759 | 0/019374836 | 0/033344687 |
| 10 | 0/05349541 | 0/039593053 | 0/067045628 | **1010** | 0/008844759 | 0/019374836 | 0/033344687 |
| 11 | 0/043852583 | 0/039254346 | 0/067045628 | **1011** | 0/008844759 | 0/019374836 | 0/033344687 |
| 12 | 0/040913832 | 0/039254346 | 0/062729702 | **1012** | 0/008844759 | 0/019374836 | 0/033344687 |
| 13 | 0/040913832 | 0/039254346 | 0/062729702 | **1013** | 0/008844759 | 0/019374836 | 0/033344687 |
| 14 | 0/033050073 | 0/036281563 | 0/062729702 | **1014** | 0/008844759 | 0/019374836 | 0/033344687 |
| 15 | 0/031164056 | 0/036281563 | 0/062729702 | **1015** | 0/008844759 | 0/019374836 | 0/033344687 |
| 16 | 0/03007415 | 0/036281563 | 0/049223767 | **1016** | 0/008844759 | 0/019374836 | 0/033344687 |
| 17 | 0/03007415 | 0/036281563 | 0/049223767 | **1017** | 0/008844759 | 0/019374836 | 0/033344687 |
| 18 | 0/027532072 | 0/036281563 | 0/049223767 | **1018** | 0/008844759 | 0/019374836 | 0/033344687 |
| 19 | 0/024797032 | 0/033626025 | 0/049223767 | **1019** | 0/008844759 | 0/019374836 | 0/033344687 |
| 20 | 0/022693227 | 0/033626025 | 0/049223767 | **1020** | 0/008844759 | 0/019374836 | 0/033344687 |
| 21 | 0/022693227 | 0/033626025 | 0/049223767 | **1021** | 0/008844759 | 0/019374836 | 0/033344687 |
| 22 | 0/022693227 | 0/033626025 | 0/049223767 | **1022** | 0/008844759 | 0/019374836 | 0/033344687 |
| 23 | 0/022693227 | 0/033626025 | 0/049223767 | **1023** | 0/008844759 | 0/019374836 | 0/033344687 |
| 24 | 0/015956947 | 0/033626025 | 0/049223767 | **1024** | 0/008844759 | 0/019374836 | 0/033344687 |
| 25 | 0/015956947 | 0/033626025 | 0/049223767 | **1025** | 0/008844759 | 0/019374836 | 0/033344687 |
| 26 | 0/015956947 | 0/033626025 | 0/049223767 | **1026** | 0/008844759 | 0/019374836 | 0/033344687 |
| 27 | 0/015956947 | 0/033626025 | 0/049223767 | **1027** | 0/008844759 | 0/019374836 | 0/033344687 |
| 28 | 0/015956947 | 0/033626025 | 0/049223767 | **1028** | 0/008844759 | 0/019374836 | 0/033344687 |
| 29 | 0/015956947 | 0/033626025 | 0/049223767 | **1029** | 0/008844759 | 0/019374836 | 0/033344687 |
| 30 | 0/015956947 | 0/033626025 | 0/049223767 | **1030** | 0/008844759 | 0/019374836 | 0/033344687 |
| 31 | 0/015956947 | 0/033626025 | 0/049223767 | **1031** | 0/008844759 | 0/019374836 | 0/033344687 |
| 32 | 0/015956947 | 0/033626025 | 0/049223767 | **1032** | 0/008844759 | 0/019374836 | 0/033344687 |
| 33 | 0/015956947 | 0/033626025 | 0/049223767 | **1033** | 0/008844759 | 0/019374836 | 0/033344687 |
| 34 | 0/015956947 | 0/033626025 | 0/049223767 | **1034** | 0/008844759 | 0/019374836 | 0/033344687 |
| 35 | 0/015956947 | 0/033626025 | 0/049223767 | **1035** | 0/008844759 | 0/019374836 | 0/033344687 |
| 36 | 0/015956947 | 0/033626025 | 0/049223767 | **1036** | 0/008844759 | 0/019374836 | 0/033344687 |
| 37 | 0/015956947 | 0/033626025 | 0/049223767 | **1037** | 0/008844759 | 0/019374836 | 0/033344687 |
| 38 | 0/015956947 | 0/033626025 | 0/049223767 | **1038** | 0/008844759 | 0/019374836 | 0/033344687 |
| 39 | 0/015500929 | 0/032688528 | 0/049223767 | **1039** | 0/008844759 | 0/019374836 | 0/033344687 |
| 40 | 0/013601768 | 0/032688528 | 0/049223767 | **1040** | 0/008844759 | 0/019374836 | 0/033344687 |
| 41 | 0/013601768 | 0/032688528 | 0/049223767 | **1041** | 0/008844759 | 0/019374836 | 0/033344687 |
| 42 | 0/013601768 | 0/032688528 | 0/049223767 | **1042** | 0/008844759 | 0/019374836 | 0/033344687 |
| 43 | 0/013601768 | 0/032688528 | 0/049223767 | **1043** | 0/008844759 | 0/019374836 | 0/033344687 |
| 44 | 0/013601768 | 0/032688528 | 0/049223767 | **1044** | 0/008844759 | 0/019374836 | 0/033344687 |
| 45 | 0/013601768 | 0/032688528 | 0/049223767 | **1045** | 0/008844759 | 0/019374836 | 0/033344687 |
| 46 | 0/013601768 | 0/032688528 | 0/049223767 | **1046** | 0/008844759 | 0/019374836 | 0/033344687 |
| 47 | 0/013601768 | 0/032688528 | 0/049223767 | **1047** | 0/008844759 | 0/019374836 | 0/033344687 |
| 48 | 0/013601768 | 0/0326836 | 0/049223767 | **1048** | 0/008844759 | 0/019374836 | 0/033344687 |
| 49 | 0/013601768 | 0/0326836 | 0/049223767 | **1049** | 0/008844759 | 0/019374836 | 0/033344687 |
| 50 | 0/013601768 | 0/0326836 | 0/049223767 | **1050** | 0/008844759 | 0/019374836 | 0/033344687 |
| 51 | 0/013601768 | 0/0326836 | 0/049223767 | **1051** | 0/008844759 | 0/019374836 | 0/033344687 |
| 52 | 0/013601768 | 0/0326836 | 0/049223767 | **1052** | 0/008844759 | 0/019374836 | 0/033344687 |
| 53 | 0/013601768 | 0/0326836 | 0/049223767 | **1053** | 0/008844759 | 0/019374836 | 0/033344687 |
| 54 | 0/013601768 | 0/0326836 | 0/049223767 | **1054** | 0/008844759 | 0/019374836 | 0/033344687 |
| 55 | 0/013601768 | 0/0326836 | 0/047113828 | **1055** | 0/008844759 | 0/019374836 | 0/033344687 |
| 56 | 0/013601768 | 0/0326836 | 0/047113828 | **1056** | 0/008844759 | 0/019374836 | 0/033344687 |
| 57 | 0/013601768 | 0/0326836 | 0/047113828 | **1057** | 0/008844759 | 0/019374836 | 0/033344687 |
| 58 | 0/013601768 | 0/0326836 | 0/047113828 | **1058** | 0/008844759 | 0/019374836 | 0/033344687 |
| 59 | 0/013601768 | 0/0326836 | 0/047113828 | **1059** | 0/008844759 | 0/019374836 | 0/033344687 |
| 60 | 0/013601768 | 0/0326836 | 0/047113828 | **1060** | 0/008844759 | 0/019374836 | 0/033344687 |
| 61 | 0/013601768 | 0/031919455 | 0/047113828 | **1061** | 0/008844759 | 0/019374836 | 0/033344687 |
| 62 | 0/013601768 | 0/031919455 | 0/047113828 | **1062** | 0/008844759 | 0/019374836 | 0/033344687 |
| 63 | 0/013601768 | 0/031919455 | 0/047113828 | **1063** | 0/008844759 | 0/019374836 | 0/033344687 |
| 64 | 0/013601768 | 0/031919455 | 0/047113828 | **1064** | 0/008844759 | 0/019374836 | 0/033344687 |
| 65 | 0/013601768 | 0/031919455 | 0/047113828 | **1065** | 0/008844759 | 0/019374836 | 0/033344687 |
| 66 | 0/013601768 | 0/031919455 | 0/047113828 | **1066** | 0/008844759 | 0/019374836 | 0/033344687 |
| 67 | 0/013601768 | 0/030467658 | 0/047113828 | **1067** | 0/008844759 | 0/019374836 | 0/033344687 |
| 68 | 0/013601768 | 0/030467658 | 0/047113828 | **1068** | 0/008844759 | 0/019374836 | 0/033344687 |
| 69 | 0/013601768 | 0/030467658 | 0/047113828 | **1069** | 0/008844759 | 0/019374836 | 0/033344687 |
| 70 | 0/013601768 | 0/030467658 | 0/047113828 | **1070** | 0/008844759 | 0/019374836 | 0/033344687 |
| 71 | 0/013601768 | 0/030467658 | 0/047113828 | **1071** | 0/008844759 | 0/019374836 | 0/033344687 |
| 72 | 0/013601768 | 0/030467658 | 0/047113828 | **1072** | 0/008844759 | 0/019374836 | 0/033344687 |
| 73 | 0/013601768 | 0/030467658 | 0/047113828 | **1073** | 0/008844759 | 0/019374836 | 0/033344687 |
| 74 | 0/013601768 | 0/030467658 | 0/047113828 | **1074** | 0/008844759 | 0/019374836 | 0/033344687 |
| 75 | 0/013601768 | 0/030467658 | 0/047113828 | **1075** | 0/008844759 | 0/019374836 | 0/033344687 |
| 76 | 0/013601768 | 0/030467658 | 0/047113828 | **1076** | 0/008844759 | 0/019374836 | 0/033344687 |
| 77 | 0/013601768 | 0/030467658 | 0/047113828 | **1077** | 0/008844759 | 0/019374836 | 0/033344687 |
| 78 | 0/013601768 | 0/026864937 | 0/047113828 | **1078** | 0/008844759 | 0/019374836 | 0/033344687 |
| 79 | 0/013601768 | 0/026864937 | 0/047113828 | **1079** | 0/008844759 | 0/019374836 | 0/033344687 |
| 80 | 0/013601768 | 0/026864937 | 0/047113828 | **1080** | 0/008844759 | 0/019029198 | 0/033344687 |
| 81 | 0/013601768 | 0/026864937 | 0/047113828 | **1081** | 0/008844759 | 0/019029198 | 0/033344687 |
| 82 | 0/013601768 | 0/026864937 | 0/047113828 | **1082** | 0/008844759 | 0/019029198 | 0/033344687 |
| 83 | 0/013601768 | 0/026864937 | 0/047113828 | **1083** | 0/008844759 | 0/019029198 | 0/033344687 |
| 84 | 0/013601768 | 0/026864937 | 0/047113828 | **1084** | 0/008844759 | 0/019029198 | 0/033344687 |
| 85 | 0/013601768 | 0/026864937 | 0/047113828 | **1085** | 0/008844759 | 0/019029198 | 0/033344687 |
| 86 | 0/013601768 | 0/026864937 | 0/047113828 | **1086** | 0/008844759 | 0/019029198 | 0/033344687 |
| 87 | 0/013601768 | 0/026864937 | 0/047113828 | **1087** | 0/008844759 | 0/019029198 | 0/033344687 |
| 88 | 0/013601768 | 0/026864937 | 0/047113828 | **1088** | 0/008844759 | 0/019029198 | 0/033344687 |
| 89 | 0/013601768 | 0/026864937 | 0/043588138 | **1089** | 0/008844759 | 0/019029198 | 0/033344687 |
| 90 | 0/013601768 | 0/026864937 | 0/043588138 | **1090** | 0/008844759 | 0/019029198 | 0/033344687 |
| 91 | 0/013601768 | 0/026864937 | 0/043588138 | **1091** | 0/008844759 | 0/019029198 | 0/033344687 |
| 92 | 0/013601768 | 0/026864937 | 0/043588138 | **1092** | 0/008844759 | 0/019029198 | 0/033344687 |
| 93 | 0/013601768 | 0/026864937 | 0/043588138 | **1093** | 0/008844759 | 0/019029198 | 0/033344687 |
| 94 | 0/013601768 | 0/026864937 | 0/043588138 | **1094** | 0/008844759 | 0/019029198 | 0/033344687 |
| 95 | 0/013601768 | 0/026864937 | 0/043588138 | **1095** | 0/008844759 | 0/019029198 | 0/033344687 |
| 96 | 0/013601768 | 0/026864937 | 0/043588138 | **1096** | 0/008844759 | 0/019029198 | 0/033344687 |
| 97 | 0/013601768 | 0/026864937 | 0/043588138 | **1097** | 0/008844759 | 0/019029198 | 0/03328842 |
| 98 | 0/013601768 | 0/026864937 | 0/043588138 | **1098** | 0/008844759 | 0/019029198 | 0/03328842 |
| 99 | 0/013601768 | 0/026864937 | 0/043588138 | **1099** | 0/008844759 | 0/019029198 | 0/03328842 |
| 100 | 0/013601768 | 0/026864937 | 0/043588138 | **1100** | 0/008844759 | 0/019029198 | 0/03328842 |
| 101 | 0/013601768 | 0/026864937 | 0/043588138 | **1101** | 0/008844759 | 0/019029198 | 0/03328842 |
| 102 | 0/013601768 | 0/026864937 | 0/043588138 | **1102** | 0/008844759 | 0/019029198 | 0/03328842 |
| 103 | 0/013601768 | 0/026864937 | 0/043588138 | **1103** | 0/008844759 | 0/019029198 | 0/03328842 |
| 104 | 0/013601768 | 0/026864937 | 0/043588138 | **1104** | 0/008844759 | 0/019029198 | 0/03328842 |
| 105 | 0/013601768 | 0/026864937 | 0/043588138 | **1105** | 0/008844759 | 0/019029198 | 0/03328842 |
| 106 | 0/013601768 | 0/026864937 | 0/043588138 | **1106** | 0/008844759 | 0/019029198 | 0/03328842 |
| 107 | 0/013601768 | 0/026864937 | 0/043588138 | **1107** | 0/008844759 | 0/019029198 | 0/03328842 |
| 108 | 0/013601768 | 0/026864937 | 0/043588138 | **1108** | 0/008844759 | 0/019029198 | 0/03328842 |
| 109 | 0/013601768 | 0/026864937 | 0/043588138 | **1109** | 0/008844759 | 0/019029198 | 0/03328842 |
| 110 | 0/013601768 | 0/026864937 | 0/043588138 | **1110** | 0/008844759 | 0/019029198 | 0/03328842 |
| 111 | 0/013601768 | 0/026864937 | 0/043588138 | **1111** | 0/008844759 | 0/019029198 | 0/03328842 |
| 112 | 0/013601768 | 0/026864937 | 0/043588138 | **1112** | 0/008844759 | 0/019029198 | 0/03328842 |
| 113 | 0/013601768 | 0/026864937 | 0/043588138 | **1113** | 0/008844759 | 0/019029198 | 0/03328842 |
| 114 | 0/013601768 | 0/026864937 | 0/043588138 | **1114** | 0/008844759 | 0/019029198 | 0/03328842 |
| 115 | 0/013601768 | 0/026864937 | 0/043588138 | **1115** | 0/008844759 | 0/019029198 | 0/03328842 |
| 116 | 0/013601768 | 0/026864937 | 0/043588138 | **1116** | 0/008844759 | 0/019029198 | 0/03328842 |
| 117 | 0/013601768 | 0/026864937 | 0/043588138 | **1117** | 0/008844759 | 0/019029198 | 0/03328842 |
| 118 | 0/013601768 | 0/026864937 | 0/043588138 | **1118** | 0/008844759 | 0/019029198 | 0/03328842 |
| 119 | 0/013601768 | 0/026864937 | 0/043588138 | **1119** | 0/008844759 | 0/019029198 | 0/03328842 |
| 120 | 0/013601768 | 0/026864937 | 0/043588138 | **1120** | 0/008844759 | 0/019029198 | 0/03328842 |
| 121 | 0/013273812 | 0/026864937 | 0/043588138 | **1121** | 0/008844759 | 0/019029198 | 0/03328842 |
| 122 | 0/013273812 | 0/026864937 | 0/043588138 | **1122** | 0/008844759 | 0/019029198 | 0/03328842 |
| 123 | 0/013273812 | 0/026864937 | 0/043588138 | **1123** | 0/008844759 | 0/019029198 | 0/03328842 |
| 124 | 0/013273812 | 0/026864937 | 0/043588138 | **1124** | 0/008844759 | 0/019029198 | 0/03328842 |
| 125 | 0/012941713 | 0/026864937 | 0/043588138 | **1125** | 0/008844759 | 0/019029198 | 0/03328842 |
| 126 | 0/012941713 | 0/026864937 | 0/043588138 | **1126** | 0/008844759 | 0/019029198 | 0/03328842 |
| 127 | 0/012941713 | 0/026864937 | 0/043340711 | **1127** | 0/008844759 | 0/019029198 | 0/03328842 |
| 128 | 0/012941713 | 0/026864937 | 0/043340711 | **1128** | 0/008844759 | 0/019029198 | 0/03328842 |
| 129 | 0/012941713 | 0/026864937 | 0/043340711 | **1129** | 0/008844759 | 0/019029198 | 0/03328842 |
| 130 | 0/012941713 | 0/026864937 | 0/043340711 | **1130** | 0/008844759 | 0/019029198 | 0/03328842 |
| 131 | 0/012941713 | 0/026864937 | 0/043340711 | **1131** | 0/008844759 | 0/019029198 | 0/03328842 |
| 132 | 0/012941713 | 0/026864937 | 0/043340711 | **1132** | 0/008844759 | 0/019029198 | 0/03328842 |
| 133 | 0/012941713 | 0/026864937 | 0/043340711 | **1133** | 0/008844759 | 0/019029198 | 0/03328842 |
| 134 | 0/012444371 | 0/026864937 | 0/043340711 | **1134** | 0/008844759 | 0/019029198 | 0/03328842 |
| 135 | 0/012444371 | 0/026864937 | 0/043340711 | **1135** | 0/008844759 | 0/019029198 | 0/03328842 |
| 136 | 0/012444371 | 0/026864937 | 0/043340711 | **1136** | 0/008844759 | 0/019029198 | 0/03328842 |
| 137 | 0/012444371 | 0/026864937 | 0/043340711 | **1137** | 0/008844759 | 0/019029198 | 0/03328842 |
| 138 | 0/012444371 | 0/026864937 | 0/043340711 | **1138** | 0/008844759 | 0/019029198 | 0/03328842 |
| 139 | 0/012444371 | 0/026864937 | 0/043340711 | **1139** | 0/008844759 | 0/019029198 | 0/03328842 |
| 140 | 0/012444371 | 0/026864937 | 0/043340711 | **1140** | 0/008844759 | 0/019029198 | 0/03328842 |
| 141 | 0/012444371 | 0/026864937 | 0/043340711 | **1141** | 0/008844759 | 0/019029198 | 0/03328842 |
| 142 | 0/012444371 | 0/026864937 | 0/043340711 | **1142** | 0/008844759 | 0/019029198 | 0/03328842 |
| 143 | 0/012444371 | 0/026864937 | 0/043340711 | **1143** | 0/008844759 | 0/019029198 | 0/03328842 |
| 144 | 0/012444371 | 0/026864937 | 0/043340711 | **1144** | 0/008844759 | 0/019029198 | 0/03328842 |
| 145 | 0/012444371 | 0/026864937 | 0/043340711 | **1145** | 0/008844759 | 0/019029198 | 0/03328842 |
| 146 | 0/012444371 | 0/026864937 | 0/043340711 | **1146** | 0/008844759 | 0/019029198 | 0/03328842 |
| 147 | 0/012444371 | 0/026864937 | 0/043340711 | **1147** | 0/008844759 | 0/019029198 | 0/03328842 |
| 148 | 0/012444371 | 0/026864937 | 0/043340711 | **1148** | 0/008844759 | 0/019029198 | 0/03328842 |
| 149 | 0/012444371 | 0/026864937 | 0/043340711 | **1149** | 0/008844759 | 0/019029198 | 0/03328842 |
| 150 | 0/012444371 | 0/025679962 | 0/043340711 | **1150** | 0/008844759 | 0/019029198 | 0/03328842 |
| 151 | 0/012444371 | 0/025679962 | 0/043340711 | **1151** | 0/008844759 | 0/019029198 | 0/03328842 |
| 152 | 0/012444371 | 0/025679962 | 0/043340711 | **1152** | 0/008844759 | 0/019029198 | 0/03328842 |
| 153 | 0/012444371 | 0/025679962 | 0/043340711 | **1153** | 0/008844759 | 0/019029198 | 0/03328842 |
| 154 | 0/012444371 | 0/025679962 | 0/043340711 | **1154** | 0/008844759 | 0/019029198 | 0/03328842 |
| 155 | 0/012444371 | 0/025679962 | 0/043340711 | **1155** | 0/008844759 | 0/019029198 | 0/03328842 |
| 156 | 0/012444371 | 0/025679962 | 0/043340711 | **1156** | 0/008844759 | 0/019029198 | 0/03328842 |
| 157 | 0/012444371 | 0/025679962 | 0/043340711 | **1157** | 0/008844759 | 0/019029198 | 0/03328842 |
| 158 | 0/012444371 | 0/025679962 | 0/043340711 | **1158** | 0/008844759 | 0/019029198 | 0/03328842 |
| 159 | 0/012444371 | 0/025679962 | 0/043340711 | **1159** | 0/008844759 | 0/019029198 | 0/03328842 |
| 160 | 0/012444371 | 0/025679962 | 0/043340711 | **1160** | 0/008844759 | 0/019029198 | 0/03328842 |
| 161 | 0/012444371 | 0/025679962 | 0/043340711 | **1161** | 0/008770818 | 0/019029198 | 0/03328842 |
| 162 | 0/012444371 | 0/025679962 | 0/043340711 | **1162** | 0/008770818 | 0/019029198 | 0/03328842 |
| 163 | 0/012444371 | 0/025679962 | 0/043340711 | **1163** | 0/008770818 | 0/019029198 | 0/03328842 |
| 164 | 0/012444371 | 0/025679962 | 0/043340711 | **1164** | 0/008770818 | 0/019029198 | 0/03328842 |
| 165 | 0/012444371 | 0/025679962 | 0/043340711 | **1165** | 0/008770818 | 0/019029198 | 0/03328842 |
| 166 | 0/012444371 | 0/025679962 | 0/043340711 | **1166** | 0/008770818 | 0/019029198 | 0/03328842 |
| 167 | 0/012444371 | 0/025679962 | 0/043340711 | **1167** | 0/008770818 | 0/019029198 | 0/03328842 |
| 168 | 0/012444371 | 0/025679962 | 0/043340711 | **1168** | 0/008770818 | 0/019029198 | 0/03328842 |
| 169 | 0/012444371 | 0/025679962 | 0/043340711 | **1169** | 0/008770818 | 0/019029198 | 0/03328842 |
| 170 | 0/012444371 | 0/025679962 | 0/043340711 | **1170** | 0/008770818 | 0/019029198 | 0/03328842 |
| 171 | 0/012444371 | 0/025679962 | 0/043340711 | **1171** | 0/008770818 | 0/019029198 | 0/03328842 |
| 172 | 0/012444371 | 0/025679962 | 0/043340711 | **1172** | 0/008770818 | 0/019029198 | 0/03328842 |
| 173 | 0/012444371 | 0/025679962 | 0/043340711 | **1173** | 0/008770818 | 0/019029198 | 0/03328842 |
| 174 | 0/012444371 | 0/025679962 | 0/043340711 | **1174** | 0/008770818 | 0/019029198 | 0/03328842 |
| 175 | 0/012444371 | 0/025679962 | 0/043340711 | **1175** | 0/008189335 | 0/019029198 | 0/03328842 |
| 176 | 0/012444371 | 0/025679962 | 0/043340711 | **1176** | 0/008189335 | 0/019029198 | 0/03328842 |
| 177 | 0/012444371 | 0/025679962 | 0/043340711 | **1177** | 0/008189335 | 0/019029198 | 0/03328842 |
| 178 | 0/012444371 | 0/025679962 | 0/043340711 | **1178** | 0/008189335 | 0/019029198 | 0/03328842 |
| 179 | 0/012444371 | 0/025679962 | 0/043340711 | **1179** | 0/008189335 | 0/019029198 | 0/03328842 |
| 180 | 0/012444371 | 0/025679962 | 0/043340711 | **1180** | 0/008189335 | 0/019029198 | 0/03328842 |
| 181 | 0/012444371 | 0/025679962 | 0/043340711 | **1181** | 0/008189335 | 0/019029198 | 0/03328842 |
| 182 | 0/012444371 | 0/025679962 | 0/043340711 | **1182** | 0/008189335 | 0/019029198 | 0/03328842 |
| 183 | 0/012444371 | 0/024785429 | 0/043340711 | **1183** | 0/008189335 | 0/019029198 | 0/03328842 |
| 184 | 0/012444371 | 0/024785429 | 0/043340711 | **1184** | 0/008189335 | 0/019029198 | 0/03328842 |
| 185 | 0/012444371 | 0/024785429 | 0/043340711 | **1185** | 0/008189335 | 0/019029198 | 0/03328842 |
| 186 | 0/012444371 | 0/024785429 | 0/043340711 | **1186** | 0/008189335 | 0/019029198 | 0/03328842 |
| 187 | 0/012444371 | 0/024785429 | 0/043340711 | **1187** | 0/008189335 | 0/019029198 | 0/03328842 |
| 188 | 0/012444371 | 0/024785429 | 0/043340711 | **1188** | 0/008189335 | 0/019029198 | 0/03328842 |
| 189 | 0/012444371 | 0/024785429 | 0/040863634 | **1189** | 0/008189335 | 0/019029198 | 0/03328842 |
| 190 | 0/012444371 | 0/024785429 | 0/040863634 | **1190** | 0/008189335 | 0/019029198 | 0/03328842 |
| 191 | 0/012444371 | 0/024785429 | 0/040863634 | **1191** | 0/008189335 | 0/019029198 | 0/03328842 |
| 192 | 0/012444371 | 0/024785429 | 0/040863634 | **1192** | 0/008189335 | 0/019029198 | 0/03328842 |
| 193 | 0/012444371 | 0/024785429 | 0/040863634 | **1193** | 0/008189335 | 0/019029198 | 0/032424822 |
| 194 | 0/012444371 | 0/024785429 | 0/040863634 | **1194** | 0/008189335 | 0/019029198 | 0/032424822 |
| 195 | 0/012444371 | 0/024785429 | 0/040863634 | **1195** | 0/008189335 | 0/019029198 | 0/032424822 |
| 196 | 0/012444371 | 0/024785429 | 0/040863634 | **1196** | 0/008189335 | 0/019029198 | 0/032424822 |
| 197 | 0/012444371 | 0/024785429 | 0/040863634 | **1197** | 0/008189335 | 0/019029198 | 0/032424822 |
| 198 | 0/012444371 | 0/024785429 | 0/040863634 | **1198** | 0/008189335 | 0/019029198 | 0/032424822 |
| 199 | 0/012444371 | 0/024785429 | 0/040863634 | **1199** | 0/008189335 | 0/019029198 | 0/032424822 |
| 200 | 0/012444371 | 0/024785429 | 0/040863634 | **1200** | 0/008189335 | 0/019029198 | 0/032424822 |
| 201 | 0/012444371 | 0/024785429 | 0/040863634 | **1201** | 0/008189335 | 0/019029198 | 0/032424822 |
| 202 | 0/012444371 | 0/024785429 | 0/040863634 | **1202** | 0/008189335 | 0/019029198 | 0/032424822 |
| 203 | 0/012444371 | 0/024785429 | 0/040863634 | **1203** | 0/008189335 | 0/019029198 | 0/032424822 |
| 204 | 0/012444371 | 0/024785429 | 0/040863634 | **1204** | 0/008189335 | 0/019029198 | 0/032424822 |
| 205 | 0/012444371 | 0/024785429 | 0/040863634 | **1205** | 0/008189335 | 0/019029198 | 0/032424822 |
| 206 | 0/012444371 | 0/024785429 | 0/040863634 | **1206** | 0/008189335 | 0/019029198 | 0/032424822 |
| 207 | 0/012444371 | 0/024785429 | 0/040863634 | **1207** | 0/008189335 | 0/019029198 | 0/032424822 |
| 208 | 0/012444371 | 0/024785429 | 0/040863634 | **1208** | 0/008189335 | 0/019029198 | 0/032424822 |
| 209 | 0/012444371 | 0/024785429 | 0/040863634 | **1209** | 0/008189335 | 0/019029198 | 0/032424822 |
| 210 | 0/012444371 | 0/024785429 | 0/040863634 | **1210** | 0/008189335 | 0/019029198 | 0/032424822 |
| 211 | 0/012444371 | 0/024785429 | 0/040863634 | **1211** | 0/008189335 | 0/019029198 | 0/032424822 |
| 212 | 0/012444371 | 0/024785429 | 0/040863634 | **1212** | 0/008189335 | 0/019029198 | 0/032424822 |
| 213 | 0/012444371 | 0/024785429 | 0/040863634 | **1213** | 0/008189335 | 0/019029198 | 0/032424822 |
| 214 | 0/012444371 | 0/024785429 | 0/040863634 | **1214** | 0/008189335 | 0/019029198 | 0/032424822 |
| 215 | 0/012444371 | 0/024785429 | 0/040863634 | **1215** | 0/008189335 | 0/019029198 | 0/032424822 |
| 216 | 0/012444371 | 0/024785429 | 0/040863634 | **1216** | 0/008189335 | 0/019029198 | 0/032424822 |
| 217 | 0/012444371 | 0/024785429 | 0/040863634 | **1217** | 0/008189335 | 0/019029198 | 0/032424822 |
| 218 | 0/012444371 | 0/024785429 | 0/040863634 | **1218** | 0/008189335 | 0/019029198 | 0/032424822 |
| 219 | 0/012444371 | 0/024785429 | 0/040863634 | **1219** | 0/008189335 | 0/019029198 | 0/032424822 |
| 220 | 0/012444371 | 0/024785429 | 0/040863634 | **1220** | 0/008189335 | 0/019029198 | 0/032424822 |
| 221 | 0/012444371 | 0/024785429 | 0/040863634 | **1221** | 0/008189335 | 0/019029198 | 0/032424822 |
| 222 | 0/012444371 | 0/024785429 | 0/040863634 | **1222** | 0/008189335 | 0/019029198 | 0/032424822 |
| 223 | 0/012444371 | 0/024785429 | 0/040863634 | **1223** | 0/008189335 | 0/019029198 | 0/032424822 |
| 224 | 0/012444371 | 0/024785429 | 0/040863634 | **1224** | 0/008189335 | 0/019029198 | 0/032424822 |
| 225 | 0/012444371 | 0/024785429 | 0/040863634 | **1225** | 0/008189335 | 0/019029198 | 0/032424822 |
| 226 | 0/012444371 | 0/024785429 | 0/040863634 | **1226** | 0/008189335 | 0/019029198 | 0/032424822 |
| 227 | 0/012444371 | 0/024785429 | 0/040863634 | **1227** | 0/008189335 | 0/019029198 | 0/032424822 |
| 228 | 0/012444371 | 0/024785429 | 0/040863634 | **1228** | 0/008189335 | 0/019029198 | 0/032424822 |
| 229 | 0/012444371 | 0/024785429 | 0/040863634 | **1229** | 0/008189335 | 0/019029198 | 0/032424822 |
| 230 | 0/012444371 | 0/024785429 | 0/040863634 | **1230** | 0/008189335 | 0/019029198 | 0/032424822 |
| 231 | 0/012444371 | 0/024785429 | 0/040863634 | **1231** | 0/008189335 | 0/019029198 | 0/032424822 |
| 232 | 0/012444371 | 0/024785429 | 0/040863634 | **1232** | 0/008189335 | 0/019029198 | 0/032424822 |
| 233 | 0/012444371 | 0/024785429 | 0/040863634 | **1233** | 0/008189335 | 0/019029198 | 0/032424822 |
| 234 | 0/012444371 | 0/024785429 | 0/040863634 | **1234** | 0/008189335 | 0/019029198 | 0/032424822 |
| 235 | 0/012444371 | 0/024785429 | 0/040863634 | **1235** | 0/008189335 | 0/019029198 | 0/032424822 |
| 236 | 0/012444371 | 0/024785429 | 0/040863634 | **1236** | 0/008189335 | 0/019029198 | 0/032424822 |
| 237 | 0/012444371 | 0/024785429 | 0/040863634 | **1237** | 0/008189335 | 0/019029198 | 0/032424822 |
| 238 | 0/012444371 | 0/024785429 | 0/040863634 | **1238** | 0/008189335 | 0/019029198 | 0/032424822 |
| 239 | 0/012444371 | 0/024785429 | 0/040863634 | **1239** | 0/008189335 | 0/019029198 | 0/032424822 |
| 240 | 0/012444371 | 0/024785429 | 0/040863634 | **1240** | 0/008189335 | 0/019029198 | 0/032424822 |
| 241 | 0/012444371 | 0/024785429 | 0/040863634 | **1241** | 0/008189335 | 0/019029198 | 0/032424822 |
| 242 | 0/012444371 | 0/024785429 | 0/040863634 | **1242** | 0/008189335 | 0/019029198 | 0/032424822 |
| 243 | 0/012444371 | 0/024785429 | 0/040863634 | **1243** | 0/008189335 | 0/019029198 | 0/032424822 |
| 244 | 0/012444371 | 0/024785429 | 0/040863634 | **1244** | 0/008189335 | 0/019029198 | 0/032424822 |
| 245 | 0/012444371 | 0/024785429 | 0/040863634 | **1245** | 0/008189335 | 0/019029198 | 0/032424822 |
| 246 | 0/012444371 | 0/024785429 | 0/040863634 | **1246** | 0/008189335 | 0/019029198 | 0/032424822 |
| 247 | 0/012444371 | 0/024785429 | 0/040863634 | **1247** | 0/008189335 | 0/019029198 | 0/032424822 |
| 248 | 0/012444371 | 0/024785429 | 0/040863634 | **1248** | 0/008189335 | 0/019029198 | 0/032424822 |
| 249 | 0/012444371 | 0/024785429 | 0/040863634 | **1249** | 0/008189335 | 0/019029198 | 0/032424822 |
| 250 | 0/012444371 | 0/024785429 | 0/040863634 | **1250** | 0/008189335 | 0/019029198 | 0/032424822 |
| 251 | 0/012444371 | 0/024785429 | 0/040863634 | **1251** | 0/008189335 | 0/019029198 | 0/032424822 |
| 252 | 0/012444371 | 0/024785429 | 0/040863634 | **1252** | 0/008189335 | 0/019029198 | 0/032424822 |
| 253 | 0/012444371 | 0/024785429 | 0/040863634 | **1253** | 0/008189335 | 0/019029198 | 0/032424822 |
| 254 | 0/012444371 | 0/024785429 | 0/040863634 | **1254** | 0/008189335 | 0/019029198 | 0/032424822 |
| 255 | 0/012444371 | 0/024785429 | 0/040863634 | **1255** | 0/008189335 | 0/019029198 | 0/032424822 |
| 256 | 0/012444371 | 0/024785429 | 0/040863634 | **1256** | 0/008189335 | 0/019029198 | 0/032424822 |
| 257 | 0/012444371 | 0/024785429 | 0/040863634 | **1257** | 0/008189335 | 0/019029198 | 0/032424822 |
| 258 | 0/012444371 | 0/024785429 | 0/040863634 | **1258** | 0/008189335 | 0/019029198 | 0/032424822 |
| 259 | 0/012444371 | 0/024785429 | 0/040863634 | **1259** | 0/008189335 | 0/019029198 | 0/032424822 |
| 260 | 0/012444371 | 0/024785429 | 0/040863634 | **1260** | 0/008189335 | 0/019029198 | 0/032424822 |
| 261 | 0/012444371 | 0/024785429 | 0/040863634 | **1261** | 0/008189335 | 0/019029198 | 0/032424822 |
| 262 | 0/012444371 | 0/024785429 | 0/040863634 | **1262** | 0/008189335 | 0/019029198 | 0/032424822 |
| 263 | 0/012444371 | 0/024785429 | 0/040863634 | **1263** | 0/008189335 | 0/019029198 | 0/032424822 |
| 264 | 0/012444371 | 0/024785429 | 0/040863634 | **1264** | 0/008189335 | 0/019029198 | 0/032424822 |
| 265 | 0/012444371 | 0/024785429 | 0/040863634 | **1265** | 0/008189335 | 0/019029198 | 0/032424822 |
| 266 | 0/012444371 | 0/024785429 | 0/040863634 | **1266** | 0/008189335 | 0/019029198 | 0/032424822 |
| 267 | 0/012444371 | 0/024785429 | 0/040863634 | **1267** | 0/008189335 | 0/019029198 | 0/032424822 |
| 268 | 0/012444371 | 0/024785429 | 0/040863634 | **1268** | 0/008189335 | 0/019029198 | 0/032424822 |
| 269 | 0/012444371 | 0/024785429 | 0/040863634 | **1269** | 0/008189335 | 0/019029198 | 0/032424822 |
| 270 | 0/012444371 | 0/024785429 | 0/040863634 | **1270** | 0/008189335 | 0/019029198 | 0/032424822 |
| 271 | 0/012444371 | 0/024785429 | 0/040863634 | **1271** | 0/008189335 | 0/019029198 | 0/032424822 |
| 272 | 0/012444371 | 0/024785429 | 0/040863634 | **1272** | 0/008189335 | 0/019029198 | 0/032424822 |
| 273 | 0/012444371 | 0/024785429 | 0/040863634 | **1273** | 0/008189335 | 0/019029198 | 0/032424822 |
| 274 | 0/012444371 | 0/024785429 | 0/040863634 | **1274** | 0/008189335 | 0/019029198 | 0/032424822 |
| 275 | 0/012444371 | 0/024785429 | 0/040863634 | **1275** | 0/008189335 | 0/019029198 | 0/032424822 |
| 276 | 0/012444371 | 0/024785429 | 0/040863634 | **1276** | 0/008189335 | 0/019029198 | 0/032424822 |
| 277 | 0/012444371 | 0/024785429 | 0/040863634 | **1277** | 0/008189335 | 0/019029198 | 0/032424822 |
| 278 | 0/012444371 | 0/024785429 | 0/040863634 | **1278** | 0/008189335 | 0/019029198 | 0/032424822 |
| 279 | 0/012444371 | 0/024785429 | 0/040863634 | **1279** | 0/008189335 | 0/019029198 | 0/032424822 |
| 280 | 0/012444371 | 0/024785429 | 0/040863634 | **1280** | 0/008189335 | 0/019029198 | 0/032424822 |
| 281 | 0/012444371 | 0/024785429 | 0/040863634 | **1281** | 0/008189335 | 0/019029198 | 0/032424822 |
| 282 | 0/012444371 | 0/024785429 | 0/040863634 | **1282** | 0/008189335 | 0/019029198 | 0/032424822 |
| 283 | 0/012444371 | 0/024785429 | 0/040863634 | **1283** | 0/008189335 | 0/019029198 | 0/032424822 |
| 284 | 0/012444371 | 0/024785429 | 0/040863634 | **1284** | 0/008189335 | 0/019029198 | 0/032424822 |
| 285 | 0/012444371 | 0/024785429 | 0/040863634 | **1285** | 0/008189335 | 0/019029198 | 0/032424822 |
| 286 | 0/012143718 | 0/024785429 | 0/040863634 | **1286** | 0/008189335 | 0/019029198 | 0/032424822 |
| 287 | 0/012143718 | 0/024785429 | 0/040863634 | **1287** | 0/008189335 | 0/019029198 | 0/032424822 |
| 288 | 0/012143718 | 0/024785429 | 0/040863634 | **1288** | 0/008189335 | 0/019029198 | 0/032424822 |
| 289 | 0/012143718 | 0/024785429 | 0/040863634 | **1289** | 0/008189335 | 0/019029198 | 0/032424822 |
| 290 | 0/012143718 | 0/024785429 | 0/040863634 | **1290** | 0/008189335 | 0/019029198 | 0/032424822 |
| 291 | 0/012143718 | 0/024785429 | 0/040863634 | **1291** | 0/008189335 | 0/019029198 | 0/032424822 |
| 292 | 0/012143718 | 0/024785429 | 0/040863634 | **1292** | 0/008189335 | 0/019029198 | 0/032424822 |
| 293 | 0/012143718 | 0/024785429 | 0/040863634 | **1293** | 0/008189335 | 0/019029198 | 0/032424822 |
| 294 | 0/012143718 | 0/024785429 | 0/040863634 | **1294** | 0/008189335 | 0/019029198 | 0/032424822 |
| 295 | 0/012143718 | 0/024785429 | 0/040863634 | **1295** | 0/008189335 | 0/019029198 | 0/032424822 |
| 296 | 0/012143718 | 0/024785429 | 0/040863634 | **1296** | 0/008189335 | 0/019029198 | 0/032424822 |
| 297 | 0/012143718 | 0/024785429 | 0/040863634 | **1297** | 0/008189335 | 0/019029198 | 0/032424822 |
| 298 | 0/012143718 | 0/024785429 | 0/040863634 | **1298** | 0/008189335 | 0/019029198 | 0/032424822 |
| 299 | 0/012143718 | 0/024785429 | 0/040863634 | **1299** | 0/008189335 | 0/019029198 | 0/032424822 |
| 300 | 0/012143718 | 0/024785429 | 0/040863634 | **1300** | 0/008189335 | 0/019029198 | 0/032424822 |
| 301 | 0/012143718 | 0/024785429 | 0/040863634 | **1301** | 0/008189335 | 0/019029198 | 0/032424822 |
| 302 | 0/012143718 | 0/024785429 | 0/040863634 | **1302** | 0/008189335 | 0/019029198 | 0/032424822 |
| 303 | 0/012143718 | 0/024148757 | 0/040863634 | **1303** | 0/008189335 | 0/019029198 | 0/032424822 |
| 304 | 0/012143718 | 0/024148757 | 0/040863634 | **1304** | 0/008189335 | 0/019029198 | 0/032424822 |
| 305 | 0/011096081 | 0/024148757 | 0/040863634 | **1305** | 0/008189335 | 0/019029198 | 0/032424822 |
| 306 | 0/011096081 | 0/024148757 | 0/040863634 | **1306** | 0/008189335 | 0/019029198 | 0/032424822 |
| 307 | 0/011096081 | 0/024148757 | 0/040863634 | **1307** | 0/008189335 | 0/019029198 | 0/032424822 |
| 308 | 0/011096081 | 0/024148757 | 0/040863634 | **1308** | 0/008189335 | 0/019029198 | 0/032424822 |
| 309 | 0/011096081 | 0/024148757 | 0/040863634 | **1309** | 0/008189335 | 0/019029198 | 0/032424822 |
| 310 | 0/011096081 | 0/024148757 | 0/040863634 | **1310** | 0/008189335 | 0/019029198 | 0/032424822 |
| 311 | 0/011096081 | 0/024148757 | 0/040863634 | **1311** | 0/008189335 | 0/019029198 | 0/032424822 |
| 312 | 0/011096081 | 0/024148757 | 0/040863634 | **1312** | 0/008189335 | 0/019029198 | 0/032424822 |
| 313 | 0/011096081 | 0/024148757 | 0/040863634 | **1313** | 0/008152441 | 0/019029198 | 0/032424822 |
| 314 | 0/011096081 | 0/024148757 | 0/040863634 | **1314** | 0/008152441 | 0/019029198 | 0/032424822 |
| 315 | 0/011096081 | 0/024148757 | 0/040863634 | **1315** | 0/008152441 | 0/019029198 | 0/032424822 |
| 316 | 0/011096081 | 0/024148757 | 0/040863634 | **1316** | 0/008152441 | 0/019029198 | 0/032424822 |
| 317 | 0/011096081 | 0/024148757 | 0/040863634 | **1317** | 0/008152441 | 0/019029198 | 0/032424822 |
| 318 | 0/010569152 | 0/024148757 | 0/040863634 | **1318** | 0/008152441 | 0/019029198 | 0/032424822 |
| 319 | 0/010569152 | 0/024148757 | 0/040863634 | **1319** | 0/008152441 | 0/019029198 | 0/032424822 |
| 320 | 0/010569152 | 0/024148757 | 0/040863634 | **1320** | 0/008152441 | 0/019029198 | 0/032424822 |
| 321 | 0/010569152 | 0/024148757 | 0/040863634 | **1321** | 0/008152441 | 0/019029198 | 0/032424822 |
| 322 | 0/010569152 | 0/024148757 | 0/040863634 | **1322** | 0/008152441 | 0/019029198 | 0/032424822 |
| 323 | 0/010569152 | 0/024148757 | 0/040863634 | **1323** | 0/008152441 | 0/019029198 | 0/032424822 |
| 324 | 0/010569152 | 0/024148757 | 0/040863634 | **1324** | 0/008152441 | 0/019029198 | 0/032424822 |
| 325 | 0/010569152 | 0/024148757 | 0/040863634 | **1325** | 0/008152441 | 0/019029198 | 0/032424822 |
| 326 | 0/010569152 | 0/024148757 | 0/040863634 | **1326** | 0/008152441 | 0/019029198 | 0/032424822 |
| 327 | 0/010569152 | 0/024148757 | 0/040863634 | **1327** | 0/008152441 | 0/019029198 | 0/032424822 |
| 328 | 0/010569152 | 0/024148757 | 0/040863634 | **1328** | 0/008152441 | 0/019029198 | 0/032424822 |
| 329 | 0/010569152 | 0/024148757 | 0/040863634 | **1329** | 0/008152441 | 0/019029198 | 0/032424822 |
| 330 | 0/010569152 | 0/024148757 | 0/040863634 | **1330** | 0/008152441 | 0/019029198 | 0/031876562 |
| 331 | 0/010569152 | 0/024148757 | 0/040863634 | **1331** | 0/008152441 | 0/019029198 | 0/031876562 |
| 332 | 0/010569152 | 0/024148757 | 0/040863634 | **1332** | 0/008152441 | 0/019029198 | 0/031876562 |
| 333 | 0/010569152 | 0/024148757 | 0/040863634 | **1333** | 0/008152441 | 0/019029198 | 0/031876562 |
| 334 | 0/010569152 | 0/024148757 | 0/040863634 | **1334** | 0/008152441 | 0/019029198 | 0/031876562 |
| 335 | 0/010569152 | 0/024148757 | 0/040863634 | **1335** | 0/008152441 | 0/019029198 | 0/031876562 |
| 336 | 0/010569152 | 0/024148757 | 0/040863634 | **1336** | 0/008152441 | 0/019029198 | 0/031876562 |
| 337 | 0/010569152 | 0/024148757 | 0/040863634 | **1337** | 0/008152441 | 0/019029198 | 0/031876562 |
| 338 | 0/010569152 | 0/024148757 | 0/040863634 | **1338** | 0/008152441 | 0/019029198 | 0/031876562 |
| 339 | 0/010569152 | 0/024148757 | 0/040863634 | **1339** | 0/008152441 | 0/019029198 | 0/031876562 |
| 340 | 0/010569152 | 0/024148757 | 0/040863634 | **1340** | 0/008152441 | 0/019029198 | 0/031876562 |
| 341 | 0/010569152 | 0/024148757 | 0/040863634 | **1341** | 0/008152441 | 0/019029198 | 0/031876562 |
| 342 | 0/010569152 | 0/024148757 | 0/040863634 | **1342** | 0/008152441 | 0/019029198 | 0/031876562 |
| 343 | 0/010569152 | 0/024148757 | 0/040863634 | **1343** | 0/008152441 | 0/019029198 | 0/031876562 |
| 344 | 0/010569152 | 0/024148757 | 0/040863634 | **1344** | 0/008152441 | 0/019029198 | 0/031876562 |
| 345 | 0/010569152 | 0/024148757 | 0/040863634 | **1345** | 0/008152441 | 0/019029198 | 0/031876562 |
| 346 | 0/010569152 | 0/024148757 | 0/03634282 | **1346** | 0/008152441 | 0/019029198 | 0/031876562 |
| 347 | 0/010569152 | 0/024148757 | 0/03634282 | **1347** | 0/008152441 | 0/019029198 | 0/031876562 |
| 348 | 0/010569152 | 0/024148757 | 0/03634282 | **1348** | 0/008152441 | 0/019029198 | 0/031876562 |
| 349 | 0/010569152 | 0/024148757 | 0/03634282 | **1349** | 0/008152441 | 0/019029198 | 0/031876562 |
| 350 | 0/010569152 | 0/024148757 | 0/03634282 | **1350** | 0/008152441 | 0/019029198 | 0/031876562 |
| 351 | 0/010569152 | 0/024148757 | 0/03634282 | **1351** | 0/008152441 | 0/019029198 | 0/031876562 |
| 352 | 0/010569152 | 0/024148757 | 0/03634282 | **1352** | 0/008152441 | 0/019029198 | 0/031876562 |
| 353 | 0/010202134 | 0/024148757 | 0/03634282 | **1353** | 0/008152441 | 0/019029198 | 0/031876562 |
| 354 | 0/010202134 | 0/024148757 | 0/03634282 | **1354** | 0/008152441 | 0/019029198 | 0/031876562 |
| 355 | 0/010202134 | 0/024148757 | 0/03634282 | **1355** | 0/008152441 | 0/019029198 | 0/031876562 |
| 356 | 0/010202134 | 0/024148757 | 0/03634282 | **1356** | 0/008152441 | 0/019029198 | 0/031876562 |
| 357 | 0/010202134 | 0/024148757 | 0/03634282 | **1357** | 0/008152441 | 0/019029198 | 0/031876562 |
| 358 | 0/009286741 | 0/024148757 | 0/03634282 | **1358** | 0/008152441 | 0/019029198 | 0/031876562 |
| 359 | 0/009286741 | 0/024148757 | 0/03634282 | **1359** | 0/008152441 | 0/019029198 | 0/031876562 |
| 360 | 0/009286741 | 0/024148757 | 0/03634282 | **1360** | 0/008152441 | 0/019029198 | 0/031876562 |
| 361 | 0/009286741 | 0/024148757 | 0/03634282 | **1361** | 0/008152441 | 0/019029198 | 0/031876562 |
| 362 | 0/009286741 | 0/024148757 | 0/03634282 | **1362** | 0/008152441 | 0/019029198 | 0/031876562 |
| 363 | 0/009286741 | 0/024148757 | 0/03634282 | **1363** | 0/008152441 | 0/019029198 | 0/031876562 |
| 364 | 0/009286741 | 0/024148757 | 0/03634282 | **1364** | 0/008152441 | 0/019029198 | 0/031876562 |
| 365 | 0/009286741 | 0/022773308 | 0/03634282 | **1365** | 0/008152441 | 0/019029198 | 0/031876562 |
| 366 | 0/009286741 | 0/022773308 | 0/03634282 | **1366** | 0/008152441 | 0/019029198 | 0/031876562 |
| 367 | 0/009286741 | 0/022773308 | 0/03634282 | **1367** | 0/008152441 | 0/019029198 | 0/031876562 |
| 368 | 0/009286741 | 0/022773308 | 0/03634282 | **1368** | 0/008152441 | 0/019029198 | 0/031876562 |
| 369 | 0/009286741 | 0/022773308 | 0/03634282 | **1369** | 0/008152441 | 0/019029198 | 0/031876562 |
| 370 | 0/009286741 | 0/022773308 | 0/03634282 | **1370** | 0/008152441 | 0/019029198 | 0/031876562 |
| 371 | 0/009286741 | 0/022773308 | 0/03634282 | **1371** | 0/008152441 | 0/019029198 | 0/031876562 |
| 372 | 0/009286741 | 0/022773308 | 0/03634282 | **1372** | 0/008152441 | 0/019029198 | 0/031876562 |
| 373 | 0/009286741 | 0/022773308 | 0/03634282 | **1373** | 0/008152441 | 0/019029198 | 0/031876562 |
| 374 | 0/009286741 | 0/022773308 | 0/03634282 | **1374** | 0/008152441 | 0/019029198 | 0/031876562 |
| 375 | 0/009286741 | 0/022773308 | 0/03634282 | **1375** | 0/008152441 | 0/019029198 | 0/031876562 |
| 376 | 0/009286741 | 0/022773308 | 0/03634282 | **1376** | 0/008152441 | 0/019029198 | 0/031876562 |
| 377 | 0/009286741 | 0/022773308 | 0/03634282 | **1377** | 0/008152441 | 0/019029198 | 0/031876562 |
| 378 | 0/009286741 | 0/022773308 | 0/03634282 | **1378** | 0/008152441 | 0/019029198 | 0/031876562 |
| 379 | 0/009286741 | 0/022773308 | 0/03634282 | **1379** | 0/008152441 | 0/019029198 | 0/031876562 |
| 380 | 0/009286741 | 0/022773308 | 0/03634282 | **1380** | 0/008152441 | 0/019029198 | 0/031876562 |
| 381 | 0/009286741 | 0/022773308 | 0/03634282 | **1381** | 0/008152441 | 0/019029198 | 0/031876562 |
| 382 | 0/009286741 | 0/022773308 | 0/03634282 | **1382** | 0/008152441 | 0/019029198 | 0/031876562 |
| 383 | 0/009286741 | 0/022773308 | 0/03634282 | **1383** | 0/008152441 | 0/019029198 | 0/031876562 |
| 384 | 0/009286741 | 0/022773308 | 0/03634282 | **1384** | 0/008152441 | 0/019029198 | 0/031876562 |
| 385 | 0/009286741 | 0/022773308 | 0/03634282 | **1385** | 0/008152441 | 0/019029198 | 0/031876562 |
| 386 | 0/009286741 | 0/022773308 | 0/03634282 | **1386** | 0/008152441 | 0/019029198 | 0/031876562 |
| 387 | 0/009286741 | 0/022773308 | 0/03634282 | **1387** | 0/008152441 | 0/019029198 | 0/031876562 |
| 388 | 0/009286741 | 0/022773308 | 0/03634282 | **1388** | 0/008152441 | 0/019029198 | 0/031876562 |
| 389 | 0/009286741 | 0/022773308 | 0/03634282 | **1389** | 0/008152441 | 0/019029198 | 0/031876562 |
| 390 | 0/009286741 | 0/022773308 | 0/03634282 | **1390** | 0/008152441 | 0/019029198 | 0/031876562 |
| 391 | 0/009286741 | 0/022773308 | 0/03634282 | **1391** | 0/008078458 | 0/019029198 | 0/031876562 |
| 392 | 0/009286741 | 0/022773308 | 0/03634282 | **1392** | 0/008078458 | 0/019029198 | 0/031876562 |
| 393 | 0/009286741 | 0/022773308 | 0/03634282 | **1393** | 0/008078458 | 0/019029198 | 0/031876562 |
| 394 | 0/009286741 | 0/022773308 | 0/03634282 | **1394** | 0/008078458 | 0/019029198 | 0/031876562 |
| 395 | 0/009286741 | 0/022773308 | 0/03634282 | **1395** | 0/00787716 | 0/019029198 | 0/031876562 |
| 396 | 0/009286741 | 0/022773308 | 0/03634282 | **1396** | 0/00787716 | 0/019029198 | 0/031876562 |
| 397 | 0/009286741 | 0/022773308 | 0/03634282 | **1397** | 0/00787716 | 0/019029198 | 0/031876562 |
| 398 | 0/009286741 | 0/022773308 | 0/03634282 | **1398** | 0/00787716 | 0/019029198 | 0/031876562 |
| 399 | 0/009286741 | 0/022773308 | 0/03634282 | **1399** | 0/00787716 | 0/019029198 | 0/031876562 |
| 400 | 0/009286741 | 0/022773308 | 0/03634282 | **1400** | 0/00787716 | 0/019029198 | 0/031876562 |
| 401 | 0/009286741 | 0/022773308 | 0/03634282 | **1401** | 0/00787716 | 0/019029198 | 0/031876562 |
| 402 | 0/009286741 | 0/022773308 | 0/03634282 | **1402** | 0/00787716 | 0/019029198 | 0/031876562 |
| 403 | 0/009286741 | 0/022773308 | 0/03634282 | **1403** | 0/00787716 | 0/019029198 | 0/031876562 |
| 404 | 0/009286741 | 0/022773308 | 0/03634282 | **1404** | 0/00787716 | 0/019029198 | 0/031876562 |
| 405 | 0/009286741 | 0/022773308 | 0/03634282 | **1405** | 0/00787716 | 0/019029198 | 0/031876562 |
| 406 | 0/009286741 | 0/022773308 | 0/03634282 | **1406** | 0/00787716 | 0/019029198 | 0/031876562 |
| 407 | 0/009286741 | 0/022773308 | 0/03634282 | **1407** | 0/00787716 | 0/019029198 | 0/031876562 |
| 408 | 0/009286741 | 0/022773308 | 0/03634282 | **1408** | 0/00787716 | 0/019029198 | 0/031876562 |
| 409 | 0/009286741 | 0/022773308 | 0/03634282 | **1409** | 0/00787716 | 0/019029198 | 0/031876562 |
| 410 | 0/009286741 | 0/022773308 | 0/03634282 | **1410** | 0/00787716 | 0/019029198 | 0/031876562 |
| 411 | 0/009286741 | 0/022773308 | 0/03634282 | **1411** | 0/00787716 | 0/019029198 | 0/031876562 |
| 412 | 0/009286741 | 0/022773308 | 0/03634282 | **1412** | 0/00787716 | 0/019029198 | 0/031876562 |
| 413 | 0/009286741 | 0/022773308 | 0/03634282 | **1413** | 0/00787716 | 0/019029198 | 0/031876562 |
| 414 | 0/009286741 | 0/022773308 | 0/03634282 | **1414** | 0/00787716 | 0/019029198 | 0/031876562 |
| 415 | 0/009286741 | 0/022773308 | 0/03634282 | **1415** | 0/00787716 | 0/019029198 | 0/031876562 |
| 416 | 0/009286741 | 0/022773308 | 0/03634282 | **1416** | 0/00787716 | 0/019029198 | 0/031876562 |
| 417 | 0/009286741 | 0/022773308 | 0/03634282 | **1417** | 0/00787716 | 0/019029198 | 0/031876562 |
| 418 | 0/009286741 | 0/022773308 | 0/03634282 | **1418** | 0/00787716 | 0/019029198 | 0/031876562 |
| 419 | 0/009286741 | 0/022773308 | 0/03634282 | **1419** | 0/00787716 | 0/019029198 | 0/031876562 |
| 420 | 0/009286741 | 0/022773308 | 0/03634282 | **1420** | 0/00787716 | 0/019029198 | 0/031876562 |
| 421 | 0/009286741 | 0/022773308 | 0/03634282 | **1421** | 0/00787716 | 0/019029198 | 0/031876562 |
| 422 | 0/009286741 | 0/022773308 | 0/03634282 | **1422** | 0/00787716 | 0/019029198 | 0/031876562 |
| 423 | 0/009286741 | 0/022773308 | 0/03634282 | **1423** | 0/00787716 | 0/019029198 | 0/031876562 |
| 424 | 0/009286741 | 0/022773308 | 0/03634282 | **1424** | 0/00787716 | 0/019029198 | 0/031876562 |
| 425 | 0/009286741 | 0/022773308 | 0/03634282 | **1425** | 0/00787716 | 0/019029198 | 0/031876562 |
| 426 | 0/009286741 | 0/022773308 | 0/03634282 | **1426** | 0/00787716 | 0/019029198 | 0/031876562 |
| 427 | 0/009286741 | 0/022773308 | 0/03634282 | **1427** | 0/00787716 | 0/019029198 | 0/031876562 |
| 428 | 0/009286741 | 0/022773308 | 0/03634282 | **1428** | 0/00787716 | 0/019029198 | 0/031418937 |
| 429 | 0/009286741 | 0/022773308 | 0/03634282 | **1429** | 0/00787716 | 0/019029198 | 0/031418937 |
| 430 | 0/009286741 | 0/022773308 | 0/03634282 | **1430** | 0/00787716 | 0/019029198 | 0/031418937 |
| 431 | 0/009286741 | 0/022773308 | 0/03634282 | **1431** | 0/00787716 | 0/019029198 | 0/031418937 |
| 432 | 0/009286741 | 0/022773308 | 0/03634282 | **1432** | 0/00787716 | 0/019029198 | 0/031418937 |
| 433 | 0/009286741 | 0/022773308 | 0/03634282 | **1433** | 0/00787716 | 0/019029198 | 0/030657723 |
| 434 | 0/009286741 | 0/022773308 | 0/03634282 | **1434** | 0/00787716 | 0/019029198 | 0/030657723 |
| 435 | 0/009286741 | 0/022773308 | 0/03634282 | **1435** | 0/00787716 | 0/019029198 | 0/030657723 |
| 436 | 0/009286741 | 0/022773308 | 0/03634282 | **1436** | 0/00787716 | 0/019029198 | 0/030657723 |
| 437 | 0/009286741 | 0/022773308 | 0/035010222 | **1437** | 0/00787716 | 0/019029198 | 0/030657723 |
| 438 | 0/009286741 | 0/022773308 | 0/035010222 | **1438** | 0/00787716 | 0/019029198 | 0/030657723 |
| 439 | 0/009286741 | 0/022773308 | 0/035010222 | **1439** | 0/00787716 | 0/019029198 | 0/030657723 |
| 440 | 0/009286741 | 0/022773308 | 0/035010222 | **1440** | 0/00787716 | 0/018710126 | 0/030657723 |
| 441 | 0/009286741 | 0/022773308 | 0/035010222 | **1441** | 0/00787716 | 0/018710126 | 0/030657723 |
| 442 | 0/009286741 | 0/022773308 | 0/035010222 | **1442** | 0/00787716 | 0/018710126 | 0/030657723 |
| 443 | 0/009286741 | 0/022773308 | 0/035010222 | **1443** | 0/00787716 | 0/018710126 | 0/030657723 |
| 444 | 0/009286741 | 0/022773308 | 0/035010222 | **1444** | 0/00787716 | 0/018710126 | 0/030657723 |
| 445 | 0/009286741 | 0/022773308 | 0/035010222 | **1445** | 0/00787716 | 0/018710126 | 0/030657723 |
| 446 | 0/009286741 | 0/022773308 | 0/035010222 | **1446** | 0/00787716 | 0/018710126 | 0/030657723 |
| 447 | 0/009286741 | 0/022773308 | 0/035010222 | **1447** | 0/00787716 | 0/018710126 | 0/030657723 |
| 448 | 0/009286741 | 0/022693179 | 0/035010222 | **1448** | 0/00787716 | 0/018710126 | 0/030657723 |
| 449 | 0/009286741 | 0/022693179 | 0/035010222 | **1449** | 0/00787716 | 0/018710126 | 0/030657723 |
| 450 | 0/009286741 | 0/022693179 | 0/035010222 | **1450** | 0/00787716 | 0/018710126 | 0/030657723 |
| 451 | 0/009286741 | 0/022693179 | 0/035010222 | **1451** | 0/00787716 | 0/018710126 | 0/030657723 |
| 452 | 0/009286741 | 0/022693179 | 0/035010222 | **1452** | 0/00787716 | 0/018710126 | 0/030657723 |
| 453 | 0/009286741 | 0/022693179 | 0/035010222 | **1453** | 0/00787716 | 0/018710126 | 0/030657723 |
| 454 | 0/009286741 | 0/022693179 | 0/035010222 | **1454** | 0/00787716 | 0/018710126 | 0/030423162 |
| 455 | 0/009286741 | 0/022693179 | 0/035010222 | **1455** | 0/00787716 | 0/018710126 | 0/030423162 |
| 456 | 0/009286741 | 0/022693179 | 0/035010222 | **1456** | 0/00787716 | 0/018710126 | 0/030423162 |
| 457 | 0/009286741 | 0/022693179 | 0/035010222 | **1457** | 0/00787716 | 0/018710126 | 0/030423162 |
| 458 | 0/009286741 | 0/022693179 | 0/035010222 | **1458** | 0/007746015 | 0/018710126 | 0/030423162 |
| 459 | 0/009286741 | 0/022693179 | 0/035010222 | **1459** | 0/007746015 | 0/018710126 | 0/030423162 |
| 460 | 0/009286741 | 0/022693179 | 0/035010222 | **1460** | 0/007746015 | 0/018710126 | 0/028454686 |
| 461 | 0/009286741 | 0/022693179 | 0/035010222 | **1461** | 0/007746015 | 0/018693796 | 0/028454686 |
| 462 | 0/009286741 | 0/022693179 | 0/035010222 | **1462** | 0/007746015 | 0/018693796 | 0/028454686 |
| 463 | 0/009286741 | 0/022693179 | 0/035010222 | **1463** | 0/007746015 | 0/018693796 | 0/028454686 |
| 464 | 0/009286741 | 0/022693179 | 0/035010222 | **1464** | 0/007746015 | 0/018693796 | 0/028454686 |
| 465 | 0/009286741 | 0/022693179 | 0/035010222 | **1465** | 0/007746015 | 0/018693796 | 0/028454686 |
| 466 | 0/009286741 | 0/022693179 | 0/035010222 | **1466** | 0/007746015 | 0/018693796 | 0/028454686 |
| 467 | 0/009286741 | 0/022693179 | 0/035010222 | **1467** | 0/007746015 | 0/018693796 | 0/028454686 |
| 468 | 0/009286741 | 0/022693179 | 0/035010222 | **1468** | 0/007746015 | 0/018693796 | 0/028454686 |
| 469 | 0/009286741 | 0/022693179 | 0/035010222 | **1469** | 0/007746015 | 0/018693796 | 0/028454686 |
| 470 | 0/009286741 | 0/022693179 | 0/035010222 | **1470** | 0/007746015 | 0/018693796 | 0/028454686 |
| 471 | 0/009286741 | 0/022693179 | 0/035010222 | **1471** | 0/007746015 | 0/018693796 | 0/028454686 |
| 472 | 0/009286741 | 0/022693179 | 0/035010222 | **1472** | 0/007746015 | 0/018693796 | 0/028454686 |
| 473 | 0/009286741 | 0/022693179 | 0/035010222 | **1473** | 0/007746015 | 0/018693796 | 0/028454686 |
| 474 | 0/009286741 | 0/022693179 | 0/035010222 | **1474** | 0/007746015 | 0/018693796 | 0/028454686 |
| 475 | 0/009286741 | 0/022693179 | 0/035010222 | **1475** | 0/007746015 | 0/018693796 | 0/028454686 |
| 476 | 0/009286741 | 0/022693179 | 0/035010222 | **1476** | 0/007746015 | 0/018693796 | 0/028454686 |
| 477 | 0/009286741 | 0/020840354 | 0/035010222 | **1477** | 0/007746015 | 0/018693796 | 0/028454686 |
| 478 | 0/009286741 | 0/020840354 | 0/035010222 | **1478** | 0/007637603 | 0/018693796 | 0/028454686 |
| 479 | 0/009286741 | 0/020840354 | 0/035010222 | **1479** | 0/007637603 | 0/018693796 | 0/028454686 |
| 480 | 0/009286741 | 0/020840354 | 0/035010222 | **1480** | 0/007637603 | 0/018693796 | 0/028454686 |
| 481 | 0/009286741 | 0/020840354 | 0/035010222 | **1481** | 0/007637603 | 0/018693796 | 0/028454686 |
| 482 | 0/009286741 | 0/020840354 | 0/035010222 | **1482** | 0/007637603 | 0/018693796 | 0/028454686 |
| 483 | 0/009286741 | 0/020840354 | 0/035010222 | **1483** | 0/007637603 | 0/018693796 | 0/028454686 |
| 484 | 0/009286741 | 0/020840354 | 0/035010222 | **1484** | 0/007637603 | 0/018693796 | 0/028454686 |
| 485 | 0/009286741 | 0/020840354 | 0/035010222 | **1485** | 0/007637603 | 0/018693796 | 0/028454686 |
| 486 | 0/009286741 | 0/020840354 | 0/035010222 | **1486** | 0/007637603 | 0/018693796 | 0/028454686 |
| 487 | 0/009286741 | 0/020840354 | 0/035010222 | **1487** | 0/007637603 | 0/018693796 | 0/028454686 |
| 488 | 0/009286741 | 0/020840354 | 0/035010222 | **1488** | 0/007637603 | 0/018693796 | 0/028454686 |
| 489 | 0/009286741 | 0/020840354 | 0/035010222 | **1489** | 0/007637603 | 0/018693796 | 0/028454686 |
| 490 | 0/009286741 | 0/020840354 | 0/035010222 | **1490** | 0/007637603 | 0/018693796 | 0/028454686 |
| 491 | 0/009286741 | 0/020840354 | 0/035010222 | **1491** | 0/007637603 | 0/018693796 | 0/028454686 |
| 492 | 0/009286741 | 0/020840354 | 0/035010222 | **1492** | 0/007637603 | 0/018693796 | 0/028454686 |
| 493 | 0/009286741 | 0/020840354 | 0/035010222 | **1493** | 0/007637603 | 0/018693796 | 0/028454686 |
| 494 | 0/009286741 | 0/020840354 | 0/035010222 | **1494** | 0/007637603 | 0/018693796 | 0/028454686 |
| 495 | 0/009286741 | 0/020840354 | 0/035010222 | **1495** | 0/007637603 | 0/018693796 | 0/028454686 |
| 496 | 0/009286741 | 0/020840354 | 0/035010222 | **1496** | 0/007637603 | 0/018693796 | 0/028454686 |
| 497 | 0/009286741 | 0/020840354 | 0/035010222 | **1497** | 0/007637603 | 0/018693796 | 0/028454686 |
| 498 | 0/009286741 | 0/020840354 | 0/035010222 | **1498** | 0/007637603 | 0/018693796 | 0/028454686 |
| 499 | 0/009286741 | 0/020840354 | 0/035010222 | **1499** | 0/007637603 | 0/018693796 | 0/028454686 |
| 500 | 0/009286741 | 0/020840354 | 0/035010222 | **1500** | 0/007637603 | 0/018693796 | 0/028454686 |
| 501 | 0/009286741 | 0/020840354 | 0/035010222 | **1501** | 0/007637603 | 0/018693796 | 0/028454686 |
| 502 | 0/009286741 | 0/020840354 | 0/035010222 | **1502** | 0/007637603 | 0/018693796 | 0/028454686 |
| 503 | 0/009286741 | 0/020840354 | 0/035010222 | **1503** | 0/007637603 | 0/018693796 | 0/028454686 |
| 504 | 0/009286741 | 0/020840354 | 0/035010222 | **1504** | 0/007637603 | 0/018693796 | 0/028454686 |
| 505 | 0/009286741 | 0/020840354 | 0/035010222 | **1505** | 0/007637603 | 0/018693796 | 0/028454686 |
| 506 | 0/009286741 | 0/020840354 | 0/035010222 | **1506** | 0/007637603 | 0/018693796 | 0/028454686 |
| 507 | 0/009286741 | 0/020840354 | 0/035010222 | **1507** | 0/007637603 | 0/018693796 | 0/028454686 |
| 508 | 0/009286741 | 0/020840354 | 0/035010222 | **1508** | 0/007637603 | 0/018693796 | 0/028454686 |
| 509 | 0/009286741 | 0/020840354 | 0/035010222 | **1509** | 0/007637603 | 0/018693796 | 0/028454686 |
| 510 | 0/009286741 | 0/020840354 | 0/035010222 | **1510** | 0/007637603 | 0/018693796 | 0/028454686 |
| 511 | 0/009286741 | 0/020840354 | 0/035010222 | **1511** | 0/007637603 | 0/018693796 | 0/028454686 |
| 512 | 0/009286741 | 0/020840354 | 0/035010222 | **1512** | 0/007637603 | 0/018693796 | 0/028454686 |
| 513 | 0/009286741 | 0/020840354 | 0/035010222 | **1513** | 0/007637603 | 0/018693796 | 0/028454686 |
| 514 | 0/009286741 | 0/020840354 | 0/035010222 | **1514** | 0/007637603 | 0/018693796 | 0/028454686 |
| 515 | 0/009286741 | 0/020840354 | 0/035010222 | **1515** | 0/007637603 | 0/018693796 | 0/028454686 |
| 516 | 0/009286741 | 0/020840354 | 0/035010222 | **1516** | 0/007637603 | 0/018693796 | 0/028454686 |
| 517 | 0/009286741 | 0/020840354 | 0/035010222 | **1517** | 0/007637603 | 0/018693796 | 0/028454686 |
| 518 | 0/009286741 | 0/020840354 | 0/035010222 | **1518** | 0/007637603 | 0/018693796 | 0/028454686 |
| 519 | 0/009286741 | 0/020840354 | 0/035010222 | **1519** | 0/007637603 | 0/018693796 | 0/028454686 |
| 520 | 0/009286741 | 0/020840354 | 0/035010222 | **1520** | 0/007637603 | 0/018693796 | 0/028454686 |
| 521 | 0/009286741 | 0/020840354 | 0/035010222 | **1521** | 0/007637603 | 0/018693796 | 0/028454686 |
| 522 | 0/009286741 | 0/020840354 | 0/035010222 | **1522** | 0/007637603 | 0/018693796 | 0/028454686 |
| 523 | 0/009286741 | 0/020840354 | 0/035010222 | **1523** | 0/007637603 | 0/018693796 | 0/028454686 |
| 524 | 0/009286741 | 0/020840354 | 0/035010222 | **1524** | 0/007637603 | 0/018693796 | 0/028454686 |
| 525 | 0/009286741 | 0/020840354 | 0/035010222 | **1525** | 0/007637603 | 0/018693796 | 0/028454686 |
| 526 | 0/009286741 | 0/020840354 | 0/035010222 | **1526** | 0/007637603 | 0/018693796 | 0/028454686 |
| 527 | 0/009286741 | 0/020840354 | 0/035010222 | **1527** | 0/007637603 | 0/018693796 | 0/028454686 |
| 528 | 0/009286741 | 0/020840354 | 0/035010222 | **1528** | 0/007637603 | 0/018693796 | 0/028454686 |
| 529 | 0/009286741 | 0/020840354 | 0/035010222 | **1529** | 0/007637603 | 0/018693796 | 0/028454686 |
| 530 | 0/009286741 | 0/020840354 | 0/035010222 | **1530** | 0/007637603 | 0/018693796 | 0/028454686 |
| 531 | 0/009286741 | 0/020840354 | 0/035010222 | **1531** | 0/007637603 | 0/018693796 | 0/028454686 |
| 532 | 0/009286741 | 0/020840354 | 0/035010222 | **1532** | 0/007637603 | 0/018693796 | 0/028454686 |
| 533 | 0/009286741 | 0/020840354 | 0/035010222 | **1533** | 0/007637603 | 0/018693796 | 0/028454686 |
| 534 | 0/009286741 | 0/020840354 | 0/035010222 | **1534** | 0/007637603 | 0/018693796 | 0/028454686 |
| 535 | 0/009286741 | 0/020840354 | 0/035010222 | **1535** | 0/007637603 | 0/018693796 | 0/028454686 |
| 536 | 0/009286741 | 0/020840354 | 0/035010222 | **1536** | 0/007637603 | 0/018693796 | 0/028454686 |
| 537 | 0/009286741 | 0/020840354 | 0/035010222 | **1537** | 0/007637603 | 0/018681466 | 0/028454686 |
| 538 | 0/009286741 | 0/020840354 | 0/035010222 | **1538** | 0/007637603 | 0/018681466 | 0/028454686 |
| 539 | 0/009286741 | 0/020840354 | 0/035010222 | **1539** | 0/007637603 | 0/018681466 | 0/028454686 |
| 540 | 0/009286741 | 0/020840354 | 0/035010222 | **1540** | 0/007637603 | 0/018681466 | 0/028454686 |
| 541 | 0/009286741 | 0/020840354 | 0/035010222 | **1541** | 0/007637603 | 0/018681466 | 0/028454686 |
| 542 | 0/009286741 | 0/020840354 | 0/035010222 | **1542** | 0/007637603 | 0/018681466 | 0/028454686 |
| 543 | 0/009286741 | 0/020840354 | 0/035010222 | **1543** | 0/007637603 | 0/018681466 | 0/028454686 |
| 544 | 0/009286741 | 0/020840354 | 0/035010222 | **1544** | 0/007637603 | 0/018681466 | 0/028454686 |
| 545 | 0/009286741 | 0/020840354 | 0/035010222 | **1545** | 0/007637603 | 0/018681466 | 0/028454686 |
| 546 | 0/009286741 | 0/020840354 | 0/035010222 | **1546** | 0/007637603 | 0/018681466 | 0/028454686 |
| 547 | 0/009286741 | 0/020840354 | 0/035010222 | **1547** | 0/007637603 | 0/018681466 | 0/028454686 |
| 548 | 0/009286741 | 0/020840354 | 0/035010222 | **1548** | 0/007637603 | 0/018681466 | 0/028454686 |
| 549 | 0/009286741 | 0/020840354 | 0/035010222 | **1549** | 0/007637603 | 0/018681466 | 0/028454686 |
| 550 | 0/009286741 | 0/020840354 | 0/035010222 | **1550** | 0/007637603 | 0/018681466 | 0/028454686 |
| 551 | 0/009286741 | 0/020840354 | 0/035010222 | **1551** | 0/007637603 | 0/018681466 | 0/028454686 |
| 552 | 0/009286741 | 0/020840354 | 0/035010222 | **1552** | 0/007637603 | 0/018681466 | 0/028454686 |
| 553 | 0/009286741 | 0/020840354 | 0/035010222 | **1553** | 0/007556865 | 0/018681466 | 0/028454686 |
| 554 | 0/009286741 | 0/020840354 | 0/035010222 | **1554** | 0/007556865 | 0/018681466 | 0/028454686 |
| 555 | 0/009286741 | 0/020840354 | 0/035010222 | **1555** | 0/007556865 | 0/018681466 | 0/028454686 |
| 556 | 0/009286741 | 0/020840354 | 0/035010222 | **1556** | 0/00740477 | 0/018681466 | 0/028454686 |
| 557 | 0/009286741 | 0/020840354 | 0/035010222 | **1557** | 0/00740477 | 0/018681466 | 0/028454686 |
| 558 | 0/009286741 | 0/020840354 | 0/035010222 | **1558** | 0/00740477 | 0/018681466 | 0/028454686 |
| 559 | 0/009286741 | 0/020840354 | 0/035010222 | **1559** | 0/00740477 | 0/018681466 | 0/028454686 |
| 560 | 0/009286741 | 0/020840354 | 0/035010222 | **1560** | 0/00740477 | 0/018681466 | 0/028454686 |
| 561 | 0/009286741 | 0/020840354 | 0/035010222 | **1561** | 0/00740477 | 0/018681466 | 0/028454686 |
| 562 | 0/009286741 | 0/020840354 | 0/035010222 | **1562** | 0/00740477 | 0/018681466 | 0/028454686 |
| 563 | 0/009286741 | 0/020840354 | 0/035010222 | **1563** | 0/00740477 | 0/018681466 | 0/028454686 |
| 564 | 0/009286741 | 0/020840354 | 0/035010222 | **1564** | 0/00740477 | 0/018681466 | 0/028454686 |
| 565 | 0/009286741 | 0/020840354 | 0/035010222 | **1565** | 0/00740477 | 0/018681466 | 0/028454686 |
| 566 | 0/009286741 | 0/020840354 | 0/035010222 | **1566** | 0/00740477 | 0/018681466 | 0/028454686 |
| 567 | 0/009286741 | 0/020840354 | 0/035010222 | **1567** | 0/00740477 | 0/018681466 | 0/028454686 |
| 568 | 0/009286741 | 0/020840354 | 0/035010222 | **1568** | 0/00740477 | 0/018681466 | 0/028454686 |
| 569 | 0/009286741 | 0/020840354 | 0/035010222 | **1569** | 0/00740477 | 0/018472383 | 0/028454686 |
| 570 | 0/009286741 | 0/020840354 | 0/035010222 | **1570** | 0/00740477 | 0/018472383 | 0/028454686 |
| 571 | 0/009286741 | 0/020840354 | 0/035010222 | **1571** | 0/00740477 | 0/018472383 | 0/028454686 |
| 572 | 0/009286741 | 0/020840354 | 0/035010222 | **1572** | 0/00740477 | 0/018472383 | 0/028454686 |
| 573 | 0/009286741 | 0/020840354 | 0/035010222 | **1573** | 0/00740477 | 0/018472383 | 0/028454686 |
| 574 | 0/009286741 | 0/020840354 | 0/035010222 | **1574** | 0/00740477 | 0/018472383 | 0/02835879 |
| 575 | 0/009286741 | 0/020840354 | 0/035010222 | **1575** | 0/00740477 | 0/018472383 | 0/02835879 |
| 576 | 0/009286741 | 0/020840354 | 0/035010222 | **1576** | 0/00740477 | 0/018472383 | 0/02835879 |
| 577 | 0/009286741 | 0/020840354 | 0/035010222 | **1577** | 0/00740477 | 0/018472383 | 0/02835879 |
| 578 | 0/009286741 | 0/020840354 | 0/035010222 | **1578** | 0/00740477 | 0/018472383 | 0/02835879 |
| 579 | 0/009286741 | 0/020840354 | 0/035010222 | **1579** | 0/00740477 | 0/018472383 | 0/02835879 |
| 580 | 0/009286741 | 0/020840354 | 0/035010222 | **1580** | 0/00740477 | 0/018472383 | 0/02835879 |
| 581 | 0/009286741 | 0/020840354 | 0/035010222 | **1581** | 0/00740477 | 0/018472383 | 0/02835879 |
| 582 | 0/009286741 | 0/020840354 | 0/035010222 | **1582** | 0/00740477 | 0/018472383 | 0/02835879 |
| 583 | 0/009286741 | 0/020840354 | 0/035010222 | **1583** | 0/00740477 | 0/018472383 | 0/02835879 |
| 584 | 0/009286741 | 0/020840354 | 0/035010222 | **1584** | 0/00740477 | 0/018472383 | 0/02835879 |
| 585 | 0/009286741 | 0/020840354 | 0/035010222 | **1585** | 0/00740477 | 0/018472383 | 0/02835879 |
| 586 | 0/009286741 | 0/020840354 | 0/035010222 | **1586** | 0/00740477 | 0/018472383 | 0/02835879 |
| 587 | 0/009286741 | 0/020840354 | 0/035010222 | **1587** | 0/00740477 | 0/018472383 | 0/02835879 |
| 588 | 0/009286741 | 0/020840354 | 0/035010222 | **1588** | 0/00740477 | 0/018472383 | 0/02835879 |
| 589 | 0/009286741 | 0/020840354 | 0/035010222 | **1589** | 0/00740477 | 0/018472383 | 0/02835879 |
| 590 | 0/009286741 | 0/020840354 | 0/035010222 | **1590** | 0/00740477 | 0/018472383 | 0/02835879 |
| 591 | 0/009286741 | 0/020840354 | 0/035010222 | **1591** | 0/00740477 | 0/018472383 | 0/02835879 |
| 592 | 0/009286741 | 0/020840354 | 0/035010222 | **1592** | 0/00740477 | 0/018472383 | 0/02835879 |
| 593 | 0/009286741 | 0/020840354 | 0/035010222 | **1593** | 0/00740477 | 0/018472383 | 0/02835879 |
| 594 | 0/009286741 | 0/020840354 | 0/035010222 | **1594** | 0/00740477 | 0/018472383 | 0/02835879 |
| 595 | 0/009286741 | 0/020840354 | 0/035010222 | **1595** | 0/00740477 | 0/018472383 | 0/02835879 |
| 596 | 0/009286741 | 0/020840354 | 0/035010222 | **1596** | 0/00740477 | 0/018472383 | 0/02835879 |
| 597 | 0/009286741 | 0/020840354 | 0/035010222 | **1597** | 0/00740477 | 0/018472383 | 0/02835879 |
| 598 | 0/009286741 | 0/020840354 | 0/035010222 | **1598** | 0/00740477 | 0/018472383 | 0/02835879 |
| 599 | 0/009286741 | 0/020840354 | 0/035010222 | **1599** | 0/00740477 | 0/018472383 | 0/02835879 |
| 600 | 0/009286741 | 0/020840354 | 0/035010222 | **1600** | 0/00740477 | 0/018472383 | 0/02835879 |
| 601 | 0/009286741 | 0/020840354 | 0/035010222 | **1601** | 0/00740477 | 0/018472383 | 0/02835879 |
| 602 | 0/009286741 | 0/020840354 | 0/035010222 | **1602** | 0/00740477 | 0/018472383 | 0/02835879 |
| 603 | 0/009286741 | 0/020840354 | 0/035010222 | **1603** | 0/007372518 | 0/018472383 | 0/02835879 |
| 604 | 0/009286741 | 0/020840354 | 0/035010222 | **1604** | 0/007372518 | 0/018472383 | 0/02835879 |
| 605 | 0/009286741 | 0/020840354 | 0/035010222 | **1605** | 0/007372518 | 0/018472383 | 0/02835879 |
| 606 | 0/009286741 | 0/020840354 | 0/035010222 | **1606** | 0/007372518 | 0/018472383 | 0/02835879 |
| 607 | 0/009286741 | 0/020840354 | 0/035010222 | **1607** | 0/007372518 | 0/018472383 | 0/02835879 |
| 608 | 0/009286741 | 0/020840354 | 0/035010222 | **1608** | 0/007372518 | 0/018472383 | 0/02835879 |
| 609 | 0/009286741 | 0/020840354 | 0/035010222 | **1609** | 0/007372518 | 0/018472383 | 0/02835879 |
| 610 | 0/009286741 | 0/020840354 | 0/035010222 | **1610** | 0/007372518 | 0/018472383 | 0/02835879 |
| 611 | 0/009286741 | 0/020840354 | 0/035010222 | **1611** | 0/007372518 | 0/018472383 | 0/02835879 |
| 612 | 0/009286741 | 0/020840354 | 0/035010222 | **1612** | 0/007372518 | 0/018472383 | 0/02835879 |
| 613 | 0/009286741 | 0/020840354 | 0/035010222 | **1613** | 0/007372518 | 0/018472383 | 0/02835879 |
| 614 | 0/009286741 | 0/020840354 | 0/035010222 | **1614** | 0/007372518 | 0/018472383 | 0/02835879 |
| 615 | 0/009286741 | 0/020840354 | 0/035010222 | **1615** | 0/007372518 | 0/018472383 | 0/02835879 |
| 616 | 0/009286741 | 0/020840354 | 0/035010222 | **1616** | 0/007372518 | 0/018472383 | 0/02835879 |
| 617 | 0/009286741 | 0/020840354 | 0/035010222 | **1617** | 0/007372518 | 0/018472383 | 0/02835879 |
| 618 | 0/009286741 | 0/020840354 | 0/035010222 | **1618** | 0/007372518 | 0/018472383 | 0/02835879 |
| 619 | 0/009286741 | 0/020840354 | 0/035010222 | **1619** | 0/007372518 | 0/018472383 | 0/02835879 |
| 620 | 0/009286741 | 0/020840354 | 0/035010222 | **1620** | 0/007372518 | 0/018464978 | 0/02835879 |
| 621 | 0/009286741 | 0/020840354 | 0/035010222 | **1621** | 0/007372518 | 0/018464978 | 0/02835879 |
| 622 | 0/009286741 | 0/020840354 | 0/035010222 | **1622** | 0/007372518 | 0/018464978 | 0/02835879 |
| 623 | 0/009286741 | 0/020840354 | 0/035010222 | **1623** | 0/007372518 | 0/018464978 | 0/02835879 |
| 624 | 0/009286741 | 0/020840354 | 0/035010222 | **1624** | 0/007372518 | 0/018464978 | 0/02835879 |
| 625 | 0/009286741 | 0/020840354 | 0/035010222 | **1625** | 0/007372518 | 0/018464978 | 0/02835879 |
| 626 | 0/009286741 | 0/020840354 | 0/035010222 | **1626** | 0/007372518 | 0/018464978 | 0/02835879 |
| 627 | 0/009286741 | 0/020840354 | 0/035010222 | **1627** | 0/007372518 | 0/018464978 | 0/02835879 |
| 628 | 0/009286741 | 0/020840354 | 0/035010222 | **1628** | 0/007372518 | 0/018464978 | 0/02835879 |
| 629 | 0/009286741 | 0/020840354 | 0/035010222 | **1629** | 0/007372518 | 0/018464978 | 0/02835879 |
| 630 | 0/009286741 | 0/020840354 | 0/035010222 | **1630** | 0/007372518 | 0/018464978 | 0/02835879 |
| 631 | 0/009286741 | 0/020840354 | 0/035010222 | **1631** | 0/007372518 | 0/018464978 | 0/02835879 |
| 632 | 0/009286741 | 0/020840354 | 0/035010222 | **1632** | 0/007372518 | 0/018464978 | 0/02835879 |
| 633 | 0/009286741 | 0/020840354 | 0/035010222 | **1633** | 0/007372518 | 0/018464978 | 0/02835879 |
| 634 | 0/009286741 | 0/020840354 | 0/035010222 | **1634** | 0/007372518 | 0/018464978 | 0/02835879 |
| 635 | 0/009286741 | 0/020840354 | 0/035010222 | **1635** | 0/007372518 | 0/018464978 | 0/02835879 |
| 636 | 0/009286741 | 0/020840354 | 0/035010222 | **1636** | 0/007372518 | 0/018464978 | 0/02835879 |
| 637 | 0/009286741 | 0/020840354 | 0/035010222 | **1637** | 0/007372518 | 0/018464978 | 0/02835879 |
| 638 | 0/009286741 | 0/020840354 | 0/035010222 | **1638** | 0/007372518 | 0/018464978 | 0/02835879 |
| 639 | 0/009286741 | 0/020840354 | 0/035010222 | **1639** | 0/007372518 | 0/018464978 | 0/02835879 |
| 640 | 0/009286741 | 0/020840354 | 0/035010222 | **1640** | 0/007372518 | 0/018464978 | 0/02835879 |
| 641 | 0/009286741 | 0/020840354 | 0/035010222 | **1641** | 0/007372518 | 0/018464978 | 0/02835879 |
| 642 | 0/009286741 | 0/020840354 | 0/035010222 | **1642** | 0/007372518 | 0/018464978 | 0/02835879 |
| 643 | 0/009286741 | 0/020840354 | 0/035010222 | **1643** | 0/007372518 | 0/018464978 | 0/02835879 |
| 644 | 0/009286741 | 0/020840354 | 0/035010222 | **1644** | 0/007372518 | 0/018464978 | 0/02835879 |
| 645 | 0/009286741 | 0/020840354 | 0/035010222 | **1645** | 0/007372518 | 0/018464978 | 0/02835879 |
| 646 | 0/009286741 | 0/020840354 | 0/035010222 | **1646** | 0/007372518 | 0/018464978 | 0/02835879 |
| 647 | 0/009286741 | 0/020446019 | 0/035010222 | **1647** | 0/007372518 | 0/018464978 | 0/02835879 |
| 648 | 0/009286741 | 0/020446019 | 0/035010222 | **1648** | 0/007372518 | 0/018464978 | 0/02835879 |
| 649 | 0/009286741 | 0/020446019 | 0/035010222 | **1649** | 0/007372518 | 0/018464978 | 0/02835879 |
| 650 | 0/009286741 | 0/020446019 | 0/035010222 | **1650** | 0/007372518 | 0/018464978 | 0/02835879 |
| 651 | 0/009286741 | 0/020446019 | 0/035010222 | **1651** | 0/007372518 | 0/018464978 | 0/02835879 |
| 652 | 0/009286741 | 0/020446019 | 0/035010222 | **1652** | 0/007372518 | 0/018464978 | 0/02835879 |
| 653 | 0/009286741 | 0/020446019 | 0/035010222 | **1653** | 0/007372518 | 0/018464978 | 0/02835879 |
| 654 | 0/009286741 | 0/020446019 | 0/035010222 | **1654** | 0/007372518 | 0/018464978 | 0/02835879 |
| 655 | 0/009286741 | 0/020446019 | 0/035010222 | **1655** | 0/007372518 | 0/018464978 | 0/02835879 |
| 656 | 0/009286741 | 0/020446019 | 0/035010222 | **1656** | 0/007372518 | 0/018464978 | 0/02835879 |
| 657 | 0/009286741 | 0/020446019 | 0/035010222 | **1657** | 0/007372518 | 0/018464978 | 0/02835879 |
| 658 | 0/009286741 | 0/020446019 | 0/035010222 | **1658** | 0/007372518 | 0/018464978 | 0/02835879 |
| 659 | 0/009286741 | 0/020446019 | 0/035010222 | **1659** | 0/007372518 | 0/018464978 | 0/02835879 |
| 660 | 0/009286741 | 0/020446019 | 0/035010222 | **1660** | 0/007372518 | 0/018464978 | 0/02835879 |
| 661 | 0/009286741 | 0/020446019 | 0/035010222 | **1661** | 0/007372518 | 0/018464978 | 0/02835879 |
| 662 | 0/009286741 | 0/020446019 | 0/035010222 | **1662** | 0/007372518 | 0/018464978 | 0/02835879 |
| 663 | 0/009286741 | 0/020446019 | 0/035010222 | **1663** | 0/007372518 | 0/018464978 | 0/02835879 |
| 664 | 0/009286741 | 0/020446019 | 0/035010222 | **1664** | 0/007372518 | 0/018464978 | 0/027684613 |
| 665 | 0/009286741 | 0/020446019 | 0/035010222 | **1665** | 0/007278863 | 0/018464978 | 0/027684613 |
| 666 | 0/009286741 | 0/020446019 | 0/035010222 | **1666** | 0/007278863 | 0/018464978 | 0/027684613 |
| 667 | 0/009286741 | 0/020446019 | 0/035010222 | **1667** | 0/007278863 | 0/018464978 | 0/027684613 |
| 668 | 0/009286741 | 0/020446019 | 0/035010222 | **1668** | 0/007278863 | 0/018464978 | 0/027684613 |
| 669 | 0/009286741 | 0/020446019 | 0/035010222 | **1669** | 0/007278863 | 0/018464978 | 0/027684613 |
| 670 | 0/009286741 | 0/020446019 | 0/035010222 | **1670** | 0/007278863 | 0/018464978 | 0/027684613 |
| 671 | 0/009286741 | 0/020446019 | 0/035010222 | **1671** | 0/007278863 | 0/018464978 | 0/027684613 |
| 672 | 0/009286741 | 0/020446019 | 0/035010222 | **1672** | 0/007278863 | 0/018464978 | 0/027684613 |
| 673 | 0/009286741 | 0/020446019 | 0/035010222 | **1673** | 0/007278863 | 0/018464978 | 0/027684613 |
| 674 | 0/009286741 | 0/020446019 | 0/035010222 | **1674** | 0/007278863 | 0/018464978 | 0/027684613 |
| 675 | 0/009286741 | 0/020446019 | 0/035010222 | **1675** | 0/007278863 | 0/018464978 | 0/027684613 |
| 676 | 0/009286741 | 0/020446019 | 0/035010222 | **1676** | 0/007278863 | 0/018464978 | 0/027684613 |
| 677 | 0/009286741 | 0/020446019 | 0/035010222 | **1677** | 0/007278863 | 0/018464978 | 0/027684613 |
| 678 | 0/009286741 | 0/020446019 | 0/035010222 | **1678** | 0/007278863 | 0/018464978 | 0/027684613 |
| 679 | 0/009286741 | 0/020446019 | 0/035010222 | **1679** | 0/007278863 | 0/018464978 | 0/027684613 |
| 680 | 0/009286741 | 0/020446019 | 0/035010222 | **1680** | 0/007278863 | 0/018464978 | 0/027684613 |
| 681 | 0/009286741 | 0/020446019 | 0/035010222 | **1681** | 0/007278863 | 0/018464978 | 0/027684613 |
| 682 | 0/009286741 | 0/020446019 | 0/035010222 | **1682** | 0/007278863 | 0/018464978 | 0/027684613 |
| 683 | 0/009286741 | 0/020446019 | 0/035010222 | **1683** | 0/007278863 | 0/018464978 | 0/027684613 |
| 684 | 0/009286741 | 0/020446019 | 0/035010222 | **1684** | 0/007278863 | 0/018464978 | 0/027684613 |
| 685 | 0/009286741 | 0/020446019 | 0/035010222 | **1685** | 0/007278863 | 0/018464978 | 0/027684613 |
| 686 | 0/009286741 | 0/020446019 | 0/035010222 | **1686** | 0/007278863 | 0/018464978 | 0/027684613 |
| 687 | 0/009286741 | 0/020446019 | 0/035010222 | **1687** | 0/007278863 | 0/018464978 | 0/027684613 |
| 688 | 0/009286741 | 0/020446019 | 0/035010222 | **1688** | 0/007278863 | 0/018464978 | 0/027684613 |
| 689 | 0/009286741 | 0/020446019 | 0/035010222 | **1689** | 0/007278863 | 0/018464978 | 0/027684613 |
| 690 | 0/009286741 | 0/020446019 | 0/035010222 | **1690** | 0/007278863 | 0/018464978 | 0/027684613 |
| 691 | 0/009286741 | 0/020446019 | 0/035010222 | **1691** | 0/007278863 | 0/018464978 | 0/027684613 |
| 692 | 0/009286741 | 0/020446019 | 0/035010222 | **1692** | 0/007278863 | 0/018464978 | 0/027684613 |
| 693 | 0/009286741 | 0/020446019 | 0/035010222 | **1693** | 0/007278863 | 0/018464978 | 0/027684613 |
| 694 | 0/009286741 | 0/020446019 | 0/035010222 | **1694** | 0/007278863 | 0/018464978 | 0/027684613 |
| 695 | 0/009286741 | 0/020446019 | 0/035010222 | **1695** | 0/007278863 | 0/018464978 | 0/027684613 |
| 696 | 0/009286741 | 0/020446019 | 0/035010222 | **1696** | 0/007278863 | 0/018464978 | 0/027684613 |
| 697 | 0/009286741 | 0/020446019 | 0/035010222 | **1697** | 0/007278863 | 0/018464978 | 0/027684613 |
| 698 | 0/009286741 | 0/020446019 | 0/035010222 | **1698** | 0/007278863 | 0/018464978 | 0/027684613 |
| 699 | 0/009286741 | 0/020446019 | 0/035010222 | **1699** | 0/007278863 | 0/018464978 | 0/027684613 |
| 700 | 0/009286741 | 0/020446019 | 0/035010222 | **1700** | 0/007278863 | 0/018464978 | 0/027684613 |
| 701 | 0/009286741 | 0/020446019 | 0/035010222 | **1701** | 0/007278863 | 0/018464978 | 0/027684613 |
| 702 | 0/009286741 | 0/020446019 | 0/035010222 | **1702** | 0/007278863 | 0/018464978 | 0/027684613 |
| 703 | 0/009286741 | 0/020446019 | 0/035010222 | **1703** | 0/007278863 | 0/018464978 | 0/027684613 |
| 704 | 0/009286741 | 0/020446019 | 0/035010222 | **1704** | 0/007278863 | 0/018464978 | 0/027684613 |
| 705 | 0/009286741 | 0/020446019 | 0/035010222 | **1705** | 0/007278863 | 0/018464978 | 0/027684613 |
| 706 | 0/009286741 | 0/020446019 | 0/035010222 | **1706** | 0/007278863 | 0/018464978 | 0/027684613 |
| 707 | 0/009286741 | 0/020446019 | 0/035010222 | **1707** | 0/007278863 | 0/018464978 | 0/027684613 |
| 708 | 0/009286741 | 0/020446019 | 0/035010222 | **1708** | 0/007278863 | 0/018464978 | 0/027684613 |
| 709 | 0/009286741 | 0/020446019 | 0/035010222 | **1709** | 0/007230373 | 0/018464978 | 0/027684613 |
| 710 | 0/009286741 | 0/020446019 | 0/035010222 | **1710** | 0/007230373 | 0/018464978 | 0/027684613 |
| 711 | 0/009286741 | 0/020446019 | 0/035010222 | **1711** | 0/007230373 | 0/018464978 | 0/027684613 |
| 712 | 0/009286741 | 0/020446019 | 0/035010222 | **1712** | 0/007230373 | 0/018464978 | 0/027684613 |
| 713 | 0/009286741 | 0/020446019 | 0/035010222 | **1713** | 0/007230373 | 0/018464978 | 0/027684613 |
| 714 | 0/009286741 | 0/020446019 | 0/035010222 | **1714** | 0/007230373 | 0/018464978 | 0/027684613 |
| 715 | 0/009286741 | 0/020446019 | 0/035010222 | **1715** | 0/007230373 | 0/018464978 | 0/027684613 |
| 716 | 0/009286741 | 0/020446019 | 0/035010222 | **1716** | 0/007230373 | 0/018458307 | 0/027684613 |
| 717 | 0/009286741 | 0/020446019 | 0/035010222 | **1717** | 0/007230373 | 0/018458307 | 0/027684613 |
| 718 | 0/009286741 | 0/020446019 | 0/035010222 | **1718** | 0/007230373 | 0/018168139 | 0/027684613 |
| 719 | 0/009286741 | 0/020446019 | 0/035010222 | **1719** | 0/007230373 | 0/018168139 | 0/027684613 |
| 720 | 0/009286741 | 0/020446019 | 0/035010222 | **1720** | 0/007230373 | 0/018168139 | 0/027684613 |
| 721 | 0/009286741 | 0/020446019 | 0/035010222 | **1721** | 0/007230373 | 0/018168139 | 0/027684613 |
| 722 | 0/009286741 | 0/020446019 | 0/035010222 | **1722** | 0/007230373 | 0/018168139 | 0/027684613 |
| 723 | 0/009286741 | 0/020446019 | 0/035010222 | **1723** | 0/007230373 | 0/018168139 | 0/027593949 |
| 724 | 0/009286741 | 0/020446019 | 0/035010222 | **1724** | 0/007230373 | 0/018168139 | 0/027593949 |
| 725 | 0/009286741 | 0/020446019 | 0/035010222 | **1725** | 0/007230373 | 0/018168139 | 0/027593949 |
| 726 | 0/009286741 | 0/020446019 | 0/035010222 | **1726** | 0/007230373 | 0/018168139 | 0/027593949 |
| 727 | 0/009286741 | 0/020446019 | 0/035010222 | **1727** | 0/007230373 | 0/018168139 | 0/027593949 |
| 728 | 0/009286741 | 0/020446019 | 0/035010222 | **1728** | 0/007230373 | 0/018168139 | 0/027593949 |
| 729 | 0/009286741 | 0/020446019 | 0/035010222 | **1729** | 0/007230373 | 0/018168139 | 0/027593949 |
| 730 | 0/009286741 | 0/020446019 | 0/035010222 | **1730** | 0/007230373 | 0/018168139 | 0/027593949 |
| 731 | 0/009286741 | 0/020446019 | 0/035010222 | **1731** | 0/007230373 | 0/018168139 | 0/027593949 |
| 732 | 0/009286741 | 0/019967557 | 0/035010222 | **1732** | 0/007230373 | 0/018168139 | 0/027593949 |
| 733 | 0/009286741 | 0/019967557 | 0/035010222 | **1733** | 0/007230373 | 0/018168139 | 0/027593949 |
| 734 | 0/009286741 | 0/019967557 | 0/035010222 | **1734** | 0/007230373 | 0/018168139 | 0/027593949 |
| 735 | 0/009286741 | 0/019967557 | 0/035010222 | **1735** | 0/007230373 | 0/018168139 | 0/027593949 |
| 736 | 0/009286741 | 0/019967557 | 0/035010222 | **1736** | 0/007230373 | 0/018168139 | 0/027593949 |
| 737 | 0/009286741 | 0/019967557 | 0/035010222 | **1737** | 0/007230373 | 0/018168139 | 0/027593949 |
| 738 | 0/009286741 | 0/019967557 | 0/035010222 | **1738** | 0/007230373 | 0/018168139 | 0/027593949 |
| 739 | 0/009286741 | 0/019967557 | 0/035010222 | **1739** | 0/007230373 | 0/018168139 | 0/027593949 |
| 740 | 0/009286741 | 0/019967557 | 0/035010222 | **1740** | 0/007230373 | 0/018168139 | 0/027593949 |
| 741 | 0/009286741 | 0/019967557 | 0/035010222 | **1741** | 0/007230373 | 0/018168139 | 0/027593949 |
| 742 | 0/009286741 | 0/019967557 | 0/035010222 | **1742** | 0/007230373 | 0/018168139 | 0/027593949 |
| 743 | 0/009286741 | 0/019967557 | 0/035010222 | **1743** | 0/007230373 | 0/018168139 | 0/027593949 |
| 744 | 0/009286741 | 0/019967557 | 0/035010222 | **1744** | 0/007230373 | 0/018168139 | 0/027593949 |
| 745 | 0/009286741 | 0/019967557 | 0/035010222 | **1745** | 0/007230373 | 0/018168139 | 0/027593949 |
| 746 | 0/009286741 | 0/019967557 | 0/035010222 | **1746** | 0/007230373 | 0/018168139 | 0/027593949 |
| 747 | 0/009286741 | 0/019967557 | 0/035010222 | **1747** | 0/007230373 | 0/018168139 | 0/027593949 |
| 748 | 0/009286741 | 0/019967557 | 0/035010222 | **1748** | 0/007230373 | 0/018168139 | 0/027593949 |
| 749 | 0/009286741 | 0/019967557 | 0/035010222 | **1749** | 0/007230373 | 0/018168139 | 0/027593949 |
| 750 | 0/009286741 | 0/019967557 | 0/035010222 | **1750** | 0/007230373 | 0/018168139 | 0/027593949 |
| 751 | 0/009286741 | 0/019967557 | 0/035010222 | **1751** | 0/007230373 | 0/018168139 | 0/027593949 |
| 752 | 0/009286741 | 0/019967557 | 0/035010222 | **1752** | 0/007230373 | 0/018168139 | 0/027593949 |
| 753 | 0/009286741 | 0/019967557 | 0/035010222 | **1753** | 0/007230373 | 0/018168139 | 0/027593949 |
| 754 | 0/009286741 | 0/019967557 | 0/035010222 | **1754** | 0/007230373 | 0/018168139 | 0/027593949 |
| 755 | 0/009286741 | 0/019967557 | 0/035010222 | **1755** | 0/007230373 | 0/018168139 | 0/027593949 |
| 756 | 0/009286741 | 0/019967557 | 0/035010222 | **1756** | 0/007230373 | 0/018168139 | 0/027593949 |
| 757 | 0/009286741 | 0/019967557 | 0/035010222 | **1757** | 0/007230373 | 0/018168139 | 0/027593949 |
| 758 | 0/009286741 | 0/019967557 | 0/035010222 | **1758** | 0/007230373 | 0/018168139 | 0/027593949 |
| 759 | 0/009286741 | 0/019967557 | 0/035010222 | **1759** | 0/007230373 | 0/018168139 | 0/027593949 |
| 760 | 0/009286741 | 0/019967557 | 0/035010222 | **1760** | 0/007230373 | 0/018168139 | 0/027593949 |
| 761 | 0/009286741 | 0/019967557 | 0/035010222 | **1761** | 0/007230373 | 0/018168139 | 0/027593949 |
| 762 | 0/009286741 | 0/019967557 | 0/035010222 | **1762** | 0/007230373 | 0/018168139 | 0/027593949 |
| 763 | 0/009286741 | 0/019967557 | 0/035010222 | **1763** | 0/007230373 | 0/018168139 | 0/027593949 |
| 764 | 0/009286741 | 0/019967557 | 0/035010222 | **1764** | 0/007230373 | 0/018168139 | 0/027593949 |
| 765 | 0/009286741 | 0/019967557 | 0/035010222 | **1765** | 0/007230373 | 0/018168139 | 0/027593949 |
| 766 | 0/009286741 | 0/019967557 | 0/035010222 | **1766** | 0/007230373 | 0/018168139 | 0/027593949 |
| 767 | 0/009286741 | 0/019967557 | 0/035010222 | **1767** | 0/007230373 | 0/018168139 | 0/027593949 |
| 768 | 0/009286741 | 0/019967557 | 0/035010222 | **1768** | 0/007230373 | 0/018168139 | 0/027593949 |
| 769 | 0/009286741 | 0/019967557 | 0/035010222 | **1769** | 0/007230373 | 0/018166882 | 0/027593949 |
| 770 | 0/009286741 | 0/019967557 | 0/035010222 | **1770** | 0/007230373 | 0/018166882 | 0/027593949 |
| 771 | 0/009286741 | 0/019967557 | 0/035010222 | **1771** | 0/007230373 | 0/018166882 | 0/027593949 |
| 772 | 0/009286741 | 0/019967557 | 0/035010222 | **1772** | 0/007230373 | 0/018166882 | 0/027593949 |
| 773 | 0/009286741 | 0/019967557 | 0/035010222 | **1773** | 0/007230373 | 0/0181144 | 0/027593949 |
| 774 | 0/009286741 | 0/019967557 | 0/035010222 | **1774** | 0/007230373 | 0/0181144 | 0/027593949 |
| 775 | 0/009286741 | 0/019967557 | 0/035010222 | **1775** | 0/007230373 | 0/0181144 | 0/027593949 |
| 776 | 0/009286741 | 0/019967557 | 0/035010222 | **1776** | 0/007230373 | 0/0181144 | 0/027593949 |
| 777 | 0/009286741 | 0/019967557 | 0/035010222 | **1777** | 0/007230373 | 0/0181144 | 0/027593949 |
| 778 | 0/009286741 | 0/019967557 | 0/035010222 | **1778** | 0/007230373 | 0/0181144 | 0/027593949 |
| 779 | 0/009286741 | 0/019967557 | 0/035010222 | **1779** | 0/007230373 | 0/0181144 | 0/027593949 |
| 780 | 0/009286741 | 0/019967557 | 0/035010222 | **1780** | 0/007230373 | 0/0181144 | 0/027593949 |
| 781 | 0/009286741 | 0/019967557 | 0/035010222 | **1781** | 0/007230373 | 0/0181144 | 0/027593949 |
| 782 | 0/009286741 | 0/019967557 | 0/035010222 | **1782** | 0/007230373 | 0/0181144 | 0/027593949 |
| 783 | 0/009286741 | 0/019967557 | 0/035010222 | **1783** | 0/007230373 | 0/0181144 | 0/027593949 |
| 784 | 0/009286741 | 0/019967557 | 0/035010222 | **1784** | 0/007230373 | 0/0181144 | 0/027593949 |
| 785 | 0/009286741 | 0/019967557 | 0/035010222 | **1785** | 0/007230373 | 0/0181144 | 0/027593949 |
| 786 | 0/009286741 | 0/019967557 | 0/033344687 | **1786** | 0/007230373 | 0/0181144 | 0/027593949 |
| 787 | 0/009286741 | 0/019967557 | 0/033344687 | **1787** | 0/007230373 | 0/0181144 | 0/027593949 |
| 788 | 0/009286741 | 0/019967557 | 0/033344687 | **1788** | 0/007230373 | 0/0181144 | 0/027593949 |
| 789 | 0/009286741 | 0/019967557 | 0/033344687 | **1789** | 0/007230373 | 0/0181144 | 0/027593949 |
| 790 | 0/009286741 | 0/019967557 | 0/033344687 | **1790** | 0/007230373 | 0/0181144 | 0/027593949 |
| 791 | 0/009286741 | 0/019967557 | 0/033344687 | **1791** | 0/007230373 | 0/0181144 | 0/027593949 |
| 792 | 0/009286741 | 0/019967557 | 0/033344687 | **1792** | 0/007230373 | 0/0181144 | 0/027593949 |
| 793 | 0/009286741 | 0/019967557 | 0/033344687 | **1793** | 0/007230373 | 0/0181144 | 0/027453341 |
| 794 | 0/009286741 | 0/019967557 | 0/033344687 | **1794** | 0/007230373 | 0/0181144 | 0/027453341 |
| 795 | 0/009286741 | 0/019967557 | 0/033344687 | **1795** | 0/007230373 | 0/0181144 | 0/027453341 |
| 796 | 0/009286741 | 0/019967557 | 0/033344687 | **1796** | 0/007230373 | 0/0181144 | 0/027453341 |
| 797 | 0/009286741 | 0/019967557 | 0/033344687 | **1797** | 0/007230373 | 0/0181144 | 0/027453341 |
| 798 | 0/009286741 | 0/019967557 | 0/033344687 | **1798** | 0/007230373 | 0/0181144 | 0/027453341 |
| 799 | 0/009286741 | 0/019967557 | 0/033344687 | **1799** | 0/007230373 | 0/0181144 | 0/027453341 |
| 800 | 0/009286741 | 0/019967557 | 0/033344687 | **1800** | 0/007230373 | 0/0181144 | 0/027453341 |
| 801 | 0/009286741 | 0/019967557 | 0/033344687 | **1801** | 0/007230373 | 0/0181144 | 0/027453341 |
| 802 | 0/009286741 | 0/019967557 | 0/033344687 | **1802** | 0/007230373 | 0/0181144 | 0/027453341 |
| 803 | 0/009286741 | 0/019967557 | 0/033344687 | **1803** | 0/007230373 | 0/0181144 | 0/027453341 |
| 804 | 0/009286741 | 0/019967557 | 0/033344687 | **1804** | 0/007230373 | 0/0181144 | 0/027453341 |
| 805 | 0/009286741 | 0/019967557 | 0/033344687 | **1805** | 0/007230373 | 0/0181144 | 0/027453341 |
| 806 | 0/009286741 | 0/019967557 | 0/033344687 | **1806** | 0/007230373 | 0/0181144 | 0/027453341 |
| 807 | 0/009286741 | 0/019967557 | 0/033344687 | **1807** | 0/007230373 | 0/0181144 | 0/027245072 |
| 808 | 0/009010371 | 0/019967557 | 0/033344687 | **1808** | 0/007230373 | 0/0181144 | 0/027245072 |
| 809 | 0/009010371 | 0/019967557 | 0/033344687 | **1809** | 0/007230373 | 0/0181144 | 0/027245072 |
| 810 | 0/009010371 | 0/019967557 | 0/033344687 | **1810** | 0/007230373 | 0/0181144 | 0/027245072 |
| 811 | 0/009010371 | 0/019967557 | 0/033344687 | **1811** | 0/007230373 | 0/0181144 | 0/027245072 |
| 812 | 0/009010371 | 0/019967557 | 0/033344687 | **1812** | 0/007230373 | 0/0181144 | 0/027245072 |
| 813 | 0/009010371 | 0/019967557 | 0/033344687 | **1813** | 0/007230373 | 0/0181144 | 0/027245072 |
| 814 | 0/009010371 | 0/019967557 | 0/033344687 | **1814** | 0/007230373 | 0/0181144 | 0/027245072 |
| 815 | 0/009010371 | 0/019967557 | 0/033344687 | **1815** | 0/007230373 | 0/0181144 | 0/027245072 |
| 816 | 0/009010371 | 0/019967557 | 0/033344687 | **1816** | 0/007230373 | 0/0181144 | 0/027245072 |
| 817 | 0/009010371 | 0/019967557 | 0/033344687 | **1817** | 0/007230373 | 0/0181144 | 0/027245072 |
| 818 | 0/009010371 | 0/019967557 | 0/033344687 | **1818** | 0/007230373 | 0/0181144 | 0/027245072 |
| 819 | 0/009010371 | 0/019967557 | 0/033344687 | **1819** | 0/007230373 | 0/0181144 | 0/027245072 |
| 820 | 0/009010371 | 0/019967557 | 0/033344687 | **1820** | 0/007230373 | 0/0181144 | 0/027245072 |
| 821 | 0/009010371 | 0/019967557 | 0/033344687 | **1821** | 0/007230373 | 0/0181144 | 0/027245072 |
| 822 | 0/009010371 | 0/019967557 | 0/033344687 | **1822** | 0/007230373 | 0/0181144 | 0/027245072 |
| 823 | 0/009010371 | 0/019967557 | 0/033344687 | **1823** | 0/007230373 | 0/01807068 | 0/027245072 |
| 824 | 0/009010371 | 0/019967557 | 0/033344687 | **1824** | 0/007230373 | 0/01807068 | 0/027245072 |
| 825 | 0/009010371 | 0/019967557 | 0/033344687 | **1825** | 0/007230373 | 0/01807068 | 0/027245072 |
| 826 | 0/009010371 | 0/019967557 | 0/033344687 | **1826** | 0/007230373 | 0/01807068 | 0/027245072 |
| 827 | 0/009010371 | 0/019967557 | 0/033344687 | **1827** | 0/007230373 | 0/01807068 | 0/027245072 |
| 828 | 0/009010371 | 0/019967557 | 0/033344687 | **1828** | 0/007230373 | 0/01807068 | 0/027245072 |
| 829 | 0/009010371 | 0/019967557 | 0/033344687 | **1829** | 0/007230373 | 0/01807068 | 0/027245072 |
| 830 | 0/009010371 | 0/019967557 | 0/033344687 | **1830** | 0/007230373 | 0/01807068 | 0/027245072 |
| 831 | 0/009010371 | 0/019967557 | 0/033344687 | **1831** | 0/007230373 | 0/01807068 | 0/027245072 |
| 832 | 0/009010371 | 0/019967557 | 0/033344687 | **1832** | 0/007230373 | 0/01807068 | 0/027245072 |
| 833 | 0/009010371 | 0/019967557 | 0/033344687 | **1833** | 0/007230373 | 0/01807068 | 0/027245072 |
| 834 | 0/009010371 | 0/019967557 | 0/033344687 | **1834** | 0/007230373 | 0/01807068 | 0/027245072 |
| 835 | 0/009010371 | 0/019967557 | 0/033344687 | **1835** | 0/007230373 | 0/01807068 | 0/027245072 |
| 836 | 0/009010371 | 0/019967557 | 0/033344687 | **1836** | 0/007230373 | 0/01807068 | 0/027245072 |
| 837 | 0/009010371 | 0/019967557 | 0/033344687 | **1837** | 0/007230373 | 0/01807068 | 0/027245072 |
| 838 | 0/009010371 | 0/019967557 | 0/033344687 | **1838** | 0/007230373 | 0/01807068 | 0/027245072 |
| 839 | 0/009010371 | 0/019967557 | 0/033344687 | **1839** | 0/007230373 | 0/01807068 | 0/027245072 |
| 840 | 0/009010371 | 0/019967557 | 0/033344687 | **1840** | 0/007230373 | 0/01807068 | 0/027245072 |
| 841 | 0/009010371 | 0/019967557 | 0/033344687 | **1841** | 0/007230373 | 0/01807068 | 0/027245072 |
| 842 | 0/009010371 | 0/019967557 | 0/033344687 | **1842** | 0/007230373 | 0/01807068 | 0/027245072 |
| 843 | 0/009010371 | 0/019967557 | 0/033344687 | **1843** | 0/007230373 | 0/01807068 | 0/027245072 |
| 844 | 0/009010371 | 0/019967557 | 0/033344687 | **1844** | 0/007230373 | 0/01807068 | 0/027245072 |
| 845 | 0/009010371 | 0/019967557 | 0/033344687 | **1845** | 0/007230373 | 0/01807068 | 0/027245072 |
| 846 | 0/009010371 | 0/019967557 | 0/033344687 | **1846** | 0/007230373 | 0/01807068 | 0/027245072 |
| 847 | 0/009010371 | 0/019967557 | 0/033344687 | **1847** | 0/007230373 | 0/01807068 | 0/027245072 |
| 848 | 0/009010371 | 0/019967557 | 0/033344687 | **1848** | 0/007230373 | 0/01807068 | 0/027245072 |
| 849 | 0/009010371 | 0/019967557 | 0/033344687 | **1849** | 0/007230373 | 0/01807068 | 0/027245072 |
| 850 | 0/009010371 | 0/019967557 | 0/033344687 | **1850** | 0/007230373 | 0/01807068 | 0/027245072 |
| 851 | 0/009010371 | 0/019967557 | 0/033344687 | **1851** | 0/007230373 | 0/01807068 | 0/027174239 |
| 852 | 0/009010371 | 0/019967557 | 0/033344687 | **1852** | 0/007230373 | 0/01807068 | 0/026978985 |
| 853 | 0/009010371 | 0/019967557 | 0/033344687 | **1853** | 0/007230373 | 0/01807068 | 0/026978985 |
| 854 | 0/009010371 | 0/019967557 | 0/033344687 | **1854** | 0/007225179 | 0/01807068 | 0/026978985 |
| 855 | 0/009010371 | 0/019967557 | 0/033344687 | **1855** | 0/007225179 | 0/01807068 | 0/026978985 |
| 856 | 0/009010371 | 0/019967557 | 0/033344687 | **1856** | 0/007225179 | 0/01807068 | 0/026978985 |
| 857 | 0/009010371 | 0/019967557 | 0/033344687 | **1857** | 0/007225179 | 0/01807068 | 0/026978985 |
| 858 | 0/009010371 | 0/019967557 | 0/033344687 | **1858** | 0/007225179 | 0/01807068 | 0/026978985 |
| 859 | 0/009010371 | 0/019967557 | 0/033344687 | **1859** | 0/007225179 | 0/01807068 | 0/026978985 |
| 860 | 0/009010371 | 0/019967557 | 0/033344687 | **1860** | 0/007225179 | 0/01807068 | 0/026978985 |
| 861 | 0/009010371 | 0/019967557 | 0/033344687 | **1861** | 0/007225179 | 0/01807068 | 0/026978985 |
| 862 | 0/009010371 | 0/019967557 | 0/033344687 | **1862** | 0/007225179 | 0/01807068 | 0/026978985 |
| 863 | 0/009010371 | 0/019967557 | 0/033344687 | **1863** | 0/007225179 | 0/01807068 | 0/026978985 |
| 864 | 0/009010371 | 0/019967557 | 0/033344687 | **1864** | 0/007225179 | 0/01807068 | 0/026978985 |
| 865 | 0/008844759 | 0/019967557 | 0/033344687 | **1865** | 0/007225179 | 0/01807068 | 0/026978985 |
| 866 | 0/008844759 | 0/019967557 | 0/033344687 | **1866** | 0/007225179 | 0/01807068 | 0/026978985 |
| 867 | 0/008844759 | 0/019967557 | 0/033344687 | **1867** | 0/007225179 | 0/01807068 | 0/026978985 |
| 868 | 0/008844759 | 0/019967557 | 0/033344687 | **1868** | 0/007225179 | 0/01807068 | 0/026978985 |
| 869 | 0/008844759 | 0/019967557 | 0/033344687 | **1869** | 0/007225179 | 0/01807068 | 0/026978985 |
| 870 | 0/008844759 | 0/019967557 | 0/033344687 | **1870** | 0/007225179 | 0/01807068 | 0/026978985 |
| 871 | 0/008844759 | 0/019967557 | 0/033344687 | **1871** | 0/007225179 | 0/01807068 | 0/026978985 |
| 872 | 0/008844759 | 0/019967557 | 0/033344687 | **1872** | 0/007225179 | 0/01807068 | 0/026978985 |
| 873 | 0/008844759 | 0/019967557 | 0/033344687 | **1873** | 0/007225179 | 0/01807068 | 0/026978985 |
| 874 | 0/008844759 | 0/019967557 | 0/033344687 | **1874** | 0/007225179 | 0/01807068 | 0/026978985 |
| 875 | 0/008844759 | 0/019967557 | 0/033344687 | **1875** | 0/007225179 | 0/01807068 | 0/026978985 |
| 876 | 0/008844759 | 0/019967557 | 0/033344687 | **1876** | 0/007225179 | 0/01807068 | 0/026978985 |
| 877 | 0/008844759 | 0/019967557 | 0/033344687 | **1877** | 0/007225179 | 0/01807068 | 0/026978985 |
| 878 | 0/008844759 | 0/019967557 | 0/033344687 | **1878** | 0/007225179 | 0/01807068 | 0/026978985 |
| 879 | 0/008844759 | 0/019967557 | 0/033344687 | **1879** | 0/007225179 | 0/01807068 | 0/026978985 |
| 880 | 0/008844759 | 0/019967557 | 0/033344687 | **1880** | 0/007225179 | 0/01807068 | 0/026978985 |
| 881 | 0/008844759 | 0/019967557 | 0/033344687 | **1881** | 0/007225179 | 0/01807068 | 0/026978985 |
| 882 | 0/008844759 | 0/019967557 | 0/033344687 | **1882** | 0/007225179 | 0/01807068 | 0/026978985 |
| 883 | 0/008844759 | 0/019967557 | 0/033344687 | **1883** | 0/007225179 | 0/01807068 | 0/026978985 |
| 884 | 0/008844759 | 0/019967557 | 0/033344687 | **1884** | 0/007225179 | 0/01807068 | 0/026736128 |
| 885 | 0/008844759 | 0/019967557 | 0/033344687 | **1885** | 0/007225179 | 0/018053788 | 0/026736128 |
| 886 | 0/008844759 | 0/019967557 | 0/033344687 | **1886** | 0/007225179 | 0/018053788 | 0/026736128 |
| 887 | 0/008844759 | 0/019967557 | 0/033344687 | **1887** | 0/007225179 | 0/018053788 | 0/026700722 |
| 888 | 0/008844759 | 0/019967557 | 0/033344687 | **1888** | 0/007225179 | 0/018053788 | 0/026700722 |
| 889 | 0/008844759 | 0/019967557 | 0/033344687 | **1889** | 0/007225179 | 0/018053788 | 0/0266288 |
| 890 | 0/008844759 | 0/019967557 | 0/033344687 | **1890** | 0/007225179 | 0/018053788 | 0/0266288 |
| 891 | 0/008844759 | 0/019967557 | 0/033344687 | **1891** | 0/007225179 | 0/018053788 | 0/0266288 |
| 892 | 0/008844759 | 0/019967557 | 0/033344687 | **1892** | 0/007225179 | 0/018053788 | 0/0266288 |
| 893 | 0/008844759 | 0/019967557 | 0/033344687 | **1893** | 0/007225179 | 0/018053788 | 0/0266288 |
| 894 | 0/008844759 | 0/019967557 | 0/033344687 | **1894** | 0/007225179 | 0/018053788 | 0/0266288 |
| 895 | 0/008844759 | 0/019967557 | 0/033344687 | **1895** | 0/007225179 | 0/018053788 | 0/026610946 |
| 896 | 0/008844759 | 0/019967557 | 0/033344687 | **1896** | 0/007225179 | 0/018053788 | 0/026610946 |
| 897 | 0/008844759 | 0/019967557 | 0/033344687 | **1897** | 0/007225179 | 0/018053788 | 0/026610946 |
| 898 | 0/008844759 | 0/019967557 | 0/033344687 | **1898** | 0/007225179 | 0/018053788 | 0/026610946 |
| 899 | 0/008844759 | 0/019967557 | 0/033344687 | **1899** | 0/007225179 | 0/018005653 | 0/026610946 |
| 900 | 0/008844759 | 0/019967557 | 0/033344687 | **1900** | 0/007225179 | 0/017955461 | 0/026610946 |
| 901 | 0/008844759 | 0/019967557 | 0/033344687 | **1901** | 0/007225179 | 0/017955461 | 0/026610946 |
| 902 | 0/008844759 | 0/019967557 | 0/033344687 | **1902** | 0/007225179 | 0/017955461 | 0/026610946 |
| 903 | 0/008844759 | 0/019967557 | 0/033344687 | **1903** | 0/007225179 | 0/017955461 | 0/026610946 |
| 904 | 0/008844759 | 0/019967557 | 0/033344687 | **1904** | 0/007225179 | 0/017955461 | 0/026610946 |
| 905 | 0/008844759 | 0/019967557 | 0/033344687 | **1905** | 0/007225179 | 0/01792211 | 0/026610946 |
| 906 | 0/008844759 | 0/019967557 | 0/033344687 | **1906** | 0/007225179 | 0/01792211 | 0/026610946 |
| 907 | 0/008844759 | 0/019967557 | 0/033344687 | **1907** | 0/007225179 | 0/017917078 | 0/026610946 |
| 908 | 0/008844759 | 0/019967557 | 0/033344687 | **1908** | 0/007225179 | 0/017917078 | 0/026610946 |
| 909 | 0/008844759 | 0/019967557 | 0/033344687 | **1909** | 0/007225179 | 0/017917078 | 0/026601152 |
| 910 | 0/008844759 | 0/019967557 | 0/033344687 | **1910** | 0/007225179 | 0/017917078 | 0/026601152 |
| 911 | 0/008844759 | 0/019967557 | 0/033344687 | **1911** | 0/007225179 | 0/017917078 | 0/026601152 |
| 912 | 0/008844759 | 0/019967557 | 0/033344687 | **1912** | 0/00722288 | 0/017917078 | 0/026601152 |
| 913 | 0/008844759 | 0/019967557 | 0/033344687 | **1913** | 0/00722288 | 0/017899923 | 0/026601152 |
| 914 | 0/008844759 | 0/019967557 | 0/033344687 | **1914** | 0/00722288 | 0/017899923 | 0/026565876 |
| 915 | 0/008844759 | 0/019967557 | 0/033344687 | **1915** | 0/00722288 | 0/017899923 | 0/026565876 |
| 916 | 0/008844759 | 0/019967557 | 0/033344687 | **1916** | 0/00722288 | 0/017899923 | 0/026565876 |
| 917 | 0/008844759 | 0/019967557 | 0/033344687 | **1917** | 0/00722288 | 0/017899923 | 0/026397461 |
| 918 | 0/008844759 | 0/019967557 | 0/033344687 | **1918** | 0/00722288 | 0/017899923 | 0/026397461 |
| 919 | 0/008844759 | 0/019967557 | 0/033344687 | **1919** | 0/00722288 | 0/017899923 | 0/026397461 |
| 920 | 0/008844759 | 0/019967557 | 0/033344687 | **1920** | 0/007210442 | 0/017899923 | 0/026397461 |
| 921 | 0/008844759 | 0/019967557 | 0/033344687 | **1921** | 0/007210442 | 0/017899923 | 0/026397461 |
| 922 | 0/008844759 | 0/019967557 | 0/033344687 | **1922** | 0/007210442 | 0/017899923 | 0/026334236 |
| 923 | 0/008844759 | 0/019967557 | 0/033344687 | **1923** | 0/007210442 | 0/017899923 | 0/026334236 |
| 924 | 0/008844759 | 0/019967557 | 0/033344687 | **1924** | 0/007210442 | 0/017899923 | 0/026334236 |
| 925 | 0/008844759 | 0/019967557 | 0/033344687 | **1925** | 0/007210123 | 0/017899923 | 0/026334236 |
| 926 | 0/008844759 | 0/019967557 | 0/033344687 | **1926** | 0/007210123 | 0/017899923 | 0/026334236 |
| 927 | 0/008844759 | 0/019967557 | 0/033344687 | **1927** | 0/007210123 | 0/017899923 | 0/026334236 |
| 928 | 0/008844759 | 0/019967557 | 0/033344687 | **1928** | 0/007210123 | 0/017899923 | 0/026327679 |
| 929 | 0/008844759 | 0/019967557 | 0/033344687 | **1929** | 0/007210123 | 0/017899923 | 0/026327679 |
| 930 | 0/008844759 | 0/019967557 | 0/033344687 | **1930** | 0/007210123 | 0/017899923 | 0/026327679 |
| 931 | 0/008844759 | 0/019967557 | 0/033344687 | **1931** | 0/007210123 | 0/017899923 | 0/026327679 |
| 932 | 0/008844759 | 0/019967557 | 0/033344687 | **1932** | 0/007210123 | 0/017899923 | 0/026327679 |
| 933 | 0/008844759 | 0/019967557 | 0/033344687 | **1933** | 0/007210123 | 0/017899923 | 0/026190307 |
| 934 | 0/008844759 | 0/019967557 | 0/033344687 | **1934** | 0/007210123 | 0/017899923 | 0/026190307 |
| 935 | 0/008844759 | 0/019967557 | 0/033344687 | **1935** | 0/007210123 | 0/01787966 | 0/026190307 |
| 936 | 0/008844759 | 0/019967557 | 0/033344687 | **1936** | 0/007210123 | 0/01787966 | 0/026190307 |
| 937 | 0/008844759 | 0/019967557 | 0/033344687 | **1937** | 0/007210123 | 0/01787966 | 0/026190307 |
| 938 | 0/008844759 | 0/019967557 | 0/033344687 | **1938** | 0/007210123 | 0/01787966 | 0/026190307 |
| 939 | 0/008844759 | 0/019967557 | 0/033344687 | **1939** | 0/007210123 | 0/01787966 | 0/026190307 |
| 940 | 0/008844759 | 0/019967557 | 0/033344687 | **1940** | 0/007210123 | 0/01787966 | 0/026166071 |
| 941 | 0/008844759 | 0/019967557 | 0/033344687 | **1941** | 0/007210123 | 0/01787966 | 0/026166071 |
| 942 | 0/008844759 | 0/019967557 | 0/033344687 | **1942** | 0/007210123 | 0/017843274 | 0/026166071 |
| 943 | 0/008844759 | 0/019967557 | 0/033344687 | **1943** | 0/007210123 | 0/017843274 | 0/026166071 |
| 944 | 0/008844759 | 0/019967557 | 0/033344687 | **1944** | 0/007210123 | 0/017843274 | 0/02596988 |
| 945 | 0/008844759 | 0/019967557 | 0/033344687 | **1945** | 0/007191529 | 0/017843274 | 0/02596988 |
| 946 | 0/008844759 | 0/019967557 | 0/033344687 | **1946** | 0/007191529 | 0/017843274 | 0/02596988 |
| 947 | 0/008844759 | 0/019967557 | 0/033344687 | **1947** | 0/007191529 | 0/017843274 | 0/025940334 |
| 948 | 0/008844759 | 0/019967557 | 0/033344687 | **1948** | 0/007191529 | 0/017843274 | 0/025940334 |
| 949 | 0/008844759 | 0/019967557 | 0/033344687 | **1949** | 0/007191529 | 0/017843274 | 0/025940334 |
| 950 | 0/008844759 | 0/019967557 | 0/033344687 | **1950** | 0/007191529 | 0/017843274 | 0/025940334 |
| 951 | 0/008844759 | 0/019967557 | 0/033344687 | **1951** | 0/007191529 | 0/017843274 | 0/025940334 |
| 952 | 0/008844759 | 0/019967557 | 0/033344687 | **1952** | 0/007191529 | 0/017843274 | 0/025940334 |
| 953 | 0/008844759 | 0/019967557 | 0/033344687 | **1953** | 0/007191529 | 0/017843274 | 0/025940334 |
| 954 | 0/008844759 | 0/019967557 | 0/033344687 | **1954** | 0/007191529 | 0/017843274 | 0/025940334 |
| 955 | 0/008844759 | 0/019967557 | 0/033344687 | **1955** | 0/007191529 | 0/017843274 | 0/025940334 |
| 956 | 0/008844759 | 0/019967557 | 0/033344687 | **1956** | 0/007191529 | 0/017843274 | 0/025940334 |
| 957 | 0/008844759 | 0/019967557 | 0/033344687 | **1957** | 0/007191529 | 0/017843274 | 0/025940334 |
| 958 | 0/008844759 | 0/019967557 | 0/033344687 | **1958** | 0/007191529 | 0/017843274 | 0/025940334 |
| 959 | 0/008844759 | 0/019967557 | 0/033344687 | **1959** | 0/007191049 | 0/017843274 | 0/025940334 |
| 960 | 0/008844759 | 0/019967557 | 0/033344687 | **1960** | 0/007188629 | 0/017843274 | 0/025913969 |
| 961 | 0/008844759 | 0/019967557 | 0/033344687 | **1961** | 0/007188629 | 0/017843274 | 0/025913969 |
| 962 | 0/008844759 | 0/019967557 | 0/033344687 | **1962** | 0/007188629 | 0/017843274 | 0/025913969 |
| 963 | 0/008844759 | 0/019967557 | 0/033344687 | **1963** | 0/007188629 | 0/017843274 | 0/025913969 |
| 964 | 0/008844759 | 0/019967557 | 0/033344687 | **1964** | 0/007188629 | 0/017843274 | 0/025881548 |
| 965 | 0/008844759 | 0/019967557 | 0/033344687 | **1965** | 0/007188629 | 0/017843274 | 0/025881548 |
| 966 | 0/008844759 | 0/019967557 | 0/033344687 | **1966** | 0/007188629 | 0/017843274 | 0/025881548 |
| 967 | 0/008844759 | 0/019967557 | 0/033344687 | **1967** | 0/007188629 | 0/017843274 | 0/025827622 |
| 968 | 0/008844759 | 0/019967557 | 0/033344687 | **1968** | 0/007188629 | 0/017843274 | 0/025827622 |
| 969 | 0/008844759 | 0/019967557 | 0/033344687 | **1969** | 0/007188629 | 0/017843274 | 0/025827622 |
| 970 | 0/008844759 | 0/019967557 | 0/033344687 | **1970** | 0/007188629 | 0/017843274 | 0/025827622 |
| 971 | 0/008844759 | 0/019967557 | 0/033344687 | **1971** | 0/007188629 | 0/017843274 | 0/025827622 |
| 972 | 0/008844759 | 0/019967557 | 0/033344687 | **1972** | 0/007188629 | 0/017843274 | 0/025817649 |
| 973 | 0/008844759 | 0/019967557 | 0/033344687 | **1973** | 0/007188629 | 0/017843274 | 0/025817649 |
| 974 | 0/008844759 | 0/019967557 | 0/033344687 | **1974** | 0/007188629 | 0/017843274 | 0/025817649 |
| 975 | 0/008844759 | 0/019967557 | 0/033344687 | **1975** | 0/007179893 | 0/017843274 | 0/025817649 |
| 976 | 0/008844759 | 0/019967557 | 0/033344687 | **1976** | 0/007179893 | 0/017843274 | 0/025817649 |
| 977 | 0/008844759 | 0/019967557 | 0/033344687 | **1977** | 0/007179893 | 0/017843274 | 0/025817649 |
| 978 | 0/008844759 | 0/019967557 | 0/033344687 | **1978** | 0/007179893 | 0/017843274 | 0/025817649 |
| 979 | 0/008844759 | 0/019967557 | 0/033344687 | **1979** | 0/007179893 | 0/017843274 | 0/025808419 |
| 980 | 0/008844759 | 0/019967557 | 0/033344687 | **1980** | 0/007179893 | 0/017843274 | 0/025808419 |
| 981 | 0/008844759 | 0/019967557 | 0/033344687 | **1981** | 0/007179893 | 0/017828787 | 0/025808419 |
| 982 | 0/008844759 | 0/019967557 | 0/033344687 | **1982** | 0/007179893 | 0/017828787 | 0/025779526 |
| 983 | 0/008844759 | 0/019967557 | 0/033344687 | **1983** | 0/007179893 | 0/017828787 | 0/025779526 |
| 984 | 0/008844759 | 0/019967557 | 0/033344687 | **1984** | 0/007179893 | 0/017828787 | 0/025770172 |
| 985 | 0/008844759 | 0/019967557 | 0/033344687 | **1985** | 0/007179893 | 0/017828787 | 0/025770172 |
| 986 | 0/008844759 | 0/019967557 | 0/033344687 | **1986** | 0/007179893 | 0/017824275 | 0/025770172 |
| 987 | 0/008844759 | 0/019967557 | 0/033344687 | **1987** | 0/007179893 | 0/017824275 | 0/025770172 |
| 988 | 0/008844759 | 0/019967557 | 0/033344687 | **1988** | 0/007179893 | 0/017810331 | 0/025750711 |
| 989 | 0/008844759 | 0/019967557 | 0/033344687 | **1989** | 0/007176773 | 0/017810331 | 0/025712833 |
| 990 | 0/008844759 | 0/019967557 | 0/033344687 | **1990** | 0/007176773 | 0/017797483 | 0/025712833 |
| 991 | 0/008844759 | 0/019967557 | 0/033344687 | **1991** | 0/007176773 | 0/017797483 | 0/025642731 |
| 992 | 0/008844759 | 0/019967557 | 0/033344687 | **1992** | 0/007176773 | 0/017797483 | 0/025642731 |
| 993 | 0/008844759 | 0/019967557 | 0/033344687 | **1993** | 0/007176773 | 0/017785543 | 0/025642731 |
| 994 | 0/008844759 | 0/019967557 | 0/033344687 | **1994** | 0/007176373 | 0/017785543 | 0/025642731 |
| 995 | 0/008844759 | 0/019967557 | 0/033344687 | **1995** | 0/007176373 | 0/017781357 | 0/025637735 |
| 996 | 0/008844759 | 0/019967557 | 0/033344687 | **1996** | 0/007176373 | 0/017777161 | 0/025620345 |
| 997 | 0/008844759 | 0/019967557 | 0/033344687 | **1997** | 0/007176373 | 0/017776602 | 0/025620345 |
| 998 | 0/008844759 | 0/019967557 | 0/033344687 | **1998** | 0/007174804 | 0/017776602 | 0/025615834 |
| 999 | 0/008844759 | 0/019967557 | 0/033344687 | **1999** | 0/007174804 | 0/017776602 | 0/025615834 |
| 1000 | 0/008844759 | 0/019967557 | 0/033344687 | **2000** | 0/007174804 | 0/017772993 | 0/025608264 |

Table 17. Cost function convergence for Damage Scenario 1 under varying noise levels - MRFO.

| Iterations | 0% Noise | 3% Noise | 10% Noise | Iterations | 0% Noise | 3% Noise | 10% Noise |
| --- | --- | --- | --- | --- | --- | --- | --- |
| 1 | 0/236632583 | 0/285588701 | 0/275201935 | **1001** | 0/000829831 | 0/007304867 | 0/026201866 |
| 2 | 0/228377121 | 0/229838605 | 0/211757064 | **1002** | 0/000829831 | 0/007304867 | 0/026201866 |
| 3 | 0/202279869 | 0/157109936 | 0/156650491 | **1003** | 0/000829831 | 0/007304867 | 0/026201866 |
| 4 | 0/109047906 | 0/1235512 | 0/109553366 | **1004** | 0/000829831 | 0/007304867 | 0/026201866 |
[truncated: 819,313 more chars]
